# Supplementary material for: Insights into Barley Root Transcriptome under Mild Drought Stress with an Emphasis on Gene Expression Regulatory Mechanisms
Source: Int J Mol Sci. 2019 Dec 5;20(24):6139. doi: 10.3390/ijms20246139 (PMC6940957; doi:10.3390/ijms20246139)
Supplement: Supplementary file 1 [file ijms-20-06139-s001.zip › Supplementary Figures.pdf]

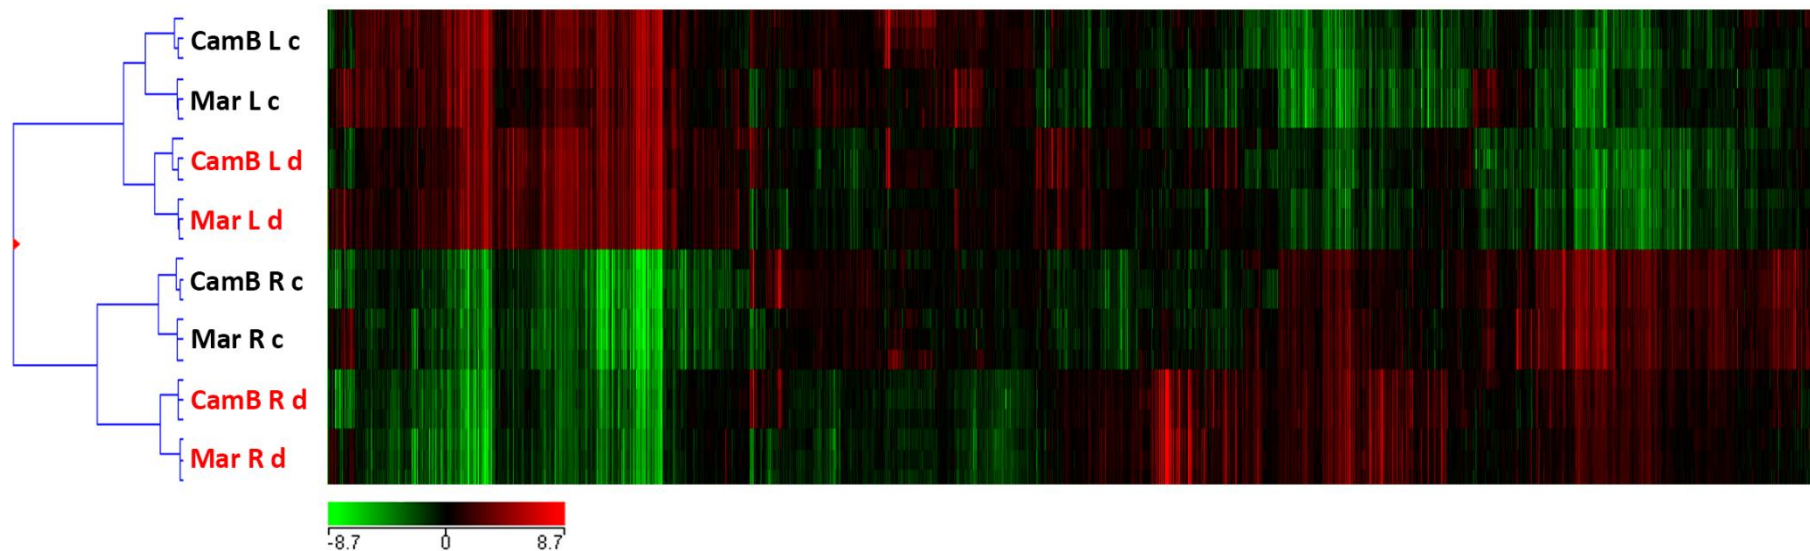

**Supplementary Figure S1.** Hierarchical clustering of microarray data from CamB and Maresi (Mar) genotypes, L – leaves, R – roots, c – control conditions, d – drought stress

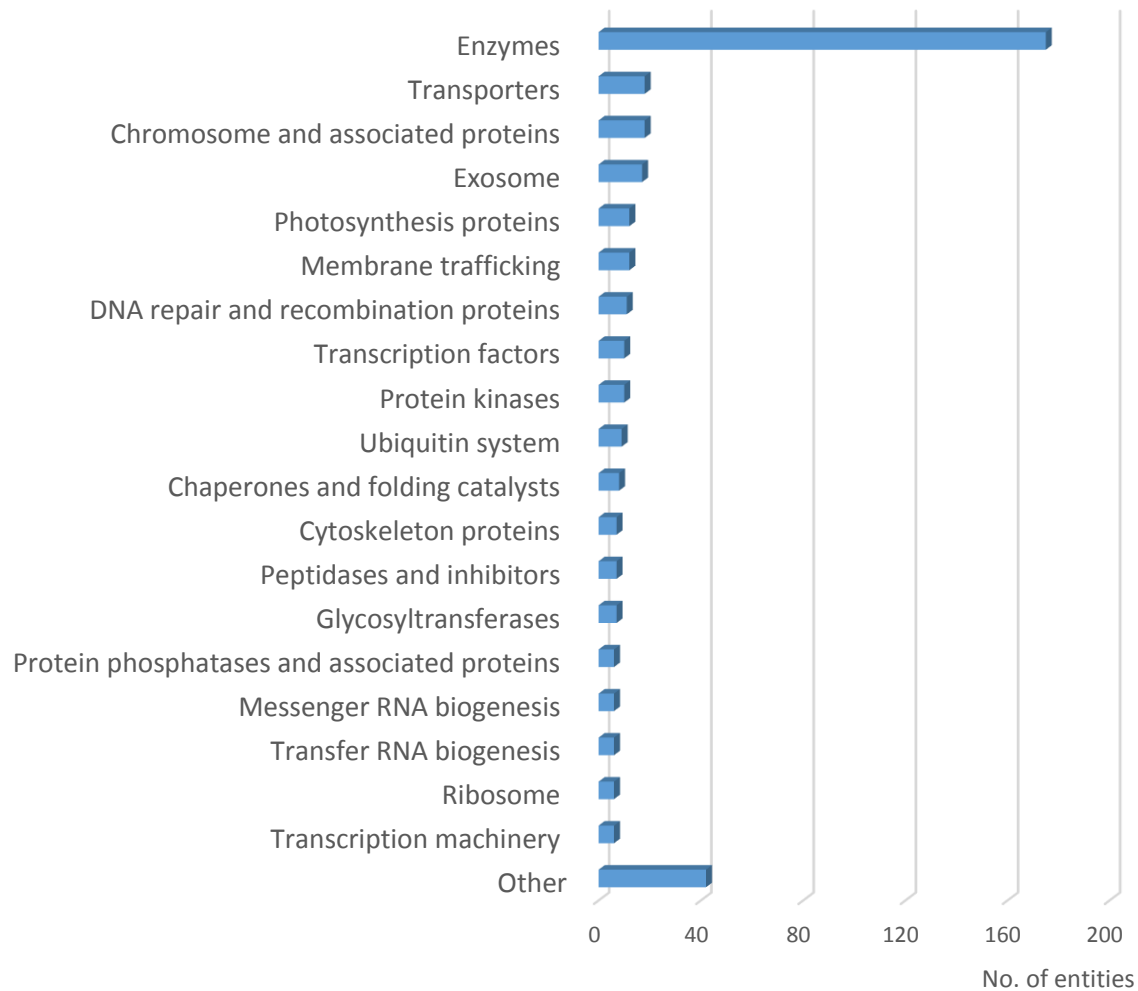

**Supplementary Figure S2.** BRITE functional hierarchies of all genes differentially expressed upon mild drought treatment of barley seedlings

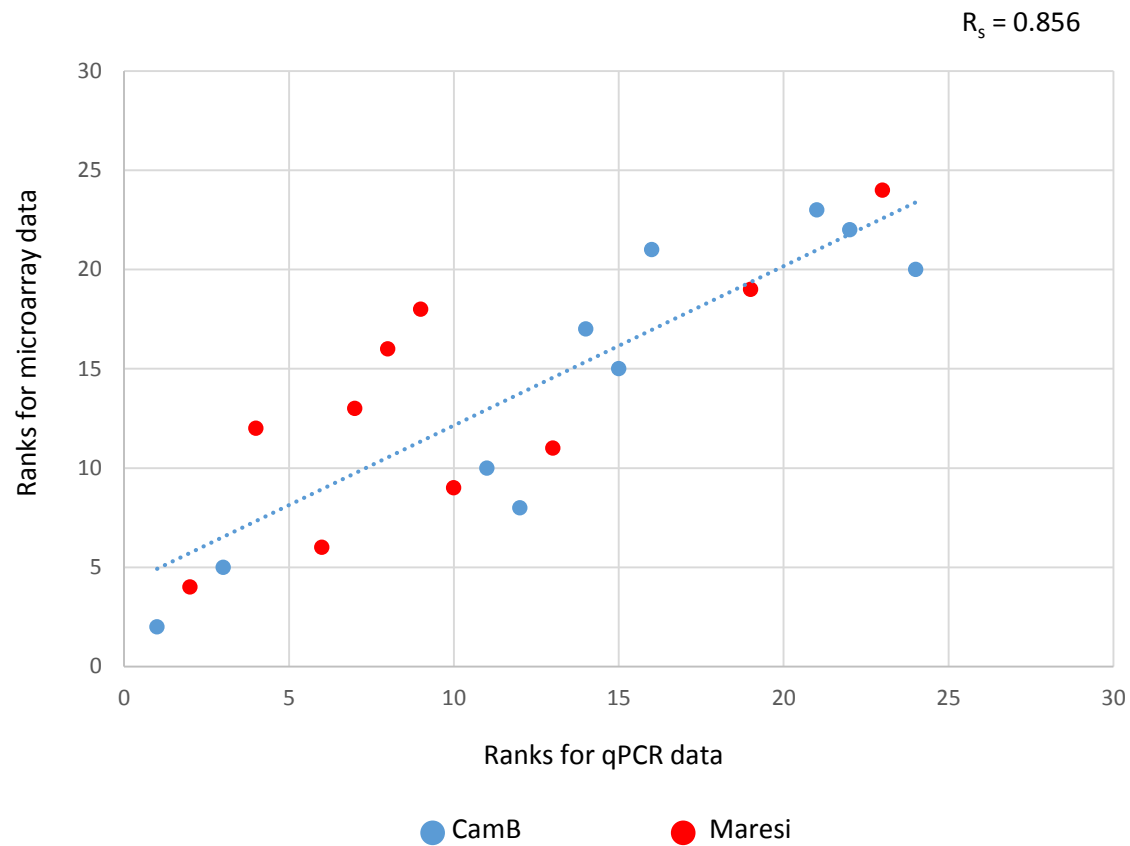

**Supplementary Figure S3.** Spearman's rank correlation coefficient analysis comparing microarray and qPCR fold change data for selected root DEGs

## Biological processes

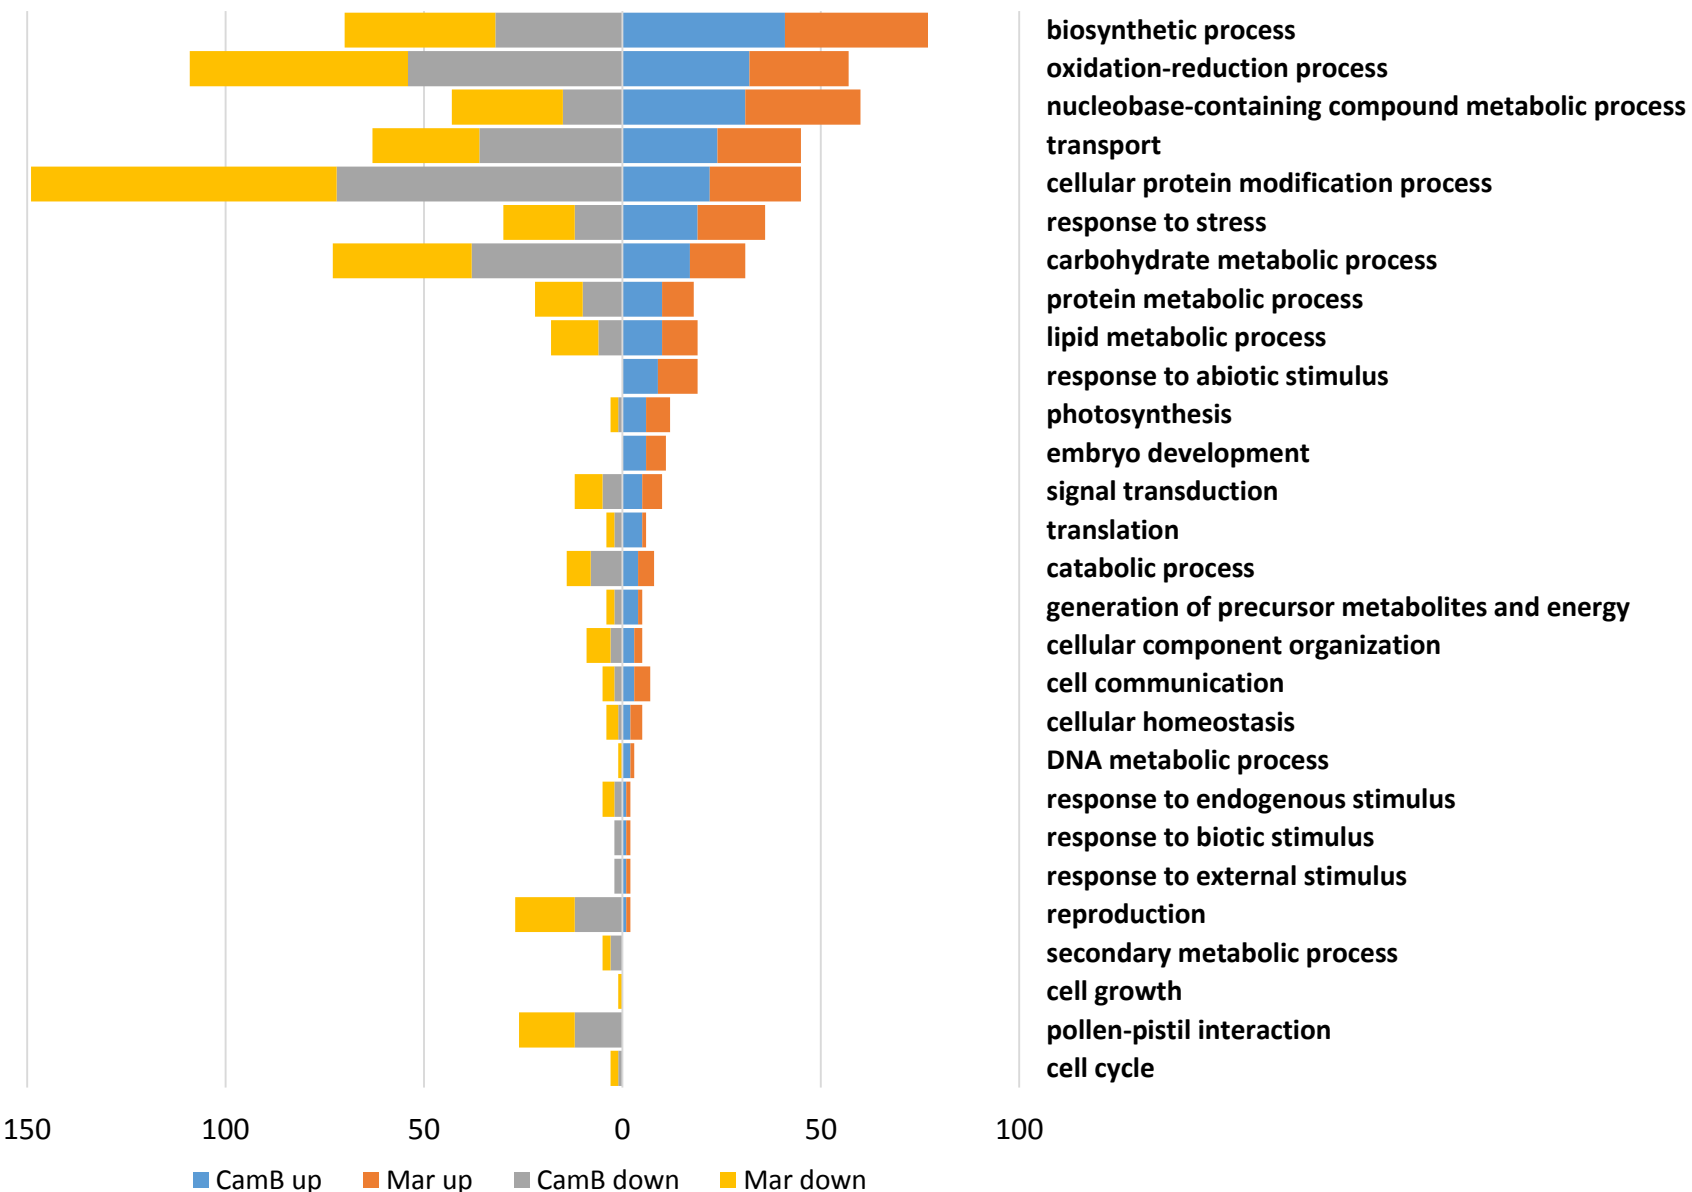

**Supplementary Figure S4A.** Enrichment analysis of Gene Ontology of Biological processes (GO slim) of genes differentially expressed in roots of CamB and Maresi (Mar) genotypes after the mild drought stress.

# Molecular function

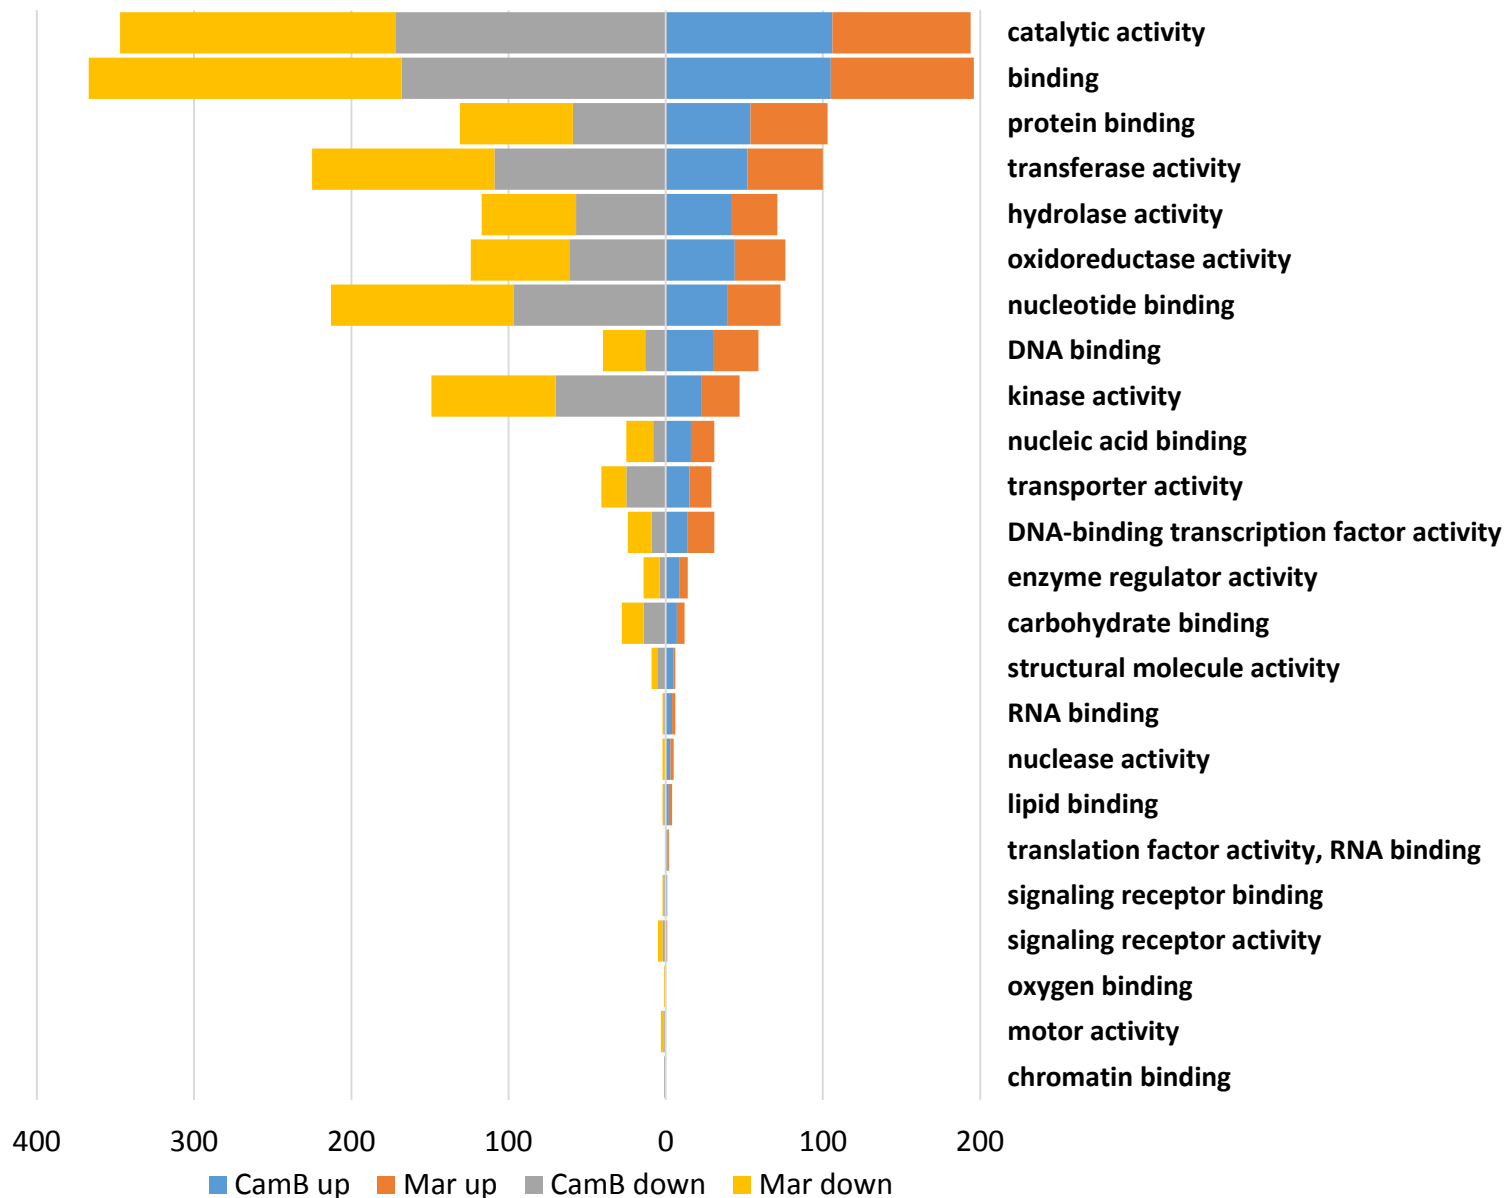

**Supplementary Figure S4B.** Enrichment analysis of Gene Ontology of Molecular function (GO slim) of genes differentially expressed in roots of CamB and Maresi (Mar) genotypes after the mild drought stress.

# Cellular component

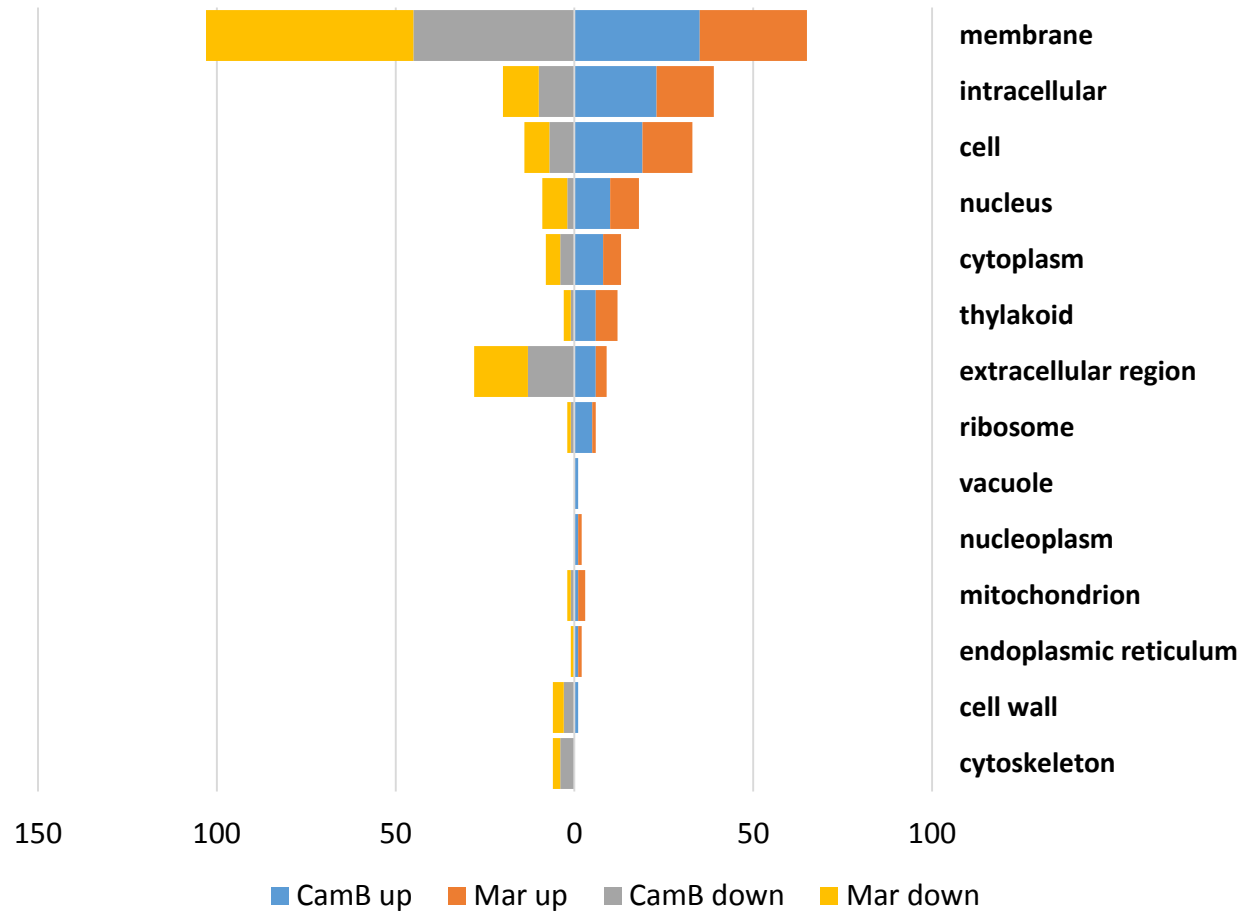

**Supplementary Figure S4C.** Enrichment analysis of Gene Ontology of Cellular component (GO slim) of genes differentially expressed in roots of CamB and Maresi (Mar) genotypes after the mild drought stress.
