# Supplementary material for: Insights into Barley Root Transcriptome under Mild Drought Stress with an Emphasis on Gene Expression Regulatory Mechanisms
Source: Int J Mol Sci. 2019 Dec 5;20(24):6139. doi: 10.3390/ijms20246139 (PMC6940957; doi:10.3390/ijms20246139)
Supplement: Supplementary file 1 [file ijms-20-06139-s001.zip › Supplementary_Tables_S1_S10.xlsx]

## Sheet: Supplementary Table S1
Supplementary Table S1. The list all of differentially expressed genes in roots and leaves of CamB and Maresi genotypes under mild drought treatment. Gene ID (Horvu) - gene identifier based on the barley genome assembly (version Hv_IBSC_PGSB_v2, EnsemblPlants database); Gene ID (MLOC) - gene identifier based on the first barley genome assembly (version 082214v1, EnsemblPlants database). Gene desc…
Gene_ID (HORVU)	Gene_ID (MLOC)	Gene description	GO-IDs	PFAM-IDs	InterPro-IDs	Expression change
						CamB roots	Mar roots	CamB leaves	Mar leaves
AGP50745	unknown	DNA-directed RNA polymerase subunit beta, DNA-directed RNA polymerase subunit beta							up
AGP50747	unknown	DNA-directed RNA polymerase subunit beta'', DNA-directed RNA polymerase subunit beta						up
HORVU0Hr1G000020	MLOC_5295	Leucine-rich repeat receptor-like protein kinase family protein	GO:0004672, GO:0005515, GO:0005524, GO:0006468	PF00069, PF00560, PF08263, PF13855	IPR000719, IPR001611, IPR002290, IPR003591, IPR008266, IPR011009, IPR013210, IPR013320, IPR032675				down
HORVU0Hr1G000910	unknown	Glucan 1,3-beta-glucosidase	GO:0004553, GO:0005975, GO:0030674, GO:0051015	PF00150, PF06268	IPR001547, IPR008999, IPR013781, IPR017853, IPR018087, IPR022768	down	down		down
HORVU0Hr1G001070	MLOC_14006	protein kinase family protein	GO:0004672, GO:0005515, GO:0005524, GO:0006468	PF00069, PF08263, PF13855	IPR000719, IPR001611, IPR002290, IPR008271, IPR011009, IPR013210, IPR013320, IPR017441, IPR032675			down
HORVU0Hr1G001490	MLOC_53469	Photosystem I reaction center subunit VI, chloroplastic	GO:0009522, GO:0009538, GO:0015979	PF03244	IPR004928, IPR029027	up	up
HORVU0Hr1G002930	MLOC_57550	unknown function	none	PF07816	IPR012442		down
HORVU0Hr1G003020	MLOC_38061	MADS-box transcription factor 18	GO:0003700, GO:0005634, GO:0006355	PF01486	IPR002487		down
HORVU0Hr1G003270	MLOC_72691	Oxygen-evolving enhancer protein 3-1, chloroplastic	GO:0005509, GO:0009523, GO:0009654, GO:0015979, GO:0019898	PF05757	IPR008797, IPR023222	up	up
HORVU0Hr1G003810	MLOC_72786	U-box domain-containing protein	GO:0004842, GO:0005488, GO:0016567	PF04564	IPR003613, IPR011989, IPR013083, IPR016024			down
HORVU0Hr1G004850	MLOC_8976	Peroxidase superfamily protein	GO:0004601, GO:0006979, GO:0020037, GO:0055114	PF00141	IPR000823, IPR002016, IPR010255, IPR019793		down
HORVU0Hr1G005160	MLOC_67489	L-allo-threonine aldolase	GO:0003824, GO:0006520, GO:0016829	PF01212	IPR001597, IPR015421, IPR015422, IPR015424, IPR023603			up	up
HORVU0Hr1G005300	MLOC_61497	2-oxoglutarate (2OG) and Fe(II)-dependent oxygenase superfamily protein	GO:0016491, GO:0055114	PF03171, PF14226	IPR005123, IPR026992, IPR027443			down	down
HORVU0Hr1G007340	MLOC_64719	Progesterone 5 beta reductase	none	none	IPR016040	up	up	up	up
HORVU0Hr1G007430	unknown	CAP (Cysteine-rich secretory proteins, Antigen 5, and Pathogenesis-related 1 protein) superfamily protein	none	PF00188	IPR001283, IPR014044	down	down
HORVU0Hr1G007470	MLOC_82019	Jasmonate induced protein	none	none	none	up			up
HORVU0Hr1G008590	MLOC_70112	Cyclin-B1-5	none	none	none				down
HORVU0Hr1G008950	MLOC_72702	Branched-chain-amino-acid aminotransferase 6	GO:0003824, GO:0004084, GO:0008152, GO:0009081	PF01063	IPR001544, IPR005786, IPR018300	up	up	up	up
HORVU0Hr1G009170	unknown	undescribed protein	none	none	none			down
HORVU0Hr1G009370	MLOC_35834	unknown protein					down
HORVU0Hr1G010000	MLOC_60093	Core-2/I-branching beta-1,6-N-acetylglucosaminyltransferase family protein	GO:0008375, GO:0016020	PF02485	IPR003406	up
HORVU0Hr1G011840	MLOC_14255	unknown function	GO:0006950	PF03242	IPR004926		down
HORVU0Hr1G012140	MLOC_80365	Leucine-rich repeat receptor-like protein kinase family protein	none	none	IPR032675			up	up
HORVU0Hr1G012460	MLOC_74933	Plastid-lipid-associated protein, chloroplastic	none	PF04755	IPR006843	up	up
HORVU0Hr1G012930	unknown	undescribed protein	none	none	none	up	up	up	up
HORVU0Hr1G013850	MLOC_14114	Succinate dehydrogenase [ubiquinone] flavoprotein subunit, mitochondrial	GO:0006099, GO:0016491, GO:0016627, GO:0022900, GO:0050660, GO:0055114	PF00890, PF02910	IPR003953, IPR011281, IPR014006, IPR015939, IPR023753, IPR027477, IPR030664	up
HORVU0Hr1G013900	MLOC_75010	L-lactate dehydrogenase	GO:0003824, GO:0010181, GO:0016491, GO:0055114	PF01070	IPR000262, IPR008259, IPR012133, IPR013785	up
HORVU0Hr1G013950	MLOC_79342	G-box binding factor 3	GO:0003700, GO:0006355, GO:0043565	PF00170	IPR004827	up	up
HORVU0Hr1G014900	MLOC_25460	Trihelix transcription factor GT-2	none	PF13837	IPR001005, IPR017877				up
HORVU0Hr1G015370	MLOC_179	Protein of unknown function (DUF579)	GO:0045492	PF04669	IPR006514, IPR021148	down	down
HORVU0Hr1G016170	MLOC_28277	unknown function	none	PF05627	IPR008700			up	up
HORVU0Hr1G016330	MLOC_67067	phenylalanine ammonia-lyase 2	GO:0003824, GO:0005737, GO:0006559, GO:0016841	PF00221	IPR001106, IPR005922, IPR008948, IPR022313, IPR023144, IPR024083			up
HORVU0Hr1G016480	MLOC_54368	RING/U-box superfamily protein	GO:0005515, GO:0008270	PF13639	IPR001841, IPR013083			up	up
HORVU0Hr1G017080	MLOC_66376	microtubule-associated proteins 70-2	GO:0007010, GO:0008017	PF07058	IPR009768			up
HORVU0Hr1G017230	MLOC_33219	ribonuclease 1	GO:0003723, GO:0033897	PF00445	IPR001568, IPR018188	up	up
HORVU0Hr1G017530	MLOC_3789	BnaC01g00720D protein	none	none	none				up
HORVU0Hr1G017570	MLOC_10957	Inosine-5'-monophosphate dehydrogenase	GO:0003824	PF00571	IPR000644, IPR013785		up
HORVU0Hr1G018190	MLOC_58764	4-coumarate:CoA ligase 3	GO:0003824, GO:0008152	PF00501	IPR000873, IPR020845	up	up	up
HORVU0Hr1G020420	MLOC_62670	17.6 kDa class II heat shock protein	none	PF00011	IPR002068, IPR008978			up	up
HORVU0Hr1G021500	MLOC_57261	exocyst subunit exo70 family protein F1	GO:0000145, GO:0006887	PF03081	IPR004140, IPR016159			up
HORVU0Hr1G021640	MLOC_71258	hemoglobin 3	GO:0019825, GO:0020037	PF01152	IPR001486, IPR009050, IPR012292		down
HORVU0Hr1G021760	MLOC_17178	cytochrome P450, family 706, subfamily A, polypeptide 7	GO:0005506, GO:0016705, GO:0020037, GO:0055114	PF00067	IPR001128, IPR002401, IPR017972	up	up
HORVU0Hr1G021850	unknown	Protein of unknown function (DUF581)	none	PF04570	IPR007650	down	down	down	down
HORVU0Hr1G022140	MLOC_63000	germin-like protein 2	GO:0030145, GO:0045735	PF00190	IPR001929, IPR006045, IPR011051, IPR014710	down	down
HORVU0Hr1G022480	MLOC_69163	Ubiquitin system component Cue protein	GO:0005515	PF02845	IPR003892	down
HORVU0Hr1G022750	MLOC_27151	unknown function	none	none	none	down	down
HORVU0Hr1G023080	MLOC_27151	unknown function	none	none	none	down	down	up
HORVU0Hr1G023330	MLOC_17544	undescribed protein	none	none	none		down
HORVU0Hr1G023360	MLOC_55444	Early light-induced protein 1, chloroplastic	none	PF00504	IPR022796, IPR023329	up	up	up
HORVU0Hr1G023540	MLOC_53783	trehalose-6-phosphate phosphatase	GO:0003824, GO:0005992	PF02358	IPR003337, IPR006379, IPR023214	down
HORVU0Hr1G025660	MLOC_39160	sulfotransferase 4B	GO:0008146	PF00685	IPR000863, IPR027417	down
HORVU0Hr1G025850	unknown	Non-specific lipid-transfer protein-like protein	none	PF14368	IPR016140			up	up
HORVU0Hr1G035910	MLOC_22426	unknown function	none	none	IPR032675		up
HORVU0Hr1G038430	MLOC_8115	3-ketoacyl-CoA synthase 6	GO:0003824, GO:0006633, GO:0008152, GO:0008610, GO:0016020, GO:0016747	PF08392, PF08541	IPR012392, IPR013601, IPR013747, IPR016039	down	down	up	up
HORVU0Hr1G039010	MLOC_251	Leucine-rich repeat receptor-like protein kinase family protein	GO:0005515	PF00560, PF08263, PF13855	IPR001611, IPR003591, IPR013210, IPR032675		down
HORVU0Hr1G039310	MLOC_10339	Protein of Unknown Function (DUF239)	none	PF03080	IPR004314		down
HORVU0Hr1G040200	MLOC_38629	coenzyme F420 hydrogenase family / dehydrogenase, beta subunit family	GO:0003824, GO:0016491, GO:0055114	PF04422, PF04432	IPR007516, IPR007525, IPR011254	down
HORVU1Hr1G000030	MLOC_55537	unknown function	none	none	none				up
HORVU1Hr1G000520	MLOC_43909	E3 ubiquitin-protein ligase ORTHRUS 2	GO:0005515, GO:0008270, GO:0042393	PF02182, PF13445, PF13920	IPR001841, IPR003105, IPR013083, IPR015947, IPR017907, IPR027370				down
HORVU1Hr1G000660	MLOC_60692	Leucine-rich receptor-like protein kinase family protein	GO:0004672, GO:0005515, GO:0005524, GO:0006468	PF00069, PF00560, PF08263, PF13855	IPR000719, IPR001611, IPR003591, IPR008266, IPR011009, IPR013210, IPR013320, IPR017441, IPR032675		down
HORVU1Hr1G001560	MLOC_10413	Glutathione S-transferase family protein	GO:0005515	PF13417, PF14497	IPR004045, IPR004046, IPR010987, IPR012336		down
HORVU1Hr1G001660	MLOC_63347	receptor-like protein kinase 4	GO:0004672, GO:0005524, GO:0006468	PF00069	IPR000719, IPR002290, IPR008271, IPR011009, IPR017441		up
HORVU1Hr1G001850	MLOC_66081	12-oxophytodienoate reductase 2	GO:0003824, GO:0010181, GO:0016491, GO:0055114	PF00724	IPR001155, IPR013785		down
HORVU1Hr1G001960	MLOC_44678	12-oxophytodienoate reductase 2	GO:0003824, GO:0010181, GO:0016491, GO:0055114	PF00724	IPR001155, IPR013785	down
HORVU1Hr1G002090	MLOC_58866	arginine decarboxylase 1	GO:0003824, GO:0006527, GO:0008295, GO:0008792	PF00278, PF02784	IPR000183, IPR002985, IPR009006, IPR022643, IPR022644, IPR022657, IPR029066	up	up	up	up
HORVU1Hr1G002100	MLOC_76181	Defensin-like protein	GO:0006952	PF00304	IPR003614, IPR008176, IPR008177	up	up	up	up
HORVU1Hr1G002470	MLOC_76814	receptor-like protein kinase 4	GO:0004672, GO:0005524, GO:0006468	PF00069	IPR000719, IPR002290, IPR008271, IPR011009, IPR013320, IPR017441		up
HORVU1Hr1G002760	unknown	thionin 2.2	none	none	none	up
HORVU1Hr1G004080	MLOC_9888	Disease resistance protein	GO:0043531	PF00931	IPR002182, IPR027417, IPR032675	down
HORVU1Hr1G004130	MLOC_67967	Chymotrypsin inhibitor	GO:0004867, GO:0009611	PF00280	IPR000864	up	up
HORVU1Hr1G004580	MLOC_70133	Cysteine proteinases superfamily protein	none	PF08246	IPR013201	up
HORVU1Hr1G004790	MLOC_10300	Leucine-rich repeat protein kinase family protein	GO:0005515	PF12819, PF13855	IPR001611, IPR024788, IPR032675	down	down
HORVU1Hr1G005100	unknown	undescribed protein	none	none	none			up	up
HORVU1Hr1G005120	MLOC_60208	outer plastid envelope protein 16-1	none	none	none	up	up
HORVU1Hr1G005420	unknown	Dirigent protein 21	none	PF03018	IPR004265	down	down
HORVU1Hr1G005690	unknown	ROTUNDIFOLIA like 17	none	PF08137	IPR012552	up	up
HORVU1Hr1G005730	MLOC_75131	Dehydrogenase/reductase SDR family member 4	GO:0008152, GO:0016491	PF00106	IPR002198, IPR002347, IPR016040	down			down
HORVU1Hr1G006020	MLOC_3125	receptor kinase 1	GO:0004672, GO:0005524, GO:0006468	PF00069	IPR000719, IPR002290, IPR008271, IPR011009, IPR013320, IPR017441	up
HORVU1Hr1G006860	MLOC_61974	Glucose-6-phosphate isomerase	GO:0004347, GO:0006094, GO:0006096	PF00342	IPR001672, IPR018189, IPR023096	down
HORVU1Hr1G007480	MLOC_6194	Bowman-Birk type trypsin inhibitor	GO:0004867, GO:0005576	PF00228	IPR000877	down	down
HORVU1Hr1G007840	MLOC_150	Cytochrome P450 superfamily protein	GO:0005506, GO:0016705, GO:0020037, GO:0055114	PF00067	IPR001128, IPR002401, IPR017972	down	down		down
HORVU1Hr1G008140	unknown	TSA: Wollemia nobilis Ref_Wollemi_Transcript_13814_1438 transcribed RNA sequence	none	PF06749	IPR009606	down	down
HORVU1Hr1G008540	MLOC_17935	Coffea canephora DH200=94 genomic scaffold, scaffold_71	none	PF08787	IPR013320, IPR014895	down
HORVU1Hr1G009920	MLOC_66404	ABC transporter G family member 5	GO:0005524, GO:0016020, GO:0016887	PF00005, PF01061	IPR003439, IPR003593, IPR013525, IPR017871, IPR027417				up
HORVU1Hr1G010010	MLOC_47402	beta-glucosidase 47	GO:0004553, GO:0005975	PF00232	IPR001360, IPR013781, IPR017853		down
HORVU1Hr1G010020	MLOC_44720	beta glucosidase 46	GO:0004553, GO:0005975	PF00232	IPR001360, IPR013781, IPR017853	down
HORVU1Hr1G010230	MLOC_10766	Defensin-like protein	GO:0006952	PF00304	IPR003614, IPR008176, IPR008177		down
HORVU1Hr1G011660	MLOC_70520	receptor kinase 2	GO:0004672, GO:0005524, GO:0006468	PF00069	IPR000719, IPR002290, IPR008271, IPR011009	down	down
HORVU1Hr1G011930	MLOC_76018	O-methyltransferase 1	GO:0008168, GO:0008171, GO:0046983	PF00891, PF08100	IPR001077, IPR011991, IPR012967, IPR016461, IPR029063	up	up
HORVU1Hr1G012060	MLOC_67967	Chymotrypsin inhibitor	GO:0004867, GO:0009611	PF00280	IPR000864	up	up
HORVU1Hr1G012090	MLOC_58649	Subtilisin-chymotrypsin inhibitor CI-1B	GO:0004867, GO:0009611	PF00280	IPR000864		down
HORVU1Hr1G012190	unknown	Disease resistance protein	GO:0043531	PF00931	IPR002182, IPR027417, IPR032675	down
HORVU1Hr1G012690	MLOC_44095	Tetraspanin family protein	GO:0016021	PF00335	IPR000301, IPR018499			up
HORVU1Hr1G013680	MLOC_77043	Glutelin type-B 5	GO:0045735	PF00190	IPR006044, IPR006045, IPR011051, IPR014710				down
HORVU1Hr1G013820	MLOC_70053	isovaleryl-CoA-dehydrogenase	GO:0003995, GO:0008152, GO:0016627, GO:0050660, GO:0055114	PF00441, PF02770, PF02771	IPR006089, IPR006091, IPR009075, IPR009100, IPR013786	up		up
HORVU1Hr1G014570	MLOC_9872	Phosphoinositide phospholipase C 2	GO:0004435, GO:0005515, GO:0006629, GO:0007165, GO:0008081, GO:0035556	PF00168, PF00387, PF00388	IPR000008, IPR000909, IPR001192, IPR001711, IPR017946	up	up
HORVU1Hr1G015050	unknown	Protein kinase superfamily protein	none	none	IPR032675			down
HORVU1Hr1G015060	MLOC_23473	Chaperone protein DnaJ	none	PF00226	IPR001623, IPR018253			up
HORVU1Hr1G015770	MLOC_74060	receptor kinase 2	GO:0004672, GO:0005524, GO:0006468	PF07714	IPR000719, IPR001245, IPR002290, IPR008271, IPR011009, IPR013320, IPR017441			up
HORVU1Hr1G015940	MLOC_14405	Beta-carotene isomerase D27, chloroplastic	none	PF13225	IPR025114			down
HORVU1Hr1G016660	MLOC_64235	Peroxidase superfamily protein	GO:0004601, GO:0006979, GO:0020037, GO:0055114	PF00141	IPR000823, IPR002016, IPR010255, IPR019793, IPR019794			up	up
HORVU1Hr1G017700	MLOC_60357	Hydrophobic protein LTI6B	GO:0016021	PF01679	IPR000612			up
HORVU1Hr1G017770	MLOC_52044	Auxin-responsive protein IAA4	GO:0005515, GO:0005634, GO:0006355	PF02309	IPR000270, IPR003311	down	down
HORVU1Hr1G018140	MLOC_18586	Dehydrogenase/reductase SDR family member 4	GO:0008152, GO:0016491	PF00106	IPR002198, IPR002347, IPR016040, IPR020904	up	up
HORVU1Hr1G018370	MLOC_1044	undescribed protein	none	none	none	up	up	up	up
HORVU1Hr1G019380	MLOC_7655	HXXXD-type acyl-transferase family protein	GO:0016747	PF02458	IPR003480, IPR023213			up	up
HORVU1Hr1G019530	MLOC_62743	GDSL esterase/lipase	GO:0016788	PF00657	IPR001087, IPR013830	up
HORVU1Hr1G020140	MLOC_58795	Endo-1,3							up
HORVU1Hr1G020240	MLOC_4500	NBS-LRR disease resistance protein homologue	none	none	IPR032675	down	down	down
HORVU1Hr1G020800	MLOC_70399	Peroxidase superfamily protein	GO:0004601, GO:0006979, GO:0020037, GO:0055114	PF00141	IPR000823, IPR002016, IPR010255, IPR019793, IPR019794			down
HORVU1Hr1G021140	MLOC_38769	Glutathione S-transferase family protein	GO:0005515	PF00043, PF02798	IPR004045, IPR004046, IPR010987, IPR012336	down
HORVU1Hr1G021990	MLOC_61611	XH/XS domain-containing protein	GO:0031047	PF03468, PF03469, PF03470	IPR005379, IPR005380, IPR005381	down
HORVU1Hr1G022020	MLOC_75000	alpha/beta-Hydrolases superfamily protein	GO:0006629	PF01764	IPR002921, IPR029058		down
HORVU1Hr1G022550	MLOC_1615	Ethylene receptor 1	GO:0000155, GO:0005515, GO:0007165, GO:0016310, GO:0016772	PF00512, PF01590, PF02518	IPR003018, IPR003594, IPR003661, IPR004358, IPR005467, IPR029016			down
HORVU1Hr1G022660	MLOC_49486	Chlororespiratory reduction31	none	PF11623	IPR021659	up	up
HORVU1Hr1G023260	MLOC_11220	Adenine nucleotide alpha hydrolases-like superfamily protein	GO:0006950	PF00582	IPR006015, IPR006016, IPR014729	up		up
HORVU1Hr1G023460	unknown	gibberellin 2-oxidase 6	GO:0016491, GO:0055114	PF03171	IPR005123, IPR027443	down	down
HORVU1Hr1G024860	MLOC_72347	arabinogalactan protein 16	none	PF06376	IPR009424		down
HORVU1Hr1G024870	MLOC_58041	Glycerophosphodiester phosphodiesterase 1	GO:0006629, GO:0008081	PF03009	IPR017946, IPR030395			down	down
HORVU1Hr1G025440	MLOC_37416	Embryo-specific protein 3, (ATS3)	GO:0005515	PF06232	IPR001024, IPR010417	up	up	up	up
HORVU1Hr1G026520	MLOC_58064	HXXXD-type acyl-transferase family protein	GO:0016747	PF02458	IPR003480, IPR023213				down
HORVU1Hr1G028200	MLOC_57896	hexokinase 2	GO:0001678, GO:0004396, GO:0005524, GO:0005536, GO:0005975, GO:0016773, GO:0046835	PF00349, PF03727	IPR001312, IPR022672, IPR022673				down
HORVU1Hr1G029850	MLOC_58690	calmodulin like 23	GO:0005509	PF13499	IPR002048, IPR011992, IPR018247				up
HORVU1Hr1G029920	MLOC_79077	Bidirectional sugar transporter N3	GO:0016021	PF03083	IPR004316		down
HORVU1Hr1G030190	MLOC_1520	Serine/threonine-protein kinase 38	none	none	none			up
HORVU1Hr1G030740	MLOC_75638	Lysine-specific demethylase 5A	GO:0005634	PF02373, PF02928, PF05964, PF05965	IPR003347, IPR003888, IPR003889, IPR004198			down
HORVU1Hr1G031270	MLOC_15501	DNA ligase IV	none	none	none		down	down
HORVU1Hr1G035720	MLOC_44795	ribulose bisphosphate carboxylase small chain 1A	none	PF00101, PF12338	IPR000894, IPR024680, IPR024681	up	up
HORVU1Hr1G037110	MLOC_40599	unknown function	none	none	none		down
HORVU1Hr1G037550	MLOC_34316	RING finger protein 141	GO:0005515, GO:0008270	PF13920	IPR001841, IPR013083		down
HORVU1Hr1G038330	MLOC_79084	3-ketoacyl-CoA thiolase	GO:0003824, GO:0008152, GO:0016747	PF00108, PF02803	IPR002155, IPR016039, IPR020610, IPR020613, IPR020615, IPR020616, IPR020617	down
HORVU1Hr1G038500	MLOC_61024	Xyloglucan galactosyltransferase KATAMARI1 homolog	none	PF03016	IPR004263		down
HORVU1Hr1G039250	MLOC_66568	cellulose synthase A4	GO:0016020, GO:0016760, GO:0030244	PF03552	IPR005150	down	down
HORVU1Hr1G039720	MLOC_20817	Protein NRT1/ PTR FAMILY 5.2	GO:0005215, GO:0006810, GO:0016020	PF00854	IPR000109, IPR020846	down	down
HORVU1Hr1G039820	MLOC_11693	Fatty acid hydroxylase superfamily	GO:0005506, GO:0006633, GO:0016491, GO:0055114	PF04116, PF12076	IPR006694, IPR021940				up
HORVU1Hr1G039830	MLOC_72181	Fatty acid hydroxylase superfamily	GO:0005506, GO:0006633, GO:0016491, GO:0055114	PF04116, PF12076	IPR006694, IPR021940			up	up
HORVU1Hr1G040420	unknown	3-ketoacyl-CoA synthase 12	GO:0003824, GO:0006633, GO:0008152, GO:0008610, GO:0016020, GO:0016747	PF08392, PF08541	IPR012392, IPR013601, IPR013747, IPR016039		down
HORVU1Hr1G040700	MLOC_55464	Protein kinase superfamily protein	none	PF03109	IPR004147		down
HORVU1Hr1G042210	MLOC_52643	Ribosomal protein-like	none	none	none		down
HORVU1Hr1G042250	MLOC_60326	Protein of unknown function, DUF547	GO:0009055, GO:0015035, GO:0035556, GO:0045454	PF00462, PF00610, PF04784	IPR000591, IPR002109, IPR006869, IPR011991, IPR012336			down	down
HORVU1Hr1G043380	MLOC_17883	Cotton fiber expressed protein-like protein	none	PF05553	IPR008480				down
HORVU1Hr1G043710	MLOC_17774	Protein of unknown function (DUF789)	none	PF05623	IPR008507			down
HORVU1Hr1G043820	MLOC_1587	alpha-galactosidase 2	GO:0003824, GO:0004553, GO:0005975	PF16499	IPR000111, IPR002241, IPR013780, IPR013785, IPR017853		down
HORVU1Hr1G043830	MLOC_15778	alpha-galactosidase 1	GO:0003824, GO:0004553, GO:0005975	PF16499	IPR000111, IPR002241, IPR013780, IPR013785, IPR017853	up	up
HORVU1Hr1G043890	MLOC_51183	Aquaporin-like superfamily protein	GO:0005215, GO:0006810, GO:0016020	PF00230	IPR000425, IPR022357, IPR023271	up	up
HORVU1Hr1G043910	MLOC_72498	Plant basic secretory protein (BSP) family protein	none	PF04450	IPR007541	down	down		down
HORVU1Hr1G045700	MLOC_76558	HXXXD-type acyl-transferase family protein	GO:0016747	PF02458	IPR003480, IPR023213	down	down	down	down
HORVU1Hr1G046370	MLOC_79196	Non-specific lipid-transfer protein 2	none	PF14368	IPR016140	down	down
HORVU1Hr1G046400	MLOC_79437	Non-specific lipid-transfer protein 2	none	PF14368	IPR016140	down	down
HORVU1Hr1G046940	MLOC_14207	Trihelix transcription factor GT-2	GO:0003677	PF13837	IPR001005, IPR009057, IPR017877				up
HORVU1Hr1G047570	unknown	undescribed protein	none	none	none		down
HORVU1Hr1G048580	MLOC_71014	Protein kinase superfamily protein	GO:0004672, GO:0005524, GO:0006468	PF00069	IPR000719, IPR002290, IPR008271, IPR011009, IPR017441	up	up
HORVU1Hr1G048760	MLOC_70447	ARM repeat superfamily protein	GO:0005488, GO:0005515	PF00514	IPR000225, IPR011989, IPR016024				up
HORVU1Hr1G049070	MLOC_36602	Glutathione S-transferase family protein	GO:0005515	PF00043, PF13417	IPR004045, IPR004046, IPR010987, IPR012336		up	up
HORVU1Hr1G049250	MLOC_19863	Glutathione S-transferase family protein	GO:0005515	PF13410, PF13417	IPR004045, IPR010987, IPR012336			up
HORVU1Hr1G049270	MLOC_65260	Glutathione S-transferase family protein	GO:0005515	PF13410, PF13417	IPR004045, IPR010987, IPR012336		up	up	up
HORVU1Hr1G049280	MLOC_1690	Glutathione S-transferase family protein	GO:0005515	PF13410, PF13417	IPR004045, IPR010987, IPR012336				down
HORVU1Hr1G049810	MLOC_2499	Mitochondrial ribosome-associated GTPase 1	GO:0005525	PF01926	IPR006073, IPR023179, IPR027417	up	up
HORVU1Hr1G050830	MLOC_53979	dihydroflavonol 4-reductase-like1	GO:0003824, GO:0050662	PF01370	IPR001509, IPR016040			up	up
HORVU1Hr1G050960	MLOC_44162	Inactive poly [ADP-ribose] polymerase RCD1	GO:0003950	PF12174	IPR012317, IPR022003				up
HORVU1Hr1G051150	MLOC_65770	Antiholin-like protein LrgB	none	PF04172	IPR007300		up
HORVU1Hr1G051160	MLOC_65770	Antiholin-like protein LrgB	none	PF04172	IPR007300		up	down
HORVU1Hr1G051260	MLOC_71477	WRKY DNA-binding protein 35	GO:0003700, GO:0006355, GO:0043565	PF03106	IPR003657	down	down	down
HORVU1Hr1G051450	MLOC_21938	Urea active transporter	GO:0005215, GO:0006810, GO:0016020, GO:0055085	PF00474	IPR001734	down
HORVU1Hr1G051510	MLOC_70710	Sec14p-like phosphatidylinositol transfer family protein	GO:0006810, GO:0016021	PF00650, PF03765	IPR001251, IPR009038, IPR011074		down
HORVU1Hr1G052180	MLOC_37570	Metallothionein-like protein 4B	GO:0008270	PF02068	IPR000316	up	up
HORVU1Hr1G052430	MLOC_65311	Chitinase family protein	GO:0004568, GO:0005975, GO:0006032, GO:0016998	PF00182	IPR000726, IPR016283, IPR023346	down	down		down
HORVU1Hr1G053440	MLOC_67213	Proline dehydrogenase 2, mitochondrial	none	PF01619	IPR002872, IPR029041	down	down	down
HORVU1Hr1G054240	MLOC_70189	expansin B2	GO:0005576, GO:0019953	PF01357, PF03330	IPR005795, IPR007112, IPR007117, IPR007118, IPR009009		down	up	up
HORVU1Hr1G054620	MLOC_57456	SH2 domain protein B	none	none	IPR000980, IPR013320		down
HORVU1Hr1G055000	unknown	Pleckstrin (PH) domain-containing protein isoform 4	none	PF06101	IPR009291	up	up
HORVU1Hr1G055340	unknown	Protein kinase superfamily protein	GO:0004672, GO:0005524, GO:0006468	PF00069	IPR000719, IPR002290, IPR008271, IPR011009, IPR017441		up
HORVU1Hr1G055510	MLOC_74094	Protein kinase superfamily protein	none	none	IPR011009			up
HORVU1Hr1G055930	MLOC_54921	homeobox-leucine zipper protein 4	GO:0003677, GO:0003700, GO:0005634, GO:0006355, GO:0043565	PF00046, PF02183, PF04618	IPR001356, IPR003106, IPR006712, IPR009057, IPR017970	up	up
HORVU1Hr1G056090	MLOC_3095	Ethylene-responsive transcription factor 4	GO:0003677, GO:0003700, GO:0006355	PF00847	IPR001471, IPR016177			up	up
HORVU1Hr1G056260	MLOC_6353	unknown protein				down	down
HORVU1Hr1G056560	MLOC_52165	NAD kinase 1	GO:0003951, GO:0006741, GO:0008152, GO:0019674	PF01513	IPR002504, IPR016064, IPR017437, IPR017438	up	up	up
HORVU1Hr1G056630	MLOC_17902	UDP-glucose 4-epimerase	GO:0003824, GO:0050662	PF01370	IPR001509, IPR016040				up
HORVU1Hr1G057410	MLOC_69777	calmodulin like 23	GO:0005509	PF13499	IPR002048, IPR011992, IPR018247			up	up
HORVU1Hr1G057540	unknown	undescribed protein	none	none	none	up
HORVU1Hr1G057940	MLOC_57758	diacylglycerol kinase 2	GO:0004143, GO:0007205, GO:0016301, GO:0035556	PF00130, PF00609, PF00781	IPR000756, IPR001206, IPR002219, IPR016064	up	up
HORVU1Hr1G058150	MLOC_68443	Protein kinase superfamily protein	GO:0004672, GO:0005524, GO:0006468	PF07714	IPR000719, IPR001245, IPR011009, IPR013320, IPR017441		down
HORVU1Hr1G058490	MLOC_15067	Histone superfamily protein	GO:0000786, GO:0003677, GO:0046982	PF00125	IPR000164, IPR007125, IPR009072			up	up
HORVU1Hr1G058630	MLOC_5111	Phytochrome A-associated F-box protein	GO:0005515	none	IPR001810		down
HORVU1Hr1G059530	unknown	undescribed protein	none	none	none	down	down
HORVU1Hr1G059870	MLOC_24874	Late embryogenesis abundant protein D-19	none	PF00477	IPR000389, IPR022377	up	up	up	up
HORVU1Hr1G059900	MLOC_24874	Late embryogenesis abundant protein D-19	none	PF00477	IPR000389, IPR022377	up	up
HORVU1Hr1G060710	unknown	Histone-lysine N-methyltransferase	none	none	none	up			up
HORVU1Hr1G060920	MLOC_51215	Leucine-rich repeat receptor-like protein kinase family protein	GO:0005515	PF00560, PF08263	IPR001611, IPR013210, IPR032675			up	up
HORVU1Hr1G060960	MLOC_69340	Pyrimidine-specific ribonucleoside hydrolase RihA	none	PF01156	IPR001910			down	down
HORVU1Hr1G061080	unknown	undescribed protein	none	none	none		down
HORVU1Hr1G061090	MLOC_11359	Cytochrome P450 superfamily protein	GO:0005506, GO:0016705, GO:0020037, GO:0055114	PF00067	IPR001128, IPR002401				down
HORVU1Hr1G061170	MLOC_58153	L-gulonolactone oxidase 5	GO:0003824, GO:0003885, GO:0016020, GO:0016491, GO:0016614, GO:0050660, GO:0055114	PF01565, PF04030	IPR006094, IPR007173, IPR010030, IPR016166, IPR016167, IPR016169		down
HORVU1Hr1G062190	MLOC_51602	Sister chromatid cohesion 1 protein 1	GO:0000228, GO:0005515	PF04824, PF04825	IPR006909, IPR006910, IPR011991, IPR023093			up
HORVU1Hr1G062270	MLOC_62210	kinesin 4	GO:0003777, GO:0005524, GO:0007018, GO:0008017	PF00225	IPR001752, IPR019821, IPR027417				down
HORVU1Hr1G062340	MLOC_20680	Protein translocase subunit SecY	GO:0015031, GO:0016020	PF00344	IPR002208, IPR023201				up
HORVU1Hr1G062380	MLOC_52613	CASP-like protein 1	none	PF04535	IPR006459, IPR006702				down
HORVU1Hr1G062500	MLOC_45138	BnaA10g16000D protein	none	none	none			up	up
HORVU1Hr1G063150	MLOC_14273	unknown function	none	none	none	up	up		up
HORVU1Hr1G063250	MLOC_47751	Phospholipase A1-II 1	GO:0006629	PF01764	IPR002921, IPR029058			down	down
HORVU1Hr1G063420	MLOC_10689	Protein NRT1/ PTR FAMILY 3.1	GO:0005215, GO:0006810, GO:0016020	PF00854	IPR000109, IPR020846			up	up
HORVU1Hr1G063560	MLOC_58044	H(+)-ATPase 1	GO:0000166, GO:0006754, GO:0016021, GO:0016887, GO:0046872	PF00122, PF00690, PF00702	IPR001757, IPR004014, IPR006534, IPR008250, IPR018303, IPR023214, IPR023298, IPR023299		down
HORVU1Hr1G063740	MLOC_63743	NAC domain protein,	GO:0003677, GO:0006355	PF02365	IPR003441	up	up	up	up
HORVU1Hr1G064070	MLOC_73066	receptor-like protein kinase 2	GO:0004672, GO:0005524, GO:0006468	PF00069	IPR000719, IPR002290, IPR008271, IPR011009, IPR013320, IPR017441, IPR032675		up
HORVU1Hr1G065100	MLOC_1614	Bidirectional sugar transporter N3	GO:0016021	PF03083	IPR004316	up	up
HORVU1Hr1G065290	MLOC_36885	beta-galactosidase 16	GO:0004553, GO:0005975, GO:0030246	PF01301, PF02140	IPR000922, IPR001944, IPR008979, IPR013781, IPR017853, IPR019801, IPR031330	up	up		up
HORVU1Hr1G065630	MLOC_71416	undescribed protein	GO:0004867, GO:0005576	none	IPR000877	down	down
HORVU1Hr1G065660	MLOC_71416	undescribed protein	GO:0004867, GO:0005576	none	IPR000877		down
HORVU1Hr1G066020	MLOC_73922	cyclic nucleotide-gated channel 14	none	PF00027	IPR000595, IPR014710, IPR018490	up	up
HORVU1Hr1G066090	MLOC_57544	GDSL esterase/lipase	GO:0016788	PF00657	IPR001087, IPR013830			down
HORVU1Hr1G066100	MLOC_65893	Adenine nucleotide alpha hydrolases-like superfamily protein	GO:0006950	PF00582	IPR006015, IPR006016, IPR014729	up		up
HORVU1Hr1G066830	unknown	DNA mismatch repair protein MutS	GO:0005524, GO:0006298, GO:0030983	PF05192	IPR007696		down
HORVU1Hr1G067080	MLOC_47741	Early light-induced protein, chloroplastic	none	PF00504	IPR022796, IPR023329	up	up
HORVU1Hr1G067140	MLOC_65313	Structural maintenance of chromosomes protein 4	GO:0005515, GO:0005524, GO:0005694, GO:0051276	PF02463, PF06470	IPR003395, IPR010935, IPR024704, IPR027417			down
HORVU1Hr1G067300	MLOC_76055	phosphoglycerate kinase 1	GO:0004618, GO:0006096	PF00162	IPR001576, IPR015824, IPR015901, IPR015911			up
HORVU1Hr1G067460	MLOC_44074	Glucan endo-1,3-beta-glucosidase	GO:0004553, GO:0005975	PF00332	IPR000490, IPR013781, IPR017853		down
HORVU1Hr1G067550	MLOC_57003	calcium-transporting ATPase, putative	GO:0000166, GO:0005388, GO:0005516, GO:0005524, GO:0016020, GO:0016021, GO:0046872, GO:0070588	PF00122, PF00689, PF00690, PF12515, PF12710	IPR001757, IPR004014, IPR006068, IPR006408, IPR008250, IPR018303, IPR023214, IPR023298, IPR023299, IPR024750				down
HORVU1Hr1G067660	unknown	undescribed protein	none	none	none				down
HORVU1Hr1G067980	MLOC_72810	Cysteine proteinase inhibitor	GO:0004869	PF00031	IPR000010, IPR018073, IPR020381	up
HORVU1Hr1G068020	MLOC_75745	Aldehyde dehydrogenase family 2 member C4	GO:0008152, GO:0016491, GO:0016620, GO:0055114	PF00171	IPR015590, IPR016160, IPR016161, IPR016162, IPR016163, IPR029510	down		down
HORVU1Hr1G069550	unknown	Thioredoxin superfamily protein	GO:0045454	PF00085	IPR012336, IPR013766			down	up
HORVU1Hr1G069620	MLOC_5971	WRKY DNA-binding protein 54	GO:0003700, GO:0006355, GO:0043565	PF03106	IPR003657		down
HORVU1Hr1G069800	MLOC_63383	Non-specific lipid-transfer protein	GO:0006869, GO:0008289	PF00234	IPR000528, IPR016140	down	down		down
HORVU1Hr1G069830	MLOC_63724	expansin A1	GO:0005576, GO:0009664	PF01357, PF03330	IPR002963, IPR007112, IPR007117, IPR007118, IPR009009			down	down
HORVU1Hr1G069840	MLOC_56623	novel plant snare 13	none	none	none			up
HORVU1Hr1G070190	MLOC_36462	Nodulin-like / Major Facilitator Superfamily protein	none	PF06813	IPR010658, IPR020846			down	down
HORVU1Hr1G070220	MLOC_57145	alanine:glyoxylate aminotransferase 3	GO:0003824, GO:0008483, GO:0030170	PF00202	IPR005814, IPR015421, IPR015422, IPR015424	up		up	up
HORVU1Hr1G070310	MLOC_54711	Aldose reductase	GO:0016491, GO:0055114	PF00248	IPR018170, IPR020471, IPR023210	up	up	up
HORVU1Hr1G070360	MLOC_68959	PRA1 (Prenylated rab acceptor) family protein	none	PF03208	IPR004895				down
HORVU1Hr1G070580	MLOC_73696	receptor-like kinase 902	GO:0004672, GO:0005515, GO:0005524, GO:0006468	PF07714, PF08263, PF13855	IPR000719, IPR001245, IPR001611, IPR011009, IPR013210, IPR013320, IPR032675				down
HORVU1Hr1G071430	MLOC_24040	unknown function	none	none	none	up		down	down
HORVU1Hr1G071620	MLOC_36879	Nuclear transcription factor Y subunit B	GO:0005634, GO:0006355, GO:0043565, GO:0046982	PF00808	IPR003956, IPR003958, IPR009072	up
HORVU1Hr1G071910	MLOC_56230	Plant protein 1589 of unknown function	none	PF09713	IPR006476			down	down
HORVU1Hr1G072180	MLOC_62417	Riboflavin biosynthesis protein RibBA	GO:0003935, GO:0008686, GO:0009231	PF00925, PF00926	IPR000422, IPR000926, IPR017945, IPR032677			up
HORVU1Hr1G072470	MLOC_69899	laccase 17	GO:0005507, GO:0016491, GO:0046274, GO:0048046, GO:0052716, GO:0055114	PF00394, PF07731, PF07732	IPR001117, IPR002355, IPR008972, IPR011706, IPR011707, IPR017761	down		down	down
HORVU1Hr1G072530	MLOC_22174	laccase 17	GO:0005507, GO:0016491, GO:0046274, GO:0048046, GO:0052716, GO:0055114	PF00394, PF07731, PF07732	IPR001117, IPR008972, IPR011706, IPR011707, IPR017761	down	down
HORVU1Hr1G072590	MLOC_75580	glycerol-3-phosphate acyltransferase 7	none	none	none			up	up
HORVU1Hr1G072640	MLOC_74619	Tetratricopeptide repeat (TPR)-like superfamily protein	GO:0005515	none	IPR011990	up	up
HORVU1Hr1G072780	MLOC_57545	Gamma-glutamyl phosphate reductase	GO:0003824, GO:0004349, GO:0004350, GO:0005737, GO:0006561, GO:0008152, GO:0016491, GO:0016620, GO:0055114	PF00171, PF00696	IPR000965, IPR001048, IPR001057, IPR005715, IPR005766, IPR015590, IPR016161, IPR016162, IPR016163, IPR019797			up
HORVU1Hr1G072810	MLOC_14838	Transcription factor ILR3	GO:0046983	PF00010	IPR011598			down
HORVU1Hr1G072890	MLOC_5765	unknown function	none	none	none			down	down
HORVU1Hr1G072910	MLOC_51507	ROP guanine nucleotide exchange factor 5	GO:0005089	PF03759	IPR005512			down	down
HORVU1Hr1G072990	MLOC_19862	guanylyl cyclase 1	none	PF09778	IPR018616			up	up
HORVU1Hr1G073010	MLOC_70343	unknown function	none	none	none			down
HORVU1Hr1G073150	MLOC_68918	O-fucosyltransferase family protein	none	PF10250	IPR019378		up
HORVU1Hr1G073170	MLOC_53966	LSD1 zinc finger family protein	none	PF06943	IPR005735			down
HORVU1Hr1G073700	MLOC_34007	Cytochrome P450 superfamily protein	GO:0005506, GO:0016705, GO:0020037, GO:0055114	PF00067	IPR001128, IPR002401			down	down
HORVU1Hr1G073820	MLOC_57283	Glucan endo-1,3-beta-glucosidase 14	GO:0004553, GO:0005975	PF00332	IPR000490, IPR013781, IPR017853	down
HORVU1Hr1G073840	MLOC_57285	ferredoxin 3	GO:0009055, GO:0022900, GO:0051536, GO:0051537	PF00111	IPR001041, IPR006058, IPR010241, IPR012675		down	down
HORVU1Hr1G074060	MLOC_36786	serine/threonine protein kinase 2	GO:0004672, GO:0005524, GO:0006468	PF00069	IPR000719, IPR002290, IPR008271, IPR011009, IPR017441			down
HORVU1Hr1G074550	MLOC_11789	Protein NRT1/ PTR FAMILY 5.10	GO:0005215, GO:0006810, GO:0006857, GO:0016020	PF00854	IPR000109, IPR018456, IPR020846	down	down
HORVU1Hr1G075160	MLOC_68567	Isoflavone reductase-like protein	none	PF05368	IPR008030, IPR016040		down	down
HORVU1Hr1G075580	MLOC_1248	oxidative stress 3 .	none	none	none	up	up
HORVU1Hr1G075620	MLOC_58493	ABC transporter ATP-binding protein NatA	GO:0005524, GO:0016887	PF00005, PF12698	IPR003439, IPR003593, IPR017871, IPR027417	down
HORVU1Hr1G075640	MLOC_74648	ABC transporter ATP-binding protein NatA	GO:0005524, GO:0016887	PF00005, PF12698	IPR003439, IPR003593, IPR017871, IPR027417	down
HORVU1Hr1G075760	MLOC_71338	Peroxidase 2	GO:0004601, GO:0006979, GO:0020037, GO:0055114	PF00141	IPR000823, IPR002016, IPR010255, IPR019793, IPR019794	down
HORVU1Hr1G075860	MLOC_37134	pectinesterase 11	GO:0005618, GO:0030599, GO:0042545	PF01095	IPR000070, IPR011050, IPR012334, IPR018040	down	down
HORVU1Hr1G076190	MLOC_72624	Chaperone protein ClpB	GO:0005524, GO:0019538	PF00004, PF02861, PF07724, PF10431	IPR001270, IPR003593, IPR003959, IPR004176, IPR018368, IPR019489, IPR027417, IPR028299	up	up	up	up
HORVU1Hr1G076420	MLOC_38783	RNA ligase/cyclic nucleotide phosphodiesterase family protein	GO:0004112	PF07823	IPR009097, IPR012386			down	down
HORVU1Hr1G076650	MLOC_38478	O-methyltransferase family protein	GO:0008168, GO:0008171, GO:0046983	PF00891, PF08100	IPR001077, IPR011991, IPR012967, IPR016461, IPR029063	down	down
HORVU1Hr1G076660	MLOC_37601	O-methyltransferase family protein	GO:0008168, GO:0008171, GO:0046983	PF00891, PF08100	IPR001077, IPR011991, IPR012967, IPR016461, IPR022657, IPR029063	down	down
HORVU1Hr1G077350	MLOC_63702	receptor serine/threonine kinase, putative	none	none	IPR011009		down
HORVU1Hr1G077770	MLOC_62654	Outer envelope protein 80, chloroplastic	GO:0019867	PF01103	IPR000184	down	down
HORVU1Hr1G077820	MLOC_72444	Poly [ADP-ribose] polymerase 3	GO:0003950, GO:0006471	PF00533, PF00644, PF02877, PF05406, PF08063	IPR001357, IPR004102, IPR008893, IPR012317, IPR012982	up	up
HORVU1Hr1G078050	MLOC_75387	Agglutinin isolectin 3	GO:0008061	PF00187	IPR001002, IPR018371	up
HORVU1Hr1G078480	MLOC_72322	Histone H2B.2	GO:0000786, GO:0003677, GO:0046982	PF00125	IPR000558, IPR007125, IPR009072	up
HORVU1Hr1G078680	MLOC_6461	mitogen-activated protein kinase kinase kinase 18	GO:0004672, GO:0005524, GO:0006468	PF00069	IPR000719, IPR011009	up	up	up	up
HORVU1Hr1G078710	MLOC_6461	Protein kinase superfamily protein	GO:0004672, GO:0005524, GO:0006468	PF00069	IPR000719, IPR002290, IPR008271, IPR011009			up	up
HORVU1Hr1G079030	MLOC_59184	myb domain protein 86	GO:0003677	PF00249	IPR001005, IPR009057, IPR017930			up	up
HORVU1Hr1G079150	MLOC_61826	phospholipase D P2	GO:0003824, GO:0004630, GO:0005509, GO:0005515, GO:0016020, GO:0046470	PF00168, PF00614, PF12357, PF13091	IPR000008, IPR001736, IPR011402, IPR024632, IPR025202		down	down	down
HORVU1Hr1G079280	MLOC_77777	Late embryogenesis abundant protein 76	none	PF02987	IPR004238	up	up
HORVU1Hr1G079380	MLOC_59275	alpha/beta-Hydrolases superfamily protein	none	PF00561	IPR000073, IPR029058			up	up
HORVU1Hr1G080080	MLOC_39235	sulfotransferase 16	GO:0008146	PF00685	IPR000863, IPR027417	up	up	up	up
HORVU1Hr1G080160	MLOC_34549	cyclin-dependent kinase B2							up
HORVU1Hr1G080190	MLOC_22815	Histone superfamily protein	GO:0000786, GO:0003677, GO:0046982	none	IPR000164, IPR009072			up
HORVU1Hr1G080300	MLOC_10264	WRKY DNA-binding protein 51	GO:0003700, GO:0006355, GO:0043565	PF03106	IPR003657				down
HORVU1Hr1G080600	MLOC_73333	Serine/threonine-protein kinase	GO:0004672, GO:0005524, GO:0006468, GO:0048544	PF00069, PF00954	IPR000719, IPR000858, IPR002290, IPR003609, IPR008271, IPR011009, IPR013320, IPR017441	down	down
HORVU1Hr1G080640	MLOC_10564	rapid alkalinization factor 23	none	PF05498	IPR008801		down
HORVU1Hr1G081140	MLOC_60948	Pistil-specific extensin-like protein	none	PF01190	none	down	down
HORVU1Hr1G081300	MLOC_11286	Heat stress transcription factor A-4d	GO:0003700, GO:0005634, GO:0006355, GO:0043565	PF00447	IPR000232, IPR011991				down
HORVU1Hr1G081490	MLOC_59588	Ubiquitin domain-containing protein	GO:0043130	PF16455	IPR032752	up	up
HORVU1Hr1G081570	MLOC_32433	WRKY DNA-binding protein 24	GO:0003700, GO:0006355, GO:0043565	PF03106	IPR003657	up	up
HORVU1Hr1G082010	MLOC_26028	Reticulon family protein	none	PF02453	IPR003388	up		up
HORVU1Hr1G082670	MLOC_38822	AP2/B3 transcription factor family protein	GO:0003677, GO:0003700, GO:0006355	PF00847, PF02362	IPR001471, IPR003340, IPR015300, IPR016177	down	down		down
HORVU1Hr1G082820	MLOC_82118	unknown function	none	none	none	up	up
HORVU1Hr1G083130	MLOC_73895	GDP-D-mannose 4,6-dehydratase 1	none	PF16363	IPR016040	down	down
HORVU1Hr1G083160	MLOC_77338	Non-specific lipid-transfer protein 2	none	PF14368	IPR016140			up	up
HORVU1Hr1G083180	MLOC_52372	Non-specific lipid-transfer protein 2	none	PF14368	IPR016140	up	up	up	up
HORVU1Hr1G083420	MLOC_498	Heat stress transcription factor A-2c	GO:0003700, GO:0005634, GO:0006355, GO:0043565	PF00447	IPR000232, IPR011991			up	up
HORVU1Hr1G083710	MLOC_56536	Guanine nucleotide-binding protein subunit beta-like protein A	GO:0005515	PF00400	IPR001680, IPR015943, IPR017986, IPR019775, IPR020472		down	down
HORVU1Hr1G083810	MLOC_59075	65-kDa microtubule-associated protein 3	GO:0000226, GO:0000910, GO:0008017	PF03999	IPR007145			down
HORVU1Hr1G084020	MLOC_18121	Rust resistance Rp1-D-like protein	GO:0043531	PF00931	IPR002182, IPR027417		down
HORVU1Hr1G084390	MLOC_65304	GDSL esterase/lipase	GO:0016788	PF00657	IPR001087, IPR013830		down
HORVU1Hr1G084560	MLOC_68502	tropinone reductase	GO:0008152, GO:0016491	PF00106	IPR002198, IPR002347, IPR013968, IPR016040, IPR020904	down	down
HORVU1Hr1G084980	MLOC_12630	O-acyltransferase (WSD1-like) family protein	GO:0004144, GO:0045017	PF03007, PF06974	IPR004255, IPR009721, IPR023213			down
HORVU1Hr1G085170	MLOC_38730	60S ribosomal protein L37a	GO:0003735, GO:0005622, GO:0005840, GO:0006412	PF01780	IPR002674, IPR011331, IPR011332	up
HORVU1Hr1G085500	MLOC_74384	Eukaryotic aspartyl protease family protein	GO:0004190, GO:0006508	PF14541, PF14543	IPR001969, IPR021109, IPR032799, IPR032861	up	up	up	up
HORVU1Hr1G086070	MLOC_10203	Auxin-responsive protein IAA19	GO:0005515, GO:0005634, GO:0006355	PF02309	IPR000270, IPR003311			down
HORVU1Hr1G086450	MLOC_67573	pirin	none	PF02678, PF05726	IPR003829, IPR008778, IPR011051, IPR014710			down
HORVU1Hr1G086580	MLOC_15949	BEST Arabidopsis thaliana protein match is: transcription factor-related .	GO:0006351, GO:0043565	PF14144	IPR025422	up	up
HORVU1Hr1G086760	MLOC_17499	3-ketoacyl-CoA synthase 5	GO:0003824, GO:0006633, GO:0008152, GO:0008610, GO:0016020, GO:0016747	PF08392, PF08541	IPR012392, IPR013601, IPR013747, IPR016039	down	down
HORVU1Hr1G086900	MLOC_5613	calmodulin like 43	GO:0005509	PF13499	IPR002048, IPR011992, IPR018247			down	down
HORVU1Hr1G087530	MLOC_65114	FASCICLIN-like arabinogalactan-protein 11	none	PF02469	IPR000782, IPR006311			up
HORVU1Hr1G087570	MLOC_76349	FASCICLIN-like arabinogalactan 6	none	PF02469	IPR000782			up	up
HORVU1Hr1G087630	MLOC_65812	Glutaredoxin family protein	GO:0009055, GO:0015035, GO:0045454	PF00462	IPR002109, IPR011905, IPR012336				up
HORVU1Hr1G088010	MLOC_76711	Cytochrome b561 domain-containing protein	GO:0016021	PF03188	IPR004877, IPR006593	down	down
HORVU1Hr1G088270	MLOC_48231	IMP dehydrogenase/GMP reductase	GO:0003824	PF04481	IPR007570, IPR013785				up
HORVU1Hr1G088590	MLOC_53905	Ribosome maturation factor RimM	GO:0005840, GO:0006364, GO:0008152, GO:0043022, GO:0070569	PF01704, PF01782	IPR002618, IPR002676, IPR009000, IPR011033, IPR011961, IPR029044				up
HORVU1Hr1G088620	MLOC_43794	Xylanase inhibitor	none	PF14541, PF14543	IPR021109, IPR032799, IPR032861		down
HORVU1Hr1G088680	MLOC_71125	Receptor-like protein kinase	GO:0004672, GO:0005524, GO:0006468	PF07714, PF12819	IPR000719, IPR001245, IPR002290, IPR008271, IPR011009, IPR013320, IPR017441, IPR024788			down	down
HORVU1Hr1G088840	MLOC_58691	Phospholipase A1-II 7	GO:0006629	PF01764	IPR002921, IPR029058	down	down
HORVU1Hr1G089240	unknown	Cytochrome c oxidase subunit 1	GO:0004129, GO:0005506, GO:0009055, GO:0009060, GO:0016021, GO:0020037, GO:0055114	PF00115	IPR000883, IPR023616				up
HORVU1Hr1G089680	MLOC_10049	sugar transporter 1	GO:0005215, GO:0016020, GO:0016021, GO:0022857, GO:0022891, GO:0055085	PF00083	IPR003663, IPR005828, IPR005829, IPR020846	down
HORVU1Hr1G089730	MLOC_14214	Iron-sulfur cluster assembly protein 1	GO:0005506, GO:0016226, GO:0051536	PF01592	IPR002871, IPR011339	up	up	up	up
HORVU1Hr1G090030	MLOC_6711	G-box binding factor 2	GO:0003700, GO:0006355, GO:0043565	PF00170, PF07777, PF16596	IPR004827, IPR012900	up	up
HORVU1Hr1G090130	MLOC_17779	WRKY DNA-binding protein 30	GO:0003700, GO:0006355, GO:0043565	PF03106	IPR003657			up
HORVU1Hr1G090250	MLOC_53577	Ethylene-responsive transcription factor 1	GO:0003677, GO:0003700, GO:0006355	PF00847	IPR001471, IPR016177	up	up	up	up
HORVU1Hr1G090490	MLOC_10676	ketol-acid reductoisomerase	GO:0004455, GO:0009082, GO:0016491, GO:0055114	PF01450, PF07991	IPR000506, IPR008927, IPR013116, IPR013328, IPR016040			up
HORVU1Hr1G090990	MLOC_55589	Protein CHUP1, chloroplastic	GO:0005179, GO:0005576	none	IPR000381	down	down
HORVU1Hr1G091010	MLOC_55590	Oleosin family protein	GO:0012511, GO:0016021	PF01277	IPR000136	up	up
HORVU1Hr1G091230	MLOC_57280	Protein kinase superfamily protein	GO:0004672, GO:0005524, GO:0006468	PF07714	IPR000719, IPR001245, IPR002290, IPR008271, IPR011009	up	up
HORVU1Hr1G091540	MLOC_74184	Transcription factor RADIALIS	GO:0003677	PF00249	IPR001005, IPR009057, IPR017877	down	down	down	down
HORVU1Hr1G091600	MLOC_5173	Glucose-1-phosphate adenylyltransferase family protein	GO:0005978, GO:0008878, GO:0009058, GO:0016779	PF00483	IPR005835, IPR005836, IPR011004, IPR011831, IPR029044			up
HORVU1Hr1G092240	MLOC_10669	Glucan endo-1,3-beta-glucosidase 13	GO:0004553, GO:0005975	PF00332, PF07983	IPR000490, IPR012946, IPR013781, IPR017853	down	down	up
HORVU1Hr1G092250	MLOC_39029	receptor kinase 2	GO:0004672, GO:0005524, GO:0006468	PF00069, PF01657	IPR000719, IPR002290, IPR002902, IPR008271, IPR011009, IPR013320, IPR017441		down		down
HORVU1Hr1G092440	MLOC_62780	P-loop containing nucleoside triphosphate hydrolases superfamily protein	GO:0005524	PF00004	IPR003593, IPR003959, IPR003960, IPR027417		down
HORVU1Hr1G092640	MLOC_18621	S-type anion channel SLAH2	GO:0016021, GO:0055085	PF03595	IPR004695		down	up	up
HORVU1Hr1G092650	MLOC_36556	UDP-Glycosyltransferase superfamily protein	GO:0008152, GO:0016758	PF00201	IPR002213				down
HORVU1Hr1G092670	MLOC_7975	Late embryogenesis abundant protein	GO:0009269	PF03168	IPR004864, IPR013783, IPR013990	up	up
HORVU1Hr1G092790	unknown	undescribed protein	none	none	none	down
HORVU1Hr1G092950	MLOC_58341	Transducin family protein / WD-40 repeat family protein	GO:0005515	PF00400	IPR001680, IPR015943, IPR017986, IPR019775, IPR020472				up
HORVU1Hr1G093180	MLOC_61094	RNA polymerase sigma-B factor	GO:0003677, GO:0003700, GO:0006352, GO:0006355, GO:0016987	PF04539, PF04542, PF04545	IPR000943, IPR007624, IPR007627, IPR007630, IPR011991, IPR013324, IPR013325, IPR014284	up	up
HORVU1Hr1G093490	MLOC_62097	Paired amphipathic helix protein Sin3-like 3	GO:0006355	PF02671, PF08295, PF16879	IPR003822, IPR013194, IPR031693			down
HORVU1Hr1G093890	MLOC_74856	Pathogen-related protein	none	none	IPR032710		up
HORVU1Hr1G094180	MLOC_81630	Sigma factor SigB regulation protein RsbQ	none	none	IPR029058	down	down
HORVU1Hr1G094230	MLOC_16731	calmodulin like 42	GO:0005509	PF00036, PF13202	IPR002048, IPR011992, IPR018247	down
HORVU1Hr1G094610	unknown	undescribed protein	none	none	none	down	down
HORVU1Hr1G094840	MLOC_71450	Protein phosphatase 2C family protein	GO:0003824, GO:0043169	PF00481	IPR000222, IPR001932		down
HORVU1Hr1G095430	MLOC_70713	UDP-glucose 4-epimerase 1	GO:0003978, GO:0006012	PF16363	IPR005886, IPR016040	up	up
HORVU2Hr1G000280	MLOC_69242	cysteine synthase C1	GO:0004124, GO:0006535	PF00291	IPR001216, IPR001926, IPR005856, IPR005859	down
HORVU2Hr1G002020	MLOC_3707	Leucine-rich receptor-like protein kinase family protein	GO:0004672, GO:0005515, GO:0005524, GO:0006468	PF00069, PF08263, PF13855	IPR000719, IPR001611, IPR002290, IPR003591, IPR008271, IPR011009, IPR013210, IPR013320, IPR017441, IPR032675	down
HORVU2Hr1G002440	unknown	laccase 7	GO:0005507, GO:0016491, GO:0055114	PF00394, PF07731, PF07732	IPR001117, IPR008972, IPR011706, IPR011707	up	up
HORVU2Hr1G002500	MLOC_11854	HXXXD-type acyl-transferase family protein	GO:0016747	PF02458	IPR003480, IPR023213	up	up
HORVU2Hr1G002720	unknown	PLANT CADMIUM RESISTANCE 1	none	PF04749	IPR006461	up	up		up
HORVU2Hr1G002750	MLOC_37810	receptor kinase 2	GO:0004672, GO:0005524, GO:0006468	PF00069	IPR000719, IPR002290, IPR008271, IPR011009, IPR013320	down	down
HORVU2Hr1G002840	unknown	receptor-like protein kinase 1	GO:0004672, GO:0005524, GO:0006468, GO:0030246	PF00069, PF00139	IPR000719, IPR001220, IPR002290, IPR008271, IPR011009, IPR013320, IPR019825	down	down	down	down
HORVU2Hr1G002930	MLOC_59629	Pectate lyase family protein	none	PF00544	IPR002022, IPR011050, IPR012334, IPR018082	down	down	down
HORVU2Hr1G003470	MLOC_58632	Cytochrome P450 superfamily protein	GO:0005506, GO:0016705, GO:0020037, GO:0055114	PF00067	IPR001128, IPR002401, IPR017972	up	up		up
HORVU2Hr1G003600	MLOC_10439	Disease resistance protein	GO:0043531	PF00931	IPR002182, IPR027417, IPR032675		down	down
HORVU2Hr1G003640	unknown	Cysteine-rich receptor-like protein kinase 41	none	PF00635	IPR000535, IPR008962		down	down
HORVU2Hr1G004020	MLOC_55294	Amidase family protein	none	none	IPR023631	down	down
HORVU2Hr1G004230	MLOC_45125	12-oxophytodienoate reductase 2	GO:0003824, GO:0010181, GO:0016491, GO:0055114	PF00724	IPR001155, IPR013785			down	down
HORVU2Hr1G004550	MLOC_32991	Cytochrome P450 superfamily protein	GO:0005506, GO:0016705, GO:0020037, GO:0055114	PF00067	IPR001128, IPR002401, IPR017972				down
HORVU2Hr1G004620	MLOC_46367	Copalyl diphosphate synthase 2	GO:0000287, GO:0008152, GO:0010333, GO:0016829	PF01397, PF03936	IPR001906, IPR005630, IPR008930, IPR008949	down		down
HORVU2Hr1G005330	MLOC_65969	HXXXD-type acyl-transferase family protein	GO:0016747	PF02458	IPR003480, IPR023213		down
HORVU2Hr1G005570	MLOC_55350	2-oxoglutarate (2OG) and Fe(II)-dependent oxygenase superfamily protein	GO:0016491, GO:0055114	PF03171, PF14226	IPR005123, IPR026992, IPR027443		down		down
HORVU2Hr1G005600	MLOC_75428	unknown function	none	none	none		up
HORVU2Hr1G005630	MLOC_55792	RING/U-box superfamily protein	GO:0008270	PF12906	IPR011016, IPR013083	up	up
HORVU2Hr1G006360	unknown	Embryogenesis transmembrane protein-like	none	PF13962	IPR026961	down	down
HORVU2Hr1G006540	MLOC_59545	HXXXD-type acyl-transferase family protein	GO:0016747	PF02458	IPR003480, IPR023213	up	up
HORVU2Hr1G006830	MLOC_60736	Cytochrome P450 superfamily protein	GO:0005506, GO:0016705, GO:0020037, GO:0055114	PF00067	IPR001128, IPR002401, IPR017972	down	down
HORVU2Hr1G006910	MLOC_57310	Cytochrome P450 superfamily protein	GO:0005506, GO:0016705, GO:0020037, GO:0055114	PF00067	IPR001128, IPR002401, IPR017972				down
HORVU2Hr1G007070	MLOC_65493	Cyclopropane-fatty-acyl-phospholipid synthase	GO:0016491, GO:0055114	PF01593, PF02353	IPR002937, IPR023753, IPR029063		up
HORVU2Hr1G007170	MLOC_38340	Disease resistance protein	GO:0043531	PF00931	IPR002182, IPR027417, IPR032675			up
HORVU2Hr1G007490	MLOC_45745	flowering promoting factor 1	none	none	none		down	down
HORVU2Hr1G007840	MLOC_51927	60 kDa chaperonin 2	GO:0005524, GO:0005737, GO:0006457, GO:0042026	PF00118	IPR001844, IPR002423, IPR018370, IPR027409, IPR027413				up
HORVU2Hr1G008140	MLOC_72107	receptor kinase 3	GO:0004672, GO:0005524, GO:0006468, GO:0048544	PF00954, PF01453, PF07714, PF08276	IPR000719, IPR000858, IPR001245, IPR001480, IPR002290, IPR003609, IPR008271, IPR011009, IPR017441	down		down	down
HORVU2Hr1G009580	MLOC_5957	ABC transporter C family member 14	GO:0005524, GO:0006810, GO:0016021, GO:0016887, GO:0042626, GO:0055085	PF00005, PF00664	IPR003439, IPR003593, IPR011527, IPR017871, IPR027417	up	up	up
HORVU2Hr1G010690	unknown	ribulose bisphosphate carboxylase small chain 1A	none	PF00101, PF12338	IPR000894, IPR024680, IPR024681	down	down
HORVU2Hr1G010860	MLOC_5009	Rho GTPase-activating protein 2	GO:0007165	PF00620	IPR000095, IPR000198, IPR008936		down
HORVU2Hr1G010970	MLOC_23980	RING/U-box superfamily protein	GO:0005515, GO:0008270	PF13639	IPR001841, IPR013083	down	down		down
HORVU2Hr1G010990	MLOC_56278	Aquaporin-like superfamily protein	GO:0005215, GO:0006810, GO:0016020	PF00230	IPR000425, IPR022357, IPR023271	down
HORVU2Hr1G011060	MLOC_56660	Heavy metal transport/detoxification superfamily protein	GO:0030001, GO:0046872	none	IPR006121			up	up
HORVU2Hr1G011550	MLOC_60943	Endo-1,4-beta-xylanase Z	GO:0004553, GO:0005975	PF00331	IPR001000, IPR008979, IPR013781, IPR017853	up	up
HORVU2Hr1G011990	MLOC_76709	Cystathionine gamma-synthase	GO:0003824, GO:0030170	PF01053	IPR000277, IPR015421, IPR015424	down	down		up
HORVU2Hr1G012630	MLOC_4869	alpha-glucan phosphorylase 2	GO:0004645, GO:0005975, GO:0008184, GO:0030170	PF00343	IPR000811, IPR011833	down
HORVU2Hr1G012790	MLOC_21709	Transketolase	GO:0003824, GO:0004802, GO:0008152	PF00456, PF02779, PF02780	IPR005474, IPR005475, IPR005478, IPR009014, IPR029061	up	up
HORVU2Hr1G012810	MLOC_1260	Cytochrome P450 superfamily protein	GO:0005506, GO:0016705, GO:0020037, GO:0055114	PF00067	IPR001128, IPR002401	down			down
HORVU2Hr1G013450	MLOC_72614	basic helix-loop-helix (bHLH) DNA-binding superfamily protein	GO:0046983	none	IPR011598		up
HORVU2Hr1G013760	MLOC_69399	MLO-like protein 1	GO:0006952, GO:0016021	PF03094	IPR004326	down	down
HORVU2Hr1G014240	MLOC_5859	pinoresinol reductase 1	none	PF05368	IPR008030, IPR016040		down	down
HORVU2Hr1G014550	MLOC_74073	undescribed protein	none	none	none			down
HORVU2Hr1G014590	MLOC_75519	Heat stress transcription factor A-2b	GO:0003700, GO:0005634, GO:0006355, GO:0043565	PF00447	IPR000232, IPR011991	up	up		up
HORVU2Hr1G014900	MLOC_63818	receptor kinase 2	GO:0004672, GO:0005524, GO:0006468, GO:0030246	PF00069, PF00139	IPR000719, IPR001220, IPR002290, IPR008271, IPR011009, IPR013320, IPR017441	down	down		down
HORVU2Hr1G014930	MLOC_39533	receptor lectin kinase	GO:0004672, GO:0005524, GO:0006468, GO:0030246	PF00069, PF00139	IPR000719, IPR001220, IPR002290, IPR008271, IPR011009, IPR013320, IPR017441		down
HORVU2Hr1G015720	MLOC_16176	Hexosyltransferase	GO:0016757	PF01501	IPR002495, IPR029044	up	up
HORVU2Hr1G015940	unknown	cAMP-regulated phosphoprotein 19-related protein	none	PF04667	IPR006760		down	down
HORVU2Hr1G016440	MLOC_44303	Pentatricopeptide repeat-containing protein	GO:0005515	PF01535, PF12854, PF13041	IPR002885, IPR011990	up	up
HORVU2Hr1G016560	unknown	GDSL esterase/lipase	none	none	IPR013830		up
HORVU2Hr1G016750	MLOC_36991	serine/threonine protein kinase 1	GO:0004672, GO:0005524, GO:0006468, GO:0007165	PF00069, PF03822	IPR000719, IPR002290, IPR004041, IPR008271, IPR011009, IPR017441, IPR018451, IPR028375	down	down
HORVU2Hr1G016800	MLOC_288	RINT-1 / TIP-1 family	GO:0005783, GO:0048193	PF04437	IPR007528	up	up
HORVU2Hr1G017420	MLOC_59062	Stress responsive protein	none	none	IPR000772	up	up
HORVU2Hr1G017460	MLOC_65101	NAC domain protein,	GO:0003677, GO:0006355	PF02365	IPR003441	up	up		up
HORVU2Hr1G017680	unknown	E3 ubiquitin-protein ligase SHPRH	GO:0005515, GO:0005524, GO:0008270	PF00176, PF00628	IPR000330, IPR001965, IPR011011, IPR013083, IPR014001, IPR019786, IPR019787, IPR027417		down	up	up
HORVU2Hr1G017770	MLOC_44267	vacuolar sorting receptor homolog 1	GO:0005509	PF02225	IPR003137, IPR012336, IPR018097	up			up
HORVU2Hr1G017900	MLOC_22026	alpha-galactosidase 2	GO:0003824, GO:0004553, GO:0005975	PF16499	IPR002241, IPR013785, IPR017853				up
HORVU2Hr1G018440	MLOC_79176	Peroxidase superfamily protein	GO:0004601, GO:0006979, GO:0020037, GO:0055114	PF00141	IPR000823, IPR002016, IPR010255, IPR019793, IPR019794	down	down
HORVU2Hr1G018480	MLOC_55663	Peroxidase superfamily protein	GO:0004601, GO:0006979, GO:0020037, GO:0055114	PF00141	IPR000823, IPR002016, IPR010255, IPR019793, IPR019794	down	down	up
HORVU2Hr1G018600	unknown	transcription regulators	GO:0046983	none	IPR011598	down	down
HORVU2Hr1G018670	MLOC_64517	unknown function	none	none	none	up	up		up
HORVU2Hr1G018720	MLOC_61918	acyl-CoA dehydrogenase-related	GO:0003995, GO:0008152, GO:0016627, GO:0050660, GO:0055114	PF00441, PF02770, PF02771	IPR006091, IPR009075, IPR009100, IPR013786				down
HORVU2Hr1G019160	MLOC_60369	60S ribosomal protein L22-2	GO:0003735, GO:0005622, GO:0005840, GO:0006412	PF01776	IPR002671	up
HORVU2Hr1G019190	unknown	DNA-directed RNA polymerases II, IV and V subunit 8B	GO:0006351	PF03870	IPR005570, IPR012340			up	up
HORVU2Hr1G019270	unknown	undescribed protein	GO:0009523, GO:0015979, GO:0016020	PF06596	IPR009518		down
HORVU2Hr1G019820	MLOC_6377	Photosystem I reaction center subunit N, chloroplastic	GO:0009522, GO:0015979	PF05479	IPR008796	up	up
HORVU2Hr1G019900	MLOC_71795	flowering promoting factor 1	none	none	none	up
HORVU2Hr1G019910	MLOC_71796	flowering promoting factor 1	none	none	none			down	down
HORVU2Hr1G020140	MLOC_72007	Two-component response regulator ARR18	GO:0003677	PF00249	IPR001005, IPR006447, IPR009057, IPR017930	up			up
HORVU2Hr1G020340	MLOC_16301	Protein kinase superfamily protein	GO:0004672, GO:0005524, GO:0006468	PF00069	IPR000719, IPR008271, IPR011009			up	up
HORVU2Hr1G020790	unknown	undescribed protein	none	none	none	up	up
HORVU2Hr1G021020	MLOC_4602	sodium hydrogen exchanger 2	GO:0006812, GO:0006814, GO:0006885, GO:0015299, GO:0015385, GO:0016021, GO:0055085	PF00999	IPR004709, IPR006153			up
HORVU2Hr1G021110	MLOC_22278	Superoxide dismutase [Cu-Zn] 2	GO:0004784, GO:0006801, GO:0046872, GO:0055114	PF00080	IPR001424, IPR018152	up
HORVU2Hr1G021320	MLOC_8879	Dehydrogenase/reductase SDR family member 4	GO:0008152, GO:0016491	PF00106	IPR002198, IPR002347, IPR013968, IPR016040	down		down
HORVU2Hr1G022260	MLOC_64401	RING finger protein 141	GO:0005515, GO:0008270	PF13920	IPR001841, IPR013083, IPR017907	up	up	up	up
HORVU2Hr1G022540	unknown	undescribed protein	none	none	none				down
HORVU2Hr1G022620	unknown	Disease resistance protein	GO:0043531	PF00931	IPR002182, IPR027417, IPR032675		down	down	down
HORVU2Hr1G022780	MLOC_6564	Haloacid dehalogenase-like hydrolase domain-containing protein 3	GO:0008152, GO:0016787	PF13419	IPR006439, IPR011949, IPR023214		down	up	up
HORVU2Hr1G022960	MLOC_17157	CASP-like protein 16	none	PF04535	IPR006702	up
HORVU2Hr1G023590	MLOC_9865	beta glucosidase 43	GO:0004553, GO:0005975	PF00232	IPR001360, IPR013781, IPR017853			up	up
HORVU2Hr1G023750	MLOC_6053	GDSL esterase/lipase	GO:0016788	PF00657	IPR001087, IPR013830	down	down
HORVU2Hr1G025090	MLOC_4093	Endonuclease/exonuclease/phosphatase family protein	none	PF03372	IPR005135			up
HORVU2Hr1G025140	MLOC_62732	Transformation/transcription domain-associated protein	GO:0005488, GO:0005515, GO:0016773	PF00454, PF02259, PF02260	IPR000403, IPR003151, IPR003152, IPR011009, IPR014009, IPR016024	up
HORVU2Hr1G025380	MLOC_18101	alpha/beta-Hydrolases superfamily protein	GO:0008152, GO:0016787	PF07859	IPR013094, IPR029058	up	up	down	down
HORVU2Hr1G027680	MLOC_61601	Haloacid dehalogenase-like hydrolase (HAD) superfamily protein	GO:0008152, GO:0016787	PF13419	IPR006439, IPR010237, IPR023214		up
HORVU2Hr1G027760	MLOC_65478	Mitochondrial substrate carrier family protein	none	PF00153	IPR018108, IPR023395		up
HORVU2Hr1G028330	unknown	EF hand family protein	none	none	none			up
HORVU2Hr1G028380	MLOC_57860	cellulose synthase-like A3	none	PF13641	IPR029044	up	up
HORVU2Hr1G028780	MLOC_70346	Chymotrypsin inhibitor	GO:0004867, GO:0009611	PF00280	IPR000864		down
HORVU2Hr1G029840	MLOC_38514	alpha/beta-Hydrolases superfamily protein	GO:0003824	PF12695	IPR000073, IPR000639, IPR029058, IPR029059	up	up	up
HORVU2Hr1G030190	MLOC_58006	receptor kinase 2	GO:0004672, GO:0005524, GO:0006468	PF00069	IPR000719, IPR011009, IPR013320, IPR017441	down	down
HORVU2Hr1G030480	MLOC_71470	Fasciclin-like protein FLA7	none	none	none	up	up	up	up
HORVU2Hr1G030610	MLOC_65903	EF hand family protein	GO:0005509	PF13202	IPR002048, IPR011992, IPR018247			down
HORVU2Hr1G030660	MLOC_37906	unknown function	none	none	none		down		down
HORVU2Hr1G030680	MLOC_10075	Dihydropteroate synthase	GO:0003848, GO:0004156, GO:0009396, GO:0042558, GO:0044237	PF00809, PF01288	IPR000489, IPR000550, IPR006390, IPR011005				down
HORVU2Hr1G030690	MLOC_10076	Receptor-like protein kinase	GO:0004672, GO:0005515, GO:0005524, GO:0006468	PF00069, PF08263, PF13855	IPR000719, IPR001611, IPR003591, IPR011009, IPR013210, IPR032675		up
HORVU2Hr1G031400	MLOC_62152	SPX domain gene 3	none	PF03105	IPR004331	up		up	up
HORVU2Hr1G031410	MLOC_40317	Transmembrane protein 87A	GO:0016021	PF06814	IPR009637				down
HORVU2Hr1G031730	unknown	Transcription initiation factor TFIID subunit 9	none	none	none	up		up
HORVU2Hr1G032100	unknown	undescribed protein	none	none	none	up	up	up	up
HORVU2Hr1G032670	MLOC_13480	Glycerophosphoryl diester phosphodiesterase	GO:0006629, GO:0008081	PF03009	IPR017946, IPR030395			up	up
HORVU2Hr1G032730	MLOC_12178	Nuclear transport factor 2	GO:0000166, GO:0003676, GO:0005622, GO:0006810	PF00076, PF02136	IPR000504, IPR002075, IPR012677, IPR018222, IPR032710				up
HORVU2Hr1G032780	MLOC_37848	methyl esterase 13	none	PF12697	IPR000073, IPR029058			up
HORVU2Hr1G032920	MLOC_484	Protein NRT1/ PTR FAMILY 8.3	GO:0005215, GO:0006810, GO:0016020	PF00854	IPR000109, IPR020846	down
HORVU2Hr1G032970	MLOC_36966	6-phosphogluconolactonase 1	GO:0005975, GO:0006098, GO:0017057	PF01182	IPR005900, IPR006148		down
HORVU2Hr1G033060	MLOC_75040	COBRA-like protein 6	GO:0010215, GO:0016049, GO:0031225	PF04833	IPR006918			down	down
HORVU2Hr1G033470	unknown	Carbohydrate-binding X8 domain superfamily protein	none	PF07983	IPR012946		down
HORVU2Hr1G034540	MLOC_66750	unknown function	none	PF11282	IPR021434				up
HORVU2Hr1G035830	MLOC_44556	HXXXD-type acyl-transferase family protein	GO:0016747	PF02458	IPR003480, IPR023213				up
HORVU2Hr1G036110	MLOC_77485	NADP-dependent glyceraldehyde-3-phosphate dehydrogenase	GO:0008152, GO:0016491, GO:0016620, GO:0055114	PF00171	IPR015590, IPR016160, IPR016161, IPR016162, IPR016163, IPR029510	up
HORVU2Hr1G036570	MLOC_284	sugar transporter 1	GO:0005215, GO:0016020, GO:0016021, GO:0022857, GO:0022891, GO:0055085	PF00083	IPR003663, IPR005828, IPR005829, IPR020846			down	down
HORVU2Hr1G036590	MLOC_38517	sugar transporter 9	GO:0005215, GO:0016020, GO:0016021, GO:0022857, GO:0022891, GO:0055085	PF00083	IPR003663, IPR005828, IPR005829, IPR020846			down	down
HORVU2Hr1G036960	MLOC_60073	Chlorophyll a-b binding protein 7, chloroplastic	none	PF00504	IPR022796, IPR023329	up	up
HORVU2Hr1G037550	MLOC_11751	tubulin alpha-4 chain	GO:0003924, GO:0005200, GO:0005525, GO:0005874, GO:0007017	PF00091, PF03953	IPR000217, IPR002452, IPR003008, IPR008280, IPR013838, IPR017975, IPR018316, IPR023123	down	down
HORVU2Hr1G037570	MLOC_11751	tubulin alpha-4 chain	GO:0003924, GO:0005200, GO:0005525, GO:0005874, GO:0007017	PF00091, PF03953	IPR000217, IPR002452, IPR003008, IPR008280, IPR017975, IPR018316, IPR023123	down	down
HORVU2Hr1G037620	unknown	Lactation elevated protein 1	none	PF14303	IPR029466		down	up	up
HORVU2Hr1G037750	MLOC_63678	receptor kinase 3	GO:0004672, GO:0005524, GO:0006468	PF00069	IPR000719, IPR011009, IPR013320, IPR017441	down
HORVU2Hr1G038260	MLOC_36726	Chalcone--flavonone isomerase	GO:0009813, GO:0016872, GO:0045430	PF16035	IPR016087, IPR016088			up
HORVU2Hr1G038940	MLOC_37052	Photosystem II 10 kDa polypeptide, chloroplastic	GO:0009523, GO:0009654, GO:0015979, GO:0042651	PF04725	IPR006814			down	down
HORVU2Hr1G038950	MLOC_56457	protein kinase family protein	GO:0004672, GO:0005524, GO:0006468	PF07714, PF12819	IPR000719, IPR001245, IPR002290, IPR008271, IPR011009, IPR013320, IPR017441, IPR024788	up	up	up	up
HORVU2Hr1G039510	MLOC_2675	Cytochrome c	GO:0009055, GO:0020037	PF13442	IPR009056	up	up
HORVU2Hr1G039960	MLOC_81258	Receptor-like protein kinase 5	GO:0004672, GO:0005524, GO:0006468	PF07714, PF08263	IPR000719, IPR001245, IPR011009, IPR013210, IPR032675		down
HORVU2Hr1G040780	MLOC_17002	Chlorophyll a-b binding protein 13, chloroplastic	none	PF00504	IPR022796, IPR023329	up
HORVU2Hr1G040830	MLOC_37693	F-box family protein	GO:0005515	none	IPR001810	up	up
HORVU2Hr1G041300	MLOC_62436	myb domain protein 41	GO:0003677	PF00249	IPR001005, IPR009057, IPR017930	up	up		up
HORVU2Hr1G042300	MLOC_74149	cellulose synthase-like D3	GO:0016020, GO:0016760, GO:0030244	PF03552	IPR005150, IPR029044			down	down
HORVU2Hr1G042350	MLOC_59289	cellulose-synthase like D2	GO:0016020, GO:0016760, GO:0030244	PF03552	IPR005150, IPR029044		down
HORVU2Hr1G043330	MLOC_63778	Phototropic-responsive NPH3 family protein	none	PF03000	IPR027356				up
HORVU2Hr1G043890	MLOC_67715	Xylanase inhibitor protein 1	GO:0004553, GO:0005975	PF00704	IPR001223, IPR013781, IPR017853			up	up
HORVU2Hr1G044520	MLOC_73815	receptor kinase 1	GO:0004672, GO:0005524, GO:0006468	PF00069, PF01657	IPR000719, IPR002290, IPR002902, IPR008271, IPR011009, IPR013320, IPR017441	down	down	down	down
HORVU2Hr1G044620	unknown	undescribed protein	none	none	none				up
HORVU2Hr1G044650	MLOC_74066	receptor kinase 1	GO:0004672, GO:0005524, GO:0006468	PF01657, PF07714	IPR000719, IPR001245, IPR002290, IPR002902, IPR008271, IPR011009, IPR013320, IPR017441	down
HORVU2Hr1G044680	MLOC_60954	receptor kinase 1	GO:0004672, GO:0005524, GO:0006468	PF01657, PF07714	IPR000719, IPR001245, IPR002290, IPR002902, IPR008271, IPR011009, IPR013320, IPR017441	down
HORVU2Hr1G045340	MLOC_3462	isocitrate lyase	GO:0003824, GO:0004451, GO:0008152, GO:0019752	PF00463	IPR006254, IPR015813, IPR018523	down	down
HORVU2Hr1G045900	unknown	glucose-6-phosphate/phosphate translocator 2	GO:0005215, GO:0006810, GO:0016021	PF03151	IPR004696, IPR004853				down
HORVU2Hr1G046050	MLOC_62021	nodulin MtN21 /EamA-like transporter family protein	GO:0016020, GO:0016021	PF00892	IPR000620		down	down
HORVU2Hr1G046370	MLOC_64688	18.8 kDa class V heat shock protein	none	PF00011	IPR002068, IPR008978		down	down	down
HORVU2Hr1G046740	MLOC_58581	Exonuclease 3'-5' domain-containing protein 2	none	none	none	up	down	down	down
HORVU2Hr1G048220	MLOC_72096	Transmembrane protein 184A	none	PF03619	IPR005178	up		up
HORVU2Hr1G050260	MLOC_26140	Ulp1 protease family, C-terminal catalytic domain containing protein	none	none	none		up
HORVU2Hr1G053190	MLOC_77755	Protein kinase superfamily protein	none	none	IPR011009			down
HORVU2Hr1G053260	MLOC_71915	Histone-lysine N-methyltransferase, H3 lysine-9 specific	GO:0005515, GO:0005634, GO:0008270, GO:0016571, GO:0018024, GO:0034968, GO:0042393	PF00856, PF02182, PF05033	IPR001214, IPR003105, IPR003606, IPR007728, IPR015947, IPR025794			down
HORVU2Hr1G055230	MLOC_81807	basic leucine-zipper 8	GO:0003700, GO:0006355, GO:0043565	PF00170	IPR004827			down	down
HORVU2Hr1G056440	unknown	Valine--tRNA ligase	GO:0000166, GO:0002161, GO:0004812, GO:0004832, GO:0005524, GO:0006418, GO:0006438	PF00133	IPR002300, IPR002303, IPR009008, IPR014729				up
HORVU2Hr1G056650	MLOC_56298	polyribonucleotide nucleotidyltransferase, putative	GO:0000175, GO:0003676, GO:0003723, GO:0006396	PF00013, PF01138, PF03725	IPR001247, IPR004087, IPR004088, IPR015847, IPR015848, IPR020568, IPR027408	up
HORVU2Hr1G056820	MLOC_61733	Pentatricopeptide repeat-containing protein	GO:0005515	PF01535, PF12854, PF13041, PF13812	IPR002885, IPR011990	up		up
HORVU2Hr1G057700	MLOC_78630	Oxygen-evolving enhancer protein 1, chloroplastic	GO:0005509, GO:0009523, GO:0009654, GO:0015979, GO:0016021, GO:0019898, GO:0042549	PF01716	IPR002628, IPR011250	down	down
HORVU2Hr1G059060	MLOC_1304	protein containing PDZ domain, a K-box domain, and a TPR region	GO:0005515	none	IPR001478, IPR011990, IPR013026, IPR019734	up	up
HORVU2Hr1G059520	MLOC_28868	Protein kinase superfamily protein	none	none	none	up	up
HORVU2Hr1G059620	MLOC_73209	Phosphatidylglycerol/phosphatidylinositol transfer protein	none	PF02221	IPR003172, IPR014756	up
HORVU2Hr1G060350	MLOC_61362	serine/threonine protein kinase 1	GO:0004672, GO:0005524, GO:0006468, GO:0007165	PF00069, PF03822	IPR000719, IPR002290, IPR004041, IPR008271, IPR011009, IPR017441, IPR018451	down		down
HORVU2Hr1G060460	MLOC_29449	Outer arm dynein light chain 1 protein	none	none	none	down	down
HORVU2Hr1G061060	MLOC_63300	Mitochondrial transcription termination factor family protein	none	none	none	up	up
HORVU2Hr1G061320	MLOC_11678	Homeobox protein knotted-1-like 12	GO:0003677, GO:0005634, GO:0006355, GO:0043565	PF03789, PF03790, PF03791, PF05920	IPR001356, IPR005539, IPR005540, IPR005541, IPR008422, IPR009057, IPR017970		down
HORVU2Hr1G062850	MLOC_4480	unknown function	none	PF08507	IPR013714	up	up
HORVU2Hr1G063350	MLOC_37680	Coffea canephora DH200=94 genomic scaffold, scaffold_8	none	PF04419, PF12907	IPR007513, IPR026939				up
HORVU2Hr1G063690	MLOC_59614	MATE efflux family protein	GO:0006855, GO:0015238, GO:0015297, GO:0016020, GO:0055085	PF01554	IPR002528	down	down
HORVU2Hr1G064160	MLOC_57236	sugar transporter 1	GO:0016021, GO:0022857, GO:0055085	PF00083	IPR005828, IPR020846	down		down	down
HORVU2Hr1G064370	unknown	Exocyst complex component 7	none	none	none			up
HORVU2Hr1G064950	MLOC_73989	transcription factor-related	GO:0046983	PF14215	IPR011598, IPR025610			down
HORVU2Hr1G065000	MLOC_58164	Encodes a protein involved in salt tolerance, names SIS (Salt Induced Serine rich).	none	none	none	up	up
HORVU2Hr1G066280	MLOC_14934	Serine/threonine-protein kinase	GO:0004672, GO:0004674, GO:0005524, GO:0006468, GO:0048544	PF00069, PF00954, PF01453, PF08276	IPR000719, IPR000858, IPR001480, IPR002290, IPR003609, IPR008271, IPR011009, IPR013320, IPR017441, IPR024171		down
HORVU2Hr1G066630	MLOC_6813	4-coumarate--CoA ligase-like 9	GO:0003824, GO:0008152	PF00501, PF13193	IPR000873, IPR020845, IPR025110				up
HORVU2Hr1G066820	MLOC_64216	Carboxypeptidase Y homolog A	GO:0004185, GO:0006508	PF00450	IPR001563, IPR018202, IPR029058	down
HORVU2Hr1G067750	MLOC_5001	Peptidyl-prolyl cis-trans isomerase	GO:0005515, GO:0006457	PF00254, PF07719, PF13414	IPR001179, IPR011990, IPR013026, IPR013105, IPR019734			up	up
HORVU2Hr1G068010	MLOC_45070	Alcohol dehydrogenase	GO:0016491, GO:0055114	PF08240, PF13602	IPR011032, IPR013154, IPR016040, IPR020843	down
HORVU2Hr1G068630	MLOC_55524	unknown function	none	PF05627	IPR008700	down	down		down
HORVU2Hr1G068790	MLOC_18361	Kelch repeat-containing protein	GO:0005515	PF01344	IPR006652, IPR015916	down	down
HORVU2Hr1G069710	MLOC_36374	unknown protein				up	up
HORVU2Hr1G070140	MLOC_43497	Heavy metal transport/detoxification superfamily protein	GO:0030001, GO:0046872	PF00403	IPR006121			down
HORVU2Hr1G070160	MLOC_43497	Heavy metal transport/detoxification superfamily protein	GO:0030001, GO:0046872	PF00403	IPR006121			down
HORVU2Hr1G070300	MLOC_75136	YELLOW STRIPE like 6	GO:0055085	PF03169	IPR004813	down
HORVU2Hr1G070310	MLOC_62907	hydroxysteroid dehydrogenase 1	none	none	IPR016040	up	up	up	up
HORVU2Hr1G070720	MLOC_3087	hydroxyproline-rich glycoprotein family protein	none	none	IPR027267	down
HORVU2Hr1G071070	MLOC_11916	Carboxypeptidase Y homolog A	GO:0004185, GO:0006508	PF00450	IPR001563, IPR018202, IPR029058		down
HORVU2Hr1G071890	MLOC_34619	Desiccation-related protein PCC13-62	none	PF13668	none	up	up
HORVU2Hr1G071960	MLOC_77651	Acetyl-coenzyme A synthetase	GO:0003824, GO:0003987, GO:0008152, GO:0016208, GO:0019427	PF00501, PF13193, PF16177	IPR000873, IPR011904, IPR020845, IPR025110, IPR032387	down
HORVU2Hr1G072420	MLOC_67411	Family of unknown function (DUF662)	none	PF04949	IPR007033		down
HORVU2Hr1G072500	MLOC_33623	1,4-alpha-glucan branching enzyme GlgB	GO:0003824, GO:0003844, GO:0004553, GO:0005975, GO:0005978, GO:0043169	PF00128, PF02806, PF02922	IPR004193, IPR006047, IPR006048, IPR006407, IPR006589, IPR013780, IPR013781, IPR013783, IPR014756, IPR017853	up
HORVU2Hr1G073210	MLOC_56998	Beta-fructofuranosidase, insoluble isoenzyme 2	GO:0004553, GO:0005975	PF00251	IPR001362, IPR013148, IPR023296	up	up	up	up
HORVU2Hr1G073680	MLOC_78644	Bifunctional inhibitor/lipid-transfer protein/seed storage 2S albumin superfamily protein	none	PF14368	IPR016140			up	up
HORVU2Hr1G073760	unknown	Peroxiredoxin-2	GO:0016209, GO:0016491, GO:0051920, GO:0055114	PF00578, PF10417	IPR000866, IPR012336, IPR019479	up		up
HORVU2Hr1G074960	MLOC_53007	cellulose synthase-like B4	GO:0016020, GO:0016760, GO:0030244	PF03552	IPR005150	down	down
HORVU2Hr1G075370	unknown	undescribed protein	none	none	none	up	up		down
HORVU2Hr1G075930	MLOC_74492	Late embryogenesis abundant protein (LEA) family protein	none	PF13664	IPR025423	up	up
HORVU2Hr1G077230	MLOC_4026	glutathione S-transferase	GO:0005515	PF13417	IPR004045, IPR012336		up
HORVU2Hr1G078140	unknown	U-box domain-containing protein 52	none	none	none				up
HORVU2Hr1G078200	unknown	Synaptic vesicle 2-related protein	none	none	none			up
HORVU2Hr1G078570	MLOC_75088	Aldose reductase	GO:0016491, GO:0055114	PF00248	IPR018170, IPR020471, IPR023210	up		up	up
HORVU2Hr1G079840	MLOC_44619	Lipase/lipooxygenase, PLAT/LH2 family protein	GO:0005515	PF01477	IPR001024	up	up		up
HORVU2Hr1G079920	MLOC_11961	Chlorophyll a-b binding protein, chloroplastic	none	PF00504	IPR022796, IPR023329		up
HORVU2Hr1G080070	MLOC_65566	Aldose 1-epimerase	GO:0003824, GO:0005975, GO:0016853, GO:0019318, GO:0030246	PF01263	IPR008183, IPR011013, IPR014718, IPR015443			down	down
HORVU2Hr1G080100	MLOC_57134	Aldose 1-epimerase	GO:0003824, GO:0005975, GO:0016853, GO:0019318, GO:0030246	PF01263	IPR008183, IPR011013, IPR014718, IPR015443			up
HORVU2Hr1G080350	MLOC_68132	Transmembrane amino acid transporter family protein	none	PF01490	IPR013057				up
HORVU2Hr1G080970	MLOC_66224	Betaine aldehyde dehydrogenase	GO:0008152, GO:0016491, GO:0016620, GO:0055114	PF00171	IPR015590, IPR016160, IPR016161, IPR016162, IPR016163, IPR029510	up		up
HORVU2Hr1G081220	MLOC_17328	TRICHOME BIREFRINGENCE-LIKE 22	none	PF13839	IPR026057	down
HORVU2Hr1G081590	unknown	Heavy metal transport/detoxification superfamily protein	none	none	none			down	down
HORVU2Hr1G081950	MLOC_55950	Leucine-rich receptor-like protein kinase family protein	GO:0004672, GO:0005515, GO:0005524, GO:0006468	PF07714, PF08263, PF13855	IPR000719, IPR001245, IPR001611, IPR003591, IPR011009, IPR013210, IPR017441, IPR032675	down	down
HORVU2Hr1G082330	MLOC_23616	undescribed protein	GO:0003677, GO:0006355	PF02365	IPR003441	up	up	up	up
HORVU2Hr1G082740	MLOC_18327	Voltage-gated potassium channel subunit beta-2	none	PF00248	IPR023210			up	up
HORVU2Hr1G083100	MLOC_34542	protein-l-isoaspartate methyltransferase 1	GO:0004719, GO:0006464	PF01135	IPR000682, IPR029063	up	up
HORVU2Hr1G083340	MLOC_34088	Cyclin-T1-3	none	none	none				down
HORVU2Hr1G083490	MLOC_15784	Histone acetyltransferase HAC5	none	none	none	down	down	down	down
HORVU2Hr1G083560	MLOC_56390	replication factor C subunit 3	GO:0003677, GO:0003887, GO:0005524, GO:0006260, GO:0009360	PF13177	IPR003593, IPR008921, IPR012763, IPR027417				down
HORVU2Hr1G083620	unknown	unknown protein					up
HORVU2Hr1G084130	MLOC_66196	malate synthase	GO:0003824, GO:0004474, GO:0006097	PF01274	IPR001465, IPR011076, IPR019830	up	up
HORVU2Hr1G084420	MLOC_73663	BnaA09g28020D protein	none	none	none			down	down
HORVU2Hr1G085270	MLOC_34632	Chitinase	GO:0004568, GO:0005975, GO:0006032, GO:0008061, GO:0016998	PF00182, PF00187	IPR000726, IPR001002, IPR016283, IPR018371, IPR023346				down
HORVU2Hr1G085300	unknown	haloacid dehalogenase-like hydrolase family protein	GO:0008152, GO:0016787	PF00702	IPR006439, IPR023214	up
HORVU2Hr1G085570	MLOC_21234	Cytochrome b561 and DOMON domain-containing protein	GO:0016021	PF03188, PF03351	IPR004877, IPR005018, IPR006593			up	up
HORVU2Hr1G086040	MLOC_75514	Photosystem II reaction center PsbP family protein	GO:0005509, GO:0009523, GO:0009654, GO:0015979, GO:0019898	PF01789	IPR002683, IPR016123		up
HORVU2Hr1G086080	MLOC_33074	6,7-dimethyl-8-ribityllumazine synthase	GO:0009231, GO:0009349	PF00885	IPR002180	up			up
HORVU2Hr1G086160	MLOC_55157	Peroxidase superfamily protein	GO:0004601, GO:0006979, GO:0020037, GO:0055114	PF00141	IPR000823, IPR002016, IPR010255, IPR019793		up		up
HORVU2Hr1G087970	MLOC_3886	Isocitrate dehydrogenase [NADP]	GO:0000287, GO:0004450, GO:0006102, GO:0016616, GO:0051287, GO:0055114	PF00180	IPR004790, IPR019818, IPR024084	up
HORVU2Hr1G088110	MLOC_69973	inter-alpha-trypsin inhibitor heavy chain-related	GO:0005515, GO:0008270	PF00092, PF14624, PF17123	IPR001841, IPR002035, IPR013083, IPR032838	down			down
HORVU2Hr1G088180	MLOC_12266	triglyceride lipases					up
HORVU2Hr1G088520	MLOC_73824	Tetratricopeptide repeat (TPR)-like superfamily protein	none	none	none	up
HORVU2Hr1G088540	MLOC_5179	Caleosin-related family protein	none	PF05042	IPR007736	up
HORVU2Hr1G088570	MLOC_73772	Serine/threonine-protein kinase	GO:0004672, GO:0004674, GO:0005524, GO:0006468, GO:0048544	PF00069, PF00954, PF01453, PF08276	IPR000719, IPR000858, IPR001480, IPR002290, IPR003609, IPR008271, IPR011009, IPR013320, IPR017441, IPR024171	down	down
HORVU2Hr1G088660	MLOC_57234	Caleosin-related family protein	none	PF05042	IPR007736	up	up	up	up
HORVU2Hr1G089210	MLOC_12466	NAC domain protein,	GO:0003677, GO:0006355	PF02365	IPR003441			up	up
HORVU2Hr1G089440	MLOC_22224	phenylalanine ammonia-lyase 2	GO:0003824, GO:0005737, GO:0006559, GO:0016841	PF00221	IPR001106, IPR005922, IPR008948, IPR022313, IPR023144, IPR024083	down	down
HORVU2Hr1G089620	MLOC_6463	Cytokinin riboside 5'-monophosphate phosphoribohydrolase	none	PF03641	IPR005269, IPR031100	down	down	down	down
HORVU2Hr1G089940	MLOC_14656	Aquaporin-like superfamily protein	GO:0005215, GO:0006810, GO:0016020	PF00230	IPR000425, IPR022357, IPR023271	down
HORVU2Hr1G089950	MLOC_54858	IAA-amino acid hydrolase ILR1-like 5	GO:0008152, GO:0016787	PF01546, PF07687	IPR002933, IPR011650, IPR017439		up
HORVU2Hr1G090070	MLOC_17228	Photosynthetic NDH subunit of lumenal location 3, chloroplastic	GO:0005509, GO:0009523, GO:0009654, GO:0015979, GO:0019898	PF05757	IPR008797, IPR023222				down
HORVU2Hr1G090160	MLOC_52145	Cytokinin dehydrogenase 8	GO:0003824, GO:0009690, GO:0016614, GO:0019139, GO:0050660, GO:0055114	PF09265	IPR015345, IPR016164, IPR016166, IPR016170		down
HORVU2Hr1G090740	MLOC_57980	GRAM domain-containing protein / ABA-responsive protein-related	none	PF02893	IPR004182				up
HORVU2Hr1G090750	MLOC_57981	Alpha-amylase/subtilisin inhibitor	GO:0004866	PF00197	IPR002160, IPR011065	up	up
HORVU2Hr1G090980	MLOC_43630	Starch synthase 2, chloroplastic/amyloplastic	GO:0004373	PF00534, PF08323	IPR001296, IPR011835, IPR013534			up
HORVU2Hr1G091270	MLOC_60721	beta-xylosidase 2	GO:0004553, GO:0005975	PF01915, PF14310	IPR001764, IPR002772, IPR017853, IPR026891	down
HORVU2Hr1G091460	MLOC_13954	Dehydrogenase/reductase SDR family member 12	GO:0008152, GO:0016491	PF00106	IPR002198, IPR002347, IPR016040	down
HORVU2Hr1G091910	MLOC_20933	Acid beta-fructofuranosidase	GO:0004553, GO:0005975	PF00251, PF08244	IPR001362, IPR013148, IPR013189, IPR013320, IPR023296		down
HORVU2Hr1G092100	unknown	Cysteine-rich repeat secretory protein 15	none	PF01657	IPR002902			up
HORVU2Hr1G092190	MLOC_34020	Hsp70-Hsp90 organizing protein	GO:0005515	PF00515, PF13181, PF13414	IPR001440, IPR006636, IPR011990, IPR013026, IPR019734				up
HORVU2Hr1G092250	MLOC_77511	kinesin-like protein 1	GO:0003777, GO:0005524, GO:0007018, GO:0008017	PF00225, PF11995	IPR001752, IPR019821, IPR021881, IPR027417		down
HORVU2Hr1G092530	MLOC_77349	Aldehyde dehydrogenase family 3 member F1	GO:0008152, GO:0016491, GO:0016620, GO:0055114	PF00171	IPR015590, IPR016161, IPR016163			up	up
HORVU2Hr1G093190	unknown	1-aminocyclopropane-1-carboxylate oxidase-like protein 1	none	none	none		up
HORVU2Hr1G093960	MLOC_7452	RING/U-box superfamily protein	GO:0005515, GO:0008270	PF13639	IPR001841, IPR011016, IPR013083		down		up
HORVU2Hr1G094190	MLOC_18578	Nuclear transport factor 2 (NTF2) family protein	none	PF10184	IPR018790, IPR032710	down	down
HORVU2Hr1G094230	MLOC_5973	1-aminocyclopropane-1-carboxylate synthase 11	GO:0003824, GO:0009058, GO:0030170	PF00155	IPR004838, IPR004839, IPR015421, IPR015424			up	up
HORVU2Hr1G094390	unknown	histone H1-3	GO:0000786, GO:0003677, GO:0005634, GO:0006334	PF00538	IPR005818, IPR005819, IPR011991				up
HORVU2Hr1G094960	MLOC_10292	F-box protein PP2-A13	none	PF14299	IPR025886			up
HORVU2Hr1G095080	MLOC_10110	Cytochrome P450 superfamily protein	GO:0005506, GO:0016705, GO:0020037, GO:0055114	PF00067	IPR001128, IPR002401, IPR017972			up	up
HORVU2Hr1G095160	MLOC_71571	S-adenosyl-L-methionine-dependent methyltransferases superfamily protein	GO:0008168	PF03141	IPR004159, IPR029063	down
HORVU2Hr1G095880	MLOC_57353	Transducin/WD40 repeat-like superfamily protein	GO:0005515	PF08596	IPR001680, IPR013905, IPR015943, IPR017986	up	up	up	up
HORVU2Hr1G096360	MLOC_80094	Aquaporin-like superfamily protein	GO:0005215, GO:0006810, GO:0016020	PF00230	IPR000425, IPR022357, IPR023271	down
HORVU2Hr1G096380	MLOC_11663	Branched-chain-amino-acid aminotransferase 6	GO:0003824, GO:0004084, GO:0008152, GO:0009081	PF01063	IPR001544, IPR005786, IPR018300	down
HORVU2Hr1G096890	MLOC_79717	UDP-Glycosyltransferase superfamily protein	GO:0008152, GO:0016758	PF00201	IPR002213	down	down
HORVU2Hr1G097200	MLOC_44190	Bifunctional inhibitor/lipid-transfer protein/seed storage 2S albumin superfamily protein	none	PF14547	IPR016140, IPR027923	down	down
HORVU2Hr1G097380	MLOC_44871	pectinesterase 11	GO:0005618, GO:0030599, GO:0042545	PF01095	IPR000070, IPR011050, IPR012334, IPR018040	down	down
HORVU2Hr1G097490	MLOC_60217	expansin B4	GO:0005576, GO:0019953	PF01357, PF03330	IPR005795, IPR007112, IPR007117, IPR007118, IPR009009		up
HORVU2Hr1G097700	MLOC_71633	unknown protein					up
HORVU2Hr1G098660	MLOC_70077	Calcium-binding EF-hand family protein	GO:0005509	none	IPR002048, IPR011992, IPR018247	up	up
HORVU2Hr1G098880	MLOC_58262	Succinylornithine transaminase/acetylornithine aminotransferase	GO:0003824, GO:0008483, GO:0030170	PF00202	IPR005814, IPR015421, IPR015422, IPR015424	down	down
HORVU2Hr1G098890	MLOC_68636	Cytochrome P450 superfamily protein	GO:0005506, GO:0016705, GO:0020037, GO:0055114	PF00067	IPR001128, IPR002401	down	down
HORVU2Hr1G099330	MLOC_37224	Polyglutamine-binding protein 1	none	none	none	up	up
HORVU2Hr1G099640	MLOC_74047	VACUOLAR SORTING RECEPTOR 5	none	none	none				down
HORVU2Hr1G099870	MLOC_14295	Late embryogenesis abundant protein (LEA) family protein	none	none	none	up	up
HORVU2Hr1G100290	MLOC_58250	unknown function	none	PF08312	IPR013170	up
HORVU2Hr1G100640	MLOC_59820	unknown protein				up
HORVU2Hr1G100960	MLOC_55953	unknown protein				down	down
HORVU2Hr1G101040	MLOC_55553	calcium-transporting ATPase, putative	GO:0000166, GO:0005388, GO:0005524, GO:0016020, GO:0016021, GO:0070588	PF00689, PF00702	IPR001757, IPR006068, IPR006408, IPR023214, IPR023298, IPR023299	up	up
HORVU2Hr1G101160	MLOC_64805	xyloglucan endotransglucosylase/hydrolase 16	GO:0004553, GO:0005618, GO:0005975, GO:0006073, GO:0010411, GO:0016762, GO:0042546, GO:0048046	PF00722, PF06955	IPR000757, IPR008263, IPR010713, IPR013320, IPR016455			up	up
HORVU2Hr1G101670	MLOC_28316	V-type proton ATPase subunit G 1	GO:0015992, GO:0016471, GO:0016820	PF03179	IPR005124	up
HORVU2Hr1G102010	MLOC_39219	Glucan endo-1,3-beta-D-glucosidase	GO:0004553, GO:0005975	PF00332, PF07983	IPR000490, IPR012946, IPR013781, IPR017853	down	down
HORVU2Hr1G102100	MLOC_14218	Bifunctional inhibitor/lipid-transfer protein/seed storage 2S albumin superfamily protein	none	PF14368	IPR016140			down
HORVU2Hr1G102110	MLOC_14732	Bifunctional inhibitor/lipid-transfer protein/seed storage 2S albumin superfamily protein	none	PF14368	IPR016140	down		down
HORVU2Hr1G102530	unknown	Protein kinase family protein	GO:0004672, GO:0005524, GO:0006468	PF00069	IPR000719, IPR002290, IPR008271, IPR011009, IPR013320, IPR017441	down
HORVU2Hr1G103880	MLOC_64217	Kelch-like protein 17	GO:0005515	PF01344	IPR006652, IPR015916			up
HORVU2Hr1G104080	unknown	undescribed protein	none	none	none	up	up	up	up
HORVU2Hr1G104640	MLOC_40031	U-box domain-containing protein 11	GO:0004842, GO:0016567	PF04564	IPR003613, IPR013083		down
HORVU2Hr1G105100	unknown	Protein of unknown function (DUF581)	none	PF04570	IPR007650				up
HORVU2Hr1G105140	MLOC_16978	Protein of unknown function (DUF581)	none	PF04570	IPR007650			up	up
HORVU2Hr1G105240	MLOC_21840	purine permease 11	none	PF16913	none	up		up
HORVU2Hr1G105560	unknown	Acidic endochitinase	GO:0004553, GO:0005975	PF00704	IPR001223, IPR001579, IPR013781, IPR017853		up
HORVU2Hr1G105650	unknown	undescribed protein	none	none	none		down
HORVU2Hr1G105720	MLOC_54978	U-box domain-containing protein	GO:0004842, GO:0016567	PF04564	IPR003613, IPR013083	down
HORVU2Hr1G105740	MLOC_65794	undescribed protein	GO:0009790	PF03760	IPR005513	up	up		up
HORVU2Hr1G106410	MLOC_54759	Glycogen synthase 1	GO:0004373, GO:2001070	PF00534, PF08323, PF16760	IPR001296, IPR005085, IPR011835, IPR013534	up	up
HORVU2Hr1G107040	MLOC_6986	ROP-interactive CRIB motif-containing protein 6	none	PF00786	IPR000095	down	down
HORVU2Hr1G107150	MLOC_47020	Leucine-rich repeat receptor-like protein kinase family protein	GO:0005515	PF00560, PF08263, PF13855	IPR001611, IPR003591, IPR013210, IPR032675		down	down	down
HORVU2Hr1G107740	MLOC_60465	Glycosyltransferase	none	none	none			up
HORVU2Hr1G108250	MLOC_72881	Anthocyanidin reductase	GO:0003824, GO:0050662	PF01370	IPR001509, IPR016040				up
HORVU2Hr1G108420	MLOC_76160	xyloglucan endotransglucosylase/hydrolase 9	GO:0004553, GO:0005618, GO:0005975, GO:0006073, GO:0010411, GO:0016762, GO:0042546, GO:0048046	PF00722, PF06955	IPR000757, IPR008264, IPR010713, IPR013320, IPR016455	down	down
HORVU2Hr1G108460	MLOC_78745	unknown function	none	none	none			down	down
HORVU2Hr1G108520	unknown	Protein FLOWERING LOCUS T	none	PF01161	IPR001858, IPR008914	up		up
HORVU2Hr1G108530	MLOC_10080	Serine/threonine-protein kinase	GO:0048544	PF00954, PF01453, PF08276	IPR000858, IPR001480, IPR003609	down	down		down
HORVU2Hr1G108580	unknown	undescribed protein	none	none	none	up			down
HORVU2Hr1G109120	MLOC_57850	Beta-fructofuranosidase, insoluble isoenzyme 7	GO:0004553, GO:0005975	PF00251	IPR001362, IPR013148, IPR023296	down
HORVU2Hr1G109430	MLOC_59019	HXXXD-type acyl-transferase family protein	GO:0016747	PF02458	IPR003480, IPR023213	down			down
HORVU2Hr1G109590	MLOC_17496	HXXXD-type acyl-transferase family protein	GO:0016747	PF02458	IPR003480, IPR023213	down
HORVU2Hr1G109810	unknown	Cysteine-rich receptor-like protein kinase 19	none	none	none	down	down	down	down
HORVU2Hr1G109990	MLOC_58358	V-type proton ATPase subunit a3	GO:0000220, GO:0015078, GO:0015991, GO:0033179	PF01496	IPR002490, IPR026028				down
HORVU2Hr1G110120	MLOC_73371	Adenosylhomocysteinase	GO:0004013, GO:0006730	PF00670, PF05221	IPR000043, IPR015878, IPR016040, IPR020082	up		up
HORVU2Hr1G110230	MLOC_11726	Protein kinase superfamily protein	GO:0004672, GO:0005524, GO:0006468	PF00069	IPR000719, IPR002290, IPR008271, IPR011009, IPR017441	up	up	up	up
HORVU2Hr1G111120	unknown	unknown function	none	none	none	down	down
HORVU2Hr1G111540	MLOC_10729	Farnesyl pyrophosphate synthase 2	GO:0008299	PF00348	IPR000092, IPR008949	up
HORVU2Hr1G112070	MLOC_68625	Cytochrome P450 superfamily protein	GO:0005506, GO:0016705, GO:0020037, GO:0055114	PF00067	IPR001128, IPR002401, IPR017972	down	down	down
HORVU2Hr1G112090	MLOC_44152	Serine/threonine-protein kinase	GO:0004672, GO:0004674, GO:0005524, GO:0006468, GO:0048544	PF00069, PF00954, PF01453, PF08276	IPR000719, IPR000858, IPR001480, IPR002290, IPR003609, IPR008271, IPR011009, IPR013320, IPR017441, IPR024171	down	down
HORVU2Hr1G112230	MLOC_60720	Zinc transporter 8	GO:0005385, GO:0016020, GO:0016021, GO:0030001, GO:0046873, GO:0055085, GO:0071577	PF02535	IPR003689, IPR004698		down
HORVU2Hr1G112450	MLOC_59339	purple acid phosphatase 21	none	PF14008	IPR025733, IPR029052	up	up
HORVU2Hr1G112580	MLOC_5210	endonuclease 4	GO:0003676, GO:0004519, GO:0006308, GO:0016788	PF02265	IPR003154, IPR008947			up
HORVU2Hr1G112620	unknown	Staphylococcal nuclease homologue	none	PF00565	IPR016071	down	down	down	down
HORVU2Hr1G112830	MLOC_5210	Nuclease S1	GO:0003676, GO:0004519, GO:0006308, GO:0016788	PF02265	IPR003154, IPR008947			up	up
HORVU2Hr1G113060	MLOC_68622	Protein kinase family protein	GO:0004672, GO:0005509, GO:0005524, GO:0006468, GO:0030247	PF00069, PF13947	IPR000719, IPR001881, IPR002290, IPR008271, IPR011009, IPR013320, IPR017441, IPR018097, IPR025287	up	up
HORVU2Hr1G113270	MLOC_395	Isoaspartyl peptidase/L-asparaginase	GO:0016787	PF01112	IPR000246, IPR029055		down	up	up
HORVU2Hr1G113830	MLOC_70044	Filament-like plant protein 7	none	PF05911	IPR008587			down
HORVU2Hr1G114380	MLOC_57252	EamA-like transporter family isoform 1	GO:0016020, GO:0016021	PF00892	IPR000620			down
HORVU2Hr1G114900	MLOC_48781	Coffea canephora DH200=94 genomic scaffold, scaffold_45	none	none	none	down	down
HORVU2Hr1G115360	unknown	undescribed protein	none	none	none			down
HORVU2Hr1G115730	MLOC_59127	Stress enhanced protein 2, chloroplastic	none	none	none	up
HORVU2Hr1G115750	MLOC_66989	unknown function	none	none	none			up	up
HORVU2Hr1G116150	MLOC_34370	RNA-binding protein 1	GO:0000166, GO:0003676	PF00076, PF14259	IPR000504, IPR012677	up	up
HORVU2Hr1G116390	MLOC_74116	Chalcone synthase 1	GO:0003824, GO:0008152, GO:0009058, GO:0016746, GO:0016747	PF00195, PF02797	IPR001099, IPR011141, IPR012328, IPR016039, IPR018088	down	down
HORVU2Hr1G116780	MLOC_4473	Wound-responsive family protein	none	PF12609	IPR022251		down
HORVU2Hr1G116800	MLOC_76721	Wound-responsive family protein	none	PF12609	IPR022251		down
HORVU2Hr1G116880	MLOC_10722	Protein kinase superfamily protein	GO:0004672, GO:0004674, GO:0005524, GO:0006468, GO:0048544	PF00069, PF00954, PF01453, PF08276	IPR000719, IPR000858, IPR001480, IPR002290, IPR003609, IPR008271, IPR011009, IPR013320, IPR017441, IPR024171	down	down		down
HORVU2Hr1G117290	MLOC_72147	Serine/threonine-protein kinase	GO:0048544	PF00954, PF01453, PF08276	IPR000858, IPR001480, IPR003609, IPR011009, IPR013320	down	down	down
HORVU2Hr1G117550	unknown	undescribed protein	none	none	none		down		down
HORVU2Hr1G117870	MLOC_59972	Protein kinase superfamily protein	GO:0004672, GO:0005524, GO:0006468, GO:0048544	PF00954, PF01453, PF07714, PF08276	IPR000719, IPR000858, IPR001245, IPR001480, IPR002290, IPR003609, IPR008271, IPR011009, IPR013320, IPR017441	down
HORVU2Hr1G117940	MLOC_57976	Heavy metal transport/detoxification superfamily protein	GO:0030001, GO:0046872	PF00403	IPR006121	down	down	down	down
HORVU2Hr1G118050	MLOC_56865	undescribed protein	GO:0030001, GO:0046872	PF00403	IPR006121	down	down	down	down
HORVU2Hr1G118060	MLOC_56865	Heavy metal transport/detoxification superfamily protein	none	none	none		down
HORVU2Hr1G118080	MLOC_67310	Heavy metal transport/detoxification superfamily protein	GO:0030001, GO:0046872	PF00403	IPR006121		down	down	down
HORVU2Hr1G118100	MLOC_67310	Heavy metal transport/detoxification superfamily protein	GO:0030001, GO:0046872	PF00403	IPR006121	down	down	down	down
HORVU2Hr1G118350	MLOC_12855	gibberellin 3-oxidase 1	none	PF14226	IPR026992, IPR027443				down
HORVU2Hr1G118510	MLOC_10582	exocyst subunit exo70 family protein F1	GO:0000145, GO:0006887	PF03081	IPR004140, IPR016159	up
HORVU2Hr1G118570	MLOC_65621	Aluminium induced protein with YGL and LRDR motifs	none	PF12481	IPR024286			up
HORVU2Hr1G118740	MLOC_6620	allantoinase	GO:0000256, GO:0004038, GO:0008270, GO:0016787, GO:0016810, GO:0050897	PF01979	IPR006680, IPR011059, IPR017593, IPR032466	down	down	down
HORVU2Hr1G118790	MLOC_79590	Beta-fructofuranosidase, insoluble isoenzyme 7	GO:0004553, GO:0005975	PF00251, PF08244	IPR001362, IPR013148, IPR013189, IPR013320, IPR023296	up			up
HORVU2Hr1G120200	MLOC_33439	BTB/POZ domain-containing protein	none	PF03000	IPR011333, IPR027356		down
HORVU2Hr1G120490	MLOC_36886	Two-component response regulator ORR6	GO:0000160	PF00072	IPR001789, IPR011006			down	down
HORVU2Hr1G120750	unknown	Receptor protein kinase-like protein	GO:0005515	PF00560	IPR001611, IPR032675		down	down
HORVU2Hr1G121050	unknown	polyamine oxidase 4	GO:0016491, GO:0055114	PF01593	IPR001613, IPR002937, IPR016040, IPR023753			down	down
HORVU2Hr1G121080	MLOC_55129	Protein kinase superfamily protein	GO:0004672, GO:0004674, GO:0005515, GO:0005524, GO:0006468, GO:0048544	PF00954, PF01453, PF07714, PF08276	IPR000719, IPR000742, IPR000858, IPR001245, IPR001480, IPR002290, IPR003609, IPR008271, IPR011009, IPR013320, IPR024171	down
HORVU2Hr1G121310	MLOC_63702	Serine/threonine-protein kinase	GO:0004672, GO:0005524, GO:0006468, GO:0048544	PF00069, PF00954, PF01453, PF08276	IPR000719, IPR000858, IPR001480, IPR002290, IPR003609, IPR008271, IPR011009, IPR013320, IPR017441	down	down
HORVU2Hr1G121630	unknown	Chromosome 3B, genomic scaffold, cultivar Chinese Spring	none	none	none				up
HORVU2Hr1G122470	MLOC_59872	Acyl-protein thioesterase 1	GO:0016787	PF02230	IPR003140, IPR029058				down
HORVU2Hr1G122590	MLOC_68912	FAD-binding Berberine family protein	GO:0003824, GO:0016491, GO:0016614, GO:0050660, GO:0055114	PF01565, PF08031	IPR006094, IPR012951, IPR016166, IPR016167, IPR016169				up
HORVU2Hr1G123770	MLOC_58362	2-succinylbenzoate--CoA ligase	GO:0003824, GO:0008152	PF00501, PF13193	IPR000873, IPR025110	up	up
HORVU2Hr1G124320	unknown	Glutathione S-transferase family protein	GO:0005515	PF00043, PF13417	IPR004045, IPR004046, IPR010987, IPR012336		up	up	up
HORVU2Hr1G124530	MLOC_54850	Protein kinase superfamily protein	GO:0004672, GO:0005524, GO:0006468	PF07714	IPR000719, IPR001245, IPR002290, IPR008271, IPR011009		down
HORVU2Hr1G124740	MLOC_54778	nodulin MtN21 /EamA-like transporter family protein	GO:0016020, GO:0016021	PF00892	IPR000620	down	down
HORVU2Hr1G124800	MLOC_62347	Thioredoxin superfamily protein	GO:0045454	PF00085	IPR012336, IPR013766	down	down
HORVU2Hr1G125250	MLOC_23221	receptor kinase 2	GO:0004672, GO:0005524, GO:0006468	PF00069, PF01657	IPR000719, IPR002290, IPR002902, IPR008271, IPR011009, IPR013320, IPR017441	down	down	down
HORVU2Hr1G126040	MLOC_66083	NAC domain containing protein 76	GO:0003677, GO:0006355	PF02365	IPR003441				down
HORVU2Hr1G126730	MLOC_60852	C2 calcium/lipid-binding plant phosphoribosyltransferase family protein	GO:0005515	PF00168, PF08372	IPR000008, IPR013583				up
HORVU2Hr1G127070	MLOC_54099	phosphatidylinositol-4-phosphate 5-kinase family protein	GO:0005524, GO:0016307, GO:0046488	PF00118, PF01504	IPR002423, IPR002498, IPR016034, IPR027409, IPR027483, IPR027484	up	up
HORVU2Hr1G127250	MLOC_60701	proteinaceous RNase P 1	none	PF13812, PF16953	IPR002885, IPR031595		up
HORVU3Hr1G000120	MLOC_37807	Subtilisin-like protease	GO:0004252, GO:0006508	PF00082, PF05922	IPR000209, IPR010259, IPR015500, IPR022398, IPR023828		down
HORVU3Hr1G000350	MLOC_55306	Protein kinase superfamily protein	GO:0004672, GO:0005524, GO:0006468	PF07714	IPR000719, IPR001245, IPR002290, IPR008271, IPR011009			down
HORVU3Hr1G000400	MLOC_21379	RING/U-box superfamily protein	GO:0005515, GO:0008270	PF12678	IPR001841, IPR013083, IPR024766	down
HORVU3Hr1G000550	MLOC_76442	Chromosome 3B, genomic scaffold, cultivar Chinese Spring	none	none	none		down
HORVU3Hr1G000690	MLOC_13071	Chromosome 3B, genomic scaffold, cultivar Chinese Spring	none	none	none	down
HORVU3Hr1G000720	unknown	Chromosome 3B, genomic scaffold, cultivar Chinese Spring	none	none	none		down		down
HORVU3Hr1G000980	MLOC_58219	Protein kinase family protein	GO:0004672, GO:0005524, GO:0006468	PF00069	IPR000719, IPR002290, IPR008271, IPR011009, IPR013320	down	down
HORVU3Hr1G001020	MLOC_40282	Protein kinase family protein	GO:0004672, GO:0005524, GO:0006468	PF07714	IPR000719, IPR001245, IPR002290, IPR008271, IPR011009		down	down	down
HORVU3Hr1G001260	MLOC_29149	terpene synthase 21	GO:0000287, GO:0008152, GO:0010333, GO:0016829	PF01397, PF03936	IPR001906, IPR005630, IPR008930, IPR008949	up	up
HORVU3Hr1G001680	MLOC_61361	TPX2 (targeting protein for Xklp2) protein family	none	PF06886	IPR027329	down	down
HORVU3Hr1G001940	unknown	undescribed protein	none	none	none			down
HORVU3Hr1G002040	MLOC_9841	Fatty acyl-CoA reductase 1	GO:0080019	PF03015, PF07993	IPR013120, IPR016040, IPR026055	down	down
HORVU3Hr1G002210	MLOC_60137	Protein kinase superfamily protein	GO:0004672, GO:0005524, GO:0006468	PF00069	IPR000719, IPR002290, IPR008271, IPR011009, IPR013320, IPR017441		down
HORVU3Hr1G002280	MLOC_62156	sucrose phosphate synthase 1F	GO:0005985, GO:0016157, GO:0046524	PF00534, PF00862, PF05116	IPR000368, IPR001296, IPR006380, IPR012819			up	up
HORVU3Hr1G002470	MLOC_24609	receptor-like protein kinase 4	GO:0004672, GO:0005524, GO:0006468	PF00069	IPR000719, IPR002290, IPR008271, IPR011009, IPR013320, IPR017441	down	down	down
HORVU3Hr1G002530	MLOC_61891	receptor-like protein kinase 4	GO:0004672, GO:0005524, GO:0006468	PF07714	IPR000719, IPR001245, IPR002290, IPR008271, IPR011009, IPR013320, IPR017441			down
HORVU3Hr1G002980	MLOC_61000	Glycine-rich domain-containing protein 2	none	PF07173	IPR009836		up		up
HORVU3Hr1G003410	MLOC_12252	tryptophan synthase alpha chain	GO:0003824, GO:0004834, GO:0006568, GO:0008152	PF00290	IPR002028, IPR011060, IPR013785	down
HORVU3Hr1G003850	MLOC_49356	Nuclease S1	GO:0003676, GO:0004519, GO:0006308, GO:0016788	PF02265	IPR003154, IPR008947	up	up	up
HORVU3Hr1G004140	MLOC_64594	Bowman-Birk type trypsin inhibitor	GO:0004867, GO:0005576	PF00228	IPR000877	up		up	up
HORVU3Hr1G004190	unknown	Bowman-Birk type trypsin inhibitor	GO:0004867, GO:0005576	PF00228	IPR000877	up		up
HORVU3Hr1G004250	MLOC_62055	Bowman-Birk type trypsin inhibitor	GO:0004867, GO:0005576	PF00228	IPR000877	up	up
HORVU3Hr1G005800	MLOC_14294	Chromosome 3B, genomic scaffold, cultivar Chinese Spring	none	none	none	down	down
HORVU3Hr1G006640	MLOC_73463	receptor kinase 2	GO:0004672, GO:0005524, GO:0006468	PF01657, PF07714	IPR000719, IPR001245, IPR002290, IPR002902, IPR008271, IPR011009, IPR013320, IPR017441		down	down	down
HORVU3Hr1G006800	MLOC_39510	receptor kinase 2	GO:0004672, GO:0005524, GO:0006468	PF01657, PF07714	IPR000719, IPR001245, IPR002290, IPR002902, IPR008271, IPR011009, IPR013320	down
HORVU3Hr1G007280	MLOC_36446	Delta(7)-sterol-C5(6)-desaturase 1	GO:0005506, GO:0006633, GO:0016491, GO:0055114	PF04116	IPR006694			down
HORVU3Hr1G007290	MLOC_36714	Calmodulin-binding protein	GO:0005516, GO:0006950	PF07887	IPR012416			up	up
HORVU3Hr1G007500	MLOC_44536	16.9 kDa class I heat shock protein 1	none	PF00011	IPR002068, IPR008978	up	up	up	up
HORVU3Hr1G007580	MLOC_35270	COBRA-like protein 5	GO:0010215, GO:0016049, GO:0031225	PF04833	IPR006918		down	down
HORVU3Hr1G007680	MLOC_27655	receptor-like protein kinase 4	GO:0004672, GO:0005524, GO:0006468, GO:0030247	PF00069, PF13947	IPR000719, IPR002290, IPR008271, IPR011009, IPR017441, IPR025287	down	down
HORVU3Hr1G008280	MLOC_57817	GDSL esterase/lipase	GO:0016788	PF00657	IPR001087, IPR013830	down	down
HORVU3Hr1G009210	MLOC_53258	Photosystem I reaction center subunit XI	GO:0009522, GO:0009538, GO:0015979	PF02605	IPR003757	up
HORVU3Hr1G009560	MLOC_15917	Non-specific lipid-transfer protein 4.1	GO:0006869, GO:0008289	PF00234	IPR000528, IPR016140			up
HORVU3Hr1G009940	unknown	Galactosyltransferase family protein	GO:0030246	PF00337	IPR001079, IPR013320	down	down
HORVU3Hr1G010030	MLOC_45726	Repressor of RNA polymerase III transcription	GO:0016480	PF09174	IPR015257			down
HORVU3Hr1G010070	MLOC_65427	Leucine-rich repeat protein kinase family protein	none	PF12819	IPR024788, IPR032675				up
HORVU3Hr1G010190	MLOC_75135	B3 domain-containing transcription factor NGA2	GO:0003677, GO:0003700, GO:0006355	PF00847, PF02362	IPR001471, IPR003340, IPR015300, IPR016177	down	down		down
HORVU3Hr1G012260	MLOC_60673	E3 ubiquitin-protein ligase	GO:0004842, GO:0005515, GO:0008270, GO:0016567	none	IPR008974, IPR013323	up	up
HORVU3Hr1G012530	MLOC_57877	F-box/LRR-repeat protein 7	GO:0005515	PF13516	IPR001611, IPR006553, IPR032675				down
HORVU3Hr1G013250	MLOC_56905	Disease resistance protein (CC-NBS-LRR class) family	GO:0005515, GO:0043531	PF00931, PF13855	IPR001611, IPR002182, IPR027417, IPR032675	down	down	down
HORVU3Hr1G013390	MLOC_51843	Serine/threonine-protein kinase	GO:0004672, GO:0004674, GO:0005524, GO:0006468, GO:0048544	PF00069, PF00954, PF01453, PF08276	IPR000719, IPR000858, IPR001480, IPR002290, IPR003609, IPR008271, IPR011009, IPR013320, IPR017441, IPR024171		down
HORVU3Hr1G013840	unknown	Metallothioneine type2	GO:0046872	PF01439	IPR000347	up	up
HORVU3Hr1G013910	MLOC_75057	Asparagine synthetase [glutamine-hydrolyzing]	GO:0004066, GO:0006529	PF00733, PF13537	IPR001962, IPR014729, IPR017932, IPR029055		up	up
HORVU3Hr1G014120	MLOC_38039	unknown function	none	PF14200	IPR000772	up	up
HORVU3Hr1G014850	MLOC_66417	Chromosome 3B, genomic scaffold, cultivar Chinese Spring	none	none	none				down
HORVU3Hr1G015060	MLOC_57377	Snurportin-1	none	none	none	up
HORVU3Hr1G015680	MLOC_60245	Zinc-binding dehydrogenase family protein	GO:0016491, GO:0055114	PF00107, PF16884	IPR011032, IPR013149, IPR016040, IPR020843	down	down
HORVU3Hr1G016360	MLOC_60091	D111/G-patch domain-containing protein	GO:0003676	PF01585	IPR000467		down	down
HORVU3Hr1G016430	MLOC_66151	Raffinose synthase family protein	GO:0003824	PF05691	IPR008811, IPR013785, IPR017853	up	up	up
HORVU3Hr1G016860	unknown	Chymotrypsin inhibitor	GO:0004867, GO:0009611	PF00280	IPR000864				down
HORVU3Hr1G017020	MLOC_11783	receptor kinase 3	GO:0004672, GO:0005524, GO:0006468	PF07714	IPR000719, IPR001245, IPR002290, IPR008271, IPR011009, IPR013320, IPR017441	down	down
HORVU3Hr1G017330	MLOC_67248	Amino-acid permease BAT1 homolog	GO:0003333, GO:0006865, GO:0015171, GO:0016020, GO:0016021, GO:0055085	PF13520	IPR002293, IPR004840			down	down
HORVU3Hr1G017480	MLOC_27217	undescribed protein	none	none	none		down
HORVU3Hr1G017630	MLOC_52874	Ca-2+ dependent nuclease	none	PF00565	IPR016071		up
HORVU3Hr1G018030	MLOC_73537	receptor-like protein kinase 2	GO:0004672, GO:0005515, GO:0005524, GO:0006468	PF00069, PF08263, PF13855	IPR000719, IPR001611, IPR002290, IPR003591, IPR008271, IPR011009, IPR013210, IPR013320, IPR017441, IPR032675		down
HORVU3Hr1G018390	MLOC_54567	Leucine-rich repeat receptor-like protein kinase family protein	GO:0005515	PF00560, PF13855	IPR001611, IPR003591, IPR032675			down	down
HORVU3Hr1G018530	MLOC_80465	NADPH:quinone oxidoreductase	GO:0016491	PF03358	IPR005025, IPR029039	down	down		down
HORVU3Hr1G018610	MLOC_4492	receptor kinase 2	GO:0004672, GO:0005524, GO:0006468, GO:0030246	PF00069, PF00139	IPR000719, IPR001220, IPR002290, IPR008271, IPR011009, IPR013320, IPR017441		up	up	up
HORVU3Hr1G018650	MLOC_15108	pyruvate decarboxylase-2	GO:0000287, GO:0003824, GO:0030976	PF00205, PF02775	IPR011766, IPR012000, IPR029035, IPR029061	up	up	up
HORVU3Hr1G018810	MLOC_19759	FASCICLIN-like arabinogalactan-protein 11	none	PF02469	IPR000782	down	down
HORVU3Hr1G019510	MLOC_63525	Zinc finger CCCH domain-containing protein 2	GO:0046872	PF00642	IPR000571	up	up	up	up
HORVU3Hr1G019790	MLOC_35785	NAD-dependent malic enzyme 1	GO:0004470, GO:0004471, GO:0006108, GO:0051287, GO:0055114	PF00390, PF03949	IPR001891, IPR012301, IPR012302, IPR015884, IPR016040	down
HORVU3Hr1G019850	MLOC_58639	cytokinin oxidase/dehydrogenase 6	GO:0003824, GO:0009690, GO:0016491, GO:0016614, GO:0019139, GO:0050660, GO:0055114	PF01565, PF09265	IPR006093, IPR006094, IPR015345, IPR016164, IPR016166, IPR016167, IPR016169, IPR016170	down		down
HORVU3Hr1G020300	MLOC_6673	FACT complex subunit SSRP1-A	GO:0003677, GO:0005634	PF03531, PF08512	IPR000969, IPR009071, IPR011993, IPR013719, IPR024954				up
HORVU3Hr1G020390	MLOC_75844	17.6 kDa class II heat shock protein	none	PF00011	IPR002068, IPR008978	up	up	up	up
HORVU3Hr1G020490	MLOC_78762	17.6 kDa class II heat shock protein	none	PF00011	IPR002068, IPR008978	up	up	up	up
HORVU3Hr1G020520	MLOC_78762	17.6 kDa class II heat shock protein	none	PF00011	IPR002068, IPR008978	up		up	up
HORVU3Hr1G020780	MLOC_60815	Alkaline alpha-galactosidase seed imbibition protein	GO:0003824	PF05691	IPR008811, IPR013785, IPR017853	up	up	up
HORVU3Hr1G021080	MLOC_70434	Choline/ethanolamine kinase	none	PF01633	IPR011009	up
HORVU3Hr1G021190	MLOC_52900	Chromosome 3B, genomic scaffold, cultivar Chinese Spring	none	none	none		down
HORVU3Hr1G021750	MLOC_11893	Serine incorporator 1	GO:0016020	PF03348	IPR005016		down
HORVU3Hr1G022310	unknown	Histone-lysine N-methyltransferase	none	none	none	up
HORVU3Hr1G022340	MLOC_77427	HXXXD-type acyl-transferase family protein	GO:0016747	PF02458	IPR003480, IPR023213	down	down	up	up
HORVU3Hr1G022890	MLOC_2111	unknown protein						up
HORVU3Hr1G023150	unknown	Benzoate O-methyltransferase	GO:0008168	PF03492	IPR005299, IPR029063	down	down
HORVU3Hr1G023910	MLOC_53497	Cytochrome P450 superfamily protein	GO:0005506, GO:0016705, GO:0020037, GO:0055114	PF00067	IPR001128, IPR002401	down	down
HORVU3Hr1G024170	MLOC_11787	NADH:cytochrome B5 reductase 1	GO:0016491, GO:0055114	PF00175, PF00970	IPR001433, IPR001709, IPR001834, IPR008333, IPR017927, IPR017938	up
HORVU3Hr1G024200	MLOC_16223	unknown protein						down
HORVU3Hr1G024590	MLOC_55828	Phosphoenolpyruvate/phosphate translocator 3, chloroplastic	none	PF03151	IPR004853	down	down
HORVU3Hr1G024950	MLOC_79028	Protein kinase superfamily protein	GO:0004672, GO:0005524, GO:0006468	PF07714, PF12819	IPR000719, IPR001245, IPR002290, IPR008271, IPR011009, IPR013320, IPR017441, IPR024788			up
HORVU3Hr1G025810	MLOC_11691	serine/threonine protein kinase 1	GO:0004672, GO:0005524, GO:0006468, GO:0007165	PF00069, PF03822	IPR000719, IPR002290, IPR004041, IPR008271, IPR011009, IPR017441, IPR018451	up	up
HORVU3Hr1G026110	MLOC_36627	Pentatricopeptide repeat-containing protein	GO:0005515, GO:0008270	PF01535, PF13041, PF14432	IPR002885, IPR011990, IPR032867				up
HORVU3Hr1G026270	MLOC_36529	Subtilisin-like protease	GO:0004252, GO:0006508	PF00082, PF05922	IPR000209, IPR010259, IPR015500, IPR022398, IPR023828	down		up	up
HORVU3Hr1G026690	unknown	Meiosis 5	none	none	none	up	up
HORVU3Hr1G026990	MLOC_79063	Homeobox-leucine zipper protein family	GO:0003677, GO:0008289	PF00046, PF01852, PF08670	IPR001356, IPR002913, IPR009057, IPR013978, IPR023393			up	up
HORVU3Hr1G027220	MLOC_42935	Polyketide cyclase/dehydrase and lipid transport superfamily protein	none	PF10604	IPR019587, IPR023393	down	down
HORVU3Hr1G027240	MLOC_43327	Chromosome 3B, genomic scaffold, cultivar Chinese Spring	none	PF05553	IPR008480			up	up
HORVU3Hr1G027700	MLOC_79367	Class I glutamine amidotransferase-like superfamily protein	none	PF01965	IPR002818, IPR006287, IPR029062		down
HORVU3Hr1G028050	MLOC_2425	GDSL esterase/lipase	GO:0016788	PF00657	IPR001087, IPR013830	down	down
HORVU3Hr1G028780	MLOC_29490	Chromosome 3B, genomic scaffold, cultivar Chinese Spring	none	PF04398	IPR007493	up		up	up
HORVU3Hr1G029150	MLOC_55770	O-methyltransferase family protein	GO:0008168, GO:0008171, GO:0046983	PF00891, PF08100	IPR001077, IPR011991, IPR012967, IPR016461, IPR029063	down	down
HORVU3Hr1G029470	MLOC_62754	Endoglucanase 2	GO:0003824, GO:0004553, GO:0005975, GO:0030246	PF00759, PF09478	IPR001701, IPR008928, IPR012341, IPR018221, IPR019028	down	down
HORVU3Hr1G030340	MLOC_38935	Mitochondrial substrate carrier family protein	none	PF00153	IPR018108, IPR023395	up	up
HORVU3Hr1G030580	MLOC_71849	Replication protein A 32 kDa subunit B	none	none	IPR012340	up
HORVU3Hr1G030650	MLOC_5174	Late embryogenesis abundant protein	GO:0009269	PF03168	IPR004864, IPR013783, IPR013990	up	up	up	up
HORVU3Hr1G030770	MLOC_64351	ATPase family gene 2 protein	GO:0005524	PF00004	IPR003593, IPR003959, IPR003960, IPR027417	up	up	up	up
HORVU3Hr1G032170	MLOC_66539	Plant regulator RWP-RK family protein	GO:0005515	PF00564, PF02042	IPR000270, IPR003035			down
HORVU3Hr1G032420	MLOC_16235	DDB1- and CUL4-associated factor 13	GO:0005515	PF00400	IPR001680, IPR015943, IPR017986, IPR019775	up		up
HORVU3Hr1G032540	MLOC_70542	Leucine-rich receptor-like protein kinase family protein	GO:0004672, GO:0005515, GO:0005524, GO:0006468	PF00069, PF13855	IPR000719, IPR001611, IPR002290, IPR003591, IPR008271, IPR011009, IPR013320, IPR017441, IPR032675	down	down		down
HORVU3Hr1G034100	MLOC_18280	germin-like protein 10	GO:0030145, GO:0045735	PF00190	IPR001929, IPR006045, IPR011051, IPR014710, IPR019780	down	down	down	down
HORVU3Hr1G035030	MLOC_61264	Chromosome 3B, genomic scaffold, cultivar Chinese Spring	none	none	none	down
HORVU3Hr1G035590	MLOC_32219	beta glucosidase 7	GO:0005975	none	IPR013781, IPR017853			down
HORVU3Hr1G035810	MLOC_12866	Protein kinase superfamily protein	GO:0004672, GO:0005524, GO:0006468	PF00069	IPR000719, IPR002290, IPR008271, IPR011009, IPR013320, IPR017441	down	down	down	down
HORVU3Hr1G036020	MLOC_77422	kinesin-like protein 1	GO:0003777, GO:0005524, GO:0007018, GO:0008017	PF00225	IPR001752, IPR027417	down	down	down
HORVU3Hr1G038850	MLOC_2952	Pentatricopeptide repeat-containing protein	GO:0005515	PF01535	IPR002885, IPR011990			down
HORVU3Hr1G039700	MLOC_73432	Chaperone protein DnaJ 1	none	PF00226	IPR001623	up	up
HORVU3Hr1G039790	MLOC_67764	50S ribosomal protein L40	none	none	none				up
HORVU3Hr1G039930	MLOC_49468	Magnesium-protoporphyrin IX monomethyl ester [oxidative] cyclase 3	GO:0015979, GO:0015995, GO:0016491, GO:0046872, GO:0048529, GO:0055114	PF02915	IPR003251, IPR008434, IPR009078			up
HORVU3Hr1G041030	MLOC_47566	RING/U-box superfamily protein	GO:0005515, GO:0008270	PF06547, PF13639	IPR001841, IPR010543, IPR013083	up	up		up
HORVU3Hr1G041810	MLOC_6376	receptor-like protein kinase 1	GO:0004672, GO:0005524, GO:0006468	PF00069	IPR000719, IPR002290, IPR008271, IPR011009, IPR017441			up	up
HORVU3Hr1G041820	MLOC_12117	Protein kinase superfamily protein	GO:0004672, GO:0005524, GO:0006468	PF07714	IPR000719, IPR001245, IPR002290, IPR008271, IPR011009, IPR017441	down
HORVU3Hr1G041850	MLOC_56349	Magnesium transporter NIPA2	GO:0015095, GO:0015693, GO:0016021	PF05653	IPR008521			down
HORVU3Hr1G043840	unknown	Isopenicillin N epimerase	none	none	none		down	down
HORVU3Hr1G045460	unknown	Histone-lysine N-methyltransferase	none	none	none				up
HORVU3Hr1G045480	MLOC_10928	dehydroquinate dehydratase, putative / shikimate dehydrogenase, putative	GO:0003824, GO:0003855, GO:0004764, GO:0019632, GO:0050661, GO:0055114	PF01487, PF01488, PF08501	IPR001381, IPR006151, IPR011342, IPR013708, IPR013785, IPR016040, IPR022893	up
HORVU3Hr1G045610	MLOC_70319	Nodulin-like / Major Facilitator Superfamily protein	none	PF06813	IPR010658, IPR020846	down	down
HORVU3Hr1G049780	MLOC_13110	Heavy metal transport/detoxification superfamily protein	GO:0030001, GO:0046872	PF00403	IPR006121	up	up
HORVU3Hr1G050340	MLOC_52176	Protein phosphatase 2C family protein	GO:0003824, GO:0043169	PF00481	IPR000222, IPR001932	up	up	up	up
HORVU3Hr1G050450	MLOC_63257	beta galactosidase 1	GO:0004553, GO:0005975	PF01301	IPR001944, IPR013781, IPR017853, IPR019801, IPR031330				up
HORVU3Hr1G050590	MLOC_12079	WRKY DNA-binding protein 50	GO:0003700, GO:0006355, GO:0043565	PF03106	IPR003657		down
HORVU3Hr1G051830	MLOC_71353	Protein kinase superfamily protein	GO:0004672, GO:0005524, GO:0006468	PF07714	IPR000719, IPR001245, IPR008271, IPR011009, IPR013320			up	up
HORVU3Hr1G052490	MLOC_76936	5'-methylthioadenosine/S-adenosylhomocysteine nucleosidase	GO:0003824, GO:0009116	PF01048	IPR000845	down	down	up	up
HORVU3Hr1G052710	MLOC_7981	myb-like transcription factor family protein	GO:0003676, GO:0003677, GO:0008270	PF00249	IPR001005, IPR001878, IPR006447, IPR009057, IPR017930		down
HORVU3Hr1G055020	MLOC_46305	MatR	none	none	none	up		up
HORVU3Hr1G055830	MLOC_68778	P-loop containing nucleoside triphosphate hydrolases superfamily protein	GO:0005524	PF00004	IPR003593, IPR003959, IPR003960, IPR027417			down	down
HORVU3Hr1G055870	MLOC_52460	Neutral ceramidase	none	PF04734, PF17048	IPR031329, IPR031331				up
HORVU3Hr1G055990	MLOC_11563	AP-4 complex subunit beta	GO:0005488, GO:0006886, GO:0016192, GO:0030117, GO:0030131	PF01602, PF09066	IPR002553, IPR011989, IPR015151, IPR016024				up
HORVU3Hr1G056640	MLOC_72363	Chromosome 3B, genomic scaffold, cultivar Chinese Spring	none	none	none	down	down		down
HORVU3Hr1G056960	MLOC_56451	Siroheme synthase	GO:0006779, GO:0008152, GO:0008168, GO:0043115, GO:0055114	PF00590	IPR000878, IPR003043, IPR006366, IPR014776, IPR014777	down
HORVU3Hr1G057270	MLOC_77458	RNA-binding KH domain-containing protein	GO:0003676, GO:0003723	PF00013	IPR004087, IPR004088	up			up
HORVU3Hr1G057400	MLOC_16980	BnaA07g15680D protein	none	none	none		up
HORVU3Hr1G058740	MLOC_72188	Protein CHUP1, chloroplastic	none	none	none				up
HORVU3Hr1G058810	MLOC_12810	TRICHOME BIREFRINGENCE-LIKE 38	none	PF13839, PF14416	IPR025846, IPR026057	down	down
HORVU3Hr1G059030	MLOC_80542	unknown protein				up	up	up	up
HORVU3Hr1G059170	MLOC_65528	Protein phosphatase 2C family protein	GO:0003824	PF00481	IPR001932	up	up	up	up
HORVU3Hr1G059220	MLOC_44455	WRKY family transcription factor	GO:0003700, GO:0006355, GO:0043565	PF03106	IPR003657			down	down
HORVU3Hr1G059480	MLOC_57391	Acidic endochitinase	GO:0004553, GO:0005975	PF00704	IPR001223, IPR001579, IPR013781, IPR017853	down	down
HORVU3Hr1G060390	MLOC_4609	mitogen-activated protein kinase 18	GO:0004672, GO:0004707, GO:0005524, GO:0006468	PF00069	IPR000719, IPR002290, IPR003527, IPR011009, IPR017441			down	down
HORVU3Hr1G060720	MLOC_5835	Cytochrome b561 domain-containing protein	GO:0016021	PF03188	IPR004877, IPR006593	down	down
HORVU3Hr1G061410	MLOC_56692	Serine/threonine-protein kinase	GO:0004672, GO:0004674, GO:0005524, GO:0006468, GO:0048544	PF00069, PF00954, PF01453	IPR000719, IPR000858, IPR001480, IPR002290, IPR008271, IPR011009, IPR013320, IPR024171		down
HORVU3Hr1G061930	MLOC_64975	Tubby-like F-box protein 1	none	PF01167	IPR000007, IPR018066, IPR025659	down		down	down
HORVU3Hr1G062430	MLOC_14009	Chromosome 3B, genomic scaffold, cultivar Chinese Spring	none	PF11145	IPR021319	down	down	down	down
HORVU3Hr1G062520	unknown	Metal ion binding protein, putative, expressed	GO:0030001, GO:0046872	PF00403	IPR006121	down	down
HORVU3Hr1G062540	MLOC_12312	DNA-directed RNA polymerase III 62 kDa polypeptide, putative	none	none	none	up
HORVU3Hr1G062940	MLOC_8076	O-acyltransferase (WSD1-like) family protein	GO:0004144, GO:0045017	PF03007, PF06974	IPR004255, IPR009721	up	up	up
HORVU3Hr1G063620	MLOC_12156	microtubule-associated protein 65-4	GO:0000226, GO:0000910, GO:0008017	PF03999	IPR007145				down
HORVU3Hr1G064550	MLOC_6125	Serine/arginine-rich splicing factor 1	GO:0000166, GO:0003676	PF00076	IPR000504, IPR012677	up	up		up
HORVU3Hr1G064680	MLOC_63875	Protein transport protein Sec61 subunit alpha	GO:0015031, GO:0016020	PF00344, PF10559	IPR002208, IPR019561, IPR023201, IPR030659				down
HORVU3Hr1G065260	MLOC_57925	Lipid A export ATP-binding/permease protein MsbA	GO:0005524, GO:0006810, GO:0016021, GO:0016887, GO:0042626, GO:0055085	PF00005, PF00664	IPR003439, IPR011527, IPR027417	down	down
HORVU3Hr1G065770	MLOC_4116	Bidirectional sugar transporter N3	GO:0016021	PF03083	IPR004316			down
HORVU3Hr1G065810	MLOC_7040	Subtilisin-like protease	GO:0004252, GO:0006508	PF00082, PF02225	IPR000209, IPR003137, IPR015500, IPR023828	up	up	down
HORVU3Hr1G066310	MLOC_60990	GDSL esterase/lipase	GO:0016788	PF00657	IPR001087, IPR013830	down
HORVU3Hr1G066340	MLOC_4753	Late embryogenesis abundant protein 76	none	none	none	up	up
HORVU3Hr1G066870	unknown	undescribed protein	none	none	none			up	up
HORVU3Hr1G067110	MLOC_36667	Glycine dehydrogenase (decarboxylating)	GO:0003824, GO:0004375, GO:0006544, GO:0006546, GO:0055114	PF02347	IPR003437, IPR015421, IPR015424, IPR020580			up
HORVU3Hr1G067280	MLOC_65036	Glucan endo-1,3-beta-glucosidase 14	GO:0004553, GO:0005975	PF00332	IPR000490, IPR013781, IPR017853	down	down
HORVU3Hr1G067380	unknown	Protein phosphatase 2C family protein	GO:0003824, GO:0043169	PF00481	IPR000222, IPR001932	up	up	up	up
HORVU3Hr1G067760	MLOC_55427	S-adenosyl-L-methionine-dependent methyltransferases superfamily protein	GO:0008152, GO:0008168	PF08241	IPR013216, IPR029063		up
HORVU3Hr1G067840	MLOC_56148	Type IV inositol polyphosphate 5-phosphatase 3	GO:0046856	PF03372	IPR000300, IPR005135		up
HORVU3Hr1G067910	MLOC_37474	Alliinase	GO:0003824, GO:0016846	PF04863, PF04864	IPR006947, IPR006948, IPR015421, IPR015422, IPR015424			down
HORVU3Hr1G068200	MLOC_57417	Heavy metal transport/detoxification superfamily protein	GO:0030001, GO:0046872	PF00403	IPR006121			down
HORVU3Hr1G068380	MLOC_67686	Inorganic pyrophosphatase 1	GO:0008152, GO:0016791	PF06888	IPR006383, IPR006384, IPR016965, IPR023214	up
HORVU3Hr1G068410	MLOC_51359	Disease resistance protein RGA2	GO:0043531	PF00931	IPR002182, IPR027417			down	down
HORVU3Hr1G068650	MLOC_5108	Lipid A export ATP-binding/permease protein MsbA	GO:0005524, GO:0006810, GO:0016021, GO:0016887, GO:0042626, GO:0055085	PF00005, PF00664	IPR003439, IPR003593, IPR011527, IPR017871, IPR027417	down	down
HORVU3Hr1G068780	MLOC_63404	CASP-like protein 3A1	none	PF04535	IPR006702	up	up	down
HORVU3Hr1G068810	MLOC_20639	Beta-fructofuranosidase, insoluble isoenzyme 7	none	none	none	up	up
HORVU3Hr1G068840	MLOC_63920	WD-40 repeat family protein	GO:0005515	PF00400	IPR001680, IPR015943, IPR017986, IPR019775, IPR020472	up	up
HORVU3Hr1G069010	MLOC_7433	Protein of unknown function, DUF584	none	PF04520	IPR007608			up	up
HORVU3Hr1G070490	unknown	profilin 5	none	PF00235	IPR005455	down	down
HORVU3Hr1G070600	MLOC_18610	receptor kinase 3	GO:0004672, GO:0005524, GO:0006468	PF07714	IPR000719, IPR001245, IPR002290, IPR008271, IPR011009, IPR017441			up	up
HORVU3Hr1G070660	MLOC_36270	Chromosome 3B, genomic scaffold, cultivar Chinese Spring	none	PF12274	IPR022059	up	up
HORVU3Hr1G070690	MLOC_54094	hexokinase 1	GO:0001678, GO:0004396, GO:0005524, GO:0005536, GO:0005975, GO:0006096, GO:0016773, GO:0046835	PF00349, PF03727	IPR001312, IPR019807, IPR022672, IPR022673				up
HORVU3Hr1G070700	MLOC_38400	Leucine-rich receptor-like protein kinase family protein	GO:0004672, GO:0005515, GO:0005524, GO:0006468	PF07714, PF08263, PF13855	IPR000719, IPR001245, IPR001611, IPR002290, IPR003591, IPR008271, IPR011009, IPR013210, IPR017441, IPR032675			down	down
HORVU3Hr1G070850	MLOC_64502	NAD-dependent malic enzyme 2	GO:0004470, GO:0004471, GO:0006108, GO:0051287, GO:0055114	PF00390, PF03949	IPR001891, IPR012301, IPR012302, IPR015884, IPR016040	up	up	up	up
HORVU3Hr1G070860	MLOC_64503	Protein cereblon	GO:0004176, GO:0006508	PF02190	IPR003111, IPR015947	up	up	up	up
HORVU3Hr1G071370	MLOC_4663	early nodulin-like protein 1	GO:0009055	PF02298	IPR003245, IPR008972	up	up
HORVU3Hr1G071470	MLOC_10748	ABC transporter G family member 32	GO:0005524, GO:0016020, GO:0016887	PF00005, PF01061, PF08370, PF14510	IPR003439, IPR003593, IPR013525, IPR013581, IPR027417, IPR029481				down
HORVU3Hr1G071530	MLOC_64398	50S ribosomal protein L13	GO:0003735, GO:0005840, GO:0006412	PF00572	IPR005822, IPR005823, IPR023563, IPR023564				up
HORVU3Hr1G071570	MLOC_81502	trehalose phosphate synthase	GO:0003824, GO:0005992	PF00982, PF02358	IPR001830, IPR003337, IPR006379, IPR023214	down
HORVU3Hr1G071770	MLOC_43749	cellulose synthase family protein	GO:0016020, GO:0016760, GO:0030244	PF03552	IPR005150, IPR013083, IPR029044	down	down	down
HORVU3Hr1G071800	MLOC_56649	Coiled-coil domain-containing protein 25	none	PF05670	IPR008532	down	down	down
HORVU3Hr1G072910	MLOC_55890	Katanin p60 ATPase-containing subunit A-like 2	GO:0005524	PF00004	IPR003593, IPR003959, IPR027417	up
HORVU3Hr1G073100	MLOC_74559	serine/threonine protein kinase 1	GO:0004672, GO:0005524, GO:0006468, GO:0007165	PF00069, PF03822	IPR000719, IPR002290, IPR004041, IPR008271, IPR011009, IPR017441, IPR018451			down
HORVU3Hr1G073190	MLOC_4451	Dynein light chain	GO:0005875, GO:0007017	PF01221	IPR001372	down
HORVU3Hr1G073240	MLOC_64416	Protein ABIL1	none	none	none	down		down
HORVU3Hr1G073280	MLOC_50971	Chromosome 3B, genomic scaffold, cultivar Chinese Spring	none	none	none	down	down		down
HORVU3Hr1G073470	MLOC_54333	Protein tesmin/TSO1-like CXC 5	none	PF03638	IPR005172	up
HORVU3Hr1G074250	MLOC_56245	Pentatricopeptide repeat-containing protein	GO:0005515	PF01535, PF13041, PF13812	IPR002885, IPR011990	down
HORVU3Hr1G074280	MLOC_55969	Deoxycytidylate deaminase	GO:0003824, GO:0008270, GO:0016787	PF00383	IPR002125, IPR016192, IPR016193			up
HORVU3Hr1G074640	MLOC_51588	regulatory protein (NPR1)	GO:0005515	PF00651, PF11900, PF12313, PF13637	IPR000210, IPR002110, IPR011333, IPR020683, IPR021094, IPR024228	down	down
HORVU3Hr1G075150	MLOC_43875	Protein LURP-one-related 12	none	PF04525	IPR007612, IPR025659			down
HORVU3Hr1G075820	MLOC_69130	Chromosome 3B, genomic scaffold, cultivar Chinese Spring	GO:0003677, GO:0005634, GO:0006352, GO:0016570	PF03126	IPR004343, IPR018144			down
HORVU3Hr1G075960	MLOC_71020	Jacalin-related lectin 3	none	PF01419	IPR001229		down
HORVU3Hr1G076060	MLOC_7818	purple acid phosphatase 10	GO:0003993, GO:0016787, GO:0046872	PF00149, PF14008, PF16656	IPR004843, IPR008963, IPR015914, IPR025733, IPR029052			up	up
HORVU3Hr1G076400	unknown	undescribed protein	none	PF12734	IPR028144				up
HORVU3Hr1G076480	unknown	Insulin-degrading enzyme	GO:0003824, GO:0046872	PF05193, PF16187	IPR007863, IPR011237, IPR011249, IPR032632			down
HORVU3Hr1G076910	MLOC_62897	Rp1-like protein	GO:0043531	PF00931	IPR002182, IPR027417, IPR032675		down
HORVU3Hr1G076960	MLOC_68719	Eukaryotic translation initiation factor 3 subunit L	GO:0003743, GO:0005737, GO:0005852	PF10255	IPR019382	up	up
HORVU3Hr1G077040	MLOC_70143	Pentatricopeptide repeat-containing protein	GO:0005515	PF01535, PF12854, PF13041	IPR002885, IPR011990	up	up		up
HORVU3Hr1G077110	MLOC_39471	receptor kinase 2	GO:0004672, GO:0004674, GO:0005524, GO:0006468, GO:0048544	PF00954, PF01453, PF07714, PF08276	IPR000719, IPR000858, IPR001245, IPR001480, IPR002290, IPR003609, IPR008271, IPR011009, IPR013320, IPR024171	down	down
HORVU3Hr1G077130	MLOC_58022	receptor kinase 2	GO:0004672, GO:0004674, GO:0005524, GO:0006468, GO:0048544	PF00954, PF01453, PF07714, PF08276	IPR000719, IPR000858, IPR001245, IPR001480, IPR002290, IPR003609, IPR008271, IPR011009, IPR013320, IPR024171	down	down
HORVU3Hr1G077800	MLOC_38236	unknown function	none	none	none		up
HORVU3Hr1G077930	MLOC_71950	Nucleoredoxin	none	PF13905	IPR012336	up	up	up	up
HORVU3Hr1G078360	MLOC_62315	purple acid phosphatase 27	GO:0016787	PF00149	IPR004843, IPR029052			up	up
HORVU3Hr1G078650	MLOC_123	Nucleotide-sugar transporter family protein	none	PF03151	IPR004853			up
HORVU3Hr1G079230	MLOC_10849	Leucine-rich repeat protein kinase family protein	none	PF12819	IPR024788	down	down
HORVU3Hr1G079420	MLOC_66056	nodulin MtN21 /EamA-like transporter family protein	GO:0016020, GO:0016021	PF00892	IPR000620		down
HORVU3Hr1G079800	MLOC_74934	Non-specific lipid-transfer protein-like protein	none	PF14368	IPR016140				up
HORVU3Hr1G079860	MLOC_66714	Pentatricopeptide repeat-containing protein	GO:0005515, GO:0008270	PF01535, PF13041, PF13812, PF14432	IPR002885, IPR011990, IPR032867		up
HORVU3Hr1G080100	MLOC_70929	NAC domain containing protein 102	GO:0003677, GO:0006355	PF02365	IPR003441			down	down
HORVU3Hr1G080500	unknown	Cytochrome P450 superfamily protein	GO:0005506, GO:0016705, GO:0020037, GO:0055114	PF00067	IPR001128, IPR002401, IPR017972	down		down	down
HORVU3Hr1G080640	MLOC_2097	Auxin efflux carrier family protein	GO:0016021, GO:0055085	PF03547	IPR004776		up
HORVU3Hr1G080830	MLOC_4708	Cytochrome P450 superfamily protein	GO:0005506, GO:0016705, GO:0020037, GO:0055114	PF00067	IPR001128, IPR002401, IPR017972			up
HORVU3Hr1G081050	MLOC_36364	receptor kinase 2	GO:0004672, GO:0005515, GO:0005524, GO:0006468	PF00560, PF07714, PF13855	IPR000719, IPR001245, IPR001611, IPR003591, IPR011009, IPR017441, IPR032675				up
HORVU3Hr1G081180	MLOC_73204	expansin A1	GO:0005576, GO:0009664	PF01357, PF03330	IPR002963, IPR007112, IPR007117, IPR007118, IPR009009				up
HORVU3Hr1G081230	MLOC_74915	expansin A1	GO:0005576, GO:0009664	PF01357, PF03330	IPR002963, IPR007112, IPR007117, IPR007118, IPR009009	up	up		up
HORVU3Hr1G081610	MLOC_67856	amino acid permease 8	none	PF01490	IPR013057			down
HORVU3Hr1G082110	MLOC_212	Sec14p-like phosphatidylinositol transfer family protein	GO:0006810, GO:0016021	PF00650	IPR001251, IPR009038				up
HORVU3Hr1G082460	MLOC_71333	Protein NRT1/ PTR FAMILY 5.10	GO:0005215, GO:0006810, GO:0016020	PF00854	IPR000109, IPR020846	up
HORVU3Hr1G082640	MLOC_57043	cell wall / vacuolar inhibitor of fructosidase 2	GO:0004857	PF04043	IPR006501		down
HORVU3Hr1G082730	MLOC_55858	Photosystem II 22 kDa protein, chloroplastic	none	PF00504	IPR022796, IPR023329	up
HORVU3Hr1G083380	unknown	actin 7	none	PF00022	IPR004000, IPR004001, IPR020902	down
HORVU3Hr1G083740	MLOC_52982	myb-like transcription factor family protein	GO:0003677	PF00249	IPR001005, IPR006447, IPR009057, IPR017930	up	up	up
HORVU3Hr1G083760	MLOC_61916	Subtilisin-like protease	GO:0004252, GO:0006508	PF00082, PF05922	IPR000209, IPR009020, IPR010259, IPR015500, IPR023828			up
HORVU3Hr1G083990	MLOC_78355	unknown function	GO:0005488	none	IPR016024	up	up
HORVU3Hr1G084170	MLOC_5621	Glucan endo-1,3-beta-glucosidase 14	GO:0004553, GO:0005975	PF00332	IPR000490, IPR013781, IPR017853	down	down
HORVU3Hr1G084450	MLOC_2968	Cytochrome P450 superfamily protein	GO:0005506, GO:0016705, GO:0020037, GO:0055114	PF00067	IPR001128, IPR002401	up	up
HORVU3Hr1G084830	MLOC_8529	Nematode resistance protein-like HSPRO2	GO:0006952	PF07014, PF07231	IPR009743, IPR009869	down	down
HORVU3Hr1G085230	MLOC_63693	unknown function	none	none	none		down
HORVU3Hr1G085720	MLOC_66099	BEL1-like homeodomain 8	GO:0003677, GO:0006355	PF05920, PF07526	IPR001356, IPR006563, IPR008422, IPR009057		down
HORVU3Hr1G085760	MLOC_37765	Gamma-glutamyl phosphate reductase	GO:0003824, GO:0004349, GO:0004350, GO:0005737, GO:0006561, GO:0008152, GO:0016491, GO:0016620, GO:0055114	PF00171, PF00696	IPR000965, IPR001048, IPR001057, IPR005715, IPR005766, IPR015590, IPR016161, IPR016162, IPR016163, IPR019797, IPR020593	up	up	up	up
HORVU3Hr1G085930	MLOC_8131	Protein phosphatase 2C family protein	GO:0003824, GO:0043169	PF00481	IPR000222, IPR001932	up	up	up	up
HORVU3Hr1G086220	MLOC_39313	Calcium-dependent lipid-binding (CaLB domain) family protein	GO:0005515	PF00168	IPR000008				down
HORVU3Hr1G086240	MLOC_79334	Calcium-dependent lipid-binding (CaLB domain) family protein	GO:0005515	PF00168	IPR000008	down	down	down	down
HORVU3Hr1G086500	MLOC_72334	Heat shock 70 kDa protein	none	PF00012	IPR013126, IPR018181, IPR029047, IPR029048			up	up
HORVU3Hr1G086610	MLOC_65718	Histone H2B.6	GO:0000786, GO:0003677, GO:0046982	PF00125	IPR000558, IPR007125, IPR009072				down
HORVU3Hr1G087020	MLOC_64765	alpha/beta-Hydrolases superfamily protein	none	PF12146	IPR022742, IPR029058			down	down
HORVU3Hr1G087380	MLOC_78806	30S ribosomal protein S12	GO:0003735, GO:0005622, GO:0005840, GO:0006412, GO:0015935	PF00164	IPR005680, IPR006032, IPR012340	up		up
HORVU3Hr1G087470	MLOC_8502	serine carboxypeptidase-like 27	GO:0004185, GO:0006508	PF00450	IPR001563, IPR018202, IPR029058	up		up
HORVU3Hr1G087570	MLOC_67845	2-oxoglutarate (2OG) and Fe(II)-dependent oxygenase superfamily protein	none	PF14226	IPR026992, IPR027443	up	up
HORVU3Hr1G088050	MLOC_65901	S-adenosyl-L-methionine-dependent methyltransferases superfamily protein	GO:0008168	PF03141	IPR004159, IPR029063		down
HORVU3Hr1G089000	MLOC_19	4-coumarate--CoA ligase-like 5	GO:0003824, GO:0008152	PF00501, PF13193	IPR000873, IPR020845, IPR025110		down
HORVU3Hr1G089290	MLOC_14622	Late embryogenesis abundant protein Lea5-A	GO:0006950	PF03242	IPR004926	up	up
HORVU3Hr1G089300	unknown	Dehydrin DHN3	GO:0006950, GO:0009415	PF00257	IPR000167, IPR030513	up	up	up	up
HORVU3Hr1G089650	MLOC_49095	Rhodanese/Cell cycle control phosphatase superfamily protein	none	PF00581	IPR001763	up
HORVU3Hr1G089770	MLOC_24086	unknown function	none	none	none			down
HORVU3Hr1G090580	MLOC_3773	Protein root UVB sensitive 6	none	PF04884	IPR006968	up	up
HORVU3Hr1G091210	MLOC_35013	2-oxoglutarate (2OG) and Fe(II)-dependent oxygenase superfamily protein	GO:0016491, GO:0055114	PF03171, PF14226	IPR005123, IPR026992, IPR027443			up	up
HORVU3Hr1G091320	MLOC_61465	Acyl-[acyl-carrier-protein] 6-desaturase	GO:0006631, GO:0016491, GO:0045300, GO:0055114	PF03405	IPR005067, IPR009078, IPR012348		down
HORVU3Hr1G092680	MLOC_10218	Aldehyde dehydrogenase family 2 member C4	GO:0008152, GO:0016491, GO:0016620, GO:0055114	PF00171	IPR015590, IPR016160, IPR016161, IPR016162, IPR016163, IPR029510		up
HORVU3Hr1G092840	MLOC_52457	Pentatricopeptide repeat-containing protein	GO:0005515	PF01535, PF12854, PF13041, PF13812	IPR002885, IPR011990	up	up
HORVU3Hr1G092940	unknown	Chromosome 3B, genomic scaffold, cultivar Chinese Spring	none	none	none			down	down
HORVU3Hr1G093190	MLOC_63669	Subtilisin-like protease	GO:0004252, GO:0006508	PF00082, PF02225, PF05922	IPR000209, IPR003137, IPR010259, IPR015500, IPR023827, IPR023828			up	up
HORVU3Hr1G093260	MLOC_66361	Protein of unknown function (DUF506)	none	PF04720	IPR006502			up	up
HORVU3Hr1G093270	MLOC_72517	Cysteine proteinase inhibitor 4	GO:0004869	PF16845	IPR000010, IPR020381	up	up	up
HORVU3Hr1G093350	MLOC_55348	selenium-binding protein 1	GO:0005515, GO:0008430	PF05694	IPR008826, IPR015943	up	up	up
HORVU3Hr1G093380	MLOC_44948	THO complex subunit 2	none	none	none		up
HORVU3Hr1G093830	MLOC_18160	sucrose phosphate synthase 3F	GO:0005985, GO:0016157, GO:0046524	PF00534, PF00862, PF05116	IPR000368, IPR001296, IPR006380, IPR012819		up		up
HORVU3Hr1G094260	MLOC_19304	dynamin-related protein 3A	GO:0003924, GO:0005525	PF00350, PF01031, PF02212	IPR000375, IPR001401, IPR003130, IPR019762, IPR020850, IPR022812, IPR027417, IPR030381			down
HORVU3Hr1G094340	MLOC_61130	Chromosome 3B, genomic scaffold, cultivar Chinese Spring	none	PF03407	IPR005069				down
HORVU3Hr1G094660	MLOC_11137	Disease resistance protein	GO:0043531	PF00931	IPR002182, IPR027417, IPR032675				down
HORVU3Hr1G094730	MLOC_52321	Squamosa promoter-binding-like protein 2	GO:0003677, GO:0005634	PF03110	IPR004333		down
HORVU3Hr1G094820	MLOC_60122	thylakoid rhodanese-like	none	none	IPR001763			up
HORVU3Hr1G095090	MLOC_34961	MADS-box transcription factor family protein	GO:0003677, GO:0046983	PF00319	IPR002100		down
HORVU3Hr1G095200	MLOC_38000	MADS-box transcription factor family protein	GO:0003677, GO:0046983	PF00319	IPR002100	up	up		up
HORVU3Hr1G095400	MLOC_65229	TCP family transcription factor	none	PF03634	IPR005333, IPR017887		down		down
HORVU3Hr1G095700	MLOC_7328	metacaspase 1	GO:0004197, GO:0006508	PF00656	IPR011600, IPR029030		down
HORVU3Hr1G095790	unknown	Serine/threonine-protein kinase	none	PF01453	IPR001480	down	down
HORVU3Hr1G096210	MLOC_64806	Exostosin family protein	none	PF03016	IPR004263	down
HORVU3Hr1G096340	MLOC_9820	DNAJ heat shock N-terminal domain-containing protein	none	PF11926	IPR001623, IPR024593	up	down
HORVU3Hr1G096360	MLOC_58744	HXXXD-type acyl-transferase family protein	GO:0016747	PF02458	IPR003480, IPR023213				down
HORVU3Hr1G096680	MLOC_75299	Chromosome 3B, genomic scaffold, cultivar Chinese Spring	none	none	none	down	down	down
HORVU3Hr1G096760	unknown	Chromosome 3B, genomic scaffold, cultivar Chinese Spring	none	none	none	down			down
HORVU3Hr1G097140	MLOC_5412	Alcohol dehydrogenase	GO:0008270, GO:0016491, GO:0055114	PF00107, PF08240	IPR002328, IPR011032, IPR013149, IPR013154, IPR016040, IPR020843	down
HORVU3Hr1G097930	unknown	receptor lectin kinase	GO:0004672, GO:0005524, GO:0006468, GO:0030246	PF00139, PF07714	IPR000719, IPR001220, IPR001245, IPR011009, IPR013320, IPR017441, IPR019825		up		up
HORVU3Hr1G099080	unknown	Glutaredoxin family protein	GO:0009055, GO:0015035, GO:0045454	PF00462	IPR002109, IPR011905, IPR012336		down	down	down
HORVU3Hr1G099530	MLOC_34510	UDP-Glycosyltransferase superfamily protein	GO:0008152, GO:0016758	PF00201	IPR002213				down
HORVU3Hr1G099590	MLOC_1831	receptor kinase 2	GO:0004672, GO:0005524, GO:0006468	PF07714	IPR000719, IPR001245, IPR002290, IPR008271, IPR011009				down
HORVU3Hr1G103960	unknown	alpha/beta-Hydrolases superfamily protein	GO:0003824	PF00561	IPR000073, IPR000639, IPR029058			up
HORVU3Hr1G104940	MLOC_72157	Leucine-rich repeat receptor-like protein kinase family protein	GO:0005515	PF00560, PF08263	IPR001611, IPR013210, IPR032675		down	down	down
HORVU3Hr1G105290	MLOC_13908	Glucan endo-1,3-beta-glucosidase GI	GO:0004553, GO:0005975	PF00332	IPR000490, IPR013781, IPR017853	down	down	down	down
HORVU3Hr1G105420	MLOC_13908	Glucan endo-1,3-beta-glucosidase GI	GO:0004553, GO:0005975	PF00332	IPR000490, IPR013781, IPR017853	down	down		down
HORVU3Hr1G105600	MLOC_45485	Glucan endo-1,3-beta-glucosidase GI	GO:0004553, GO:0005975	PF00332	IPR000490, IPR013781, IPR017853	down	down		down
HORVU3Hr1G105720	MLOC_64376	B3 domain-containing protein	GO:0003677	PF02362	IPR003340, IPR015300		down
HORVU3Hr1G105790	MLOC_54810	Glucan endo-1,3-beta-glucosidase GI	GO:0004553, GO:0005975	PF00332	IPR000490, IPR013781, IPR017853	down	down		down
HORVU3Hr1G105860	MLOC_55134	annexin 5	GO:0005509, GO:0005544	PF00191	IPR001464, IPR018252, IPR018502			up
HORVU3Hr1G106450	MLOC_57721	Glutathione S-transferase family protein	GO:0005515	PF00043, PF13417	IPR004045, IPR004046, IPR010987, IPR012336			down	down
HORVU3Hr1G107240	MLOC_51093	Early-responsive to dehydration stress protein (ERD4)	GO:0016020	PF02714, PF13967	IPR003864, IPR032880	up	up	up
HORVU3Hr1G108100	MLOC_14726	carotenoid cleavage dioxygenase 1	none	PF03055	IPR004294			down	down
HORVU3Hr1G108120	MLOC_78266	Protein of unknown function (DUF579)	GO:0045492	PF04669	IPR006514, IPR021148			up
HORVU3Hr1G108540	MLOC_64100	Two-component response regulator ARR8	GO:0000160	PF00072	IPR001789, IPR011006			down	down
HORVU3Hr1G108630	MLOC_63402	unknown function	none	PF14009	IPR025322				down
HORVU3Hr1G108680	MLOC_36351	Transcription factor ORG2	GO:0046983	PF00010	IPR011598		up
HORVU3Hr1G108790	MLOC_9248	RNA ligase/cyclic nucleotide phosphodiesterase family protein	none	none	IPR009097	up	up
HORVU3Hr1G109010	MLOC_56446	receptor kinase 2	GO:0004672, GO:0005524, GO:0006468	PF07714	IPR000719, IPR001245, IPR002290, IPR008271, IPR011009, IPR013320	down	down
HORVU3Hr1G109230	MLOC_25632	calmodulin-like 38	GO:0005509	PF13499, PF13833	IPR002048, IPR011992, IPR018247				up
HORVU3Hr1G110440	MLOC_58449	Serine/threonine-protein kinase	none	PF01453	IPR001480, IPR003609	down	down
HORVU3Hr1G110850	MLOC_66148	Copine family protein 2	none	PF07002	IPR010734	down	down
HORVU3Hr1G111040	MLOC_4620	protein kinase family protein	GO:0004672, GO:0005524, GO:0006468	PF07714, PF12819	IPR000719, IPR001245, IPR002290, IPR008271, IPR011009, IPR013320, IPR017441, IPR024788		down
HORVU3Hr1G111080	unknown	Alpha-amylase/subtilisin inhibitor	GO:0004866	PF00197	IPR002160, IPR011065	down			down
HORVU3Hr1G112100	MLOC_8820	unknown function	none	none	none	up
HORVU3Hr1G113120	MLOC_79868	Wound-induced protein	GO:0042742, GO:0050832	PF00967	IPR001153, IPR009009, IPR018226			down	down
HORVU3Hr1G113620	unknown	Wound-induced protein	GO:0042742, GO:0050832	PF00967	IPR001153, IPR009009, IPR018226	down		down	down
HORVU3Hr1G113690	MLOC_13234	Disease resistance protein	GO:0043531	PF00931	IPR002182, IPR027417, IPR032675	up	up
HORVU3Hr1G114200	unknown	calreticulin 3	GO:0005509, GO:0005783, GO:0006457, GO:0051082	PF00262	IPR001580, IPR013320				down
HORVU3Hr1G114880	MLOC_28331	LRR receptor-like serine/threonine-protein kinase EFR	none	PF14111	IPR025558	up	up
HORVU3Hr1G115580	unknown	Haloacid dehalogenase-like hydrolase (HAD) superfamily protein	GO:0008152, GO:0016787	PF13419	IPR006439, IPR010237, IPR023214	up
HORVU3Hr1G115990	MLOC_59482	undescribed protein	none	none	none	down
HORVU3Hr1G116010	unknown	11S seed storage protein	GO:0045735	PF00190	IPR006044, IPR006045, IPR011051, IPR014710	down	down
HORVU3Hr1G116310	MLOC_44235	Cytochrome P450 superfamily protein	GO:0005506, GO:0016705, GO:0020037, GO:0055114	PF00067	IPR001128, IPR002401, IPR017972			up	up
HORVU3Hr1G116490	MLOC_60802	Pectin acetylesterase 5	GO:0016787	PF03283	IPR004963, IPR029058	down	down
HORVU3Hr1G116580	MLOC_69356	Inorganic pyrophosphatase	GO:0000287, GO:0004427, GO:0005737, GO:0006796	PF00719	IPR008162	down	down
HORVU3Hr1G116770	MLOC_73233	Caffeic acid 3-O-methyltransferase	GO:0008168, GO:0008171, GO:0046983	PF00891, PF08100	IPR001077, IPR011991, IPR012967, IPR016461, IPR029063	down	down	down	down
HORVU3Hr1G117190	MLOC_11370	Chaperone protein DnaJ	none	PF00226, PF11926	IPR001623, IPR024593	down	down
HORVU3Hr1G117370	unknown	Glutathione S-transferase family protein	GO:0005515	PF00043, PF02798	IPR004045, IPR004046, IPR010987, IPR012336			down	down
HORVU3Hr1G117440	MLOC_56924	23 kDa jasmonate-induced protein	none	none	none	down	down	down	down
HORVU3Hr1G117550	MLOC_70869	Jasmonate induced protein	none	none	none	down
HORVU3Hr1G117570	MLOC_70869	23 kDa jasmonate-induced protein	none	none	none	down	down	down	down
HORVU3Hr1G117590	MLOC_28169	23 kDa jasmonate-induced protein	none	none	none	down	down	down	down
HORVU4Hr1G000070	MLOC_18137	Poly(A) RNA polymerase protein 1	none	none	none				down
HORVU4Hr1G000100	MLOC_74904	phosphate transporter 4				up
HORVU4Hr1G000310	MLOC_12720	Disease resistance protein (CC-NBS-LRR class) family	GO:0043531	PF00931	IPR002182, IPR027417, IPR032675		down
HORVU4Hr1G000490	MLOC_70851	2-oxoglutarate (2OG) and Fe(II)-dependent oxygenase superfamily protein	GO:0016491, GO:0055114	PF03171, PF14226	IPR005123, IPR026992, IPR027443		down
HORVU4Hr1G000620	MLOC_5070	ATP binding cassette subfamily B1	GO:0005524, GO:0016887	PF00005, PF12848	IPR003439, IPR003593, IPR017871, IPR027417, IPR032781	up	up
HORVU4Hr1G000750	unknown	Histone H2B	GO:0000786, GO:0003677, GO:0046982	PF00125	IPR000558, IPR007125, IPR009072	up	up	down
HORVU4Hr1G001040	MLOC_18450	Leucine-rich repeat receptor-like protein kinase family protein	GO:0005515	PF00560	IPR001611, IPR032675	down
HORVU4Hr1G001350	MLOC_70914	60S ribosomal protein L1-A	GO:0003723	PF00687	IPR016094, IPR016095, IPR023673, IPR023674, IPR028364	up
HORVU4Hr1G001420	MLOC_52887	GDSL esterase/lipase	GO:0016788	PF00657	IPR001087, IPR013830	up
HORVU4Hr1G002240	MLOC_14178	Outward rectifying potassium channel protein	GO:0005267, GO:0005509, GO:0016020, GO:0071805	PF07885	IPR002048, IPR003280, IPR011992, IPR013099, IPR018247	up	up		up
HORVU4Hr1G002360	MLOC_4804	Glucan endo-1,3-beta-glucosidase 8	GO:0004553, GO:0005975	PF00332, PF07983	IPR000490, IPR012946, IPR013781, IPR017853	up	up
HORVU4Hr1G002650	MLOC_39318	Pathogenesis-related thaumatin superfamily protein	none	PF00314	IPR001938, IPR017949	down			down
HORVU4Hr1G002900	MLOC_4721	Protein of unknown function (DUF1677)	none	PF07911	IPR012876		down
HORVU4Hr1G003040	MLOC_51988	regulatory protein (NPR1)	GO:0005515	PF00651, PF11900, PF12313, PF13637	IPR000210, IPR002110, IPR011333, IPR020683, IPR021094, IPR024228		down
HORVU4Hr1G003090	unknown	Glucan endo-1,3-beta-glucosidase 7	GO:0004553, GO:0005975	PF00332, PF07983	IPR000490, IPR012946, IPR013781, IPR017853			up	up
HORVU4Hr1G003220	MLOC_56672	Endo-1,4-beta-xylanase C	GO:0004553, GO:0005975, GO:0016798	PF00331, PF02018	IPR001000, IPR003305, IPR008979, IPR013781, IPR017853, IPR031158	down	down
HORVU4Hr1G004160	MLOC_63465	Exostosin-2	GO:0006024, GO:0015012, GO:0016021	PF09258	IPR011040, IPR015338, IPR023296, IPR029044	down	down
HORVU4Hr1G004260	MLOC_55179	GMP synthase [glutamine-hydrolyzing]	none	PF00117	IPR017926, IPR029062	up
HORVU4Hr1G004800	MLOC_54406	Tetratricopeptide repeat (TPR)-like superfamily protein	GO:0005515	none	IPR011990			up
HORVU4Hr1G005500	MLOC_77398	50S ribosomal protein L18	GO:0003735, GO:0005622, GO:0005840, GO:0006412	PF00861	IPR005484		down
HORVU4Hr1G005670	MLOC_5869	Nuclear transcription factor Y subunit A-9	GO:0003677, GO:0003700, GO:0006355, GO:0016602	PF02045	IPR001289, IPR018362	up	up
HORVU4Hr1G005690	MLOC_17754	undescribed protein	GO:0050832	PF14861	IPR029227	up	up	up
HORVU4Hr1G005920	MLOC_55029	lipoxygenase 1	GO:0005515, GO:0016491, GO:0016702, GO:0046872, GO:0055114	PF00305, PF01477	IPR001024, IPR001246, IPR013819, IPR020833, IPR020834, IPR027433	down	down	up	up
HORVU4Hr1G006100	MLOC_50885	Haloacid dehalogenase-like hydrolase (HAD) superfamily protein	GO:0008152, GO:0016787	PF13419	IPR006439, IPR010237, IPR023214			up
HORVU4Hr1G006370	MLOC_75272	UDP-Glycosyltransferase superfamily protein	GO:0008152, GO:0016758	PF00201	IPR002213				down
HORVU4Hr1G006730	MLOC_57130	Plastid-lipid associated protein PAP / fibrillin family protein	none	PF04755	IPR006843	up
HORVU4Hr1G007190	MLOC_54945	Basic blue protein	GO:0009055	PF02298	IPR003245, IPR008972	down
HORVU4Hr1G007220	MLOC_65674	Basic blue protein	GO:0009055	PF02298	IPR003245, IPR008972, IPR028871	up		up	up
HORVU4Hr1G007260	MLOC_43140	unknown function	none	none	none	up
HORVU4Hr1G007420	MLOC_77970	Zinc finger protein CONSTANS-LIKE 16	GO:0005515, GO:0005622, GO:0008270	PF00643, PF06203	IPR000315, IPR010402			down
HORVU4Hr1G007550	MLOC_71608	receptor-like kinase 902	GO:0004672, GO:0005515, GO:0005524, GO:0006468	PF00069, PF08263, PF13855	IPR000719, IPR001611, IPR011009, IPR013210, IPR013320, IPR032675			up	up
HORVU4Hr1G008420	MLOC_70989	Bifunctional inhibitor/lipid-transfer protein/seed storage 2S albumin superfamily protein	none	PF14547	IPR016140, IPR027923	up	up	up	up
HORVU4Hr1G008440	MLOC_54654	65-kDa microtubule-associated protein 6	GO:0000226, GO:0000910, GO:0008017	PF03999	IPR007145		down	down
HORVU4Hr1G008550	MLOC_57218	alpha/beta-Hydrolases superfamily protein	none	PF12146	IPR022742, IPR029058		up
HORVU4Hr1G008980	MLOC_16989	GRAS family transcription factor	none	PF03514	IPR005202				down
HORVU4Hr1G009190	MLOC_70444	Sec14p-like phosphatidylinositol transfer family protein	GO:0005215, GO:0005622, GO:0006810	PF00650, PF03765	IPR001071, IPR001251, IPR011074	down
HORVU4Hr1G009970	MLOC_56117	Transcription factor bHLH74	GO:0046983	PF00010	IPR011598			down
HORVU4Hr1G010770	MLOC_4690	unknown protein					down
HORVU4Hr1G010910	MLOC_37834	Transducin family protein / WD-40 repeat family protein	GO:0005515	PF00400	IPR001680, IPR011047, IPR015943, IPR017986			down
HORVU4Hr1G011110	MLOC_19148	glycerol-3-phosphate acyltransferase 6	GO:0008152, GO:0016746	PF01553, PF12710	IPR002123, IPR023214	down	down
HORVU4Hr1G011170	MLOC_63741	Pentatricopeptide repeat-containing protein	GO:0005515	PF01535, PF13041	IPR002885, IPR011990		down	up	up
HORVU4Hr1G011510	MLOC_55034	Serine/threonine-protein kinase SMG1	GO:0000184, GO:0004674, GO:0005488, GO:0005515, GO:0016310, GO:0016773	PF00454, PF02260, PF15785	IPR000403, IPR003152, IPR011009, IPR016024, IPR018936, IPR031559		down
HORVU4Hr1G012010	MLOC_80071	Transducin/WD40 repeat-like superfamily protein	GO:0005515	none	IPR001680, IPR011047, IPR015943	up	up
HORVU4Hr1G012540	MLOC_56220	O-methyltransferase family protein	GO:0008168, GO:0008171, GO:0046983	PF00891, PF08100	IPR001077, IPR011991, IPR012967, IPR016461, IPR029063	down	down
HORVU4Hr1G013210	MLOC_47250	Gibberellin-regulated family protein	none	PF02704	IPR003854	up		up
HORVU4Hr1G013460	MLOC_51405	zinc-finger protein 2	GO:0046872	PF13912	IPR007087, IPR015880			up	up
HORVU4Hr1G013660	MLOC_62025	calcium-transporting ATPase, putative	none	PF00689	IPR006068, IPR023298			up
HORVU4Hr1G013780	MLOC_53538	Mitochondrial transcription termination factor family protein	GO:0003690, GO:0005739, GO:0006355	PF02536	IPR003690	down	down	down
HORVU4Hr1G013840	MLOC_18785	2-oxoglutarate (2OG) and Fe(II)-dependent oxygenase superfamily protein	GO:0005506, GO:0016491, GO:0055114	PF03171, PF14226	IPR002283, IPR005123, IPR026992, IPR027443	up	up	up
HORVU4Hr1G014660	MLOC_13610	Plant regulator RWP-RK family protein	GO:0005515	PF00564, PF02042	IPR000270, IPR003035	up	up
HORVU4Hr1G014690	MLOC_60561	Subtilisin-like protease	GO:0004252, GO:0006508	PF00082	IPR000209, IPR023828	up	up
HORVU4Hr1G015040	MLOC_5720	Polyketide cyclase/dehydrase and lipid transport superfamily protein	GO:0008289	PF01852	IPR002913, IPR023393			down	down
HORVU4Hr1G015320	MLOC_68701	cyclin-dependent kinase C					down
HORVU4Hr1G015890	unknown	receptor kinase 1	GO:0004672, GO:0005524, GO:0006468	PF00069	IPR000719, IPR002290, IPR008271, IPR011009, IPR013320, IPR017441	down	down		down
HORVU4Hr1G016190	unknown	60S ribosomal protein L10-1	GO:0003735, GO:0005622, GO:0005840, GO:0006412	PF00252	IPR001197, IPR016180		up
HORVU4Hr1G016500	MLOC_69227	tapetum determinant 1	none	none	none		down		up
HORVU4Hr1G016510	MLOC_16607	Chaperone protein DnaJ	none	PF00226	IPR001623		down
HORVU4Hr1G016590	MLOC_10159	Disease resistance-responsive (dirigent-like protein) family protein	none	PF03018	IPR004265	down	down
HORVU4Hr1G016730	MLOC_70573	Carboxypeptidase Y	GO:0004185, GO:0006508	PF00450	IPR001563, IPR018202, IPR029058			down	down
HORVU4Hr1G016880	MLOC_57881	receptor kinase 2	GO:0004672, GO:0005524, GO:0006468, GO:0030246	PF00069, PF00139	IPR000719, IPR001220, IPR002290, IPR008271, IPR011009, IPR013320, IPR017441, IPR019825	down	down
HORVU4Hr1G017030	MLOC_36662	GDP-L-galactose phosphorylase 2	none	PF16269	none	down
HORVU4Hr1G017260	unknown	unknown protein				up	up
HORVU4Hr1G017390	MLOC_13635	Eukaryotic aspartyl protease family protein	GO:0004190, GO:0006508	PF14541, PF14543	IPR001969, IPR021109, IPR032799, IPR032861			down	down
HORVU4Hr1G017450	MLOC_12946	Aldehyde dehydrogenase family 3 member H1	GO:0004030, GO:0006081, GO:0008152, GO:0016491, GO:0016620, GO:0055114	PF00171	IPR012394, IPR015590, IPR016161, IPR016162, IPR016163	down
HORVU4Hr1G018670	MLOC_68151	B3 domain-containing protein	GO:0003677	PF02362	IPR003340, IPR015300				down
HORVU4Hr1G019490	MLOC_37499	Leucine-rich repeat receptor-like protein kinase family protein	GO:0004672, GO:0005515, GO:0005524, GO:0006468	PF00069, PF00560, PF08263, PF13855	IPR000719, IPR001611, IPR002290, IPR003591, IPR008271, IPR011009, IPR013210, IPR013320, IPR017441, IPR032675	down	down
HORVU4Hr1G019520	MLOC_69909	forkhead-associated (FHA) domain-containing protein	GO:0005515	PF00498, PF13638	IPR000253, IPR002716, IPR008984, IPR029060			down
HORVU4Hr1G019530	MLOC_38029	calcium-dependent protein kinase 2	GO:0004672, GO:0005509, GO:0005524, GO:0006468	PF00069, PF13499	IPR000719, IPR002048, IPR002290, IPR008271, IPR011009, IPR011992, IPR017441, IPR018247	down
HORVU4Hr1G019890	MLOC_64234	C2H2-like zinc finger protein	GO:0003950, GO:0046872	none	IPR007087, IPR012317				down
HORVU4Hr1G020000	MLOC_64995	receptor-like protein kinase 4	GO:0004672, GO:0005524, GO:0006468	PF00069	IPR000719, IPR002290, IPR008271, IPR011009, IPR013320, IPR017441	down	down
HORVU4Hr1G021040	MLOC_19974	exocyst subunit exo70 family protein A2	GO:0000145, GO:0006887	PF03081	IPR004140, IPR016159				down
HORVU4Hr1G021720	MLOC_15316	G-box binding factor 3	GO:0003700, GO:0006355, GO:0043565	PF00170	IPR004827	up	up
HORVU4Hr1G021990	unknown	F-box only protein 7	GO:0005515	PF03478, PF12937	IPR001810, IPR005174			down
HORVU4Hr1G022280	MLOC_49954	Peroxidase superfamily protein	GO:0004601, GO:0006979, GO:0020037, GO:0055114	PF00141	IPR000823, IPR002016, IPR010255, IPR019794				up
HORVU4Hr1G023490	MLOC_6120	cyclin-dependent kinase B1						up
HORVU4Hr1G023550	MLOC_81178	exostosin family protein	none	PF03016	IPR004263	up
HORVU4Hr1G024470	MLOC_17525	Staphylococcal nuclease homologue	none	PF00565	IPR016071	down	down
HORVU4Hr1G024710	MLOC_64329	Clathrin, heavy chain	GO:0005488, GO:0005515, GO:0006886, GO:0016192	PF00637	IPR000547, IPR011990, IPR016024, IPR016341			down
HORVU4Hr1G026030	MLOC_20537	Calcium-binding EF-hand family protein	GO:0005509	none	IPR002048, IPR011992, IPR018247				up
HORVU4Hr1G026300	MLOC_75484	serine/threonine protein kinase 1	GO:0004672, GO:0005524, GO:0006468, GO:0007165	PF00069, PF03822	IPR000719, IPR002290, IPR004041, IPR008271, IPR011009, IPR017441, IPR018451, IPR028375	down	down
HORVU4Hr1G027180	MLOC_63454	proline transporter 1	none	PF01490	IPR013057			down	down
HORVU4Hr1G027260	MLOC_70817	Ribulose bisphosphate carboxylase/oxygenase activase A, chloroplastic	GO:0005524	PF00004	IPR003959, IPR027417		down		up
HORVU4Hr1G027270	MLOC_1290	acyl-CoA dehydrogenase-related	none	none	none	up
HORVU4Hr1G027740	MLOC_20723	Glucan endo-1,3-beta-glucosidase	GO:0004553, GO:0005975	PF00332, PF07983	IPR000490, IPR012946, IPR013781, IPR017853			up
HORVU4Hr1G028810	MLOC_16587	pectinesterase 11	GO:0005618, GO:0030599, GO:0042545	PF01095	IPR000070, IPR011050, IPR012334, IPR018040	up
HORVU4Hr1G029150	MLOC_45887	Protein kinase domain containing protein	none	none	none	up
HORVU4Hr1G029760	unknown	GTPase HflX	none	PF13167, PF16360	IPR025121, IPR032305		up
HORVU4Hr1G031600	unknown	DNA mismatch repair protein MutL	none	none	IPR003594				down
HORVU4Hr1G033200	MLOC_77840	translationally controlled tumor protein	none	PF00838	IPR011057, IPR011323, IPR018103, IPR018105	up
HORVU4Hr1G034650	MLOC_3982	Protein ABERRANT POLLEN TRANSMISSION 1	none	PF10351	IPR019443	up	up		up
HORVU4Hr1G036280	MLOC_51447	Cystathionine gamma-synthase 1, chloroplastic	GO:0003824, GO:0030170	PF01053	IPR000277, IPR015421, IPR015424			up
HORVU4Hr1G042710	unknown	MATE efflux family protein	none	none	none	up	up	up	up
HORVU4Hr1G043120	MLOC_16534	Paladin	none	PF14566	IPR029021	down	down		down
HORVU4Hr1G043680	MLOC_58471	amino acid permease 3	none	PF01490	IPR013057	up	up	up
HORVU4Hr1G043990	MLOC_53810	unknown function	none	none	none			up	up
HORVU4Hr1G044140	MLOC_63857	Processive diacylglycerol beta-glucosyltransferase	GO:0009247, GO:0016758	PF04101, PF06925	IPR007235, IPR009695				up
HORVU4Hr1G046610	MLOC_72579	Heavy metal transport/detoxification superfamily protein	GO:0030001, GO:0046872	PF00403	IPR006121		down
HORVU4Hr1G046730	unknown	DENN (AEX-3) domain-containing protein	none	none	none	up
HORVU4Hr1G047560	MLOC_24849	pumilio 12	GO:0003723, GO:0005488	none	IPR001313, IPR011989, IPR016024	down	down	down	down
HORVU4Hr1G049500	MLOC_64793	sucrose synthase 3	GO:0005985, GO:0016157	PF00534, PF00862	IPR000368, IPR001296, IPR012820	up	up
HORVU4Hr1G049990	MLOC_19115	Nucleotidyltransferase domain containing protein, expressed	none	none	none	up
HORVU4Hr1G050190	MLOC_60045	Basic-leucine zipper (bZIP) transcription factor family protein	GO:0003700, GO:0006355, GO:0043565	PF00170	IPR004827				up
HORVU4Hr1G050210	MLOC_57363	Vicilin-like antimicrobial peptides 2-3	GO:0045735	PF00190	IPR006045, IPR011051, IPR014710	up	up	up	up
HORVU4Hr1G050230	MLOC_20059	Pentatricopeptide repeat-containing protein	GO:0005515	PF01535, PF13041	IPR002885, IPR011990		down
HORVU4Hr1G050930	MLOC_36799	Cytochrome P450 superfamily protein	GO:0005506, GO:0016705, GO:0020037, GO:0055114	PF00067	IPR001128, IPR002401, IPR017972	down	down	down	down
HORVU4Hr1G050990	MLOC_51461	calmodulin like 42	GO:0005509	PF13405, PF13499	IPR002048, IPR011992, IPR018247			down	down
HORVU4Hr1G051010	MLOC_7661	Phosphoglycerate mutase, 2,3-bisphosphoglycerate-independent	GO:0003824, GO:0004619, GO:0005737, GO:0006007, GO:0008152, GO:0030145, GO:0046872	PF01676, PF06415	IPR005995, IPR006124, IPR011258, IPR017849, IPR017850	up	up	up	up
HORVU4Hr1G051120	unknown	protein kinase family protein	GO:0004672, GO:0005524, GO:0006468	PF07714	IPR000719, IPR001245, IPR002290, IPR008271, IPR011009, IPR013320, IPR017441		down
HORVU4Hr1G051400	MLOC_60937	thioredoxin F2	GO:0045454	PF00085	IPR012336, IPR013766		up		up
HORVU4Hr1G052170	MLOC_64388	alpha-L-arabinofuranosidase 1	GO:0046373, GO:0046556	PF06964	IPR008979, IPR010720, IPR017853	down
HORVU4Hr1G052350	MLOC_79070	glucose-6-phosphate dehydrogenase 4	GO:0004345, GO:0006006, GO:0050661, GO:0055114	PF00479, PF02781	IPR001282, IPR016040, IPR022674, IPR022675			up
HORVU4Hr1G052450	MLOC_16176	Hexosyltransferase	GO:0016757	PF01501	IPR002495, IPR029044		up	up	up
HORVU4Hr1G052890	MLOC_25698	NADH dehydrogenase [ubiquinone] 1 alpha subcomplex subunit 5	GO:0005743, GO:0016651, GO:0022904	PF04716	IPR006806			up
HORVU4Hr1G053530	MLOC_13679	PsbB mRNA maturation factor Mbb1, chloroplastic	GO:0005515, GO:0005622, GO:0006396	PF07719	IPR003107, IPR011990, IPR013026, IPR013105, IPR019734	up
HORVU4Hr1G054000	MLOC_60015	Bromodomain and WD repeat-containing protein 1	GO:0005515	none	IPR001487	up
HORVU4Hr1G054190	MLOC_68361	N-terminal protein myristoylation	none	PF14009	IPR025322			down	down
HORVU4Hr1G054200	MLOC_77034	Adenine nucleotide alpha hydrolases-like superfamily protein	GO:0006950	PF00582	IPR006015, IPR006016, IPR014729	up	up	up
HORVU4Hr1G054210	MLOC_18326	acyl-CoA synthetase 5	GO:0003824, GO:0008152	PF00501, PF13193	IPR000873, IPR020845, IPR025110			up
HORVU4Hr1G054770	MLOC_52864	COBRA-like protein 7	GO:0010215, GO:0016049, GO:0031225	PF04833	IPR006918			up	up
HORVU4Hr1G054870	MLOC_57345	Major pollen allergen Bet v 1-F/I	GO:0006952, GO:0009607	PF00407	IPR000916, IPR023393, IPR024949			up	up
HORVU4Hr1G054910	MLOC_25125	xyloglucan xylosyltransferase 5	GO:0016021, GO:0016757	PF05637	IPR008630			up	up
HORVU4Hr1G055220	MLOC_71349	Abscisic acid receptor PYR1	none	PF10604	IPR019587, IPR023393	down	down	down	down
HORVU4Hr1G055800	MLOC_56128	Gamma-interferon-inducible lysosomal thiol reductase	none	PF03227	IPR004911	up
HORVU4Hr1G055910	MLOC_53998	Importin subunit beta-1	GO:0005488, GO:0006886, GO:0008536	PF03810, PF13513	IPR001494, IPR011989, IPR016024	down	down
HORVU4Hr1G056210	MLOC_55971	Protein phosphatase 2C family protein	GO:0003824, GO:0043169	PF00481	IPR000222, IPR001932			up	up
HORVU4Hr1G056250	MLOC_11278	TRICHOME BIREFRINGENCE-LIKE 45	none	PF13839, PF14416	IPR025846, IPR026057	down
HORVU4Hr1G057000	MLOC_38447	Low temperature and salt responsive protein family	GO:0016021	PF01679	IPR000612	up	up	up	up
HORVU4Hr1G057790	MLOC_51494	Protein of unknown function (DUF810)	none	PF05664	IPR008528, IPR014770, IPR014772	down	down	down
HORVU4Hr1G057890	MLOC_64920	Glutathione S-transferase family protein	GO:0005515	PF13410, PF13417	IPR004045, IPR010987, IPR012336	up	up	up
HORVU4Hr1G058560	MLOC_22791	Plant protein 1589 of unknown function	none	PF09713	IPR006476		up	down	down
HORVU4Hr1G058930	MLOC_48115	proton pump interactor 1	none	none	none			up
HORVU4Hr1G059120	MLOC_61200	UDP-glucose 4-epimerase	none	PF04321, PF16363	IPR016040, IPR029903	up		up	up
HORVU4Hr1G059130	MLOC_66511	UDP-glucuronic acid decarboxylase 3	none	PF16363	IPR016040	down
HORVU4Hr1G059270	MLOC_52193	Glyoxalase family protein, expressed	none	PF00903	IPR004360, IPR029068	up	up		up
HORVU4Hr1G059510	MLOC_76327	Ribosomal protein S4	none	none	none				up
HORVU4Hr1G059710	MLOC_56747	ankyrin repeat family protein	GO:0005515, GO:0008270	PF13637, PF13857	IPR001841, IPR002110, IPR013083, IPR020683			down
HORVU4Hr1G060130	MLOC_22541	RING/U-box superfamily protein	GO:0005515, GO:0008270	PF06547, PF13639, PF14369	IPR001841, IPR010543, IPR013083	up		up
HORVU4Hr1G060150	MLOC_63613	Hsp70 nucleotide exchange factor fes1	GO:0005488	PF08609	IPR011989, IPR013918, IPR016024				up
HORVU4Hr1G060760	MLOC_2337	17.9 kDa class I heat shock protein	none	PF00011	IPR002068, IPR008978	up	up	up	up
HORVU4Hr1G060880	unknown	SH3 domain-containing protein	GO:0005488, GO:0005515	PF00018	IPR001452, IPR011989, IPR016024			up
HORVU4Hr1G061070	MLOC_55252	C2H2-like zinc finger protein	GO:0003950, GO:0046872	none	IPR007087, IPR012317				up
HORVU4Hr1G062440	MLOC_51128	Phosphoenolpyruvate carboxykinase [ATP]	GO:0004611, GO:0004612, GO:0005524, GO:0006094, GO:0017076	PF01293	IPR001272, IPR008210, IPR013035, IPR015994	up
HORVU4Hr1G063190	MLOC_60978	Early light-induced protein, chloroplastic	none	PF00504	IPR022796, IPR023329	up	up	up	up
HORVU4Hr1G063270	MLOC_43885	Filament-like plant protein 4	none	PF05911	IPR008587			up
HORVU4Hr1G063350	MLOC_77985	heat shock protein 21	none	PF00011	IPR002068, IPR008978	up	up	up	up
HORVU4Hr1G063420	MLOC_20110	3-ketoacyl-CoA synthase 1	GO:0003824, GO:0006633, GO:0008152, GO:0008610, GO:0016020, GO:0016747	PF08392, PF08541	IPR012392, IPR013601, IPR013747, IPR016039			up	up
HORVU4Hr1G063490	MLOC_51845	Proline-rich protein, putative, expressed	none	PF01190	none	down	down
HORVU4Hr1G063590	MLOC_68234	Chaperone protein DnaJ	none	PF00226	IPR001623, IPR018253				down
HORVU4Hr1G063790	MLOC_80672	Endo-1,4-beta-xylanase Z	GO:0004553, GO:0005975	PF00331	IPR001000, IPR013781, IPR017853			up	up
HORVU4Hr1G063980	MLOC_3813	Senescence/dehydration-associated protein-related	none	PF06911	IPR009686	up	up
HORVU4Hr1G064790	MLOC_63275	glutamate decarboxylase	GO:0003824, GO:0004351, GO:0006536, GO:0016831, GO:0019752, GO:0030170	PF00282	IPR002129, IPR010107, IPR015421, IPR015424	down	down	down	down
HORVU4Hr1G064950	MLOC_62332	peroxidase 2	GO:0004601, GO:0006979, GO:0020037, GO:0055114	PF00141	IPR000823, IPR002016, IPR010255, IPR019793	down	down		up
HORVU4Hr1G065010	MLOC_67541	LEM3 (ligand-effect modulator 3) family protein / CDC50 family protein	GO:0006950	PF00582	IPR006016, IPR014729			up
HORVU4Hr1G066090	MLOC_6568	Lecithin-cholesterol acyltransferase-like 1	GO:0006629, GO:0008374	PF02450	IPR003386, IPR029058		down
HORVU4Hr1G066310	MLOC_53519	Wall-associated receptor kinase-like 14	none	none	none	down
HORVU4Hr1G066480	MLOC_39711	Two-component response regulator ORR21	GO:0000160, GO:0003677, GO:0003700, GO:0007165	PF00072, PF00249	IPR001005, IPR001789, IPR006447, IPR009057, IPR011006, IPR017053, IPR017930	down	down
HORVU4Hr1G067020	MLOC_62525	Caleosin-related family protein	none	PF05042	IPR007736				down
HORVU4Hr1G067340	MLOC_51583	3-ketoacyl-CoA synthase 6	GO:0003824, GO:0006633, GO:0008152, GO:0008610, GO:0016020, GO:0016747	PF08392, PF08541	IPR012392, IPR013601, IPR013747, IPR016039			up	up
HORVU4Hr1G067410	MLOC_18330	Sec14p-like phosphatidylinositol transfer family protein	none	PF00650	IPR001251, IPR011074	down	down
HORVU4Hr1G067840	MLOC_69325	GDP-mannose transporter GONST3	none	PF03151	IPR004853			up
HORVU4Hr1G068760	MLOC_5787	Hexosyltransferase	GO:0016757	PF01501	IPR002495, IPR029044			down
HORVU4Hr1G070320	MLOC_13692	Uncharacterised conserved protein (UCP012943)	none	none	none	up
HORVU4Hr1G070870	MLOC_3350	Protein kinase family protein	GO:0004672, GO:0005509, GO:0005515, GO:0005524, GO:0006468, GO:0030247	PF07645, PF07714, PF13947	IPR000152, IPR000719, IPR000742, IPR001245, IPR001881, IPR002290, IPR008271, IPR011009, IPR013320, IPR017441, IPR018097, IPR025287	down
HORVU4Hr1G070900	unknown	unknown protein					down
HORVU4Hr1G070970	MLOC_17049	Vicilin-like antimicrobial peptides 2-2	GO:0045735	PF00190	IPR006045, IPR011051, IPR014710	up	up
HORVU4Hr1G072300	MLOC_70158	FAD/NAD(P)-binding oxidoreductase family protein	GO:0016491, GO:0055114, GO:0071949	PF01494	IPR002938, IPR023753	down	down
HORVU4Hr1G072830	MLOC_4280	Plant protein of unknown function (DUF639)	none	PF04842	IPR006927	up	up
HORVU4Hr1G073230	MLOC_76765	unknown protein				up		up	up
HORVU4Hr1G074470	MLOC_67130	glycerol-3-phosphate acyltransferase 6	GO:0008152, GO:0016746	none	IPR002123, IPR023214		down		down
HORVU4Hr1G074620	MLOC_1893	amine oxidase 1	GO:0005507, GO:0008131, GO:0009308, GO:0048038, GO:0055114	PF01179, PF02727, PF02728	IPR000269, IPR015798, IPR015800, IPR015802, IPR016182	down	down
HORVU4Hr1G074740	MLOC_9778	Major facilitator superfamily domain-containing protein 12	none	PF13347	IPR020846	up	up
HORVU4Hr1G075110	MLOC_24707	unknown function	none	PF05627	IPR008700				up
HORVU4Hr1G075710	MLOC_34840	60S ribosomal protein L4-1	GO:0003735, GO:0005840, GO:0006412	PF00573, PF14374	IPR002136, IPR013000, IPR023574, IPR025755			up
HORVU4Hr1G076040	MLOC_69433	Dirigent protein 1	none	PF03018	IPR004265		down	up	up
HORVU4Hr1G076120	unknown	Protein BIG GRAIN 1	none	none	none			down
HORVU4Hr1G076600	MLOC_70610	Protein LURP-one-related 6	none	PF04525	IPR007612, IPR025659		down
HORVU4Hr1G076970	unknown	Cyanate hydratase	GO:0003677	none	IPR010982				down
HORVU4Hr1G077300	MLOC_39668	Bowman-Birk type trypsin inhibitor	GO:0004867, GO:0005576	PF00228	IPR000877		down
HORVU4Hr1G077310	MLOC_13305	Ethylene-responsive transcription factor 1	GO:0003677, GO:0003700, GO:0006355	PF00847	IPR001471, IPR016177		down
HORVU4Hr1G077510	MLOC_5701	Divalent metal cation transporter MntH	GO:0005215, GO:0006810, GO:0016020	PF01566	IPR001046			up	up
HORVU4Hr1G078010	MLOC_59790	Eukaryotic aspartyl protease family protein	none	PF14541, PF14543	IPR021109, IPR032799, IPR032861		down
HORVU4Hr1G078310	unknown	undescribed protein	none	none	none			up	up
HORVU4Hr1G078400	MLOC_46016	unknown function	none	none	none			up	up
HORVU4Hr1G078470	MLOC_43049	alcohol dehydrogenase 1	GO:0008270, GO:0016491, GO:0055114	PF00107, PF08240	IPR002328, IPR011032, IPR013149, IPR013154, IPR016040	down	down
HORVU4Hr1G078610	MLOC_13471	Mitochondrial import inner membrane translocase subunit Tim17/Tim22/Tim23 family protein	none	none	none		up
HORVU4Hr1G079030	MLOC_15348	Xyloglucan galactosyltransferase KATAMARI1 homolog	none	PF03016	IPR004263	up	up	up	up
HORVU4Hr1G079460	MLOC_55032	Leucine-rich receptor-like protein kinase family protein	GO:0004672, GO:0005515, GO:0005524, GO:0006468	PF00069, PF00560, PF08263, PF13855	IPR000719, IPR001611, IPR002290, IPR003591, IPR008271, IPR011009, IPR013210, IPR017441, IPR032675	up	up
HORVU4Hr1G079600	unknown	undescribed protein	none	none	none	up	up
HORVU4Hr1G079710	MLOC_69350	Divalent ion symporter	GO:0016021, GO:0055085	PF03600	IPR004680	up	up
HORVU4Hr1G080460	MLOC_15181	GRAS family transcription factor	none	PF03514	IPR005202	up	up		up
HORVU4Hr1G080780	MLOC_73342	sterol methyltransferase 2	GO:0006694, GO:0008152, GO:0008168	PF08241, PF08498	IPR013216, IPR013705, IPR029063, IPR030384			up
HORVU4Hr1G080810	MLOC_13520	Late embryogenesis abundant protein D-7	none	none	none		up
HORVU4Hr1G080820	MLOC_13519	Group 3 late embryogenesis abundant protein	none	none	none	up	up
HORVU4Hr1G081040	MLOC_68581	ABC transporter G family member 45	GO:0005524, GO:0016020, GO:0016887	PF00005, PF01061, PF08370, PF14510	IPR003439, IPR003593, IPR013525, IPR013581, IPR017871, IPR027417, IPR029481		down	down
HORVU4Hr1G081290	MLOC_51984	4-coumarate:CoA ligase 5	GO:0003824, GO:0008152	PF00501, PF13193	IPR000873, IPR020845, IPR025110	down	down
HORVU4Hr1G081330	MLOC_12009	Boron transporter 4	GO:0006820, GO:0016021	PF00955	IPR011531	down			down
HORVU4Hr1G082040	MLOC_76546	catalase 2	GO:0004096, GO:0006979, GO:0020037, GO:0055114	PF00199, PF06628	IPR002226, IPR010582, IPR011614, IPR018028, IPR020835, IPR024708, IPR024711	up	up
HORVU4Hr1G082390	MLOC_8329	Defensin-like protein 1	GO:0006952	PF00304	IPR003614, IPR008176, IPR008177		down
HORVU4Hr1G082400	MLOC_7716	Defensin-like protein	GO:0006952	PF00304	IPR003614, IPR008176, IPR008177			up
HORVU4Hr1G082740	MLOC_72756	RING/U-box superfamily protein	GO:0005515, GO:0008270	PF13639	IPR001841, IPR013083		down
HORVU4Hr1G083080	MLOC_62498	serine/threonine protein kinase 1	GO:0004672, GO:0005524, GO:0006468, GO:0007165	PF00069, PF03822	IPR000719, IPR002290, IPR004041, IPR008271, IPR011009, IPR017441, IPR018451		down
HORVU4Hr1G083200	MLOC_67679	unknown function	none	none	none		up
HORVU4Hr1G083650	MLOC_73967	Protein NRT1/ PTR FAMILY 5.2	GO:0005215, GO:0006810, GO:0016020	PF00854	IPR000109, IPR020846	down	down	down	down
HORVU4Hr1G084230	MLOC_40261	Tetratricopeptide repeat (TPR)-like superfamily protein	GO:0005515	none	IPR011990, IPR013026	up
HORVU4Hr1G084390	MLOC_44584	beta-amylase 1	GO:0000272, GO:0005975, GO:0016161	PF01373	IPR001371, IPR001554, IPR013781, IPR017853, IPR018238	up	up	up	up
HORVU4Hr1G084400	MLOC_11974	Methyltransferase family protein	none	PF08242, PF10294	IPR013217, IPR019410, IPR029063				down
HORVU4Hr1G084680	MLOC_66788	Homeobox protein knotted-1-like 3	GO:0003677, GO:0005634, GO:0006355	PF03789, PF03790, PF03791, PF05920	IPR001356, IPR005539, IPR005540, IPR005541, IPR008422, IPR009057				up
HORVU4Hr1G084740	MLOC_18334	sugar transporter 1	GO:0005215, GO:0016020, GO:0016021, GO:0022857, GO:0022891, GO:0055085	PF00083	IPR003663, IPR005828, IPR005829, IPR020846		down		down
HORVU4Hr1G084810	MLOC_59596	2-oxoglutarate (2OG) and Fe(II)-dependent oxygenase superfamily protein	GO:0016491, GO:0055114	PF03171, PF14226	IPR005123, IPR026992, IPR027443		down	down	down
HORVU4Hr1G084830	MLOC_22377	50S ribosomal protein L11	GO:0003735, GO:0005840, GO:0006412	PF00298, PF03946	IPR000911, IPR006519, IPR020783, IPR020784, IPR020785				up
HORVU4Hr1G085120	MLOC_60797	Protein of unknown function, DUF538	none	PF04398	IPR007493				up
HORVU4Hr1G085140	MLOC_18292	Remorin family protein	none	PF03763	IPR005516				down
HORVU4Hr1G085250	MLOC_71237	Aquaporin-like superfamily protein	GO:0005215, GO:0006810, GO:0016020	PF00230	IPR000425, IPR022357, IPR023271	up	up	up
HORVU4Hr1G085930	MLOC_55415	Protein kinase superfamily protein	none	PF03881	IPR011009, IPR016477			down
HORVU4Hr1G085990	MLOC_30573	Cysteine-rich receptor-like protein kinase 25	none	PF01657	IPR002902	down	down
HORVU4Hr1G086050	MLOC_61612	12-oxophytodienoate reductase 2	GO:0003824, GO:0010181, GO:0016491, GO:0055114	PF00724	IPR001155, IPR013785			up	up
HORVU4Hr1G086300	MLOC_64782	Beta-fructofuranosidase, insoluble isoenzyme 1	GO:0004553, GO:0005975	PF00251, PF08244	IPR001362, IPR013148, IPR013189, IPR013320, IPR018053, IPR023296				down
HORVU4Hr1G086320	MLOC_72732	Palmitoyl-protein thioesterase 1	GO:0098599	PF02089	IPR002472, IPR029058				down
HORVU4Hr1G086360	MLOC_79748	NAD(P)-binding Rossmann-fold superfamily protein	GO:0008152, GO:0016491	PF00106	IPR002198, IPR016040			up
HORVU4Hr1G086500	MLOC_5021	respiratory burst oxidase homolog B	GO:0004601, GO:0005509, GO:0016020, GO:0016491, GO:0050664, GO:0055114	PF01794, PF08022, PF08030, PF08414	IPR000778, IPR002048, IPR011992, IPR013112, IPR013121, IPR013130, IPR013623, IPR017927, IPR017938, IPR018247				down
HORVU4Hr1G087070	MLOC_45394	expansin B2	GO:0005576, GO:0019953	PF01357, PF03330	IPR005795, IPR007112, IPR007117, IPR007118, IPR009009	up
HORVU4Hr1G087210	MLOC_74374	unknown function	none	PF14309	IPR025486	up	up
HORVU4Hr1G087230	MLOC_16300	Ectonucleoside triphosphate diphosphohydrolase 5	GO:0016787	PF01150	IPR000407	down	down
HORVU4Hr1G087350	MLOC_60425	UPF0187 protein YneE	none	PF01062	IPR021134	up	up
HORVU4Hr1G087580	MLOC_73706	Chromosome 3B, genomic scaffold, cultivar Chinese Spring	GO:0046983	none	IPR011598	up
HORVU4Hr1G087840	MLOC_38291	Protein of unknown function (DUF1218)	none	PF06749	IPR009606			down	down
HORVU4Hr1G088280	MLOC_39421	GATA transcription factor 2	GO:0003700, GO:0006355, GO:0008270, GO:0043565	PF00320	IPR000679, IPR013088		up	up	up
HORVU4Hr1G088650	MLOC_66975	protein kinase family protein	GO:0004672, GO:0004842, GO:0005524, GO:0006468, GO:0016567	PF00069, PF04564	IPR000719, IPR002290, IPR003613, IPR008271, IPR011009, IPR013083, IPR014729, IPR017441	up
HORVU4Hr1G088670	unknown	unknown function	none	none	none	up			up
HORVU4Hr1G088860	MLOC_79857	Major facilitator superfamily protein	GO:0015098, GO:0015689, GO:0016021	PF05631	IPR008509, IPR020846		down
HORVU4Hr1G089200	MLOC_31846	Protein kinase superfamily protein	GO:0004672, GO:0005524, GO:0006468	PF00069	IPR000719, IPR002290, IPR008271, IPR011009, IPR017441			up	up
HORVU4Hr1G089350	MLOC_9793	WD repeat-containing protein 6	GO:0005515	none	IPR001680, IPR011047, IPR015943, IPR017986, IPR019775			down
HORVU4Hr1G089490	MLOC_74398	Non-specific lipid-transfer protein 2G	none	PF14368	IPR016140	up
HORVU4Hr1G090260	unknown	unknown function	none	none	none		down	down
HORVU4Hr1G090810	MLOC_55646	sterol C4-methyl oxidase 1-2	GO:0005506, GO:0006633, GO:0016491, GO:0055114	PF04116	IPR006694			down
HORVU4Hr1G090850	MLOC_67158	Heat stress transcription factor C-2a	GO:0003700, GO:0005634, GO:0006355, GO:0043565	PF00447	IPR000232, IPR011991	up	up	up	up
HORVU5Hr1G000970	unknown	Cox19-like CHCH family protein	none	none	IPR009069	down	down
HORVU5Hr1G001290	unknown	undescribed protein	none	none	none	up	up
HORVU5Hr1G001670	MLOC_4742	Early-responsive to dehydration stress protein (ERD4)	GO:0016020	PF02714, PF13967	IPR003864, IPR032880	down	down
HORVU5Hr1G001750	MLOC_16331	undescribed protein	none	PF06749	IPR009606	up	up	up
HORVU5Hr1G002090	MLOC_67937	basic helix-loop-helix (bHLH) DNA-binding superfamily protein	GO:0046983	PF00010	IPR011598		down
HORVU5Hr1G002340	unknown	unknown function	none	none	none	down	down	down	down
HORVU5Hr1G004490	MLOC_68131	Chaperonin-like RbcX protein	none	none	none	up	up
HORVU5Hr1G005180	MLOC_75397	Pathogenesis-related thaumatin superfamily protein	none	PF00314	IPR001938, IPR017949	down	down		down
HORVU5Hr1G005240	MLOC_50740	thaumatin-like protein 3	none	PF00314	IPR001938, IPR017949				down
HORVU5Hr1G005290	MLOC_20378	Thaumatin-like protein	none	PF00314	IPR001938				down
HORVU5Hr1G005310	MLOC_2781	Pathogenesis-related thaumatin superfamily protein	none	PF00314	IPR001938		down
HORVU5Hr1G005510	MLOC_2781	Thaumatin-like protein TLP5	none	none	IPR001938	down	down
HORVU5Hr1G006330	unknown	Glutathione S-transferase family protein	none	PF00043	IPR004046, IPR010987			up	up
HORVU5Hr1G006900	MLOC_62833	cationic amino acid transporter 2	GO:0003333, GO:0015171, GO:0016020	PF13520, PF13906	IPR002293, IPR029485	down
HORVU5Hr1G007680	MLOC_65406	unknown protein					down	down
HORVU5Hr1G007770	MLOC_62496	tropinone reductase	GO:0008152, GO:0016491	PF00106	IPR002198, IPR002347, IPR016040, IPR020904	up
HORVU5Hr1G007870	unknown	F-box/RNI-like superfamily protein	GO:0005515	none	IPR001810, IPR032675			down
HORVU5Hr1G009410	MLOC_74917	F-box domain containing protein	GO:0005515	PF00646	IPR001810		down	down
HORVU5Hr1G009620	MLOC_57358	GPI mannosyltransferase 3	GO:0016757	PF03901	IPR005599		up
HORVU5Hr1G009840	MLOC_11868	RAB GDP dissociation inhibitor 2	GO:0005093, GO:0015031, GO:0016491, GO:0055114	PF00996	IPR000806, IPR018203, IPR023753	down	down	down
HORVU5Hr1G010120	MLOC_2275	Protein WIR1A	none	none	none			down	down
HORVU5Hr1G010420	MLOC_66828	glutamate receptor 2.7	GO:0004930, GO:0004970, GO:0005234, GO:0007186, GO:0016020, GO:0016021	PF01094, PF10613	IPR000337, IPR001320, IPR001828, IPR019594, IPR028082	down	down
HORVU5Hr1G010960	MLOC_58790	Glutaredoxin family protein	GO:0009055, GO:0015035, GO:0045454	PF00462	IPR002109, IPR011905, IPR012336	up	up
HORVU5Hr1G011090	MLOC_7408	unknown function	none	none	none		down
HORVU5Hr1G011540	MLOC_6861	2-oxoglutarate (2OG) and Fe(II)-dependent oxygenase superfamily protein	GO:0016491, GO:0055114	PF03171, PF14226	IPR005123, IPR026992, IPR027443		up
HORVU5Hr1G011570	MLOC_15954	Stomatal closure-related actin-binding protein 1	GO:0003779	PF16709, PF16711, PF16712	IPR032009, IPR032012, IPR032015			down
HORVU5Hr1G012010	MLOC_36607	receptor kinase 2	GO:0004672, GO:0005524, GO:0006468	PF00069, PF01657	IPR000719, IPR002290, IPR002902, IPR008271, IPR011009, IPR013320, IPR017441				down
HORVU5Hr1G012240	MLOC_25763	Glucan 1,3-beta-glucosidase	GO:0004553, GO:0005975	PF00150	IPR001547, IPR008999, IPR013781, IPR017853, IPR018087	down		down	down
HORVU5Hr1G013880	MLOC_78716	Cytochrome P450 superfamily protein	GO:0005506, GO:0016705, GO:0020037, GO:0055114	PF00067	IPR001128, IPR002401, IPR017972	up
HORVU5Hr1G014170	MLOC_81003	Basic-leucine zipper (bZIP) transcription factor family protein	GO:0003700, GO:0006355, GO:0043565	PF00170, PF12498	IPR004827, IPR020983	down	down	down	down
HORVU5Hr1G014730	MLOC_7150	alanine aminotransferase 2	GO:0003824	none	IPR015422, IPR015424			up	up
HORVU5Hr1G015010	unknown	dihydroflavonol 4-reductase-like1	none	none	IPR016040				up
HORVU5Hr1G016730	MLOC_10335	Protein kinase superfamily protein	GO:0004672, GO:0005524, GO:0006468, GO:0030247	PF07714, PF13947	IPR000719, IPR001245, IPR002290, IPR008271, IPR011009, IPR013320, IPR017441, IPR025287	down	down
HORVU5Hr1G017120	MLOC_35167	SAUR-like auxin-responsive protein family	GO:0009733	PF02519	IPR003676	down	down
HORVU5Hr1G017450	MLOC_66004	B3 domain-containing protein	GO:0003677	PF02362	IPR003340, IPR015300		up
HORVU5Hr1G018700	MLOC_29827	ERD (early-responsive to dehydration stress) family protein	GO:0016020	PF02714, PF13967	IPR003864, IPR032880	up	up		up
HORVU5Hr1G018790	MLOC_75857	Cytochrome P450 superfamily protein	GO:0005506, GO:0016705, GO:0020037, GO:0055114	PF00067	IPR001128, IPR002401, IPR017972	up	up
HORVU5Hr1G018830	MLOC_52590	zinc finger protein 7	GO:0046872	none	IPR007087			down	down
HORVU5Hr1G018930	MLOC_2994	Protein phosphatase 2C family protein	GO:0003824, GO:0043169	PF00481	IPR000222, IPR001932			up	up
HORVU5Hr1G019110	MLOC_81956	Amino acid permease family protein	GO:0003333, GO:0015171, GO:0016020	PF13520	IPR002293			up	up
HORVU5Hr1G019650	MLOC_15027	Heparanase-like protein 1	GO:0016020, GO:0016798	PF03662	IPR005199, IPR017853			down	down
HORVU5Hr1G020040	MLOC_11796	Pentatricopeptide repeat-containing protein	GO:0005515	PF01535, PF13041	IPR002885, IPR011990	up	up	up
HORVU5Hr1G020530	MLOC_21507	receptor kinase 2	GO:0004672, GO:0005524, GO:0006468, GO:0030246	PF00069, PF00139	IPR000719, IPR001220, IPR002290, IPR008271, IPR011009, IPR013320, IPR017441			up	up
HORVU5Hr1G021050	MLOC_15700	XH/XS domain-containing protein	none	PF03469	IPR005379		down
HORVU5Hr1G021070	unknown	undescribed protein	none	none	none	up	up	up	up
HORVU5Hr1G021340	MLOC_67219	Rubredoxin-like superfamily protein	GO:0005506, GO:0046872	PF00301	IPR004039, IPR018527, IPR024934, IPR024935	up
HORVU5Hr1G021770	unknown	undescribed protein	none	none	none			up	up
HORVU5Hr1G023530	MLOC_58645	Calmodulin-binding protein	GO:0005516, GO:0006950	PF07887	IPR012416		down
HORVU5Hr1G023910	unknown	Genomic DNA, chromosome 3, TAC clone: K7L4	none	none	none		down
HORVU5Hr1G024400	MLOC_65527	Calmodulin-binding protein	GO:0005516, GO:0006950	PF07887	IPR012416				down
HORVU5Hr1G024550	MLOC_5633	respiratory burst oxidase homologue D	GO:0004601, GO:0005509, GO:0016020, GO:0016491, GO:0050664, GO:0055114	PF01794, PF08022, PF08030, PF08414	IPR000778, IPR002048, IPR011992, IPR013112, IPR013121, IPR013130, IPR013623, IPR017927, IPR017938, IPR018247		down
HORVU5Hr1G026640	MLOC_80410	ankyrin repeat family protein	GO:0005515	PF00515, PF12796, PF13414, PF13606, PF13637	IPR001440, IPR002110, IPR011990, IPR013026, IPR019734, IPR020683	up
HORVU5Hr1G026650	MLOC_57143	histone H2A 2	GO:0000786, GO:0003677, GO:0005634, GO:0046982	PF00125, PF16211	IPR002119, IPR007125, IPR009072, IPR032454, IPR032458			up	up
HORVU5Hr1G032100	unknown	undescribed protein	none	none	none		up
HORVU5Hr1G032650	MLOC_37101	Chaperone protein dnaK	GO:0005524, GO:0006457, GO:0051082	PF00012	IPR012725, IPR013126, IPR018181, IPR029047, IPR029048			up
HORVU5Hr1G034180	MLOC_4811	Chloroplast-targeted copper chaperone protein	none	none	none		up
HORVU5Hr1G034830	MLOC_45055	WRKY family transcription factor	GO:0003700, GO:0006355, GO:0043565	PF03106	IPR003657	down	down
HORVU5Hr1G037990	MLOC_60385	Leucine-rich repeat receptor-like protein kinase family protein	GO:0004672, GO:0005515, GO:0005524, GO:0006468	PF00069, PF13855	IPR000719, IPR001611, IPR003591, IPR011009, IPR032675	down
HORVU5Hr1G039240	MLOC_38162	exocyst subunit exo70 family protein C2	GO:0000145, GO:0006887	PF03081	IPR004140, IPR016159		up		up
HORVU5Hr1G040360	MLOC_21993	unknown function	none	none	none				down
HORVU5Hr1G040620	MLOC_56530	auxin response factor 17	GO:0003677	PF02362	IPR003340, IPR015300	up	up
HORVU5Hr1G041390	MLOC_56473	Leucine-rich repeat receptor-like protein kinase family protein	GO:0005515, GO:0005524	PF00560, PF08263, PF13855	IPR001611, IPR011009, IPR013210, IPR017441, IPR032675	down	down
HORVU5Hr1G041400	unknown	Phytosulfokines 2	GO:0005576, GO:0008083, GO:0008283	PF06404	IPR009438	up
HORVU5Hr1G041660	unknown	protein kinase family protein	GO:0004672, GO:0005524, GO:0006468	PF07714, PF12819	IPR000719, IPR001245, IPR002290, IPR008271, IPR011009, IPR013320, IPR017441, IPR024788, IPR032675	down	down		down
HORVU5Hr1G042080	MLOC_60742	Hippocampus abundant transcript-like protein 1	GO:0005215, GO:0016021, GO:0055085	PF07690	IPR005829, IPR011701, IPR020846	down	down
HORVU5Hr1G042230	MLOC_35818	Protein TERMINAL FLOWER 1	none	PF01161	IPR001858, IPR008914		down	up	up
HORVU5Hr1G042290	MLOC_5856	alpha/beta-Hydrolases superfamily protein	none	none	IPR029058	down	down
HORVU5Hr1G042330	MLOC_44739	unknown protein						down
HORVU5Hr1G042740	MLOC_16831	UDP-Glycosyltransferase superfamily protein	GO:0008152, GO:0016758	PF00201	IPR002213	down	down
HORVU5Hr1G043080	MLOC_34262	DNA-directed RNA polymerase V subunit 5A	GO:0003677, GO:0003899, GO:0005634, GO:0006351	PF01191, PF03871	IPR000783, IPR005571, IPR014381			down	down
HORVU5Hr1G043200	MLOC_16297	strictosidine synthase-like 2	GO:0009058, GO:0016844	PF03088	IPR011042, IPR018119	down	down
HORVU5Hr1G043220	MLOC_61451	Ankyrin repeat family protein, putative, expressed	none	none	none		down
HORVU5Hr1G043640	MLOC_20538	calcium-transporting ATPase, putative	GO:0000166, GO:0005388, GO:0005524, GO:0016020, GO:0016021, GO:0046872, GO:0070588	PF00122, PF00689, PF00690, PF12710	IPR001757, IPR004014, IPR006068, IPR006408, IPR008250, IPR018303, IPR023214, IPR023298, IPR023299			down
HORVU5Hr1G044460	MLOC_78536	purple acid phosphatase 23	GO:0003993, GO:0016787, GO:0046872	PF00149, PF14008, PF16656	IPR004843, IPR008963, IPR015914, IPR025733, IPR029052				up
HORVU5Hr1G044550	MLOC_72770	calcium-dependent protein kinase 17	GO:0004672, GO:0005509, GO:0005524, GO:0006468	PF00069, PF13499	IPR000719, IPR002048, IPR002290, IPR008271, IPR011009, IPR011992, IPR017441, IPR018247	down	down	down
HORVU5Hr1G044640	MLOC_66563	zinc induced facilitator-like 1	GO:0016021, GO:0055085	PF07690	IPR011701, IPR020846	down	down
HORVU5Hr1G045300	MLOC_57845	ENHANCED DOWNY MILDEW 2	GO:0005515, GO:0008270	none	IPR001965, IPR013083			up	up
HORVU5Hr1G045580	unknown	mini zinc finger 2	none	PF04770	IPR006456			down
HORVU5Hr1G045640	MLOC_5832	NAC domain protein,	GO:0003677, GO:0006355	PF02365	IPR003441		down		down
HORVU5Hr1G045650	MLOC_4747	NAC domain protein,	GO:0003677, GO:0006355	PF02365	IPR003441			up	up
HORVU5Hr1G045690	MLOC_39203	Basic-leucine zipper (bZIP) transcription factor family protein	GO:0003700, GO:0006355, GO:0043565	PF00170	IPR004827			down
HORVU5Hr1G045750	MLOC_28088	actin depolymerizing factor 11	GO:0003779, GO:0005622	PF00241	IPR002108, IPR029006	up	up	up	up
HORVU5Hr1G045800	MLOC_31822	beta galactosidase 9	GO:0004553, GO:0005975, GO:0030246	PF02140	IPR000922, IPR001944, IPR008979	up			up
HORVU5Hr1G045860	MLOC_44302	Zinc finger CCCH domain-containing protein 53	GO:0000166, GO:0003676, GO:0003723, GO:0046872	PF00076, PF16131	IPR000504, IPR000571, IPR002004, IPR012677, IPR032297			down
HORVU5Hr1G045990	MLOC_57124	Bifunctional protein HldE	GO:0003824, GO:0009058	PF01467	IPR004821, IPR014729	up	up
HORVU5Hr1G046160	MLOC_66368	Protein LURP-one-related 8	none	PF04525	IPR007612, IPR025659		down
HORVU5Hr1G046240	MLOC_19453	Late embryogenesis abundant (LEA) hydroxyproline-rich glycoprotein family	none	PF03168	IPR004864				up
HORVU5Hr1G046250	MLOC_62501	RING/U-box superfamily protein	GO:0005515, GO:0008270	PF13639	IPR001841, IPR013083	down
HORVU5Hr1G046480	MLOC_5324	Chalcone--flavonone isomerase	GO:0009813, GO:0016872, GO:0045430	PF02431	IPR016087, IPR016088	down	down
HORVU5Hr1G047480	MLOC_54246	laccase 12	GO:0005507, GO:0016491, GO:0046274, GO:0048046, GO:0052716, GO:0055114	PF00394, PF07731	IPR001117, IPR002355, IPR008972, IPR011706, IPR017761	down	down
HORVU5Hr1G047610	MLOC_5148	LOB domain-containing protein 4	none	PF03195	IPR004883	up	up
HORVU5Hr1G047630	MLOC_51715	TRICHOME BIREFRINGENCE-LIKE 34	none	PF13839, PF14416	IPR025846, IPR026057		down
HORVU5Hr1G048100	MLOC_63089	Asparagine synthetase [glutamine-hydrolyzing]	GO:0004066, GO:0006529	PF00733, PF13537	IPR001962, IPR006426, IPR014729, IPR017932, IPR029055	up	up	up
HORVU5Hr1G048660	MLOC_75411	unknown function	none	none	none			down	down
HORVU5Hr1G048810	MLOC_74189	Coffea canephora DH200=94 genomic scaffold, scaffold_93	none	none	none		down		down
HORVU5Hr1G049260	MLOC_60553	glutamate receptor 3.3	GO:0004970, GO:0016020	PF00060	IPR001320	down	down	down	down
HORVU5Hr1G050120	MLOC_35016	undescribed protein	none	none	none	up	up	up	up
HORVU5Hr1G050140	MLOC_35016	undescribed protein	none	none	none	up	up	up	up
HORVU5Hr1G051160	MLOC_65122	Tyrosine phosphatase family protein	GO:0004725	PF03162	IPR004861, IPR020428, IPR029021	up			up
HORVU5Hr1G051310	MLOC_7324	Kelch-like protein 7	GO:0005515	PF01344, PF13418	IPR006652, IPR015915	down
HORVU5Hr1G052240	MLOC_15224	40S ribosomal protein S19	GO:0003735, GO:0005622, GO:0005840, GO:0006412	PF01090	IPR001266, IPR011991, IPR018277	up
HORVU5Hr1G052650	MLOC_7219	Late embryogenesis abundant (LEA) hydroxyproline-rich glycoprotein family	none	PF03168	IPR004864		up
HORVU5Hr1G052760	unknown	Heavy metal transport/detoxification superfamily protein	none	none	none			down	down
HORVU5Hr1G053010	MLOC_68318	Enoyl-[acyl-carrier-protein] reductase [NADH] 1	none	PF13561	IPR002347, IPR016040			up	up
HORVU5Hr1G053270	MLOC_75003	Rhodanese-like domain-containing protein 10	none	PF00581	IPR001763		down
HORVU5Hr1G053480	MLOC_6715	Protein FLUORESCENT IN BLUE LIGHT, chloroplastic	GO:0005515	PF13424	IPR011990, IPR013026				up
HORVU5Hr1G053950	unknown	Bifunctional aspartokinase/homoserine dehydrogenase 1	GO:0004072, GO:0004412, GO:0006520, GO:0008152, GO:0008652, GO:0009067, GO:0016491, GO:0016597, GO:0050661, GO:0055114	PF00696, PF00742, PF01842, PF03447	IPR001048, IPR001341, IPR001342, IPR002912, IPR005106, IPR011147, IPR016040, IPR018042, IPR019811			down	down
HORVU5Hr1G054820	MLOC_558	TPX2 (targeting protein for Xklp2) protein family	none	PF06886	IPR027329	down	down		down
HORVU5Hr1G055060	MLOC_70768	IAA-amino acid hydrolase ILR1-like 9	GO:0008152, GO:0016787	PF01546, PF07687	IPR002933, IPR011650, IPR017439			up	up
HORVU5Hr1G055570	MLOC_78536	purple acid phosphatase 23	GO:0003993, GO:0016787, GO:0046872	PF00149, PF14008, PF16656	IPR004843, IPR008963, IPR015914, IPR025733, IPR029052				up
HORVU5Hr1G055850	MLOC_76410	sugar transporter 14	GO:0005215, GO:0016020, GO:0016021, GO:0022857, GO:0022891, GO:0055085	PF00083	IPR003663, IPR005828, IPR005829, IPR020846				down
HORVU5Hr1G055950	MLOC_52081	Cysteine-rich venom protein	GO:0005576	PF00188	IPR001283, IPR002413, IPR014044, IPR018244	down	down		down
HORVU5Hr1G056040	MLOC_52081	Cysteine-rich venom protein	GO:0005576	PF00188	IPR001283, IPR002413, IPR014044, IPR018244	down	down		down
HORVU5Hr1G056390	MLOC_65636	Galactose mutarotase-like superfamily protein	GO:0003824, GO:0005975, GO:0016853, GO:0030246	PF01263	IPR008183, IPR011013, IPR014718	down
HORVU5Hr1G056490	MLOC_10243	Leucine-rich receptor-like protein kinase family protein	GO:0004672, GO:0005515, GO:0005524, GO:0006468	PF00069, PF00560, PF08263, PF13855	IPR000719, IPR001611, IPR002290, IPR003591, IPR008271, IPR011009, IPR013210, IPR032675			down	down
HORVU5Hr1G056610	MLOC_56164	Leucine-rich repeat transmembrane protein kinase	none	none	none	down	down	down	down
HORVU5Hr1G056780	unknown	Syntaxin-71	GO:0005515	none	IPR000727				down
HORVU5Hr1G057090	MLOC_53566	alcohol dehydrogenase 1	GO:0055114	PF00107, PF08240	IPR011032, IPR013149, IPR013154, IPR016040	down	down	down	down
HORVU5Hr1G057590	MLOC_9891	Oxygen-dependent choline dehydrogenase	GO:0016491, GO:0016614, GO:0050660, GO:0055114	PF00732, PF05199	IPR000172, IPR007867, IPR012132, IPR023753	down	down	down
HORVU5Hr1G057800	MLOC_60022	L-ascorbate oxidase	GO:0005507, GO:0016491, GO:0055114	PF00394, PF07731	IPR001117, IPR002355, IPR008972, IPR011706				down
HORVU5Hr1G057840	MLOC_16647	Protein of unknown function (DUF581)	none	PF04570	IPR007650		down
HORVU5Hr1G058300	MLOC_49094	trehalose-6-phosphate phosphatase	GO:0003824, GO:0005992	PF02358	IPR003337, IPR006379, IPR023214		down
HORVU5Hr1G058400	MLOC_58165	Protein SCO1 homolog 2, mitochondrial	none	PF02630	IPR003782, IPR012336				down
HORVU5Hr1G058910	unknown	strictosidine synthase-like 3	GO:0009058, GO:0016844	PF03088	IPR011042, IPR018119			down
HORVU5Hr1G059000	MLOC_39028	TRICHOME BIREFRINGENCE-LIKE 27	none	PF13839	IPR026057			up
HORVU5Hr1G059070	MLOC_80035	Protein kinase superfamily protein	GO:0004672, GO:0005524, GO:0006468	PF00069	IPR000719, IPR008271, IPR011009, IPR013320, IPR017441			down
HORVU5Hr1G059140	MLOC_60376	unknown protein				up	up
HORVU5Hr1G059160	MLOC_14191	unknown function	GO:0046983	none	IPR011598			up	up
HORVU5Hr1G059280	MLOC_75094	U-box domain-containing protein 19	GO:0004842, GO:0005488, GO:0005515, GO:0016567	PF00514, PF04564	IPR000225, IPR003613, IPR011989, IPR013083, IPR016024	up	up	up	up
HORVU5Hr1G059530	MLOC_14475	Protein CHAPERONE-LIKE PROTEIN OF POR1, chloroplastic	none	PF11833	IPR001623, IPR021788				up
HORVU5Hr1G059690	MLOC_72259	N-terminal protein myristoylation	none	PF14009	IPR025322			up	up
HORVU5Hr1G059900	MLOC_65382	zinc finger (AN1-like) family protein	GO:0008270	PF01428	IPR000058				up
HORVU5Hr1G060620	MLOC_60747	Centromere protein V	GO:0008152, GO:0016846	PF04828	IPR006913, IPR011057			up	up
HORVU5Hr1G061120	MLOC_63374	agenet domain-containing protein / bromo-adjacent homology (BAH) domain-containing protein	GO:0003682	PF01426, PF05641	IPR001025, IPR008395, IPR014002	down
HORVU5Hr1G061930	MLOC_68303	Cytochrome P450 superfamily protein	GO:0005506, GO:0016705, GO:0020037, GO:0055114	PF00067	IPR001128, IPR002401, IPR017972		down		down
HORVU5Hr1G062040	MLOC_61654	Protein SCAI	GO:0003714, GO:0006351	PF12070	IPR016607, IPR022709	up
HORVU5Hr1G062090	MLOC_72011	Aldehyde dehydrogenase family 7 member A1	GO:0008152, GO:0016491, GO:0016620, GO:0055114	PF00171	IPR015590, IPR016161, IPR016162, IPR016163, IPR029510			up
HORVU5Hr1G062410	MLOC_38683	Hypersensitive-induced response protein 1	none	PF01145	IPR001107	down	down	down	down
HORVU5Hr1G062510	MLOC_9949	Dormancy/auxin associated family protein	none	PF05564	IPR008406	up	up
HORVU5Hr1G062620	unknown	Jasmonate-induced protein, putative	none	PF03018	IPR004265	down
HORVU5Hr1G062720	MLOC_50052	SAUR-like auxin-responsive protein family	GO:0009733	PF02519	IPR003676			down	down
HORVU5Hr1G062850	MLOC_15960	Late embryogenesis abundant (LEA) hydroxyproline-rich glycoprotein family	none	PF03168	IPR004864		down	down
HORVU5Hr1G063530	MLOC_1974	glutamate receptor 1.3	none	PF00497	IPR001638	down	down
HORVU5Hr1G063630	MLOC_26864	Early light-induced protein 1, chloroplastic	none	PF00504	IPR022796, IPR023329		up
HORVU5Hr1G064080	MLOC_19713	Eukaryotic aspartyl protease family protein	none	PF14541, PF14543	IPR021109, IPR032799, IPR032861	down	down
HORVU5Hr1G064230	MLOC_68431	Cellulose synthase family protein	GO:0005515, GO:0008270, GO:0016020, GO:0016760, GO:0030244	PF03552, PF14569	IPR001841, IPR005150, IPR013083, IPR027934, IPR029044		down
HORVU5Hr1G065330	MLOC_52149	cinnamoyl coa reductase 1	GO:0003824, GO:0050662	PF01370	IPR001509, IPR016040	down
HORVU5Hr1G065370	MLOC_67101	serine/threonine protein kinase 1	GO:0004672, GO:0005524, GO:0006468, GO:0007165	PF00069, PF03822	IPR000719, IPR002290, IPR004041, IPR008271, IPR011009, IPR017441, IPR018451	up		up	up
HORVU5Hr1G065380	MLOC_60890	WRKY family transcription factor	GO:0003700, GO:0006355, GO:0043565	PF03106	IPR003657	down	down
HORVU5Hr1G065420	MLOC_4945	WRKY family transcription factor	GO:0003700, GO:0006355, GO:0043565	PF03106	IPR003657	down	down	down	down
HORVU5Hr1G066190	MLOC_40225	unknown function	none	none	none	down
HORVU5Hr1G066280	MLOC_44755	Chlorophyll a-b binding protein 1B-20, chloroplastic	none	PF00504	IPR022796, IPR023329	up
HORVU5Hr1G066920	MLOC_44410	anaerobic respiration	none	none	none		down	up	up
HORVU5Hr1G067010	MLOC_77955	Homeobox-leucine zipper protein family	GO:0003677, GO:0003700, GO:0006355, GO:0043565	PF00046, PF02183	IPR001356, IPR003106, IPR009057, IPR017970		down
HORVU5Hr1G067200	MLOC_54705	RING/U-box superfamily protein	GO:0005515, GO:0008270	PF13639	IPR001841, IPR013083	up	up
HORVU5Hr1G067310	MLOC_52080	Cytochrome P450 superfamily protein	GO:0005506, GO:0016705, GO:0020037, GO:0055114	PF00067	IPR001128	up	up
HORVU5Hr1G067360	MLOC_49690	Cytochrome P450 superfamily protein	GO:0005506, GO:0016705, GO:0020037, GO:0055114	PF00067	IPR001128, IPR002401, IPR017972	down	down
HORVU5Hr1G067390	MLOC_45107	unknown protein							up
HORVU5Hr1G067490	MLOC_43332	1-aminocyclopropane-1-carboxylate oxidase 1	GO:0016491, GO:0055114	PF03171, PF14226	IPR005123, IPR026992, IPR027443	down	down
HORVU5Hr1G067930	MLOC_9954	hydroxyproline-rich glycoprotein family protein	none	none	none	up	up
HORVU5Hr1G068940	MLOC_72547	receptor kinase 2	GO:0004672, GO:0005524, GO:0006468	PF00069	IPR000719, IPR002290, IPR008271, IPR011009, IPR013320, IPR017441		down
HORVU5Hr1G069050	MLOC_20338	Glucan endo-1,3-beta-glucosidase 5	GO:0004553, GO:0005975	PF00332, PF07983	IPR000490, IPR012946, IPR013781, IPR017853		down
HORVU5Hr1G069110	MLOC_6324	alpha/beta-Hydrolases superfamily protein	GO:0008152, GO:0016787	PF07859	IPR013094, IPR029058	up
HORVU5Hr1G069360	MLOC_62259	Protein of unknown function (DUF1264)	none	PF06884	IPR010686	up	up	up	up
HORVU5Hr1G069600	MLOC_57103	carbonic anhydrase 2	GO:0004089, GO:0008270, GO:0015976	PF00484	IPR001765, IPR015892				up
HORVU5Hr1G069620	MLOC_58115	Ubiquitin carboxyl-terminal hydrolase 17	GO:0006511, GO:0016579, GO:0036459	PF00443	IPR001394, IPR018200, IPR028889			down	down
HORVU5Hr1G070160	MLOC_10776	Glycogen debranching enzyme	GO:0003824, GO:0004553, GO:0005975, GO:0043169	PF00128, PF02922	IPR004193, IPR006047, IPR006589, IPR013780, IPR013781, IPR013783, IPR014756, IPR017853		up
HORVU5Hr1G070360	MLOC_15712	Protein kinase family protein	GO:0004672, GO:0005509, GO:0005515, GO:0005524, GO:0006468, GO:0030247	PF00069, PF07645, PF13947	IPR000152, IPR000719, IPR000742, IPR001881, IPR002290, IPR008271, IPR011009, IPR013320, IPR017441, IPR018097, IPR025287				down
HORVU5Hr1G070640	MLOC_63720	undescribed protein	none	none	none	up	up
HORVU5Hr1G070810	unknown	O-fucosyltransferase family protein	none	PF10250	IPR019378, IPR024709		down
HORVU5Hr1G070880	MLOC_3587	Prolyl oligopeptidase family protein	GO:0004252, GO:0006508, GO:0008236, GO:0070008	PF00326, PF02897	IPR001375, IPR002470, IPR023302, IPR029058		up
HORVU5Hr1G071080	MLOC_9885	Cellulose synthase-like protein E6	none	none	none				up
HORVU5Hr1G071140	MLOC_65914	cellulose synthase like E1	GO:0016020, GO:0016760, GO:0030244	PF03552	IPR005150, IPR029044	down	down	down
HORVU5Hr1G071270	MLOC_18557	F-box and associated interaction domains-containing protein	GO:0005515	PF00646	IPR001810, IPR017451	up	up
HORVU5Hr1G071280	MLOC_68838	RING/U-box superfamily protein	GO:0005515, GO:0008270	PF13639	IPR001841, IPR011016, IPR013083		up
HORVU5Hr1G071920	MLOC_74483	Photosystem I reaction center subunit V	GO:0009522, GO:0015979, GO:0016020, GO:0016168	PF01241	IPR000549, IPR016370, IPR017494, IPR023618	up	up
HORVU5Hr1G071940	MLOC_73638	UDP-Glycosyltransferase superfamily protein	GO:0008152, GO:0016758	PF00201	IPR002213			up	up
HORVU5Hr1G072160	MLOC_70601	Late embryogenesis abundant protein group 8 protein, putative	none	PF10714	IPR018930	up	up	up	up
HORVU5Hr1G072620	MLOC_6839	FASCICLIN-like arabinogalactan-protein 12	none	PF02469	IPR000782		down	down	down
HORVU5Hr1G072650	MLOC_40019	Calcium-binding EF-hand family protein	GO:0005509	PF13499	IPR002048, IPR011992, IPR018247	down	down
HORVU5Hr1G072980	MLOC_6783	serine carboxypeptidase-like 18	GO:0004185, GO:0006508	PF00450	IPR001563, IPR029058	up
HORVU5Hr1G073050	MLOC_81237	FKBP-like peptidyl-prolyl cis-trans isomerase family protein	GO:0006457	PF00254	IPR001179	up	up
HORVU5Hr1G073740	MLOC_62927	dihydroflavonol 4-reductase-like1	GO:0003824, GO:0050662	PF01370	IPR001509, IPR016040				down
HORVU5Hr1G074820	MLOC_64633	N-methyl-L-tryptophan oxidase	GO:0016491, GO:0055114	PF01266	IPR006076, IPR011032, IPR023753	down
HORVU5Hr1G074900	MLOC_77257	N-methyl-L-tryptophan oxidase	GO:0016491, GO:0055114	PF01266	IPR006076, IPR023753			down
HORVU5Hr1G075050	unknown	calcium-transporting ATPase, putative	GO:0000166, GO:0005388, GO:0005516, GO:0005524, GO:0016020, GO:0016021, GO:0046872, GO:0070588	PF00122, PF00689, PF00690, PF00702, PF12515	IPR001757, IPR004014, IPR006068, IPR006408, IPR008250, IPR018303, IPR023214, IPR023298, IPR023299, IPR024750				down
HORVU5Hr1G075430	MLOC_77859	Transcription factor bHLH49	GO:0046983	PF00010	IPR011598			down	down
HORVU5Hr1G075510	MLOC_14239	Glucan endo-1,3-beta-glucosidase 13	GO:0004553, GO:0005975	PF00332, PF07983	IPR000490, IPR012946, IPR013781, IPR017853			down	down
HORVU5Hr1G075550	MLOC_66526	Oxidoreductase, zinc-binding dehydrogenase family protein	none	PF13602	IPR011032, IPR016040			up
HORVU5Hr1G076100	MLOC_55270	ACT domain-containing protein	GO:0008152, GO:0016597	PF01842	IPR002912			down
HORVU5Hr1G076250	MLOC_12105	purple acid phosphatase 27	GO:0003993, GO:0016787, GO:0046872	PF00149, PF14008, PF16656	IPR004843, IPR008963, IPR015914, IPR025733, IPR029052				down
HORVU5Hr1G076510	MLOC_24900	L-ascorbate oxidase	GO:0005507, GO:0005576, GO:0016491, GO:0055114	PF00394, PF07731, PF07732	IPR001117, IPR002355, IPR008972, IPR011706, IPR011707, IPR017760	down	down
HORVU5Hr1G076780	MLOC_67204	Protein S-acyltransferase 8	GO:0008270	PF01529	IPR001594	down
HORVU5Hr1G077010	MLOC_55957	NAC domain containing protein 41	GO:0003677, GO:0006355	PF02365	IPR003441			down	down
HORVU5Hr1G077120	MLOC_54836	Esterase/lipase/thioesterase family protein	GO:0016747	PF03982, PF12146	IPR007130, IPR022742, IPR029058				up
HORVU5Hr1G077700	MLOC_71301	Protein kinase superfamily protein	GO:0004672, GO:0004842, GO:0005524, GO:0006468, GO:0016567	PF00069, PF04564	IPR000719, IPR002290, IPR003613, IPR008271, IPR011009, IPR013083, IPR013320			down
HORVU5Hr1G077880	MLOC_32633	Beta-glucosidase 31	GO:0004553, GO:0005975	PF00232	IPR001360, IPR013781, IPR017853	up	up	up	up
HORVU5Hr1G078060	MLOC_74277	mitogen-activated protein kinase 1	GO:0004672, GO:0005524, GO:0006468	PF00069	IPR000719, IPR002290, IPR011009	up	up	up
HORVU5Hr1G078100	MLOC_14667	Disease resistance protein	GO:0043531	PF00931	IPR002182, IPR027417, IPR032675			down
HORVU5Hr1G078130	MLOC_72420	lecithin:cholesterol acyltransferase 3	GO:0006629, GO:0008374	PF02450	IPR003386, IPR029058	up
HORVU5Hr1G078320	MLOC_62557	Solute carrier family 35 member F1	GO:0006810, GO:0016021	PF06027	IPR009262	down
HORVU5Hr1G078630	MLOC_73746	respiratory burst oxidase homologue D	GO:0004601, GO:0005509, GO:0016491, GO:0050664, GO:0055114	PF01794, PF08022, PF08414	IPR002048, IPR011992, IPR013112, IPR013130, IPR013623, IPR017927, IPR017938, IPR018247	down	down		up
HORVU5Hr1G079600	unknown	undescribed protein	none	none	none		up		up
HORVU5Hr1G079700	MLOC_61591	formin homology 1	none	PF02181	IPR015425	up
HORVU5Hr1G080090	MLOC_7629	serine carboxypeptidase-like 17	GO:0004185, GO:0006508	PF00450	IPR001563, IPR018202, IPR029058			up	up
HORVU5Hr1G080300	MLOC_54227	Dehydration-responsive element-binding protein 1B	GO:0003677, GO:0003700, GO:0006355	PF00847	IPR001471, IPR016177		down		down
HORVU5Hr1G081060	MLOC_64838	Cytochrome P450 superfamily protein	GO:0005506, GO:0016705, GO:0020037, GO:0055114	PF00067	IPR001128, IPR002401, IPR017972		down
HORVU5Hr1G081120	MLOC_54310	Mediator of RNA polymerase II transcription subunit 10	GO:0001104, GO:0006357, GO:0016592	PF09748	IPR019145				up
HORVU5Hr1G081500	MLOC_67884	Protein STAY-GREEN, chloroplastic	none	PF12638	IPR024438			up	up
HORVU5Hr1G081610	MLOC_2612	Late embryogenesis abundant (LEA) hydroxyproline-rich glycoprotein family	none	PF03168	IPR004864	down	down
HORVU5Hr1G081950	MLOC_14356	purple acid phosphatase 29	none	none	IPR029052	down	down	down	down
HORVU5Hr1G082480	MLOC_52513	Putative adipose-regulatory protein (Seipin)	GO:0019915	PF06775	IPR009617		up
HORVU5Hr1G082810	MLOC_79498	Cathepsin B-like cysteine proteinase	GO:0006508, GO:0008234	PF00112, PF08246	IPR000169, IPR000668, IPR013201, IPR025660, IPR025661			down
HORVU5Hr1G082940	MLOC_65020	exoribonuclease 2	GO:0003676, GO:0004527	PF03159	IPR004859		down
HORVU5Hr1G083100	MLOC_58046	1-phosphatidylinositol phosphodiesterase	GO:0006629, GO:0008081	PF00388	IPR000909, IPR017946	down	down
HORVU5Hr1G083240	MLOC_12349	Pathogenesis-related thaumatin superfamily protein	none	PF00314	IPR001938	down	down		down
HORVU5Hr1G084100	MLOC_32662	protein kinase family protein	GO:0004672, GO:0005524, GO:0006468	PF07714, PF12819	IPR000719, IPR001245, IPR002290, IPR008271, IPR011009, IPR013320, IPR017441, IPR024788		down		down
HORVU5Hr1G084560	MLOC_81614	Leucine-rich receptor-like protein kinase family protein	GO:0004672, GO:0005515, GO:0005524, GO:0006468	PF00069, PF13855	IPR000719, IPR001611, IPR003591, IPR008266, IPR011009, IPR013320, IPR017441, IPR032675	up	up
HORVU5Hr1G084820	MLOC_66718	HXXXD-type acyl-transferase family protein	GO:0016747	PF02458	IPR003480, IPR023213		down
HORVU5Hr1G084860	MLOC_40279	Cysteine-rich receptor-like protein kinase 10	none	PF01657	IPR002902		down		down
HORVU5Hr1G085220	MLOC_24388	ATP/DNA-binding protein	none	none	none				down
HORVU5Hr1G086320	unknown	SAUR-like auxin-responsive protein family	GO:0009733	PF02519	IPR003676				up
HORVU5Hr1G086660	MLOC_56946	Flavin-containing monooxygenase family protein	GO:0004499, GO:0016491, GO:0050660, GO:0050661, GO:0055114	PF00743	IPR012143, IPR020946, IPR023753	up	up	up	up
HORVU5Hr1G086670	MLOC_11896	Flavin-binding monooxygenase family protein	GO:0004499, GO:0016491, GO:0050660, GO:0050661, GO:0055114	PF00743	IPR020946, IPR023753			down
HORVU5Hr1G086710	MLOC_11897	Flavin-containing monooxygenase family protein	GO:0004499, GO:0016491, GO:0050660, GO:0050661, GO:0055114	PF00743	IPR020946, IPR023753	down	down
HORVU5Hr1G086970	MLOC_9982	unknown function	none	none	none			down
HORVU5Hr1G087420	unknown	Leucine-rich repeat receptor-like protein kinase family protein	GO:0005515	PF00560, PF13855	IPR001611, IPR003591, IPR032675			down
HORVU5Hr1G087730	MLOC_3881	13S globulin seed storage protein 2	GO:0045735	PF00190	IPR006045, IPR011051, IPR014710		up	up	up
HORVU5Hr1G088130	MLOC_61116	PHYTOENE SYNTHASE	GO:0009058, GO:0016740, GO:0016765	PF00494	IPR002060, IPR008949, IPR019845	up	up		up
HORVU5Hr1G088700	MLOC_3688	Protein phosphatase 2C family protein	GO:0003824, GO:0043169	PF00481	IPR000222, IPR001932	up
HORVU5Hr1G089230	MLOC_11135	Fatty acyl-CoA reductase 1	GO:0080019	PF03015, PF07993	IPR013120, IPR016040, IPR026055			up	up
HORVU5Hr1G089620	MLOC_63789	receptor kinase 2	GO:0004672, GO:0005524, GO:0006468	PF07714	IPR000719, IPR001245, IPR002290, IPR008271, IPR011009, IPR013320, IPR017441	down	down	down	down
HORVU5Hr1G089840	MLOC_12693	receptor kinase 3	GO:0004672, GO:0005509, GO:0005515, GO:0005524, GO:0006468	PF07714	IPR000152, IPR000719, IPR000742, IPR001245, IPR001881, IPR002290, IPR008271, IPR009030, IPR011009, IPR017441, IPR018097	down	down
HORVU5Hr1G091820	MLOC_71233	MATE efflux family protein	GO:0006855, GO:0015238, GO:0015297, GO:0016020, GO:0055085	PF01554	IPR002528			down	down
HORVU5Hr1G092100	unknown	Dehydrin	GO:0006950, GO:0009415	PF00257	IPR000167, IPR030513	up	up		up
HORVU5Hr1G092120	unknown	Dehydrin 7	GO:0006950, GO:0009415	PF00257	IPR000167, IPR030513	up	up	up	up
HORVU5Hr1G092850	MLOC_18300	nine-cis-epoxycarotenoid dioxygenase 9	none	PF03055	IPR004294	up	up	up	up
HORVU5Hr1G093260	MLOC_10666	Charged multivesicular body protein 2a	GO:0007034	PF03357	IPR005024			up
HORVU5Hr1G093350	MLOC_71738	Solute carrier family 22 member 1	GO:0005215, GO:0016021, GO:0022857, GO:0055085	PF00083	IPR005828, IPR005829, IPR020846	down
HORVU5Hr1G093390	MLOC_76072	Solute carrier family 22 member 1	GO:0016021, GO:0022857, GO:0055085	PF00083	IPR005828, IPR020846		up	up	up
HORVU5Hr1G093860	MLOC_56868	Structural constituent of ribosome protein	none	PF03350	IPR005134	down		down
HORVU5Hr1G093980	MLOC_55259	Vacuolar protein sorting-associated protein 18 homolog	GO:0005515, GO:0006886, GO:0008270, GO:0016192	PF00637, PF05131	IPR000547, IPR001841, IPR007810, IPR013083			down	down
HORVU5Hr1G094080	MLOC_47613	Cytochrome P450 superfamily protein	GO:0005506, GO:0016705, GO:0020037, GO:0055114	PF00067	IPR001128, IPR002401, IPR017972	up
HORVU5Hr1G094190	MLOC_61364	BTB/POZ domain-containing protein	GO:0005515	PF00651, PF00917	IPR000210, IPR002083, IPR008974, IPR011333		down	down
HORVU5Hr1G094680	unknown	Late embryogenesis abundant protein D-34	none	PF04927	IPR007011	up		up	up
HORVU5Hr1G094940	unknown	Dehydrogenase/reductase SDR family member 4	GO:0008152, GO:0016491	PF00106	IPR002198, IPR002347, IPR016040, IPR020904	down	down	down	down
HORVU5Hr1G095020	MLOC_9838	Protein NRT1/ PTR FAMILY 4.5	GO:0005215, GO:0006810, GO:0016020	PF00854	IPR000109, IPR020846		down	down
HORVU5Hr1G095120	MLOC_54815	Leucine-rich receptor-like protein kinase family protein	GO:0004672, GO:0005515, GO:0005524, GO:0006468	PF00069, PF00560, PF08263, PF13855	IPR000719, IPR001611, IPR002290, IPR003591, IPR008271, IPR011009, IPR013210, IPR013320, IPR017441, IPR032675		down		down
HORVU5Hr1G095310	MLOC_12353	unknown function	none	none	none			up	up
HORVU5Hr1G095540	MLOC_81045	Outward rectifying potassium channel protein	GO:0005267, GO:0005509, GO:0016020, GO:0071805	PF07885	IPR002048, IPR003280, IPR011992, IPR013099, IPR018247		down
HORVU5Hr1G095580	MLOC_18612	Cathepsin B-like cysteine proteinase	GO:0006508, GO:0008234	PF00112, PF08246	IPR000169, IPR000668, IPR013201, IPR025660, IPR025661	down	down
HORVU5Hr1G096000	MLOC_242	Lipid A export ATP-binding/permease protein MsbA	GO:0005524, GO:0006810, GO:0016021, GO:0016887, GO:0042626, GO:0055085	PF00005, PF00664	IPR003439, IPR003593, IPR011527, IPR017871, IPR027417				down
HORVU5Hr1G096950	MLOC_22824	Cytochrome P450 superfamily protein	GO:0005506, GO:0016705, GO:0020037, GO:0055114	PF00067	IPR001128, IPR002401	up
HORVU5Hr1G097010	MLOC_46186	Protein kinase superfamily protein	GO:0004672, GO:0005515, GO:0005524, GO:0006468	PF00564, PF07714	IPR000270, IPR000719, IPR001245, IPR002290, IPR008271, IPR011009	down
HORVU5Hr1G097060	MLOC_70024	Protein phosphatase 2C family protein	GO:0003824, GO:0043169	PF00481	IPR000222, IPR001932			up	up
HORVU5Hr1G097270	MLOC_71946	Peroxidase superfamily protein	GO:0004601, GO:0006979, GO:0020037, GO:0055114	PF00141	IPR000823, IPR002016, IPR010255, IPR019793	down	down
HORVU5Hr1G097310	MLOC_39473	Coffea canephora DH200=94 genomic scaffold, scaffold_6	none	none	none			up	up
HORVU5Hr1G097930	MLOC_67435	unknown function	none	none	none	up	up		down
HORVU5Hr1G097940	unknown	undescribed protein	none	none	none		down		down
HORVU5Hr1G098000	MLOC_75335	Thioredoxin superfamily protein	GO:0045454	PF00085	IPR012336, IPR013766	up	up
HORVU5Hr1G098030	unknown	undescribed protein	none	none	none			up
HORVU5Hr1G098190	MLOC_72642	Cold acclimation protein WCOR413 family	GO:0016021	PF05562	IPR008892	up	up	up
HORVU5Hr1G098410	MLOC_76567	E3 ubiquitin-protein ligase MARCH6	GO:0008270	PF12906	IPR011016, IPR013083	up
HORVU5Hr1G098570	unknown	Homeobox protein knotted-1-like 12	GO:0003677, GO:0005634, GO:0006355, GO:0043565	PF03789, PF03790, PF03791, PF05920	IPR001356, IPR005539, IPR005540, IPR005541, IPR008422, IPR009057, IPR017970		down
HORVU5Hr1G099160	MLOC_36533	NB-ARC domain containing protein	none	none	IPR027417	down	down
HORVU5Hr1G099670	unknown	Class E vacuolar protein-sorting machinery protein hse1	GO:0005622, GO:0006886	PF00790, PF03127	IPR002014, IPR004152, IPR008942, IPR018205	down		down	down
HORVU5Hr1G100140	MLOC_66074	Photosystem I reaction center subunit III	GO:0009522, GO:0009538, GO:0015979	PF02507	IPR003666	up	up
HORVU5Hr1G101680	MLOC_6875	Reticulon family protein	none	PF02453	IPR003388		down
HORVU5Hr1G102620	MLOC_18287	Amaranthin-like lectin	GO:0005576, GO:0009405	PF01117, PF07468	IPR005830, IPR008998, IPR023307			down
HORVU5Hr1G103400	MLOC_63989	TCP family transcription factor 4	none	PF03634	IPR005333, IPR017887			up
HORVU5Hr1G103430	MLOC_69873	Glutathione S-transferase family protein	GO:0005515	PF13410, PF13417	IPR004045, IPR010987, IPR012336	up	up
HORVU5Hr1G103440	MLOC_66112	zinc-finger protein 1	GO:0046872	none	IPR007087			down
HORVU5Hr1G104230	MLOC_63574	Glucan endo-1,3-beta-glucosidase 8	GO:0004553, GO:0005975	PF00332, PF07983	IPR000490, IPR012946, IPR013781, IPR017853				up
HORVU5Hr1G104800	MLOC_43648	Acyl-CoA N-acyltransferases (NAT) superfamily protein	GO:0008080	PF13302	IPR000182, IPR016181				down
HORVU5Hr1G104840	MLOC_38262	receptor kinase 2	GO:0004672, GO:0005524, GO:0006468, GO:0030246	PF00069, PF00139	IPR000719, IPR001220, IPR002290, IPR008271, IPR011009, IPR013320, IPR017441	down	down
HORVU5Hr1G105390	MLOC_31922	Chromosome 3B, genomic scaffold, cultivar Chinese Spring	none	PF07762	IPR011676			down	down
HORVU5Hr1G105840	MLOC_5540	Aluminium induced protein with YGL and LRDR motifs	none	PF12481	IPR024286, IPR029055	up	up	up	up
HORVU5Hr1G105930	MLOC_12837	CASP-like protein 1U3	none	PF04535	IPR006459, IPR006702	down	down
HORVU5Hr1G106010	MLOC_72965	Cysteine-rich secretory protein 3	GO:0005576	PF00188	IPR001283, IPR002413, IPR014044, IPR018244	down	down		down
HORVU5Hr1G106030	MLOC_81587	unknown function	none	none	none	down
HORVU5Hr1G106790	MLOC_67407	GTPase Obg	GO:0005525	PF01018, PF01926	IPR006073, IPR006074, IPR006169, IPR027417, IPR031167				up
HORVU5Hr1G106960	MLOC_28352	Major facilitator superfamily protein	none	PF06813	IPR010658, IPR020846		down
HORVU5Hr1G107000	MLOC_54525	OTU domain-containing protein	none	PF02338	IPR003323				up
HORVU5Hr1G109260	MLOC_945	Chlorophyll a-b binding protein, chloroplastic	none	PF00504	IPR022796, IPR023329	up
HORVU5Hr1G109390	MLOC_17583	Acetyl-coenzyme A synthetase	GO:0003824, GO:0008152	PF00501	IPR000873, IPR020845	down
HORVU5Hr1G109520	MLOC_54625	5'-adenylylsulfate reductase-like 5	GO:0045454	PF00085	IPR012336, IPR013766			up
HORVU5Hr1G109940	unknown	Chaperonin-like RbcX protein	none	PF02341	IPR003435	up
HORVU5Hr1G110960	MLOC_70032	Transcription initiation factor IIE subunit beta	GO:0005673, GO:0006367	PF02186	IPR003166, IPR016656	up
HORVU5Hr1G111330	MLOC_56337	unknown function	none	none	none	down	down
HORVU5Hr1G111480	unknown	DNA gyrase subunit A	GO:0003677, GO:0003916, GO:0003918, GO:0005524, GO:0005694, GO:0006259, GO:0006265	PF00521, PF03989	IPR002205, IPR005743, IPR006691, IPR013758, IPR013760, IPR024946				up
HORVU5Hr1G111590	MLOC_37104	NAC domain protein,	GO:0003677, GO:0006355	PF02365	IPR003441	up	up
HORVU5Hr1G112160	MLOC_17514	Pathogenesis-related thaumatin superfamily protein	none	PF00314	IPR001938, IPR017949			up
HORVU5Hr1G112350	MLOC_37861	Multiple inositol polyphosphate phosphatase 1	GO:0003993	PF00328	IPR000560, IPR029033	up	up
HORVU5Hr1G112680	MLOC_34058	unknown function	none	PF14309	IPR025486	down
HORVU5Hr1G114540	MLOC_24964	Pectin acetylesterase 3	GO:0016787	PF03283	IPR004963				down
HORVU5Hr1G114700	MLOC_68219	UDP-Glycosyltransferase superfamily protein	GO:0008152, GO:0016758	PF00201	IPR002213				down
HORVU5Hr1G114900	MLOC_55008	Cycloeucalenol cycloisomerase	none	none	IPR020532		down		down
HORVU5Hr1G115070	MLOC_15378	unknown protein				up
HORVU5Hr1G115100	MLOC_67899	GRAM domain-containing protein / ABA-responsive protein-related	none	PF02893	IPR004182	up	up	up	up
HORVU5Hr1G115250	MLOC_15595	unknown function	none	none	none		down	down	down
HORVU5Hr1G115340	MLOC_68859	50S ribosomal protein L18	GO:0003735, GO:0005622, GO:0005840, GO:0006412	PF00861	IPR004389, IPR005484				up
HORVU5Hr1G115870	MLOC_4484	PLANT CADMIUM RESISTANCE 2	none	PF04749	IPR006461		down	down	down
HORVU5Hr1G115880	MLOC_13874	PLANT CADMIUM RESISTANCE 2	none	PF04749	IPR006461	down	down
HORVU5Hr1G116980	MLOC_58520	Cytochrome P450 superfamily protein	GO:0005506, GO:0016705, GO:0020037, GO:0055114	PF00067	IPR001128, IPR002401, IPR017972	down	down	down
HORVU5Hr1G117470	MLOC_13213	Pectin lyase-like superfamily protein	GO:0004650, GO:0005975	PF00295	IPR000743, IPR006626, IPR011050, IPR012334	down
HORVU5Hr1G117610	MLOC_71127	Domain of unknown function (DUF2431)	none	PF10354	IPR019446, IPR029063		down
HORVU5Hr1G117680	unknown	Cytidine/deoxycytidylate deaminase family protein	GO:0003824, GO:0008270, GO:0016787	PF00383	IPR002125, IPR016192, IPR016193				up
HORVU5Hr1G117790	MLOC_62583	unknown function	none	PF04578, PF13968	IPR007658, IPR025315	down	down
HORVU5Hr1G118200	MLOC_64369	Leucine-rich repeat receptor-like protein kinase family protein	GO:0005515	PF08263, PF13855	IPR001611, IPR011049, IPR013210, IPR032675	down	down
HORVU5Hr1G118590	MLOC_35002	ammonium transporter 2	GO:0008519, GO:0015696, GO:0016020, GO:0072488	PF00909	IPR001905, IPR002229, IPR024041, IPR029020			down	down
HORVU5Hr1G119000	MLOC_14275	Protein kinase family protein	GO:0004672, GO:0005509, GO:0005515, GO:0005524, GO:0006468, GO:0030247	PF07714, PF13947	IPR000719, IPR000742, IPR001245, IPR001881, IPR002290, IPR008271, IPR011009, IPR013320, IPR017441, IPR018097, IPR025287	down	down
HORVU5Hr1G119040	MLOC_22101	Chromosome 3B, genomic scaffold, cultivar Chinese Spring	GO:0005515	PF00646	IPR001810, IPR032675	down
HORVU5Hr1G119480	MLOC_68803	Leucine-rich repeat receptor-like protein kinase family protein	none	PF08263	IPR011049, IPR013210, IPR032675	down	down		down
HORVU5Hr1G120630	MLOC_10610	Coffea canephora DH200=94 genomic scaffold, scaffold_84	none	PF14009	IPR025322	up
HORVU5Hr1G121440	MLOC_55556	receptor kinase 2	GO:0004672, GO:0005524, GO:0006468	PF00069, PF07714	IPR000719, IPR001245, IPR002290, IPR008271, IPR011009, IPR017441	up	up		up
HORVU5Hr1G122510	unknown	Leucine-rich receptor-like protein kinase family protein	GO:0004672, GO:0005515, GO:0005524, GO:0006468	PF00069, PF00560, PF13855	IPR000719, IPR001611, IPR002290, IPR003591, IPR008271, IPR011009, IPR013320, IPR017441, IPR032675	down	down
HORVU5Hr1G122520	unknown	undescribed protein	none	none	none	down	down		down
HORVU5Hr1G122680	MLOC_26026	FRIGIDA	none	PF07899	IPR012474	up		up	up
HORVU5Hr1G122820	MLOC_51713	Ankyrin repeat domain-containing protein 2A	GO:0005515	PF12796	IPR002110, IPR020683	up	up
HORVU5Hr1G122950	MLOC_19324	Leucine-rich receptor-like protein kinase family protein	GO:0004672, GO:0005515, GO:0005524, GO:0006468	PF00069, PF08263, PF13855	IPR000719, IPR001611, IPR002290, IPR003591, IPR008271, IPR011009, IPR013210, IPR013320, IPR017441, IPR032675	down
HORVU5Hr1G123200	MLOC_44708	unknown function	none	none	none		up	up	up
HORVU5Hr1G123540	MLOC_19954	receptor kinase 1	GO:0004672, GO:0005524, GO:0006468	PF01657, PF07714	IPR000719, IPR001245, IPR002290, IPR002902, IPR008271, IPR011009, IPR013320, IPR017441	down	down		down
HORVU5Hr1G123550	MLOC_55207	receptor kinase 2	GO:0004672, GO:0005524, GO:0006468	PF07714	IPR000719, IPR001245, IPR002290, IPR008271, IPR011009	down	down		down
HORVU5Hr1G123970	MLOC_59070	Beta-fructofuranosidase, insoluble isoenzyme 4	GO:0004553, GO:0005975	PF00251, PF08244	IPR001362, IPR013148, IPR013189, IPR013320, IPR023296		down
HORVU5Hr1G124160	MLOC_67012	Chlorophyll a-b binding protein 2, chloroplastic	none	PF00504	IPR022796, IPR023329			down	down
HORVU5Hr1G124210	MLOC_7826	PGR5-LIKE A	none	none	none	up	up
HORVU5Hr1G124650	MLOC_22875	ABC transporter G family member 48	GO:0005524, GO:0016020, GO:0016887	PF00005, PF01061, PF08370	IPR003439, IPR003593, IPR013525, IPR013581, IPR027417				down
HORVU5Hr1G125450	MLOC_66583	AWPM-19-like family protein	none	PF05512	IPR008390	up	up	up	up
HORVU5Hr1G125460	MLOC_66583	AWPM-19-like family protein	none	PF05512	IPR008390	up	up	up	up
HORVU5Hr1G125500	MLOC_66583	AWPM-19-like family protein	none	PF05512	IPR008390	up	up	up	up
HORVU5Hr1G125810	MLOC_32569	Kiwellin	none	none	IPR009009	down	down	down	down
HORVU6Hr1G000340	unknown	ORF I	none	none	none	up	up		up
HORVU6Hr1G000500	MLOC_75424	nodulin MtN21 /EamA-like transporter family protein	GO:0016020, GO:0016021	PF00892	IPR000620		down
HORVU6Hr1G001160	unknown	receptor-like protein kinase 4	GO:0004672, GO:0005524, GO:0006468	PF00069, PF01476	IPR000719, IPR002290, IPR008271, IPR011009, IPR013320, IPR017441, IPR018392	down	down	down	down
HORVU6Hr1G002290	MLOC_14052	receptor-like protein kinase 2	GO:0004672, GO:0005515, GO:0005524, GO:0006468	PF07714, PF08263, PF13855	IPR000719, IPR001245, IPR001611, IPR002290, IPR003591, IPR008271, IPR011009, IPR013210, IPR013320, IPR017441, IPR032675				down
HORVU6Hr1G002390	MLOC_65242	4,5-DOPA dioxygenase extradiol	GO:0006725, GO:0008198, GO:0016491	PF02900	IPR004183		down	down
HORVU6Hr1G002400	MLOC_15252	Cytochrome P450 superfamily protein	GO:0005506, GO:0016705, GO:0020037, GO:0055114	PF00067	IPR001128, IPR002401, IPR017972	down	down
HORVU6Hr1G003160	MLOC_51326	O-methyltransferase family protein	GO:0008168, GO:0008171, GO:0046983	PF00891, PF08100	IPR001077, IPR011991, IPR012967, IPR016461, IPR029063		down
HORVU6Hr1G003300	MLOC_60358	nitrate reductase 1	GO:0006809, GO:0016491, GO:0020037, GO:0030151, GO:0042128, GO:0043546, GO:0050464, GO:0055114	PF00173, PF00174, PF00175, PF00970, PF03404	IPR000572, IPR001199, IPR001433, IPR001709, IPR001834, IPR005066, IPR008333, IPR008335, IPR012137, IPR014756, IPR017927, IPR017938, IPR018506, IPR022407	down
HORVU6Hr1G004000	MLOC_60412	Acid beta-fructofuranosidase	GO:0004553, GO:0005975	PF00251	IPR001362, IPR013148, IPR023296		down	up	up
HORVU6Hr1G004010	MLOC_19784	Acid beta-fructofuranosidase	GO:0004553, GO:0004564, GO:0004575, GO:0005975	PF00251, PF08244, PF11837	IPR001362, IPR013148, IPR013189, IPR013320, IPR018053, IPR021792, IPR023296	down	down	up	up
HORVU6Hr1G004040	MLOC_19784	unknown function	none	none	IPR032675		down
HORVU6Hr1G004320	MLOC_46083	Protein kinase domain containing protein, expressed	GO:0030247	PF13947	IPR025287		down	down	down
HORVU6Hr1G004340	MLOC_46369	receptor-like protein kinase 2	GO:0004672, GO:0005524, GO:0006468	PF00069	IPR000719, IPR002290, IPR008271, IPR011009, IPR017441		down	down	down
HORVU6Hr1G004560	MLOC_9378	Protein kinase domain containing protein, expressed	GO:0030247	PF13947	IPR025287			down	down
HORVU6Hr1G004980	unknown	unknown function	none	none	none	up	up	down	down
HORVU6Hr1G005350	MLOC_73392	GPI mannosyltransferase 3	GO:0016757	PF03901	IPR005599	down	down		down
HORVU6Hr1G005360	unknown	wall-associated kinase 2	GO:0005509, GO:0005515, GO:0030247	PF13947	IPR000742, IPR001881, IPR018097, IPR025287	up	down	down
HORVU6Hr1G005930	unknown	high affinity nitrate transporter 2.6	GO:0016021, GO:0055085	PF07690	IPR011701, IPR020846	up	up
HORVU6Hr1G006080	MLOC_7342	histone H2A 7	GO:0000786, GO:0003677, GO:0005634, GO:0046982	PF00125, PF16211	IPR002119, IPR007125, IPR009072, IPR032454, IPR032458			up	up
HORVU6Hr1G006840	MLOC_72319	unknown function	none	none	none		down
HORVU6Hr1G006880	MLOC_77869	Carboxypeptidase Y homolog A	GO:0004185, GO:0006508	PF00450	IPR001563, IPR018202, IPR029058	down
HORVU6Hr1G008640	MLOC_11835	catalase 1	GO:0004096, GO:0006979, GO:0020037, GO:0055114	PF00199, PF06628	IPR002226, IPR010582, IPR011614, IPR018028, IPR020835				down
HORVU6Hr1G008720	MLOC_74627	Cathepsin B-like cysteine proteinase 5	GO:0006508, GO:0008234	PF00112, PF08246	IPR000668, IPR013201, IPR025660, IPR025661		down	down	down
HORVU6Hr1G008780	MLOC_74627	Cathepsin B-like cysteine proteinase 5	GO:0006508, GO:0008234	PF00112, PF08246	IPR000668, IPR013201, IPR025660, IPR025661		down	down	down
HORVU6Hr1G009170	MLOC_73381	NAD(P)-binding Rossmann-fold superfamily protein	none	none	IPR016040		down
HORVU6Hr1G009670	MLOC_65774	signal peptide peptidase	GO:0004190, GO:0016021	PF04258	IPR006639, IPR007369			down
HORVU6Hr1G010200	MLOC_16020	receptor-like protein kinase 4	GO:0004672, GO:0005524, GO:0006468, GO:0030246	PF00069, PF00139	IPR000719, IPR001220, IPR002290, IPR008271, IPR011009, IPR013320, IPR017441	down	down		down
HORVU6Hr1G010230	MLOC_766	Disease resistance protein RGA2	GO:0043531	PF00931	IPR002182, IPR027417		down
HORVU6Hr1G010400	MLOC_26026	undescribed protein	none	none	none			up
HORVU6Hr1G010960	MLOC_15680	AT1G76250-like protein	none	none	none		up		up
HORVU6Hr1G011030	unknown	Histone superfamily protein	GO:0000786, GO:0003677, GO:0005634, GO:0006334, GO:0046982	none	IPR001951, IPR009072, IPR019809		down	down
HORVU6Hr1G011970	MLOC_19231	Calcium-binding EF-hand family protein	GO:0005509	PF13833	IPR002048, IPR011992, IPR018247			down
HORVU6Hr1G012170	MLOC_18811	terpene synthase 14	GO:0000287, GO:0008152, GO:0010333, GO:0016829	PF01397, PF03936	IPR001906, IPR005630, IPR008930, IPR008949			down
HORVU6Hr1G012570	MLOC_4890	Peptidyl-prolyl cis-trans isomerase	GO:0000413, GO:0003755, GO:0006457	PF00160	IPR002130, IPR020892, IPR024936, IPR029000	up		up
HORVU6Hr1G014450	MLOC_66886	BAX inhibitor 1	none	PF01027	IPR006214			down
HORVU6Hr1G015390	MLOC_68357	Pectin lyase-like superfamily protein	GO:0004650, GO:0005975	PF00295	IPR000743, IPR011050, IPR012334	down	down	up
HORVU6Hr1G015770	unknown	Photosystem II 5 kD protein	none	none	none		up
HORVU6Hr1G016750	MLOC_11262	Endoglucanase 11	none	none	none			down
HORVU6Hr1G016850	MLOC_72290	Chlorophyll a-b binding protein, chloroplastic	none	PF00504	IPR022796, IPR023329			up	up
HORVU6Hr1G017390	MLOC_13704	4-phosphopantetheine adenylyltransferase	GO:0003824, GO:0009058	PF01467	IPR004821, IPR014729	down
HORVU6Hr1G017860	MLOC_11629	L-aspartate oxidase	GO:0016491, GO:0055114	PF00890	IPR003953, IPR023753			down
HORVU6Hr1G017900	MLOC_62072	Synaptotagmin-5	GO:0005515, GO:0008289	PF00168, PF17047	IPR000008, IPR031468	up	up
HORVU6Hr1G019300	MLOC_49894	Delta-aminolevulinic acid dehydratase	GO:0003824, GO:0004655, GO:0033014, GO:0046872	PF00490	IPR001731, IPR013785, IPR030656				up
HORVU6Hr1G019760	unknown	Terpene cyclase/mutase family member	none	none	none				down
HORVU6Hr1G019870	MLOC_16344	F-box-like	none	PF14476	IPR027949			down
HORVU6Hr1G020080	MLOC_256	unknown protein				up	up
HORVU6Hr1G020570	unknown	ATP-dependent RNA helicase DeaD	GO:0003676, GO:0005524	PF00270, PF00271	IPR000629, IPR001650, IPR011545, IPR014001, IPR014014, IPR027417				down
HORVU6Hr1G020720	MLOC_66555	purple acid phosphatase 18	GO:0003993, GO:0016787, GO:0046872	PF00149, PF16656	IPR004843, IPR008963, IPR015914, IPR029052	down
HORVU6Hr1G021090	MLOC_29015	Chromosome 3B, genomic scaffold, cultivar Chinese Spring	none	PF03168	IPR004864	down	down		down
HORVU6Hr1G023090	MLOC_20165	receptor-like protein kinase 2	GO:0004672, GO:0005515, GO:0005524, GO:0006468	PF00069, PF08263, PF13855	IPR000719, IPR001611, IPR002290, IPR003591, IPR008271, IPR011009, IPR013210, IPR013320, IPR017441, IPR032675	down	down		down
HORVU6Hr1G023210	MLOC_20165	Leucine-rich repeat receptor-like protein kinase family protein	GO:0005515	PF00560, PF08263	IPR001611, IPR013210, IPR032675	down	down
HORVU6Hr1G023530	MLOC_46369	Protein kinase domain containing protein, expressed	none	none	none				down
HORVU6Hr1G025430	MLOC_50941	SNF1-related protein kinase regulatory subunit gamma-like PV42a	none	PF00571	IPR000644	up	up		up
HORVU6Hr1G025730	MLOC_67371	Quinone oxidoreductase-like protein 2 homolog	GO:0008270, GO:0016491, GO:0042558, GO:0055114	PF08240, PF13602	IPR000489, IPR002364, IPR011032, IPR013154, IPR016040, IPR020843		up
HORVU6Hr1G025840	unknown	undescribed protein	none	none	none	up
HORVU6Hr1G026600	MLOC_78725	Peroxidase superfamily protein	GO:0004601, GO:0006979, GO:0020037, GO:0055114	PF00141	IPR000823, IPR002016, IPR010255, IPR019793, IPR019794		down
HORVU6Hr1G027620	MLOC_37707	tubulin beta chain 2	GO:0003924, GO:0005200, GO:0005525, GO:0005874, GO:0007017	PF03953	IPR002453, IPR003008, IPR008280, IPR018316, IPR023123	down
HORVU6Hr1G027650	MLOC_55337	4-hydroxyphenylpyruvate dioxygenase	GO:0003868, GO:0009072, GO:0016701, GO:0055114	PF00903	IPR004360, IPR005956, IPR029068		up
HORVU6Hr1G028690	MLOC_36465	Chaperone protein ClpB 2	GO:0005524, GO:0005737, GO:0009408, GO:0016485, GO:0019538	PF00004, PF02861, PF07724, PF10431	IPR001270, IPR003593, IPR003959, IPR004176, IPR017730, IPR018368, IPR019489, IPR027417, IPR028299				up
HORVU6Hr1G029540	MLOC_12439	Uncharacterised conserved protein UCP015417, vWA	none	PF11443	IPR002035, IPR024553			up
HORVU6Hr1G029810	MLOC_64491	Fatty acid hydroxylase superfamily	GO:0005506, GO:0006633, GO:0016491, GO:0055114	PF04116, PF12076	IPR006694, IPR016040, IPR021940	up	up
HORVU6Hr1G031360	MLOC_68594	high-affinity K+ transporter 1	GO:0006812, GO:0008324, GO:0055085	PF02386	IPR003445			down
HORVU6Hr1G031480	MLOC_62667	Aldehyde dehydrogenase family 2 member C4	GO:0008152, GO:0016491, GO:0016620, GO:0055114	PF00171	IPR015590, IPR016160, IPR016161, IPR016162, IPR016163, IPR029510	up	up
HORVU6Hr1G031960	MLOC_4755	Copper-transporting ATPase 2	GO:0000166, GO:0005507, GO:0030001, GO:0046872	PF00122, PF00403	IPR006121, IPR006122, IPR008250, IPR017969				down
HORVU6Hr1G032540	MLOC_74702	Protein kinase superfamily protein	GO:0004672, GO:0005524, GO:0006468	PF07714	IPR000719, IPR001245, IPR008271, IPR011009, IPR017441			down
HORVU6Hr1G032640	MLOC_43983	F-box and associated interaction domains-containing protein	GO:0005515	PF00646	IPR001810, IPR017451			down
HORVU6Hr1G032960	MLOC_3858	Calcium-binding protein 4	GO:0005509	PF13202, PF13499	IPR002048, IPR011992, IPR018247	up
HORVU6Hr1G033310	MLOC_55674	BEST Arabidopsis thaliana protein match is: TPX2 (targeting protein for Xklp2) protein family .	none	none	none			down
HORVU6Hr1G033350	MLOC_60889	fumarylacetoacetase, putative	GO:0003824, GO:0004334, GO:0008152, GO:0009072	PF01557, PF09298	IPR005959, IPR011234, IPR015377				down
HORVU6Hr1G034040	unknown	Multiple organellar RNA editing factor 5, mitochondrial	none	none	none	up
HORVU6Hr1G034680	MLOC_6946	methyl-CPG-binding domain 9	GO:0005515, GO:0005634, GO:0008270	PF00439, PF00628, PF15612	IPR001487, IPR001965, IPR003888, IPR003889, IPR011011, IPR013083, IPR018501, IPR019786, IPR019787, IPR028942	up
HORVU6Hr1G034990	MLOC_4029	receptor kinase 2	GO:0004672, GO:0005515, GO:0005524, GO:0006468	PF07714, PF08263, PF13855	IPR000719, IPR001245, IPR001611, IPR003591, IPR011009, IPR013210, IPR032675			up	up
HORVU6Hr1G035160	MLOC_9842	Branched-chain-amino-acid aminotransferase	GO:0003824, GO:0008152	PF01063	IPR001544			down
HORVU6Hr1G036510	MLOC_43913	Carboxypeptidase Y homolog A	GO:0004185, GO:0006508	PF00450	IPR001563, IPR018202, IPR029058	down			down
HORVU6Hr1G036840	unknown	Argonaute family protein	GO:0003676, GO:0005515	PF02170, PF02171, PF08699, PF16486, PF16487, PF16488	IPR003100, IPR003165, IPR012337, IPR014811, IPR032472, IPR032473, IPR032474			down
HORVU6Hr1G038620	MLOC_6858	Ribonuclease Z	none	PF12706	IPR001279			up	up
HORVU6Hr1G039660	MLOC_18050	CASP-like protein 6	none	PF04535	IPR006459, IPR006702	up	up
HORVU6Hr1G041920	MLOC_37956	Metallopeptidase M24 family protein isoform 1	none	none	none	up		up
HORVU6Hr1G049050	unknown	Protein kinase superfamily protein	none	PF03109	IPR004147, IPR011009	up	up
HORVU6Hr1G050340	unknown	Histone-lysine N-methyltransferase	none	none	none	up
HORVU6Hr1G052360	MLOC_60867	fimbrin-like protein 2	GO:0005515	none	IPR001715	up	up
HORVU6Hr1G053000	MLOC_21885	Protein of unknown function (DUF581)	none	PF04570	IPR007650	up	up
HORVU6Hr1G053090	MLOC_7248	receptor lectin kinase	GO:0004672, GO:0005524, GO:0006468, GO:0030246	PF00069, PF00139	IPR000719, IPR001220, IPR002290, IPR008271, IPR011009, IPR013320, IPR017441	up		up
HORVU6Hr1G054890	MLOC_20608	undescribed protein	GO:0009790	PF03760	IPR005513	up	up	up	up
HORVU6Hr1G054910	MLOC_12058	Transcription factor bHLH128	GO:0046983	PF00010	IPR011598	down	down
HORVU6Hr1G056570	MLOC_29841	temperature-induced lipocalin	none	PF08212	IPR000566, IPR011038, IPR012674, IPR022271, IPR022272	up	up	up
HORVU6Hr1G057380	MLOC_32179	receptor-like protein kinase 2	GO:0004672, GO:0005524, GO:0006468	PF00069	IPR000719, IPR002290, IPR008271, IPR011009				down
HORVU6Hr1G057490	MLOC_59726	Leucine-rich repeat receptor-like protein kinase family protein	none	none	IPR032675		down
HORVU6Hr1G057770	MLOC_62963	Protein ROOT HAIR DEFECTIVE 3 homolog 2	none	PF05879	IPR008803	up	up
HORVU6Hr1G058450	MLOC_68712	RNA-binding protein 42	GO:0000166, GO:0003676	PF00076	IPR000504, IPR012677				up
HORVU6Hr1G058740	MLOC_8289	cryptochrome 2	GO:0009785, GO:0009882	PF00875, PF03441	IPR002081, IPR005101, IPR006050, IPR014134, IPR014729, IPR018394		up
HORVU6Hr1G058840	MLOC_4684	phenylalanine ammonia-lyase 2	GO:0003824, GO:0005737, GO:0006559, GO:0016841	PF00221	IPR001106, IPR005922, IPR008948, IPR022313, IPR023144, IPR024083	down		up	up
HORVU6Hr1G058880	MLOC_63546	cyclic nucleotide-gated channel 15	GO:0005216, GO:0006811, GO:0016020, GO:0055085	PF00520	IPR005821	down
HORVU6Hr1G058930	MLOC_13871	Aquaporin PIP2-4	GO:0005215, GO:0006810, GO:0016020	PF00230	IPR000425, IPR023271	down
HORVU6Hr1G058960	MLOC_63542	receptor-like protein kinase 2	GO:0004672, GO:0005515, GO:0005524, GO:0006468	PF00069, PF08263, PF13855	IPR000719, IPR001611, IPR002290, IPR003591, IPR008271, IPR011009, IPR013210, IPR013320, IPR017441, IPR032675		down		down
HORVU6Hr1G059550	MLOC_65439	Carboxypeptidase Y homolog A	GO:0004185, GO:0006508	PF00450	IPR001563, IPR018202, IPR029058	down			down
HORVU6Hr1G059850	MLOC_63849	3'(2'),5'-bisphosphate nucleotidase 2	GO:0046854	PF00459	IPR000760, IPR020583			down
HORVU6Hr1G059940	MLOC_11331	GRAM domain-containing protein / ABA-responsive protein-related	none	PF02893	IPR004182	down		down	down
HORVU6Hr1G060700	MLOC_5316	Remorin family protein	none	PF03763, PF03766	IPR005516, IPR005518	down
HORVU6Hr1G061270	MLOC_61036	Aldehyde dehydrogenase family 3 member F1	GO:0004030, GO:0006081, GO:0008152, GO:0016491, GO:0016620, GO:0055114	PF00171	IPR012394, IPR015590, IPR016161, IPR016162, IPR016163		down
HORVU6Hr1G061450	MLOC_60633	YELLOW STRIPE like 3	GO:0055085	PF03169	IPR004813	down
HORVU6Hr1G061580	unknown	T-complex protein 1 subunit epsilon	none	none	none			up
HORVU6Hr1G062220	MLOC_80586	Phospholipase A1-II 4	GO:0006629	PF01764	IPR002921, IPR029058		down
HORVU6Hr1G062350	MLOC_31638	Protein of unknown function (DUF630 and DUF632)	none	PF04782, PF04783	IPR006867, IPR006868	up
HORVU6Hr1G062870	unknown	anaphase-promoting complex subunit 8	GO:0005515, GO:0005680, GO:0030071	PF00515, PF04049, PF13176, PF13181, PF13414	IPR001440, IPR007192, IPR011990, IPR013026, IPR019734	down	down
HORVU6Hr1G063480	unknown	cysteine synthase D1	none	PF00291	IPR001926			up	up
HORVU6Hr1G063510	MLOC_80212	unknown function	none	none	none	up	up
HORVU6Hr1G063830	MLOC_73559	glutathione peroxidase 6	GO:0004602, GO:0006979, GO:0055114	PF00255	IPR000889, IPR012336, IPR029759			up
HORVU6Hr1G063950	unknown	Histone-lysine N-methyltransferase	none	none	none			up	up
HORVU6Hr1G064500	MLOC_44690	Ganglioside-induced differentiation-associated protein 2	none	PF13716	IPR001251	down	down
HORVU6Hr1G064620	MLOC_14884	Dehydrin COR410	GO:0006950, GO:0009415	PF00257	IPR000167, IPR030513	up	up	up
HORVU6Hr1G065210	MLOC_6447	transcription factor-related	GO:0046983	PF14215	IPR011598, IPR025610			down	down
HORVU6Hr1G065360	MLOC_65736	S-adenosyl-L-methionine-dependent methyltransferases superfamily protein	GO:0008168	PF03141	IPR004159, IPR029063			down	down
HORVU6Hr1G065710	MLOC_63586	SPX domain-containing membrane protein	GO:0016021, GO:0055085	PF03105, PF07690	IPR004331, IPR011701, IPR020846	up	up		up
HORVU6Hr1G066000	MLOC_68189	myb-like transcription factor family protein	GO:0003677	PF00249	IPR001005, IPR006447, IPR009057, IPR017930		down	down
HORVU6Hr1G066330	MLOC_34493	Alpha-amylase/trypsin inhibitor	GO:0004867	PF00234	IPR006105, IPR006106, IPR006311, IPR013771, IPR016140			up
HORVU6Hr1G067060	MLOC_63157	PLATZ transcription factor family protein	none	PF04640	IPR006734			up	up
HORVU6Hr1G067430	MLOC_51613	oligopeptide transporter 4	GO:0055085	PF03169	IPR004648, IPR004813		down
HORVU6Hr1G067470	MLOC_51654	xyloglucan endotransglucosylase/hydrolase 28	GO:0004553, GO:0005975	PF00722	IPR000757, IPR013320		down
HORVU6Hr1G067880	MLOC_7930	unknown protein							down
HORVU6Hr1G068100	MLOC_14844	myb-like transcription factor family protein	GO:0003677	PF00249, PF14379	IPR001005, IPR006447, IPR009057, IPR017930, IPR025756	up	up
HORVU6Hr1G068490	MLOC_55726	PENTATRICOPEPTIDE REPEAT 596	GO:0004519, GO:0005515	PF01535, PF03161, PF13812	IPR002885, IPR004860, IPR011990, IPR027434				up
HORVU6Hr1G068610	MLOC_31124	UDP-Glycosyltransferase superfamily protein	GO:0008152, GO:0016758	PF00201	IPR002213	down	down
HORVU6Hr1G068690	MLOC_4786	Cytochrome P450 superfamily protein	GO:0005506, GO:0016705, GO:0020037, GO:0055114	PF00067	IPR001128, IPR002401, IPR017972		up
HORVU6Hr1G068720	MLOC_61512	carotenoid cleavage dioxygenase 1	none	PF03055	IPR004294		down
HORVU6Hr1G069120	unknown	undescribed protein	none	none	none			down
HORVU6Hr1G069310	MLOC_80555	Kinesin light chain 4	GO:0005515	PF13176, PF13181, PF13424	IPR011990, IPR013026, IPR019734	down
HORVU6Hr1G069390	MLOC_38042	histidinol phosphate aminotransferase 1	GO:0000105, GO:0003824, GO:0004400, GO:0009058, GO:0030170	PF00155	IPR004839, IPR005861, IPR015421, IPR015422, IPR015424	down
HORVU6Hr1G069750	MLOC_3285	unknown protein						down
HORVU6Hr1G070290	MLOC_74990	unknown function	none	none	none				up
HORVU6Hr1G070450	MLOC_57296	Protein NRT1/ PTR FAMILY 7.3	GO:0005215, GO:0006810, GO:0016020	PF00854	IPR000109, IPR020846	up	up
HORVU6Hr1G070610	MLOC_58678	BnaCnng49070D protein	none	none	none		up
HORVU6Hr1G071190	MLOC_62394	Eukaryotic aspartyl protease family protein	none	PF14541, PF14543	IPR021109, IPR032799, IPR032861	down
HORVU6Hr1G071520	MLOC_48451	Eukaryotic aspartyl protease family protein	GO:0004190, GO:0006508	PF14541, PF14543	IPR001461, IPR001969, IPR021109, IPR032799, IPR032861				up
HORVU6Hr1G071660	unknown	ubiquitin-conjugating enzyme 11	none	PF00179	IPR000608, IPR016135			down	down
HORVU6Hr1G071950	MLOC_50966	Zinc finger protein CONSTANS-LIKE 10	GO:0005515, GO:0005622, GO:0008270	PF00643, PF06203	IPR000315, IPR010402		down
HORVU6Hr1G072630	MLOC_75496	LAG1 longevity assurance homolog 3	GO:0016021	PF03798	IPR006634		down	down
HORVU6Hr1G073630	unknown	unknown function	none	none	none	up	up		up
HORVU6Hr1G074030	MLOC_11890	glutamine synthetase 1					down
HORVU6Hr1G074200	MLOC_62551	Dihydroorotate dehydrogenase (quinone)	GO:0003824, GO:0005737, GO:0016627, GO:0055114	PF01180	IPR005720, IPR013785	up
HORVU6Hr1G074210	MLOC_75294	MACPF domain-containing protein	none	PF01823	IPR020864			up
HORVU6Hr1G074440	MLOC_51591	annexin 7	GO:0005509, GO:0005544	PF00191	IPR001464, IPR009118, IPR018252, IPR018502		up
HORVU6Hr1G074940	MLOC_5163	Lipase/lipooxygenase, PLAT/LH2 family protein	GO:0005515	PF01477	IPR001024			up	up
HORVU6Hr1G075010	MLOC_62475	beta-D-xylosidase 4	GO:0004553, GO:0005975	PF00933, PF01915, PF14310	IPR001764, IPR002772, IPR017853, IPR026891	down	down
HORVU6Hr1G076070	MLOC_73298	Protein kinase superfamily protein	GO:0004672, GO:0005524, GO:0006468	PF07714, PF14381	IPR000719, IPR001245, IPR011009, IPR017441	down
HORVU6Hr1G076450	MLOC_22943	LLA-115	none	none	none	down		down	down
HORVU6Hr1G076530	MLOC_74673	unknown function	none	none	none	up	up	up
HORVU6Hr1G076880	MLOC_15707	Glycine cleavage system H protein	GO:0005960, GO:0019464	PF01597	IPR000089, IPR002930, IPR003016, IPR011053, IPR017453			up	up
HORVU6Hr1G077070	MLOC_10709	histidine kinase 3	GO:0000155, GO:0000160, GO:0007165, GO:0016310, GO:0016772	PF00072, PF00512, PF02518, PF03924	IPR001789, IPR003594, IPR003661, IPR004358, IPR005467, IPR006189, IPR011006				up
HORVU6Hr1G077120	MLOC_74646	U-box domain-containing protein 21	GO:0004842, GO:0005488, GO:0016567	PF04564	IPR003613, IPR011989, IPR013083, IPR016024	down			down
HORVU6Hr1G077270	MLOC_57751	LLA-115	none	none	none	down	down
HORVU6Hr1G077430	MLOC_56423	Chaperone protein DnaJ	none	PF00226	IPR001623, IPR018253	up
HORVU6Hr1G077610	MLOC_52308	RING/U-box superfamily protein	GO:0005515, GO:0008270	PF13639	IPR001841, IPR013083			up	up
HORVU6Hr1G077710	MLOC_75175	heat shock protein 21	none	PF00011	IPR002068, IPR008978			up	up
HORVU6Hr1G077780	MLOC_51907	EXORDIUM like 2	none	PF04674	IPR006766	up	up		up
HORVU6Hr1G078420	MLOC_27851	alpha-amylase-like	GO:0003824, GO:0004556, GO:0005509, GO:0005975, GO:0043169	PF00128, PF07821	IPR006046, IPR006047, IPR006589, IPR012850, IPR013775, IPR013780, IPR013781, IPR017853	down
HORVU6Hr1G079030	MLOC_11534	temperature-induced lipocalin	GO:0005215	PF08212	IPR000566, IPR002446, IPR011038, IPR012674, IPR022271, IPR022272	up	up
HORVU6Hr1G079140	MLOC_55975	Bifunctional D-cysteine desulfhydrase/1-aminocyclopropane-1-carboxylate deaminase, mitochondrial	none	PF00291	IPR001926	up	up	up	up
HORVU6Hr1G079630	MLOC_65491	Glucan endo-1,3-beta-glucosidase 10	GO:0004553, GO:0005975	PF00332	IPR000490, IPR013781, IPR017853	up		up	up
HORVU6Hr1G080340	MLOC_20119	Ethylene-responsive transcription factor 5	GO:0003677, GO:0003700, GO:0006355	PF00847	IPR001471, IPR016177		up	up	up
HORVU6Hr1G080490	MLOC_62580	ARM repeat superfamily protein	GO:0005488	none	IPR011989, IPR016024	up	up
HORVU6Hr1G080620	MLOC_71631	Remorin family protein	none	PF03763	IPR005516			up
HORVU6Hr1G081020	MLOC_54406	Tetratricopeptide repeat protein 38	none	none	none		up
HORVU6Hr1G081400	MLOC_6736	Protein LURP-one-related 11	none	PF04525	IPR007612, IPR025659	down	down
HORVU6Hr1G081470	MLOC_37029	Chalcone-flavonone isomerase family protein	GO:0016872	PF02431	IPR016087		up
HORVU6Hr1G083600	MLOC_26641	unknown function	none	none	none	up	up
HORVU6Hr1G083720	MLOC_20163	Transmembrane amino acid transporter family protein	none	PF01490	IPR013057	up	up
HORVU6Hr1G083840	MLOC_51556	Serine/arginine-rich splicing factor 7	GO:0000166, GO:0003676, GO:0008270	PF00076, PF00098	IPR000504, IPR001878, IPR012677			down
HORVU6Hr1G083960	MLOC_23268	Dehydrin	GO:0006950, GO:0009415	PF00257	IPR000167, IPR030513	up	up		down
HORVU6Hr1G084010	unknown	Dehydrin 7	GO:0006950, GO:0009415	PF00257	IPR000167, IPR030513	up	up		up
HORVU6Hr1G084070	unknown	Dehydrin DHN3	GO:0006950, GO:0009415	PF00257	IPR000167, IPR030513	up	up	up	up
HORVU6Hr1G084490	unknown	undescribed protein	none	none	none				down
HORVU6Hr1G085870	MLOC_11918	Transmembrane 9 superfamily member 11	GO:0016021	PF02990	IPR004240		down	up
HORVU6Hr1G086570	MLOC_73842	Embryogenesis transmembrane protein-like	none	PF13962	IPR026961		down
HORVU6Hr1G086910	MLOC_72841	Serine-rich protein	none	none	none		up
HORVU6Hr1G086940	MLOC_69919	Bifunctional nuclease	GO:0004518	PF02577	IPR003729		down
HORVU6Hr1G087000	MLOC_70130	Heparanase-like protein 3	GO:0005975, GO:0016020, GO:0016798	PF03662	IPR005199, IPR013781, IPR017853	down	down
HORVU6Hr1G087420	MLOC_74488	Protein of unknown function (DUF3531)	none	PF12049	IPR021920				up
HORVU6Hr1G087990	MLOC_15021	PAP-specific phosphatase HAL2-like	GO:0006790, GO:0008441, GO:0046854	PF00459	IPR000760, IPR006239, IPR020550, IPR020583	up	up
HORVU6Hr1G088140	MLOC_51312	Auxin-responsive protein IAA9	GO:0005515, GO:0005634, GO:0006355	PF02309	IPR000270, IPR003311	up	up
HORVU6Hr1G088430	MLOC_29550	2-oxoglutarate (2OG) and Fe(II)-dependent oxygenase superfamily protein	GO:0016491, GO:0055114	PF03171	IPR005123, IPR027443	down			down
HORVU6Hr1G088440	MLOC_29550	2-oxoglutarate (2OG) and Fe(II)-dependent oxygenase superfamily protein	GO:0016491, GO:0055114	PF03171, PF14226	IPR005123, IPR026992, IPR027443	down	down	down	down
HORVU6Hr1G088980	MLOC_64190	receptor kinase 3	GO:0004672, GO:0005524, GO:0006468	PF00069, PF01657	IPR000719, IPR002290, IPR002902, IPR008271, IPR011009, IPR013320, IPR017441	down			down
HORVU6Hr1G089780	MLOC_61193	glutathione reductase	GO:0016491, GO:0045454, GO:0050660, GO:0055114	PF02852, PF07992	IPR004099, IPR016156, IPR023753		down
HORVU6Hr1G090560	MLOC_17220	Glutathione S-transferase family protein	GO:0005515	PF02798, PF14497	IPR004045, IPR004046, IPR010987, IPR012336	down	down
HORVU6Hr1G090780	MLOC_34512	Protein kinase superfamily protein	GO:0004672, GO:0004674, GO:0005524, GO:0006468, GO:0048544	PF00954, PF01453, PF07714, PF08276	IPR000719, IPR000858, IPR001245, IPR001480, IPR002290, IPR003609, IPR008271, IPR011009, IPR013320, IPR017441, IPR024171			down
HORVU6Hr1G091360	MLOC_11785	OTU domain-containing protein 5-B	none	PF02338	IPR003323		down	down
HORVU6Hr1G091430	MLOC_11785	OTU domain-containing protein 5-B	none	PF02338	IPR003323	down
HORVU6Hr1G091700	MLOC_53881	Ethylene receptor 3	GO:0000155, GO:0000160, GO:0004673, GO:0005515, GO:0005789, GO:0007165, GO:0010105, GO:0038199, GO:0050896, GO:0051740	PF00072, PF00512, PF01590	IPR001789, IPR003018, IPR003594, IPR003661, IPR011006, IPR014525, IPR029016		down
HORVU6Hr1G092150	MLOC_14918	Leucine-rich repeat receptor-like protein kinase family protein	GO:0005515	PF08263, PF13855	IPR001611, IPR003591, IPR013210, IPR032675		down
HORVU6Hr1G092270	MLOC_16732	Cytochrome P450 superfamily protein	GO:0005506, GO:0016705, GO:0020037, GO:0055114	PF00067	IPR001128, IPR002401	down	down
HORVU6Hr1G092620	unknown	Serine/threonine-protein kinase	GO:0004672, GO:0004674, GO:0005524, GO:0006468, GO:0048544	PF00069, PF00954, PF01453, PF08276	IPR000719, IPR000858, IPR001480, IPR002290, IPR003609, IPR008271, IPR011009, IPR013320, IPR017441, IPR024171		down
HORVU6Hr1G092630	unknown	Wound-induced protein	GO:0042742, GO:0050832	PF00967	IPR001153, IPR009009, IPR018226	down		down
HORVU6Hr1G092860	MLOC_57351	ROP guanine nucleotide exchange factor 5	GO:0005089	PF03759	IPR005512		up		up
HORVU6Hr1G092960	MLOC_45747	Aquaporin-like superfamily protein	GO:0005215, GO:0006810, GO:0016020	PF00230	IPR000425, IPR022357, IPR023271	down
HORVU6Hr1G093240	MLOC_62874	High-light-induced protein, chloroplastic	none	none	IPR023329	down
HORVU6Hr1G093680	MLOC_68705	Protein of unknown function (DUF789)	none	PF05623	IPR008507	down
HORVU6Hr1G093740	MLOC_34638	Receptor-like protein kinase	GO:0004672, GO:0005509, GO:0005515, GO:0005524, GO:0006468, GO:0030247	PF00069, PF13947	IPR000719, IPR000742, IPR001881, IPR002290, IPR008271, IPR009030, IPR011009, IPR013320, IPR017441, IPR018097, IPR025287			down	down
HORVU6Hr1G093820	MLOC_65657	receptor kinase 3	GO:0004672, GO:0005509, GO:0005515, GO:0005524, GO:0006468	PF07645, PF07714	IPR000152, IPR000719, IPR000742, IPR001245, IPR001881, IPR002290, IPR008271, IPR011009, IPR013320, IPR017441, IPR018097				down
HORVU6Hr1G093860	MLOC_67623	unknown protein							up
HORVU6Hr1G093960	MLOC_24269	TCP family transcription factor	none	PF03634	IPR005333, IPR017887		down
HORVU6Hr1G094070	unknown	undescribed protein	none	none	none	up	up		up
HORVU6Hr1G094480	MLOC_75500	Flavin-containing monooxygenase family protein	GO:0004499, GO:0016491, GO:0050660, GO:0050661, GO:0055114	PF00743	IPR000960, IPR020946, IPR023753	down	down		down
HORVU6Hr1G094790	MLOC_69330	receptor-like protein kinase 1	GO:0004672, GO:0005524, GO:0006468	PF07714	IPR000719, IPR001245, IPR002290, IPR008271, IPR011009				down
HORVU7Hr1G000120	MLOC_53087	Protein of unknown function (DUF3754)	none	PF12576	IPR022227			down
HORVU7Hr1G000900	MLOC_75066	plastocyanin 1	GO:0005507, GO:0009055	PF00127	IPR000923, IPR001235, IPR002387, IPR008972, IPR028871	up	down
HORVU7Hr1G001030	MLOC_45344	inter-alpha-trypsin inhibitor heavy chain-related	none	PF00092, PF14624	IPR002035, IPR032838	down	down
HORVU7Hr1G001170	MLOC_69602	Leucine-rich repeat receptor-like protein kinase family protein	GO:0005515	PF00560, PF13855	IPR001611, IPR003591, IPR032675	down			down
HORVU7Hr1G001670	MLOC_10643	Rp1-like protein	GO:0043531	PF00931	IPR002182, IPR027417, IPR032675	down	down	down
HORVU7Hr1G002210	MLOC_70480	Ferredoxin--NADP reductase	GO:0016491, GO:0055114	PF00175	IPR001433, IPR001709, IPR015701, IPR017927, IPR017938	up
HORVU7Hr1G002370	MLOC_74611	Glutathione S-transferase family protein	GO:0005515	PF00043, PF13417	IPR004045, IPR004046, IPR010987, IPR012336	down	down
HORVU7Hr1G002600	MLOC_78198	nodulin MtN21 /EamA-like transporter family protein	GO:0016020, GO:0016021	PF00892	IPR000620		down
HORVU7Hr1G002820	MLOC_81608	alpha dioxygenase	GO:0004601, GO:0006979, GO:0020037, GO:0055114	PF03098	IPR010255, IPR019791	down	down		up
HORVU7Hr1G003170	MLOC_79789	LEA	GO:0009790	PF03760	IPR005513	up	up	up	up
HORVU7Hr1G004350	MLOC_71305	B3 domain-containing protein	GO:0003677	PF02362	IPR003340, IPR015300			up
HORVU7Hr1G006250	MLOC_54691	Chromosome 3B, genomic scaffold, cultivar Chinese Spring	none	none	none	down	down
HORVU7Hr1G006490	MLOC_57334	60 kDa chaperonin 1	GO:0005524, GO:0005737, GO:0006457, GO:0042026	PF00118	IPR001844, IPR002423, IPR018370, IPR027409, IPR027413			up	up
HORVU7Hr1G006520	MLOC_55375	Coffea canephora DH200=94 genomic scaffold, scaffold_59	none	none	none		down
HORVU7Hr1G006700	unknown	Eukaryotic aspartyl protease family protein	none	PF14541, PF14543	IPR021109, IPR032799, IPR032861	down
HORVU7Hr1G006910	unknown	3-ketoacyl-CoA synthase 5	GO:0003824, GO:0006633, GO:0008152, GO:0008610, GO:0016020, GO:0016747	PF08392, PF08541	IPR012392, IPR013601, IPR013747, IPR016039	down	down	down	down
HORVU7Hr1G006980	MLOC_36864	NBS-LRR disease resistance protein	GO:0043531	PF00931	IPR002182, IPR027417, IPR032675			down
HORVU7Hr1G007220	MLOC_50162	sucrose synthase 1	none	PF00534	IPR001296	down	down	down	down
HORVU7Hr1G007520	MLOC_70200	Leucine-rich repeat receptor-like protein kinase family protein	GO:0004672, GO:0005515, GO:0005524, GO:0006468	PF00069, PF08263, PF13855	IPR000719, IPR001611, IPR002290, IPR003591, IPR008271, IPR011009, IPR013210, IPR013320, IPR017441, IPR032675	down	down	down	down
HORVU7Hr1G007590	MLOC_49687	GDSL esterase/lipase	GO:0016788	PF00657	IPR001087, IPR013830	up	up	up	up
HORVU7Hr1G007690	MLOC_31348	Eukaryotic aspartyl protease family protein	none	PF14541, PF14543	IPR021109, IPR032799, IPR032861	up	up
HORVU7Hr1G007800	unknown	undescribed protein	GO:0009790	PF03760	IPR005513	up	up	up	up
HORVU7Hr1G008050	MLOC_70345	Receptor-like protein kinase	GO:0004672, GO:0005515, GO:0005524, GO:0006468	PF00069, PF08263, PF13855	IPR000719, IPR001611, IPR002290, IPR003591, IPR008271, IPR011009, IPR013210, IPR013320, IPR017441, IPR032675			down	down
HORVU7Hr1G008150	MLOC_71681	sulfotransferase 16	GO:0008146	PF00685	IPR000863, IPR027417	down
HORVU7Hr1G009350	MLOC_75896	unknown function	none	PF04578, PF13968	IPR007658, IPR025315	down	down
HORVU7Hr1G009420	MLOC_61187	Eukaryotic aspartyl protease family protein	none	PF14541, PF14543	IPR021109, IPR032799, IPR032861		down
HORVU7Hr1G009580	unknown	undescribed protein	none	none	none		down
HORVU7Hr1G009680	MLOC_13047	Leucine-rich receptor-like protein kinase family protein	GO:0004672, GO:0005515, GO:0005524, GO:0006468	PF00069, PF08263	IPR000719, IPR001611, IPR002290, IPR003591, IPR008271, IPR011009, IPR013210, IPR013320, IPR017441, IPR032675	down
HORVU7Hr1G009800	MLOC_75575	LEA	GO:0009790	PF03760	IPR005513	up		up	up
HORVU7Hr1G010230	unknown	BAG family molecular chaperone regulator 1	GO:0005515, GO:0051087	PF02179	IPR000626, IPR003103, IPR029071			up	up
HORVU7Hr1G010740	MLOC_36933	Protein kinase family protein	GO:0004672, GO:0005509, GO:0005515, GO:0005524, GO:0006468, GO:0030247	PF00069, PF13947	IPR000152, IPR000719, IPR000742, IPR001881, IPR002290, IPR008271, IPR011009, IPR013032, IPR013320, IPR018097, IPR025287				down
HORVU7Hr1G011580	MLOC_58830	Bark storage protein A	GO:0003824, GO:0009116	PF01048	IPR000845	down	down
HORVU7Hr1G011890	MLOC_66349	SPX domain-containing membrane protein	GO:0016021, GO:0055085	PF03105, PF07690	IPR004331, IPR011701, IPR020846			down	down
HORVU7Hr1G012300	MLOC_19556	LEA	GO:0009790	PF03760	IPR005513	up	up	up
HORVU7Hr1G012380	MLOC_64657	Starch synthase 2, chloroplastic/amyloplastic	GO:0004373	PF00534, PF08323	IPR001296, IPR011835, IPR013534	up			up
HORVU7Hr1G012600	MLOC_65765	xyloglucan endotransglucosylase/hydrolase 25	GO:0004553, GO:0005618, GO:0005975, GO:0006073, GO:0010411, GO:0016762, GO:0042546, GO:0048046	PF00722, PF06955	IPR000757, IPR008264, IPR010713, IPR013320, IPR016455			up	up
HORVU7Hr1G013170	MLOC_46161	Flavin-containing monooxygenase family protein	GO:0004499, GO:0016491, GO:0050660, GO:0050661, GO:0055114	PF00743	IPR000103, IPR020946, IPR023753			up
HORVU7Hr1G013470	MLOC_26046	Peroxidase superfamily protein	GO:0004601, GO:0006979, GO:0020037, GO:0055114	PF00141	IPR000823, IPR002016, IPR010255, IPR019793, IPR019794	down	down	down
HORVU7Hr1G014410	MLOC_52740	EXORDIUM like 3	none	PF04674	IPR006766		down
HORVU7Hr1G018590	unknown	Leucine-rich receptor-like protein kinase family protein	GO:0004672, GO:0005515, GO:0005524, GO:0006468	PF00069, PF13855	IPR000719, IPR001611, IPR002290, IPR008271, IPR011009, IPR017441, IPR032675		down
HORVU7Hr1G020370	MLOC_806	Carbonic anhydrase	none	PF00194	IPR001148		down
HORVU7Hr1G020660	MLOC_13765	receptor kinase 3	GO:0004672, GO:0005509, GO:0005515, GO:0005524, GO:0006468, GO:0030247	PF07645, PF07714, PF13947	IPR000152, IPR000719, IPR000742, IPR001245, IPR001881, IPR002290, IPR008271, IPR011009, IPR013320, IPR017441, IPR018097, IPR025287			down
HORVU7Hr1G021490	MLOC_73552	2-oxoglutarate (2OG) and Fe(II)-dependent oxygenase superfamily protein	GO:0016491, GO:0055114	PF03171, PF14226	IPR005123, IPR026992, IPR027443			down
HORVU7Hr1G021840	MLOC_67174	Histone superfamily protein	GO:0000786, GO:0003677, GO:0046982	PF00125	IPR000164, IPR007125, IPR009072	down
HORVU7Hr1G023610	MLOC_4044	F-box protein MAX2	none	none	IPR006553, IPR032675			up
HORVU7Hr1G024670	MLOC_65304	GDSL esterase/lipase	GO:0016788	PF00657	IPR001087, IPR013830				down
HORVU7Hr1G024930	MLOC_57450	Subtilisin-like protease	GO:0004252, GO:0006508	PF00082, PF05922	IPR000209, IPR010259, IPR015500, IPR022398, IPR023828	down	down
HORVU7Hr1G024980	MLOC_12388	ABC transporter C family member 10	GO:0005524, GO:0006810, GO:0016021, GO:0016887, GO:0042626, GO:0055085	PF00005, PF00664	IPR003439, IPR003593, IPR011527, IPR017871, IPR027417	up	up
HORVU7Hr1G024990	MLOC_44081	Histone superfamily protein	GO:0000786, GO:0003677, GO:0046982	PF00125	IPR000164, IPR007125, IPR009072				up
HORVU7Hr1G025000	MLOC_2098	ABC transporter C family member 10	GO:0005524, GO:0006810, GO:0016021, GO:0016887, GO:0042626, GO:0055085	PF00005, PF00664	IPR003439, IPR003593, IPR011527, IPR017871, IPR027417			up
HORVU7Hr1G025130	MLOC_11694	Thioesterase superfamily protein	none	PF03061	IPR006683, IPR029069	down	down
HORVU7Hr1G025160	unknown	Histone superfamily protein	GO:0000786, GO:0003677, GO:0046982	PF00125	IPR000164, IPR007125, IPR009072			up
HORVU7Hr1G025390	MLOC_70501	Glycogen synthase	GO:0004373	PF00534, PF08323	IPR001296, IPR011835, IPR013534	up
HORVU7Hr1G025620	MLOC_23055	Class E vacuolar protein-sorting machinery protein hse1	GO:0005622, GO:0006886	PF00790, PF03127	IPR002014, IPR004152, IPR008942, IPR018205				down
HORVU7Hr1G025750	MLOC_74784	Sulfite exporter TauE/SafE family protein	GO:0016021	PF01925	IPR002781		down
HORVU7Hr1G025800	MLOC_36824	serine carboxypeptidase-like 19	GO:0004185, GO:0006508	PF00450	IPR001563, IPR029058		down
HORVU7Hr1G026510	unknown	Cytochrome P450 superfamily protein	GO:0005506, GO:0016705, GO:0020037, GO:0055114	PF00067	IPR001128	up	up
HORVU7Hr1G026630	MLOC_51673	FAD-binding Berberine family protein	GO:0003824, GO:0016491, GO:0016614, GO:0050660, GO:0055114	PF01565, PF08031	IPR006094, IPR012951, IPR016166, IPR016169			down	down
HORVU7Hr1G026740	MLOC_56175	F-box protein	none	none	IPR032675	down
HORVU7Hr1G026770	MLOC_56175	F-box protein	GO:0005515	PF12937	IPR001810, IPR006553, IPR032675	down
HORVU7Hr1G026940	MLOC_76250	Ethylene-responsive transcription factor 5	GO:0003677, GO:0003700, GO:0006355	PF00847	IPR001471, IPR016177	up	up	up	up
HORVU7Hr1G027560	MLOC_51238	CONSTANS-like 5	GO:0005515, GO:0005622, GO:0008270	PF06203	IPR000315, IPR010402			up	up
HORVU7Hr1G027860	MLOC_9861	Glycogen debranching enzyme	GO:0004553, GO:0005975, GO:0051060	PF02922, PF11852	IPR004193, IPR011839, IPR013781, IPR013783, IPR014756, IPR017853, IPR024561				up
HORVU7Hr1G028160	MLOC_14795	receptor kinase 2	GO:0004672, GO:0005515, GO:0005524, GO:0006468	PF07714, PF08263, PF13855	IPR000719, IPR001245, IPR001611, IPR002290, IPR008271, IPR011009, IPR013210, IPR013320, IPR017441, IPR032675			down
HORVU7Hr1G028250	MLOC_52403	vesicle-associated membrane protein 713	GO:0016021, GO:0016192	PF00957	IPR001388	up
HORVU7Hr1G028260	MLOC_938	DCD (Development and Cell Death) domain protein	none	PF10539	IPR013989	up	up
HORVU7Hr1G028730	MLOC_37576	receptor kinase 2	GO:0004672, GO:0005524, GO:0006468, GO:0030246	PF00069, PF00139	IPR000719, IPR001220, IPR002290, IPR008271, IPR011009, IPR013320, IPR017441	down		down	down
HORVU7Hr1G028850	MLOC_4579	Protein SRG1	none	none	IPR027443	down
HORVU7Hr1G029060	MLOC_5121	Major facilitator superfamily protein	none	PF06813	IPR010658, IPR020846			down
HORVU7Hr1G029290	MLOC_52753	Plant protein of unknown function (DUF247)	none	PF03140	IPR004158	down	down
HORVU7Hr1G029720	MLOC_36715	RING/U-box superfamily protein	GO:0005515, GO:0008270	PF13639	IPR001841, IPR013083		up
HORVU7Hr1G029750	MLOC_44066	Protein kinase superfamily protein	GO:0004672, GO:0005515, GO:0005524, GO:0006468	PF00564, PF07714	IPR000270, IPR000719, IPR001245, IPR002290, IPR008271, IPR011009, IPR017441	up	up
HORVU7Hr1G030160	MLOC_53324	Bidirectional sugar transporter N3	GO:0016021	PF03083	IPR004316			up	up
HORVU7Hr1G030670	MLOC_67017	hydroxycinnamoyl-CoA shikimate/quinate hydroxycinnamoyl transferase	GO:0016747	PF02458	IPR003480, IPR023213	up	up	up
HORVU7Hr1G030690	MLOC_5940	unknown function	none	none	IPR029044	up	up	up	up
HORVU7Hr1G031610	MLOC_58609	unknown function	none	PF12274	IPR022059		down
HORVU7Hr1G031650	unknown	sugar transporter 4	GO:0005215, GO:0016020, GO:0016021, GO:0022857, GO:0022891, GO:0055085	PF00083	IPR003663, IPR005828, IPR005829, IPR020846	down
HORVU7Hr1G031800	MLOC_38343	UDP-Glycosyltransferase superfamily protein	GO:0008152, GO:0016758	PF00201	IPR002213	down	down
HORVU7Hr1G031990	unknown	CAAX amino terminal protease family protein	none	none	none		down
HORVU7Hr1G033170	MLOC_71914	Inositol-tetrakisphosphate 1-kinase 5	GO:0000287, GO:0005524, GO:0005622, GO:0032957, GO:0046872, GO:0047325, GO:0052725, GO:0052726	PF05770	IPR008656, IPR011761		down
HORVU7Hr1G033230	MLOC_11770	sucrose synthase 4	GO:0005985, GO:0016157	PF00534, PF00862	IPR000368, IPR001296, IPR012820	down
HORVU7Hr1G033450	MLOC_56083	unknown protein				up	up
HORVU7Hr1G033520	MLOC_25651	receptor-like protein kinase 1	GO:0004672, GO:0005524, GO:0006468, GO:0030246	PF00069, PF00139	IPR000719, IPR001220, IPR002290, IPR008271, IPR011009, IPR013320, IPR017441, IPR019825	down	down
HORVU7Hr1G033530	MLOC_48531	Cysteine-rich venom protein	GO:0005576	PF00188	IPR001283, IPR002413, IPR014044, IPR018244	down	down		down
HORVU7Hr1G033620	MLOC_48531	Cysteine-rich venom protein	GO:0005576	PF00188	IPR001283, IPR002413, IPR014044, IPR018244	down	down	down	down
HORVU7Hr1G033900	MLOC_15907	10 kDa chaperonin	GO:0005524, GO:0005737, GO:0006457, GO:0046914, GO:1901671	PF00166	IPR011032, IPR017416, IPR018369, IPR020818				up
HORVU7Hr1G034070	MLOC_51268	Aldose 1-epimerase	GO:0003824, GO:0005975, GO:0016853, GO:0030246	PF01263	IPR008183, IPR011013, IPR014718	up		up
HORVU7Hr1G034470	unknown	Histone superfamily protein	GO:0000786, GO:0003677, GO:0046982	PF00125	IPR000164, IPR007125, IPR009072	up		up	up
HORVU7Hr1G034560	MLOC_53933	Choline/ethanolaminephosphotransferase 1	GO:0008654, GO:0016020, GO:0016780	PF01066	IPR000462, IPR014472	up
HORVU7Hr1G035010	unknown	anaerobic respiration	none	none	none		down
HORVU7Hr1G035020	MLOC_72278	Alpha-amylase/trypsin inhibitor	GO:0004867	PF00234	IPR006105, IPR006106, IPR013771, IPR016140		down
HORVU7Hr1G035730	MLOC_54458	EF hand family protein	GO:0005509	PF13202	IPR002048, IPR011992, IPR018247		down
HORVU7Hr1G036450	MLOC_57733	O-fucosyltransferase family protein	none	PF10250	IPR019378, IPR024709				up
HORVU7Hr1G036470	MLOC_41281	heat shock protein 21	none	PF00011	IPR002068, IPR008978				up
HORVU7Hr1G036540	MLOC_41281	heat shock protein 21	none	PF00011	IPR002068, IPR008978				up
HORVU7Hr1G036570	MLOC_568	heat shock protein 21	none	PF00011	IPR002068, IPR008978				up
HORVU7Hr1G036710	MLOC_56194	EXORDIUM like 2	none	PF04674	IPR006766	down
HORVU7Hr1G036720	MLOC_9957	germin-like protein 1	GO:0030145, GO:0045735	PF00190	IPR001929, IPR006045, IPR011051, IPR014710, IPR019780	down	down	down	down
HORVU7Hr1G036960	MLOC_74692	unknown function	none	none	none		down	down	down
HORVU7Hr1G037080	MLOC_36316	annexin 1	GO:0005509, GO:0005544	PF00191	IPR018502			up
HORVU7Hr1G037320	MLOC_77446	MBOAT (membrane bound O-acyl transferase) family protein	none	PF13813	IPR032805			down	down
HORVU7Hr1G037600	MLOC_21289	sodium/calcium exchanger family protein / calcium-binding EF hand family protein	GO:0005509, GO:0016021, GO:0055085	PF01699	IPR002048, IPR004837, IPR011992, IPR018247	up	up
HORVU7Hr1G037910	unknown	shikimate kinase 1	none	PF01202	IPR000623, IPR023000, IPR027417, IPR031322			up
HORVU7Hr1G038130	MLOC_60577	TCP family transcription factor	none	PF03634	IPR005333, IPR017887		down
HORVU7Hr1G038440	unknown	cellulose synthase-like A3	none	PF13641	IPR029044			down
HORVU7Hr1G038510	MLOC_74485	UDP-Glycosyltransferase superfamily protein	GO:0008152, GO:0016758	PF00201	IPR002213			up	up
HORVU7Hr1G038570	MLOC_30809	Leucine-rich repeat receptor-like protein kinase family protein	none	PF08263	IPR013210, IPR032675		down
HORVU7Hr1G039800	MLOC_13654	UDP-Glycosyltransferase superfamily protein	GO:0008152, GO:0016758	PF00201	IPR002213			down
HORVU7Hr1G040460	MLOC_25901	Pyruvate dehydrogenase E1 component subunit alpha	GO:0004739, GO:0006086, GO:0008152, GO:0016624, GO:0043231	PF00676	IPR001017, IPR017597, IPR029061	up	up	up	up
HORVU7Hr1G040590	MLOC_7501	Hexosyltransferase	GO:0016757	PF01501	IPR002495, IPR029044				up
HORVU7Hr1G040970	MLOC_64229	Potassium channel SKOR	none	PF11834	IPR021789	up	up	up
HORVU7Hr1G041230	MLOC_61774	Protein TIFY 3A	none	PF06200, PF09425	IPR010399, IPR018467		down		up
HORVU7Hr1G041320	unknown	undescribed protein	none	none	none			down	down
HORVU7Hr1G041470	MLOC_28425	Caleosin-related family protein	none	PF05042	IPR007736, IPR011992		up	up	up
HORVU7Hr1G042120	MLOC_7057	Protein NRT1/ PTR FAMILY 3.1	GO:0005215, GO:0006810, GO:0016020	PF00854	IPR000109, IPR020846	down	down
HORVU7Hr1G042260	MLOC_12768	Cytochrome P450 superfamily protein	GO:0005506, GO:0016705, GO:0020037, GO:0055114	PF00067	IPR001128, IPR002401, IPR017972			up	up
HORVU7Hr1G042490	MLOC_15284	Eukaryotic aspartyl protease family protein	GO:0004190, GO:0006508	PF14541, PF14543	IPR001461, IPR001969, IPR021109, IPR032799, IPR032861	down	down
HORVU7Hr1G042790	MLOC_66700	ADP,ATP carrier protein 3, mitochondrial	GO:0005215, GO:0005743, GO:0006810, GO:0055085	PF00153	IPR002067, IPR002113, IPR018108, IPR023395	up	up	up	up
HORVU7Hr1G042890	MLOC_4028	UDP-Glycosyltransferase superfamily protein	GO:0008152, GO:0016758	PF00201	IPR002213	up	up	up	up
HORVU7Hr1G042900	MLOC_4028	UDP-Glycosyltransferase superfamily protein	GO:0008152, GO:0016758	PF00201	IPR002213	up	up	up	up
HORVU7Hr1G043150	MLOC_55933	Protein kinase superfamily protein	GO:0004672, GO:0005524, GO:0006468	PF07714	IPR000719, IPR001245, IPR002290, IPR008271, IPR011009	down
HORVU7Hr1G043410	MLOC_37640	DNA repair protein complementing XP-C cells homolog	GO:0003677	PF03835, PF10403, PF10404, PF10405	IPR018325, IPR018326, IPR018327, IPR018328	up
HORVU7Hr1G043620	MLOC_6766	receptor-like protein kinase 2	GO:0004672, GO:0005524, GO:0006468	PF00069	IPR000719, IPR002290, IPR008271, IPR011009	down	down	down	down
HORVU7Hr1G043630	unknown	Peptide transporter PTR2	none	none	none	up			up
HORVU7Hr1G044020	MLOC_72942	Embryogenesis transmembrane protein-like	none	PF13962	IPR026961			down
HORVU7Hr1G044100	MLOC_64323	Embryogenesis transmembrane protein-like	none	PF13962	IPR026961			down
HORVU7Hr1G044150	MLOC_10689	undescribed protein	none	none	none				up
HORVU7Hr1G044210	MLOC_5934	Embryogenesis transmembrane protein-like	none	PF13962	IPR026961				down
HORVU7Hr1G044280	MLOC_10401	Protein of unknown function, DUF599	none	PF04654	IPR006747	down	down
HORVU7Hr1G044510	unknown	receptor kinase 2	GO:0004672, GO:0005515, GO:0005524, GO:0006468	PF07714, PF13855	IPR000719, IPR001245, IPR001611, IPR002290, IPR008271, IPR011009, IPR013320, IPR032675	up
HORVU7Hr1G045150	MLOC_25051	unknown function	GO:0006355, GO:0043401	none	IPR000536	up	up
HORVU7Hr1G045630	MLOC_73911	HVA22 homologue E	none	PF03134	IPR004345	up	up	up
HORVU7Hr1G046030	MLOC_1740	Na+/H+ (sodium hydrogen) exchanger 3	GO:0006812, GO:0006814, GO:0006885, GO:0015299, GO:0015385, GO:0016021, GO:0055085	PF00999	IPR004709, IPR006153	up	up
HORVU7Hr1G046040	MLOC_70738	Carboxyl-terminal-processing protease	GO:0005515, GO:0006508, GO:0008236	PF00595, PF03572	IPR001478, IPR004447, IPR005151, IPR029045	up	up
HORVU7Hr1G046050	MLOC_70738	Carboxyl-terminal-processing protease	GO:0005515, GO:0006508, GO:0008236	PF00595, PF03572	IPR001478, IPR004447, IPR005151, IPR029045	up	up
HORVU7Hr1G046210	unknown	undescribed protein	none	none	none		up
HORVU7Hr1G046660	MLOC_13102	Phosphatidylethanolamine-binding protein 1	none	PF01161	IPR001858, IPR008914	up	up	up	up
HORVU7Hr1G046830	MLOC_68118	unknown function	none	none	none	up	up
HORVU7Hr1G047000	MLOC_10731	ATP-dependent 6-phosphofructokinase 3	GO:0003872, GO:0005524, GO:0006002, GO:0006096, GO:0047334	PF00365	IPR000023, IPR011183, IPR013981, IPR022953			down
HORVU7Hr1G047150	MLOC_71028	Protein kinase superfamily protein	GO:0004672, GO:0004674, GO:0005524, GO:0006468	PF00069, PF01453	IPR000719, IPR001480, IPR002290, IPR008271, IPR011009, IPR013320, IPR017441, IPR024171		down
HORVU7Hr1G047740	MLOC_59091	L-gulonolactone oxidase 2	GO:0003824, GO:0003885, GO:0016020, GO:0016491, GO:0016614, GO:0050660, GO:0055114	PF01565, PF04030	IPR006094, IPR007173, IPR010030, IPR016164, IPR016166, IPR016167, IPR016169	down	down
HORVU7Hr1G048330	unknown	Alpha-glucan water dikinase 2	GO:0003824, GO:0005524, GO:0016301, GO:0016310	PF01326	IPR002192, IPR013815, IPR013816	up		down	down
HORVU7Hr1G048620	MLOC_61836	Copine family protein 2	none	PF07002	IPR002035, IPR010734				up
HORVU7Hr1G048940	MLOC_15215	WPP domain-interacting protein 1	none	none	none	up	up
HORVU7Hr1G049150	unknown	pentatricopeptide repeat 336	none	PF01535, PF13041	IPR002885			down	down
HORVU7Hr1G049380	MLOC_38722	Pentatricopeptide repeat-containing protein	GO:0005515	PF01535, PF13041, PF13812	IPR002885, IPR011990	down
HORVU7Hr1G049860	MLOC_39328	FASCICLIN-like arabinogalactan-protein 12	none	PF02469	IPR000782				up
HORVU7Hr1G049870	MLOC_69030	alanine:glyoxylate aminotransferase	GO:0003824	PF00266	IPR000192, IPR015421, IPR015422, IPR015424, IPR020578, IPR024169		down
HORVU7Hr1G049960	MLOC_6476	Glycerophosphodiester phosphodiesterase GDPDL4	GO:0006629, GO:0008081	PF03009	IPR017946, IPR030395	down	down
HORVU7Hr1G050030	MLOC_74633	tonoplast dicarboxylate transporter	GO:0005215, GO:0006814, GO:0016020, GO:0055085	PF00939	IPR001898	up
HORVU7Hr1G050270	MLOC_5360	Zinc finger A20 and AN1 domain-containing stress-associated protein 11	GO:0003677, GO:0008270	PF01428, PF01754	IPR000058, IPR002653			up
HORVU7Hr1G050710	unknown	undescribed protein	none	none	none		down
HORVU7Hr1G050980	MLOC_5816	unknown protein							down
HORVU7Hr1G051260	MLOC_64881	3-hydroxy-3-methylglutaryl-coenzyme A reductase 3	GO:0004420, GO:0008299, GO:0015936, GO:0016021, GO:0016616, GO:0050661, GO:0050662, GO:0055114	PF00368	IPR002202, IPR004554, IPR009023, IPR009029, IPR023074, IPR023076, IPR023282		up
HORVU7Hr1G051470	unknown	sulfotransferase 2A	GO:0008146	PF00685	IPR000863, IPR027417	down	down
HORVU7Hr1G051560	MLOC_53939	Protein of unknown function, DUF547	none	PF04784, PF14389	IPR006869, IPR025757			up	up
HORVU7Hr1G051730	MLOC_66325	unknown function	none	none	none		up	up	up
HORVU7Hr1G052400	MLOC_13860	TBC1 domain family member 5 homolog A	none	PF00566	IPR000195	down
HORVU7Hr1G054130	MLOC_67736	microtubule-associated protein 65-8	GO:0000226, GO:0000910, GO:0008017	PF03999	IPR007145			down
HORVU7Hr1G054510	MLOC_15632	Peroxidase superfamily protein	GO:0004601, GO:0006979, GO:0020037, GO:0055114	PF00141	IPR000823, IPR002016, IPR010255, IPR019793			down	down
HORVU7Hr1G054610	MLOC_80634	Bifunctional uridylyltransferase/uridylyl-removing enzyme	GO:0008152, GO:0016597	PF01842	IPR002912			up
HORVU7Hr1G054660	MLOC_73803	Chromosome 3B, genomic scaffold, cultivar Chinese Spring	none	PF07762	IPR011676	down
HORVU7Hr1G054710	MLOC_12385	Sugar transporter SWEET	GO:0016021	PF03083	IPR004316	down	down
HORVU7Hr1G055180	MLOC_44870	Transcription factor bHLH137	GO:0046983	PF00010	IPR011598	down	down
HORVU7Hr1G056700	MLOC_6413	BAG family molecular chaperone regulator 3	GO:0005515, GO:0051087	PF00240, PF02179	IPR000626, IPR003103, IPR029071				up
HORVU7Hr1G056820	MLOC_75166	Heat stress transcription factor B-2b	GO:0003700, GO:0005634, GO:0006355, GO:0043565	PF00447	IPR000232, IPR011991	up	up	up	up
HORVU7Hr1G057260	MLOC_72584	Gibberellin receptor GID1	GO:0008152, GO:0016787	PF07859	IPR002168, IPR013094, IPR029058			up	up
HORVU7Hr1G057650	MLOC_6942	RING/U-box superfamily protein	GO:0005515, GO:0008270	PF13639	IPR001841, IPR013083			up
HORVU7Hr1G057740	MLOC_71424	SAUR-like auxin-responsive protein family	GO:0009733	PF02519	IPR003676	down	down
HORVU7Hr1G058730	MLOC_38535	Peptidyl-prolyl cis-trans isomerase 9	GO:0000413, GO:0003755, GO:0005515, GO:0006457	PF00160	IPR001680, IPR002130, IPR015943, IPR017986, IPR020892, IPR029000			up
HORVU7Hr1G060070	MLOC_36663	2-oxoglutarate (2OG) and Fe(II)-dependent oxygenase superfamily protein	GO:0005506, GO:0016491, GO:0055114	PF03171, PF14226	IPR002283, IPR005123, IPR026992, IPR027443			up	up
HORVU7Hr1G064100	MLOC_61260	proton gradient regulation 5	none	none	none	up	up
HORVU7Hr1G065740	MLOC_64700	Transducin/WD40 repeat-like superfamily protein	GO:0005515	PF00400	IPR001680, IPR015943, IPR017986, IPR019775	up
HORVU7Hr1G066970	unknown	Cytochrome P450 superfamily protein	GO:0005506, GO:0016705, GO:0020037, GO:0055114	PF00067	IPR001128, IPR002401		down
HORVU7Hr1G069520	unknown	RNA polymerase sigma-C factor	GO:0003677, GO:0003700, GO:0006352, GO:0006355, GO:0016987	PF04539, PF04542, PF04545	IPR000943, IPR007624, IPR007627, IPR007630, IPR011991, IPR013324, IPR013325, IPR014284		up
HORVU7Hr1G070010	MLOC_57200	cellulose synthase-like D3	GO:0016020, GO:0016760, GO:0030244	PF03552	IPR005150			up	up
HORVU7Hr1G071470	MLOC_34693	nudix hydrolase homolog 8	none	none	none			down
HORVU7Hr1G072690	MLOC_70579	Leucine-rich receptor-like protein kinase family protein	GO:0004672, GO:0005515, GO:0005524, GO:0006468	PF00069, PF08263, PF13855	IPR000719, IPR001611, IPR002290, IPR003591, IPR008271, IPR011009, IPR013210, IPR017441, IPR032675	down	down
HORVU7Hr1G073190	MLOC_65853	ferredoxin-related	none	none	IPR014044			up	up
HORVU7Hr1G073770	MLOC_61005	ATP-dependent RNA helicase eIF4A	GO:0003676, GO:0005524	PF00270, PF00271	IPR001650, IPR011545, IPR014001, IPR014014, IPR027417	down	down
HORVU7Hr1G074660	MLOC_16705	Transmembrane amino acid transporter family protein	none	PF01490	IPR013057				down
HORVU7Hr1G074690	MLOC_18233	glyceraldehyde-3-phosphate dehydrogenase C2	GO:0006006, GO:0016620, GO:0050661, GO:0051287, GO:0055114	PF00044, PF02800	IPR006424, IPR016040, IPR020828, IPR020829, IPR020830, IPR020831			up
HORVU7Hr1G075250	MLOC_76906	40S ribosomal protein S13-1	GO:0003735, GO:0005622, GO:0005840, GO:0006412	PF00312, PF08069	IPR000589, IPR009068, IPR012606, IPR023029			up
HORVU7Hr1G075960	MLOC_78461	WRKY DNA-binding protein 70	GO:0003700, GO:0006355, GO:0043565	PF03106	IPR003657	down	down
HORVU7Hr1G076120	MLOC_56601	Peroxidase superfamily protein	GO:0004601, GO:0006979, GO:0020037, GO:0055114	PF00141	IPR000823, IPR002016, IPR010255, IPR019793, IPR019794				up
HORVU7Hr1G076440	MLOC_44485	E3 ubiquitin-protein ligase KEG	none	none	IPR011009	up	up
HORVU7Hr1G076790	MLOC_37085	Core-2/I-branching beta-1,6-N-acetylglucosaminyltransferase family protein	GO:0008375, GO:0016020	PF02485	IPR003406	up
HORVU7Hr1G077640	MLOC_11873	EamA-like transporter family protein	none	PF03151	IPR004853	up	up
HORVU7Hr1G077740	MLOC_6135	ferredoxin 1	GO:0009055, GO:0022900, GO:0051536, GO:0051537	PF00111	IPR001041, IPR006058, IPR010241, IPR012675	up	up
HORVU7Hr1G077750	MLOC_76968	ferredoxin 1	GO:0009055, GO:0022900, GO:0051536, GO:0051537	PF00111	IPR001041, IPR006058, IPR010241, IPR012675	up
HORVU7Hr1G077860	MLOC_3114	Seed maturation protein	none	none	none	up	up
HORVU7Hr1G078020	MLOC_12712	Pentatricopeptide repeat (PPR) superfamily protein	none	none	none	up
HORVU7Hr1G078670	MLOC_64408	Cleavage and polyadenylation specificity factor subunit 5	GO:0003729, GO:0005849, GO:0006378	PF13869	IPR016706		up
HORVU7Hr1G079210	MLOC_66365	unknown protein					down		down
HORVU7Hr1G079430	MLOC_80629	Polyamine aminopropyltransferase 2	GO:0003824	PF01564	IPR001045, IPR029063, IPR030373, IPR030374	up
HORVU7Hr1G079810	MLOC_75285	GDSL esterase/lipase	GO:0016788	PF00657	IPR001087, IPR013830				down
HORVU7Hr1G080850	MLOC_67569	arabinogalactan protein 16	none	PF06376	IPR009424			up	up
HORVU7Hr1G081290	unknown	Reticulon family protein	none	PF02453	IPR003388	up	up
HORVU7Hr1G082040	MLOC_79165	Late embryogenesis abundant protein D-34	none	PF04927	IPR007011	up	up	up	up
HORVU7Hr1G082090	MLOC_57263	undescribed protein	none	none	none				up
HORVU7Hr1G082450	MLOC_60513	tyrosine aminotransferase 3	GO:0003824, GO:0006520, GO:0008483, GO:0009058, GO:0030170	PF00155	IPR004839, IPR005958, IPR015421, IPR015422, IPR015424	up	up
HORVU7Hr1G082850	unknown	1,4-alpha-glucan-branching enzyme	GO:0003824, GO:0005975, GO:0043169	PF02806	IPR006048, IPR013780, IPR013781, IPR017853			up	up
HORVU7Hr1G082860	MLOC_52022	Ribonuclease 3-like protein 3	GO:0003723, GO:0004525, GO:0006396	PF00636	IPR000999				down
HORVU7Hr1G083530	MLOC_75711	GDSL esterase/lipase	GO:0016788	PF00657	IPR001087, IPR013830	down
HORVU7Hr1G084110	MLOC_58896	GDSL esterase/lipase	GO:0016788	PF00657	IPR001087, IPR013830		up
HORVU7Hr1G084230	MLOC_36919	Cytochrome P450 superfamily protein	GO:0005506, GO:0016705, GO:0020037, GO:0055114	PF00067	IPR001128, IPR002401	down
HORVU7Hr1G084830	MLOC_76304	Acyl-ACP thioesterase	GO:0006633, GO:0016790	PF01643, PF12590	IPR002864, IPR021113, IPR029069	up
HORVU7Hr1G085120	MLOC_63457	Aldehyde dehydrogenase family 2 member C4	GO:0008152, GO:0016491, GO:0016620, GO:0055114	PF00171	IPR015590, IPR016160, IPR016161, IPR016162, IPR016163, IPR029510			up	up
HORVU7Hr1G085450	MLOC_12634	Double-strand break repair protein MRE11	GO:0016787	PF00149	IPR004843, IPR029052	down	down	down	down
HORVU7Hr1G085650	MLOC_17301	receptor kinase 2	GO:0004672, GO:0005515, GO:0005524, GO:0006468	PF07714, PF13855	IPR000719, IPR001245, IPR001611, IPR011009, IPR013320, IPR032675	down	down
HORVU7Hr1G085660	MLOC_18906	unknown function	none	none	none	down	down	down	down
HORVU7Hr1G085680	unknown	ABC transporter ATP-binding protein NatA	GO:0005524, GO:0016887	PF00005, PF12698	IPR003439, IPR003593, IPR017871, IPR027417		down
HORVU7Hr1G085790	MLOC_44309	Leucine-rich receptor-like protein kinase family protein	GO:0004672, GO:0005515, GO:0005524, GO:0006468	PF00069, PF08263, PF13855	IPR000719, IPR001611, IPR002290, IPR003591, IPR008271, IPR011009, IPR013210, IPR013320, IPR017441, IPR032675	down	down
HORVU7Hr1G086250	unknown	undescribed protein	none	none	none			up
HORVU7Hr1G086340	unknown	undescribed protein	none	PF12734	IPR028144			up
HORVU7Hr1G087320	MLOC_20960	receptor kinase 2	GO:0004672, GO:0005524, GO:0006468	PF00069, PF00635	IPR000535, IPR000719, IPR002290, IPR008271, IPR008962, IPR011009, IPR013320, IPR017441		down
HORVU7Hr1G087800	MLOC_57785	beta glucosidase 40	GO:0004553, GO:0005975	PF00232	IPR001360, IPR013781, IPR017853, IPR018120	down
HORVU7Hr1G088730	MLOC_58901	Dentin sialophosphoprotein-like	none	none	none			up	up
[truncated: 90 more rows]

## Sheet: Supplementary Table S2
Supplementary Table S2. Pearson's correlation coefficients between microarrays. Genotypes: CamB and Mar (Maresi); Organs: L – leaves, R – roots; Treatments: c – control conditions, d – drought stress. Each combination of genotype, organ and treatment is represented by three biological replicates
	Cam_L_c_1	Cam_L_c_2	Cam_L_c_3	Cam_L_d_1	Cam_L_d_2	Cam_L_d_3	Cam_R_c_1	Cam_R_c_2	Cam_R_c_3	Cam_R_d_1	Cam_R_d_2	Cam_R_d_3	Mar_L_c_1	Mar_L_c_2	Mar_L_c_3	Mar_L_d_1	Mar_L_d_2	Mar_L_d_3	Mar_R_c_1	Mar_R_c_2	Mar_R_c_3	Mar_R_d_1	Mar_R_d_2	Mar_R_d_3
Cam_L_c_1	1	0.888	0.889	0.74	0.625	0.747	-0.351	-0.409	-0.597	-0.568	-0.563	-0.518	0.521	0.488	0.481	0.487	0.627	0.62	-0.529	-0.312	-0.695	-0.666	-0.594	-0.681
Cam_L_c_2	0.888	1	0.907	0.833	0.644	0.836	-0.443	-0.495	-0.67	-0.654	-0.646	-0.615	0.619	0.61	0.601	0.596	0.703	0.693	-0.651	-0.394	-0.764	-0.742	-0.701	-0.762
Cam_L_c_3	0.889	0.907	1	0.862	0.69	0.858	-0.482	-0.517	-0.679	-0.676	-0.668	-0.653	0.667	0.655	0.666	0.657	0.727	0.716	-0.707	-0.531	-0.768	-0.755	-0.749	-0.779
Cam_L_d_1	0.74	0.833	0.862	1	0.874	0.925	-0.512	-0.547	-0.692	-0.625	-0.61	-0.59	0.578	0.546	0.56	0.698	0.762	0.758	-0.73	-0.545	-0.788	-0.705	-0.689	-0.721
Cam_L_d_2	0.625	0.644	0.69	0.874	1	0.857	-0.622	-0.642	-0.616	-0.565	-0.474	-0.563	0.583	0.57	0.588	0.693	0.665	0.668	-0.762	-0.622	-0.737	-0.666	-0.677	-0.67
Cam_L_d_3	0.747	0.836	0.858	0.925	0.857	1	-0.485	-0.529	-0.687	-0.621	-0.606	-0.578	0.571	0.538	0.551	0.677	0.769	0.765	-0.705	-0.523	-0.788	-0.701	-0.682	-0.724
Cam_R_c_1	-0.351	-0.443	-0.482	-0.512	-0.622	-0.485	1	0.922	0.822	0.66	0.6	0.688	-0.684	-0.675	-0.689	-0.73	-0.668	-0.666	0.724	0.59	0.606	0.468	0.496	0.463
Cam_R_c_2	-0.409	-0.495	-0.517	-0.547	-0.642	-0.529	0.922	1	0.832	0.691	0.626	0.706	-0.705	-0.696	-0.708	-0.747	-0.709	-0.706	0.738	0.579	0.641	0.504	0.512	0.5
Cam_R_c_3	-0.597	-0.67	-0.679	-0.692	-0.616	-0.687	0.822	0.832	1	0.815	0.773	0.775	-0.715	-0.7	-0.709	-0.774	-0.803	-0.796	0.73	0.524	0.758	0.605	0.596	0.624
Cam_R_d_1	-0.568	-0.654	-0.676	-0.625	-0.565	-0.621	0.66	0.691	0.815	1	0.888	0.907	-0.74	-0.736	-0.742	-0.747	-0.767	-0.758	0.618	0.453	0.652	0.733	0.744	0.742
Cam_R_d_2	-0.563	-0.646	-0.668	-0.61	-0.474	-0.606	0.6	0.626	0.773	0.888	1	0.873	-0.706	-0.702	-0.708	-0.705	-0.738	-0.726	0.577	0.421	0.619	0.703	0.713	0.72
Cam_R_d_3	-0.518	-0.615	-0.653	-0.59	-0.563	-0.578	0.688	0.706	0.775	0.907	0.873	1	-0.756	-0.748	-0.761	-0.741	-0.737	-0.726	0.62	0.475	0.61	0.735	0.764	0.732
Mar_L_c_1	0.521	0.619	0.667	0.578	0.583	0.571	-0.684	-0.705	-0.715	-0.74	-0.706	-0.756	1	0.89	0.894	0.791	0.784	0.776	-0.626	-0.514	-0.614	-0.629	-0.639	-0.624
Mar_L_c_2	0.488	0.61	0.655	0.546	0.57	0.538	-0.675	-0.696	-0.7	-0.736	-0.702	-0.748	0.89	1	0.912	0.781	0.752	0.737	-0.628	-0.509	-0.583	-0.606	-0.632	-0.613
Mar_L_c_3	0.481	0.601	0.666	0.56	0.588	0.551	-0.689	-0.708	-0.709	-0.742	-0.708	-0.761	0.894	0.912	1	0.814	0.768	0.757	-0.646	-0.534	-0.59	-0.606	-0.646	-0.619
Mar_L_d_1	0.487	0.596	0.657	0.698	0.693	0.677	-0.73	-0.747	-0.774	-0.747	-0.705	-0.741	0.791	0.781	0.814	1	0.88	0.878	-0.69	-0.565	-0.656	-0.603	-0.631	-0.608
Mar_L_d_2	0.627	0.703	0.727	0.762	0.665	0.769	-0.668	-0.709	-0.803	-0.767	-0.738	-0.737	0.784	0.752	0.768	0.88	1	0.939	-0.655	-0.487	-0.711	-0.651	-0.641	-0.666
Mar_L_d_3	0.62	0.693	0.716	0.758	0.668	0.765	-0.666	-0.706	-0.796	-0.758	-0.726	-0.726	0.776	0.737	0.757	0.878	0.939	1	-0.65	-0.486	-0.708	-0.647	-0.632	-0.661
Mar_R_c_1	-0.529	-0.651	-0.707	-0.73	-0.762	-0.705	0.724	0.738	0.73	0.618	0.577	0.62	-0.626	-0.628	-0.646	-0.69	-0.655	-0.65	1	0.857	0.833	0.683	0.731	0.703
Mar_R_c_2	-0.312	-0.394	-0.531	-0.545	-0.622	-0.523	0.59	0.579	0.524	0.453	0.421	0.475	-0.514	-0.509	-0.534	-0.565	-0.487	-0.486	0.857	1	0.751	0.487	0.563	0.506
Mar_R_c_3	-0.695	-0.764	-0.768	-0.788	-0.737	-0.788	0.606	0.641	0.758	0.652	0.619	0.61	-0.614	-0.583	-0.59	-0.656	-0.711	-0.708	0.833	0.751	1	0.768	0.742	0.789
Mar_R_d_1	-0.666	-0.742	-0.755	-0.705	-0.666	-0.701	0.468	0.504	0.605	0.733	0.703	0.735	-0.629	-0.606	-0.606	-0.603	-0.651	-0.647	0.683	0.487	0.768	1	0.899	0.915
Mar_R_d_2	-0.594	-0.701	-0.749	-0.689	-0.677	-0.682	0.496	0.512	0.596	0.744	0.713	0.764	-0.639	-0.632	-0.646	-0.631	-0.641	-0.632	0.731	0.563	0.742	0.899	1	0.902
Mar_R_d_3	-0.681	-0.762	-0.779	-0.721	-0.67	-0.724	0.463	0.5	0.624	0.742	0.72	0.732	-0.624	-0.613	-0.619	-0.608	-0.666	-0.661	0.703	0.506	0.789	0.915	0.902	1

## Sheet: Supplementary Table S3
Supplementary Table S3. The list all of differentially expressed genes in roots and leaves of CamB and Maresi genotypes under mild drought treatment that were successfully assigned to KEGG orthology groups. KEGG identifier and definition is provided according to KEGG database. Wherever available, the data set includes KEGG metabolic pathways IDs and description. Considering that a particular fact…
Gene_ID (HORVU)	KEGG identifier	KEGG definition	Expression change				KEGG pathways - number and description
			CamB roots	Mar roots	CamB leaves	Mar leaves	Path 1	Path 2	Path 3	Path 4	Path 5	Path 6	Path 7	Path 8	Path 9	Path 10	Path 11	Path 12
AGP50745	K03043	rpoB; DNA-directed RNA polymerase subunit beta [EC:2.7.7.6]				up	03020 RNA polymerase
AGP50747	K03046	rpoC; DNA-directed RNA polymerase subunit beta' [EC:2.7.7.6]			up		03020 RNA polymerase
HORVU0Hr1G001490	K02695	psaH; photosystem I subunit VI	up	up			00195 Photosynthesis
HORVU0Hr1G003020	K09264	MADS-box transcription factor		down
HORVU0Hr1G003270	K08901	psbQ; photosystem II oxygen-evolving enhancer protein 3	up	up			00195 Photosynthesis
HORVU0Hr1G005160	K01620	ltaE; threonine aldolase [EC:4.1.2.48]			up	up	01230 Biosynthesis of amino acids	00260 Glycine, serine and threonine metabolism
HORVU0Hr1G007340	K22419	VEP1; Delta4-3-oxosteroid 5beta-reductase [EC:1.3.1.3]	up	up	up	up
HORVU0Hr1G007430	K13449	PR1; pathogenesis-related protein 1	down	down			04016 MAPK signaling pathway - plant	04075 Plant hormone signal transduction	04626 Plant-pathogen interaction
HORVU0Hr1G008950	K00826	E2.6.1.42; branched-chain amino acid aminotransferase [EC:2.6.1.42]	up	up	up	up	01210 2-Oxocarboxylic acid metabolism	01230 Biosynthesis of amino acids	00270 Cysteine and methionine metabolism	00280 Valine, leucine and isoleucine degradation	00290 Valine, leucine and isoleucine biosynthesis	00770 Pantothenate and CoA biosynthesis	00966 Glucosinolate biosynthesis
HORVU0Hr1G013850	K00234	SDHA; succinate dehydrogenase (ubiquinone) flavoprotein subunit [EC:1.3.5.1]	up				01200 Carbon metabolism	00020 Citrate cycle	00190 Oxidative phosphorylation	04714 Thermogenesis
HORVU0Hr1G013900	K11517	HAO; (S)-2-hydroxy-acid oxidase [EC:1.1.3.15]	up				01200 Carbon metabolism	00630 Glyoxylate and dicarboxylate metabolism	04146 Peroxisome
HORVU0Hr1G013950	K09060	GBF; plant G-box-binding factor	up	up
HORVU0Hr1G017230	K01166	RNASET2; ribonuclease T2 [EC:4.6.1.19]	up	up
HORVU0Hr1G018190	K01904	4CL; 4-coumarate--CoA ligase [EC:6.2.1.12]	up	up	up		00130 Ubiquinone and other terpenoid-quinone biosynthesis	00940 Phenylpropanoid biosynthesis
HORVU0Hr1G021760	K04122	GA3; ent-kaurene oxidase [EC:1.14.14.86]	up	up			00904 Diterpenoid biosynthesis
HORVU0Hr1G023540	K01087	otsB; trehalose 6-phosphate phosphatase [EC:3.1.3.12]	down				00500 Starch and sucrose metabolism
HORVU0Hr1G038430	K15397	KCS; 3-ketoacyl-CoA synthase [EC:2.3.1.199]	down	down	up	up	00062 Fatty acid elongation	04626 Plant-pathogen interaction
HORVU0Hr1G040200	K18010	HCAR; 7-hydroxymethyl chlorophyll a reductase [EC:1.17.7.2]	down				00860 Porphyrin and chlorophyll metabolism
HORVU1Hr1G000520	K10638	UHRF1; E3 ubiquitin-protein ligase UHRF1 [EC:2.3.2.27]				down
HORVU1Hr1G000660	K01633	folB; 7,8-dihydroneopterin aldolase/epimerase/oxygenase [EC:4.1.2.25 5.1.99.8 1.13.11.81]		down			00790 Folate biosynthesis
HORVU1Hr1G001960	K05894	OPR; 12-oxophytodienoic acid reductase [EC:1.3.1.42]	down				00592 alpha-Linolenic acid metabolism
HORVU1Hr1G002090	K01583	E4.1.1.19; arginine decarboxylase [EC:4.1.1.19]	up	up	up	up	00330 Arginine and proline metabolism
HORVU1Hr1G006860	K01810	GPI; glucose-6-phosphate isomerase [EC:5.3.1.9]	down				01200 Carbon metabolism	00010 Glycolysis / Gluconeogenesis	00030 Pentose phosphate pathway	00500 Starch and sucrose metabolism	00520 Amino sugar and nucleotide sugar metabolism
HORVU1Hr1G010020	K05350	bglB; beta-glucosidase [EC:3.2.1.21]	down				00500 Starch and sucrose metabolism	00460 Cyanoamino acid metabolism	00940 Phenylpropanoid biosynthesis
HORVU1Hr1G011930	K13066	E2.1.1.68; caffeic acid 3-O-methyltransferase [EC:2.1.1.68]	up	up			00940 Phenylpropanoid biosynthesis
HORVU1Hr1G013820	K00253	IVD; isovaleryl-CoA dehydrogenase [EC:1.3.8.4]	up		up		00280 Valine, leucine and isoleucine degradation
HORVU1Hr1G014570	K05857	PLCD; phosphatidylinositol phospholipase C, delta [EC:3.1.4.11]	up	up			00562 Inositol phosphate metabolism	04020 Calcium signaling pathway	04070 Phosphatidylinositol signaling system
HORVU1Hr1G015060	K09510	DNAJB4; DnaJ homolog subfamily B member 4			up
HORVU1Hr1G017770	K14484	IAA; auxin-responsive protein IAA	down	down			04075 Plant hormone signal transduction
HORVU1Hr1G021140	K00799	GST; glutathione S-transferase [EC:2.5.1.18]	down				00480 Glutathione metabolism	00980 Metabolism of xenobiotics by cytochrome P450	00982 Drug metabolism - cytochrome P450	00983 Drug metabolism - other enzymes
HORVU1Hr1G022660	K00345	ndhS; NAD(P)H-quinone oxidoreductase subunit S, chloroplastic [EC:1.6.5.-]	up	up
HORVU1Hr1G023460	K04125	E1.14.11.13; gibberellin 2beta-dioxygenase [EC:1.14.11.13]	down	down			00904 Diterpenoid biosynthesis
HORVU1Hr1G024870	K01126	E3.1.4.46; glycerophosphoryl diester phosphodiesterase [EC:3.1.4.46]			down	down	00564 Glycerophospholipid metabolism
HORVU1Hr1G028200	K00844	HK; hexokinase [EC:2.7.1.1]				down	01200 Carbon metabolism	00010 Glycolysis / Gluconeogenesis	00051 Fructose and mannose metabolism	00052 Galactose metabolism	00500 Starch and sucrose metabolism	00520 Amino sugar and nucleotide sugar metabolism	04066 HIF-1 signaling pathway
HORVU1Hr1G030190	K08790	STK38; serine/threonine kinase 38 [EC:2.7.11.1]			up
HORVU1Hr1G030740	K11446	KDM5; [histone H3]-trimethyl-L-lysine4 demethylase [EC:1.14.11.67]			down
HORVU1Hr1G035720	K01602	rbcS; ribulose-bisphosphate carboxylase small chain [EC:4.1.1.39]	up	up			01200 Carbon metabolism	00630 Glyoxylate and dicarboxylate metabolism	00710 Carbon fixation in photosynthetic organisms
HORVU1Hr1G038330	K07513	ACAA1; acetyl-CoA acyltransferase 1 [EC:2.3.1.16]	down				01212 Fatty acid metabolism	00071 Fatty acid degradation	00592 alpha-Linolenic acid metabolism	01040 Biosynthesis of unsaturated fatty acids	00280 Valine, leucine and isoleucine degradation	04146 Peroxisome
HORVU1Hr1G039250	K10999	CESA; cellulose synthase A [EC:2.4.1.12]	down	down
HORVU1Hr1G039830	K15404	CER1; aldehyde decarbonylase [EC:4.1.99.5]			up	up	00073 Cutin, suberine and wax biosynthesis
HORVU1Hr1G040700	K08869	ADCK; aarF domain-containing kinase		down
HORVU1Hr1G043830	K07407	E3.2.1.22B; alpha-galactosidase [EC:3.2.1.22]	up	up			00052 Galactose metabolism	00561 Glycerolipid metabolism	00600 Sphingolipid metabolism	00603 Glycosphingolipid biosynthesis - globo and isoglobo series
HORVU1Hr1G043890	K09873	TIP; aquaporin TIP	up	up
HORVU1Hr1G045700	K19861	BEBT; benzyl alcohol O-benzoyltransferase [EC:2.3.1.196 2.3.1.232]	down	down	down	down
HORVU1Hr1G049810	K19828	MTG1; mitochondrial GTPase 1	up	up
HORVU1Hr1G051150	K00968	PCYT1; choline-phosphate cytidylyltransferase [EC:2.7.7.15]		up			00564 Glycerophospholipid metabolism	00440 Phosphonate and phosphinate metabolism
HORVU1Hr1G051450	K20989	DUR3; urea-proton symporter	down
HORVU1Hr1G052430	K20547	CHIB; basic endochitinase B [EC:3.2.1.14]	down	down		down	00520 Amino sugar and nucleotide sugar metabolism	04016 MAPK signaling pathway - plant
HORVU1Hr1G053440	K00318	PRODH; proline dehydrogenase [EC:1.5.5.2]	down	down	down		00330 Arginine and proline metabolism
HORVU1Hr1G055000	K19525	VPS13A_C; vacuolar protein sorting-associated protein 13A/C	up	up
HORVU1Hr1G055510	K02214	CDC7; cell division control protein 7 [EC:2.7.11.1]			up		04110 Cell cycle	04111 Cell cycle - yeast	04113 Meiosis - yeast
HORVU1Hr1G055930	K09338	HD-ZIP; homeobox-leucine zipper protein	up	up
HORVU1Hr1G056560	K00858	ppnK; NAD+ kinase [EC:2.7.1.23]	up	up	up		00760 Nicotinate and nicotinamide metabolism
HORVU1Hr1G056630	K06118	SQD1; UDP-sulfoquinovose synthase [EC:3.13.1.1]				up	00520 Amino sugar and nucleotide sugar metabolism	00561 Glycerolipid metabolism
HORVU1Hr1G057940	K00901	dgkA; diacylglycerol kinase (ATP) [EC:2.7.1.107]	up	up			00561 Glycerolipid metabolism	00564 Glycerophospholipid metabolism	04070 Phosphatidylinositol signaling system	04072 Phospholipase D signaling pathway
HORVU1Hr1G062190	K06670	SCC1; cohesin complex subunit SCC1			up		04110 Cell cycle	04111 Cell cycle - yeast
HORVU1Hr1G062270	K10406	KIFC2_3; kinesin family member C2/C3				down
HORVU1Hr1G063560	K01535	PMA1; H+-transporting ATPase [EC:7.1.2.1]		down			00190 Oxidative phosphorylation
HORVU1Hr1G065100	K15382	SLC50A; solute carrier family 50 (sugar transporter)	up	up
HORVU1Hr1G066830	K08741	MSH5; DNA mismatch repair protein MSH5		down
HORVU1Hr1G067140	K06675	SMC4; structural maintenance of chromosome 4			down		04111 Cell cycle - yeast
HORVU1Hr1G067300	K00927	PGK; phosphoglycerate kinase [EC:2.7.2.3]			up		01200 Carbon metabolism	01230 Biosynthesis of amino acids	00010 Glycolysis / Gluconeogenesis	00710 Carbon fixation in photosynthetic organisms	04066 HIF-1 signaling pathway
HORVU1Hr1G068020	K12355	REF1; coniferyl-aldehyde dehydrogenase [EC:1.2.1.68]	down		down		00940 Phenylpropanoid biosynthesis
HORVU1Hr1G069550	K03671	trxA; thioredoxin 1			down	up
HORVU1Hr1G070220	K00827	AGXT2; alanine-glyoxylate transaminase / (R)-3-amino-2-methylpropionate-pyruvate transaminase [EC:2.6.1.44 2.6.1.40]	up		up	up	00250 Alanine, aspartate and glutamate metabolism	00260 Glycine, serine and threonine metabolism	00270 Cysteine and methionine metabolism	00280 Valine, leucine and isoleucine degradation
HORVU1Hr1G070310	K00002	AKR1A1; alcohol dehydrogenase (NADP+) [EC:1.1.1.2]	up	up	up		01220 Degradation of aromatic compounds	00010 Glycolysis / Gluconeogenesis	00040 Pentose and glucuronate interconversions	00561 Glycerolipid metabolism	00930 Caprolactam degradation
HORVU1Hr1G070360	K20359	RABAC1; PRA1 family protein 1				down
HORVU1Hr1G071620	K08065	NFYB; nuclear transcription Y subunit beta	up
HORVU1Hr1G072180	K14652	ribBA; 3,4-dihydroxy 2-butanone 4-phosphate synthase / GTP cyclohydrolase II [EC:4.1.99.12 3.5.4.25]			up		00740 Riboflavin metabolism	00790 Folate biosynthesis
HORVU1Hr1G072470	K05909	E1.10.3.2; laccase [EC:1.10.3.2]	down		down	down
HORVU1Hr1G072590	K13508	GPAT; glycerol-3-phosphate acyltransferase [EC:2.3.1.15 2.3.1.198]			up	up	00561 Glycerolipid metabolism	00564 Glycerophospholipid metabolism
HORVU1Hr1G073840	K03531	ftsZ; cell division protein FtsZ		down	down		04112 Cell cycle - Caulobacter
HORVU1Hr1G074060	K08857	NEK1_4_5; NIMA (never in mitosis gene a)-related kinase 1/4/5 [EC:2.7.11.1]			down
HORVU1Hr1G075160	K23050	PCBER1; phenylcoumaran benzylic ether reductase [EC:1.3.1.-]		down	down
HORVU1Hr1G075760	K00430	E1.11.1.7; peroxidase [EC:1.11.1.7]	down				00940 Phenylpropanoid biosynthesis
HORVU1Hr1G075860	K01051	E3.1.1.11; pectinesterase [EC:3.1.1.11]	down	down			00040 Pentose and glucuronate interconversions	02020 Two-component system
HORVU1Hr1G076190	K03695	clpB; ATP-dependent Clp protease ATP-binding subunit ClpB	up	up	up	up
HORVU1Hr1G076650	K16040	ROMT; trans-resveratrol di-O-methyltransferase [EC:2.1.1.240]	down	down			00945 Stilbenoid, diarylheptanoid and gingerol biosynthesis
HORVU1Hr1G077820	K10798	PARP; poly [ADP-ribose] polymerase [EC:2.4.2.30]	up	up			03410 Base excision repair	04210 Apoptosis	04214 Apoptosis - fly	04217 Necroptosis
HORVU1Hr1G078480	K11252	H2B; histone H2B	up
HORVU1Hr1G078710	K20716	MAPKKK17_18; mitogen-activated protein kinase kinase kinase 17/18			up	up	04016 MAPK signaling pathway - plant
HORVU1Hr1G079150	K01115	PLD1_2; phospholipase D1/2 [EC:3.1.4.4]		down	down	down	00564 Glycerophospholipid metabolism	00565 Ether lipid metabolism	04014 Ras signaling pathway	04072 Phospholipase D signaling pathway	04071 Sphingolipid signaling pathway	04024 cAMP signaling pathway	04144 Endocytosis
HORVU1Hr1G080160	K08818	CDC2L; cell division cycle 2-like [EC:2.7.11.22]				up
HORVU1Hr1G082670	K09287	RAV; RAV-like factor	down	down		down
HORVU1Hr1G083130	K01711	gmd; GDPmannose 4,6-dehydratase [EC:4.2.1.47]	down	down			00051 Fructose and mannose metabolism	00520 Amino sugar and nucleotide sugar metabolism
HORVU1Hr1G083710	K14753	RACK1; guanine nucleotide-binding protein subunit beta-2-like 1 protein		down	down
HORVU1Hr1G084560	K08081	TR1; tropinone reductase I [EC:1.1.1.206]	down	down			00960 Tropane, piperidine and pyridine alkaloid biosynthesis
HORVU1Hr1G085170	K02921	RP-L37Ae; large subunit ribosomal protein L37Ae	up				03010 Ribosome
HORVU1Hr1G086450	K06911	uncharacterized protein			down
HORVU1Hr1G088270	K00020	mmsB; 3-hydroxyisobutyrate dehydrogenase [EC:1.1.1.31]				up	00280 Valine, leucine and isoleucine degradation
HORVU1Hr1G089680	K08145	SLC2A8; MFS transporter, SP family, solute carrier family 2 (facilitated glucose transporter), member 8	down
HORVU1Hr1G089730	K22068	ISCU; iron-sulfur cluster assembly enzyme ISCU, mitochondrial	up	up	up	up
HORVU1Hr1G090490	K00053	ilvC; ketol-acid reductoisomerase [EC:1.1.1.86]			up		01210 2-Oxocarboxylic acid metabolism	01230 Biosynthesis of amino acids	00290 Valine, leucine and isoleucine biosynthesis	00770 Pantothenate and CoA biosynthesis
HORVU1Hr1G091600	K00975	glgC; glucose-1-phosphate adenylyltransferase [EC:2.7.7.27]			up		00500 Starch and sucrose metabolism	00520 Amino sugar and nucleotide sugar metabolism	02026 Biofilm formation - Escherichia coli
HORVU1Hr1G092950	K14791	PWP1; periodic tryptophan protein 1				up
HORVU1Hr1G093180	K03093	sigI; RNA polymerase sigma factor	up	up
HORVU1Hr1G093490	K11644	SIN3A; paired amphipathic helix protein Sin3a			down		04139 Mitophagy - yeast
HORVU1Hr1G095430	K01784	galE; UDP-glucose 4-epimerase [EC:5.1.3.2]	up	up			00052 Galactose metabolism	00520 Amino sugar and nucleotide sugar metabolism
HORVU2Hr1G000280	K13034	ATCYSC1; L-3-cyanoalanine synthase/ cysteine synthase [EC:2.5.1.47 4.4.1.9]	down				01200 Carbon metabolism	01230 Biosynthesis of amino acids	00920 Sulfur metabolism	00270 Cysteine and methionine metabolism	00460 Cyanoamino acid metabolism
HORVU2Hr1G002930	K01728	pel; pectate lyase [EC:4.2.2.2]	down	down	down		00040 Pentose and glucuronate interconversions	02024 Quorum sensing
HORVU2Hr1G003470	K12153	CYP79A2; phenylalanine N-monooxygenase [EC:1.14.14.40]	up	up		up	01210 2-Oxocarboxylic acid metabolism	00460 Cyanoamino acid metabolism	00966 Glucosinolate biosynthesis
HORVU2Hr1G004620	K04120	E5.5.1.13; ent-copalyl diphosphate synthase [EC:5.5.1.13]	down		down		00904 Diterpenoid biosynthesis
HORVU2Hr1G007070	K00574	cfa; cyclopropane-fatty-acyl-phospholipid synthase [EC:2.1.1.79]		up
HORVU2Hr1G010990	K09872	PIP; aquaporin PIP	down
HORVU2Hr1G012630	K00688	PYG; glycogen phosphorylase [EC:2.4.1.1]	down				00500 Starch and sucrose metabolism	04217 Necroptosis	02026 Biofilm formation - Escherichia coli
HORVU2Hr1G012790	K00615	E2.2.1.1; transketolase [EC:2.2.1.1]	up	up			01200 Carbon metabolism	01230 Biosynthesis of amino acids	00030 Pentose phosphate pathway	00710 Carbon fixation in photosynthetic organisms	01051 Biosynthesis of ansamycins
HORVU2Hr1G013760	K08472	MLO; mlo protein	down	down
HORVU2Hr1G014240	K21568	PLR; pinoresinol/lariciresinol reductase [EC:1.23.1.1 1.23.1.2 1.23.1.3 1.23.1.4]		down	down		00998 Biosynthesis of various secondary metabolites - part 2
HORVU2Hr1G014590	K09419	HSFF; heat shock transcription factor, other eukaryote	up	up		up
HORVU2Hr1G015720	K18819	GOLS; inositol 3-alpha-galactosyltransferase [EC:2.4.1.123]	up	up			00052 Galactose metabolism
HORVU2Hr1G016800	K20474	RINT1; RAD50-interacting protein 1	up	up
HORVU2Hr1G017680	K15710	SHPRH; E3 ubiquitin-protein ligase SHPRH [EC:3.6.4.- 2.3.2.27]		down	up	up
HORVU2Hr1G018720	K00249	ACADM; acyl-CoA dehydrogenase [EC:1.3.8.7]				down	01212 Fatty acid metabolism	00071 Fatty acid degradation	00280 Valine, leucine and isoleucine degradation
HORVU2Hr1G019160	K02891	RP-L22e; large subunit ribosomal protein L22e	up				03010 Ribosome
HORVU2Hr1G019190	K03016	RPB8; DNA-directed RNA polymerases I, II, and III subunit RPABC3			up	up	03020 RNA polymerase
HORVU2Hr1G019270	K22048	MSL4S; mechanosensitive ion channel protein 4/5/6/7/8/9/10		down
HORVU2Hr1G019820	K02701	psaN; photosystem I subunit PsaN	up	up			00195 Photosynthesis
HORVU2Hr1G021110	K04565	SOD1; superoxide dismutase, Cu-Zn family [EC:1.15.1.1]	up				04146 Peroxisome
HORVU2Hr1G025140	K08874	TRRAP; transformation/transcription domain-associated protein	up
HORVU2Hr1G027680	K18551	SDT1; pyrimidine and pyridine-specific 5'-nucleotidase [EC:3.1.3.-]		up			00760 Nicotinate and nicotinamide metabolism
HORVU2Hr1G027760	K15121	SLC25A44; solute carrier family 25, member 44		up
HORVU2Hr1G028380	K13680	CSLA; beta-mannan synthase [EC:2.4.1.32]	up	up
HORVU2Hr1G030680	K13941	folKP; 2-amino-4-hydroxy-6-hydroxymethyldihydropteridine diphosphokinase / dihydropteroate synthase [EC:2.7.6.3 2.5.1.15]				down	00790 Folate biosynthesis
HORVU2Hr1G032970	K01057	PGLS; 6-phosphogluconolactonase [EC:3.1.1.31]		down			01200 Carbon metabolism	00030 Pentose phosphate pathway
HORVU2Hr1G035830	K15400	HHT1; omega-hydroxypalmitate O-feruloyl transferase [EC:2.3.1.188]				up	00073 Cutin, suberine and wax biosynthesis
HORVU2Hr1G036110	K00131	gapN; glyceraldehyde-3-phosphate dehydrogenase (NADP+) [EC:1.2.1.9]	up				01200 Carbon metabolism	00010 Glycolysis / Gluconeogenesis	00030 Pentose phosphate pathway
HORVU2Hr1G036960	K08908	LHCA2; light-harvesting complex I chlorophyll a/b binding protein 2	up	up			00196 Photosynthesis - antenna proteins
HORVU2Hr1G037550	K07374	TUBA; tubulin alpha	down	down			04145 Phagosome	04210 Apoptosis
HORVU2Hr1G038940	K03541	psbR; photosystem II 10kDa protein			down	down	00195 Photosynthesis
HORVU2Hr1G039510	K08906	petJ; cytochrome c6	up	up			00195 Photosynthesis
HORVU2Hr1G040780	K08914	LHCB3; light-harvesting complex II chlorophyll a/b binding protein 3	up				00196 Photosynthesis - antenna proteins
HORVU2Hr1G041300	K09422	MYBP; transcription factor MYB, plant	up	up		up
HORVU2Hr1G042350	K20924	CSLD; cellulose synthase-like protein [EC:2.4.1.-]		down
HORVU2Hr1G045340	K01637	E4.1.3.1; isocitrate lyase [EC:4.1.3.1]	down	down			01200 Carbon metabolism	00630 Glyoxylate and dicarboxylate metabolism
HORVU2Hr1G046740	K02115	ATPF1G; F-type H+-transporting ATPase subunit gamma	up	down	down	down	00190 Oxidative phosphorylation	00195 Photosynthesis
HORVU2Hr1G046740	K12951	ctpD; cobalt/nickel-transporting P-type ATPase D [EC:7.2.2.-]	up	down	down	down	00190 Oxidative phosphorylation	00195 Photosynthesis
HORVU2Hr1G050260	K14516	ERF1; ethylene-responsive transcription factor 1		up			04016 MAPK signaling pathway - plant	04075 Plant hormone signal transduction
HORVU2Hr1G053190	K08832	SRPK3; serine/threonine-protein kinase SRPK3 [EC:2.7.11.1]			down
HORVU2Hr1G053260	K11420	EHMT; [histone H3]-lysine9 N-trimethyltransferase EHMT [EC:2.1.1.355]			down		00310 Lysine degradation
HORVU2Hr1G056440	K01873	VARS; valyl-tRNA synthetase [EC:6.1.1.9]				up	00970 Aminoacyl-tRNA biosynthesis
HORVU2Hr1G056650	K00962	pnp; polyribonucleotide nucleotidyltransferase [EC:2.7.7.8]	up				03018 RNA degradation
HORVU2Hr1G057700	K02716	psbO; photosystem II oxygen-evolving enhancer protein 1	down	down			00195 Photosynthesis
HORVU2Hr1G061060	K15032	MTERFD; mTERF domain-containing protein, mitochondrial	up	up
HORVU2Hr1G063690	K03327	TC.MATE; multidrug resistance protein, MATE family	down	down
HORVU2Hr1G066820	K16296	SCPL-I; serine carboxypeptidase-like clade I [EC:3.4.16.-]	down
HORVU2Hr1G067750	K09571	FKBP4_5; FK506-binding protein 4/5 [EC:5.2.1.8]			up	up
HORVU2Hr1G068010	K00224	CEQORH; chloroplastic oxoene reductase [EC:1.3.1.-]	down				00592 alpha-Linolenic acid metabolism
HORVU2Hr1G068630	K13456	RIN4; RPM1-interacting protein 4	down	down		down	04626 Plant-pathogen interaction
HORVU2Hr1G070310	K22418	HSD1; 11beta/17beta-hydroxysteroid dehydrogenase [EC:1.1.1.146 1.1.1.-]	up	up	up	up
HORVU2Hr1G071960	K01895	ACSS1_2; acetyl-CoA synthetase [EC:6.2.1.1]	down				01200 Carbon metabolism	00010 Glycolysis / Gluconeogenesis	00620 Pyruvate metabolism	00630 Glyoxylate and dicarboxylate metabolism	00640 Propanoate metabolism	00720 Carbon fixation pathways in prokaryotes	00680 Methane metabolism
HORVU2Hr1G072500	K00700	GBE1; 1,4-alpha-glucan branching enzyme [EC:2.4.1.18]	up				00500 Starch and sucrose metabolism
HORVU2Hr1G073210	K01193	INV; beta-fructofuranosidase [EC:3.2.1.26]	up	up	up	up	00052 Galactose metabolism	00500 Starch and sucrose metabolism
HORVU2Hr1G073760	K03386	PRDX2_4; peroxiredoxin (alkyl hydroperoxide reductase subunit C) [EC:1.11.1.15]	up		up		04214 Apoptosis - fly
HORVU2Hr1G077230	K03354	APC7; anaphase-promoting complex subunit 7		up			04120 Ubiquitin mediated proteolysis	04140 Autophagy - animal	04110 Cell cycle	04111 Cell cycle - yeast	04113 Meiosis - yeast	04114 Oocyte meiosis
HORVU2Hr1G077230	K07874	RAB1A; Ras-related protein Rab-1A		up			04120 Ubiquitin mediated proteolysis	04140 Autophagy - animal	04110 Cell cycle	04111 Cell cycle - yeast	04113 Meiosis - yeast	04114 Oocyte meiosis
HORVU2Hr1G078570	K22374	DMAS1; 3''-deamino-3''-oxonicotianamine reductase [EC:1.1.1.285]	up		up	up
HORVU2Hr1G079920	K08917	LHCB6; light-harvesting complex II chlorophyll a/b binding protein 6		up			00196 Photosynthesis - antenna proteins
HORVU2Hr1G080970	K00130	betB; betaine-aldehyde dehydrogenase [EC:1.2.1.8]	up		up		00260 Glycine, serine and threonine metabolism
HORVU2Hr1G083100	K00573	E2.1.1.77; protein-L-isoaspartate(D-aspartate) O-methyltransferase [EC:2.1.1.77]	up	up			03460 Fanconi anemia pathway
HORVU2Hr1G083100	K15360	STRA13; centromere protein X	up	up			03460 Fanconi anemia pathway
HORVU2Hr1G083340	K15188	CCNT; cyclin T				down
HORVU2Hr1G084130	K01638	aceB; malate synthase [EC:2.3.3.9]	up	up			01200 Carbon metabolism	00620 Pyruvate metabolism	00630 Glyoxylate and dicarboxylate metabolism
HORVU2Hr1G086080	K00794	ribH; 6,7-dimethyl-8-ribityllumazine synthase [EC:2.5.1.78]	up			up	00740 Riboflavin metabolism
HORVU2Hr1G087970	K00031	IDH1; isocitrate dehydrogenase [EC:1.1.1.42]	up				01200 Carbon metabolism	01210 2-Oxocarboxylic acid metabolism	01230 Biosynthesis of amino acids	00020 Citrate cycle	00720 Carbon fixation pathways in prokaryotes	00480 Glutathione metabolism	04146 Peroxisome
HORVU2Hr1G087970	K03676	grxC; glutaredoxin 3	up				01200 Carbon metabolism	01210 2-Oxocarboxylic acid metabolism	01230 Biosynthesis of amino acids	00020 Citrate cycle	00720 Carbon fixation pathways in prokaryotes	00480 Glutathione metabolism	04146 Peroxisome
HORVU2Hr1G088540	K17991	PXG; peroxygenase [EC:1.11.2.3]	up				00073 Cutin, suberine and wax biosynthesis
HORVU2Hr1G089440	K10775	PAL; phenylalanine ammonia-lyase [EC:4.3.1.24]	down	down			00360 Phenylalanine metabolism	00940 Phenylpropanoid biosynthesis
HORVU2Hr1G089620	K22522	LOG; cytokinin riboside 5'-monophosphate phosphoribohydrolase [EC:3.2.2.-]	down	down	down	down
HORVU2Hr1G089950	K14664	ILR1; IAA-amino acid hydrolase [EC:3.5.1.-]		up
HORVU2Hr1G091460	K15095	E1.1.1.208; (+)-neomenthol dehydrogenase [EC:1.1.1.208]	down				00902 Monoterpenoid biosynthesis
HORVU2Hr1G092190	K09553	STIP1; stress-induced-phosphoprotein 1				up
HORVU2Hr1G092250	K11498	CENPE; centromeric protein E		down
HORVU2Hr1G094230	K20772	ACS1_2_6; 1-aminocyclopropane-1-carboxylate synthase 1/2/6 [EC:4.4.1.14]			up	up	00270 Cysteine and methionine metabolism	04016 MAPK signaling pathway - plant
HORVU2Hr1G094390	K11275	H1_5; histone H1/5				up
HORVU2Hr1G096890	K13495	CISZOG; cis-zeatin O-glucosyltransferase [EC:2.4.1.215]	down	down			00908 Zeatin biosynthesis
HORVU2Hr1G098880	K16871	POP2; 4-aminobutyrate---pyruvate transaminase [EC:2.6.1.96]	down	down			00650 Butanoate metabolism	00250 Alanine, aspartate and glutamate metabolism
HORVU2Hr1G099330	K14709	SLC39A1_2_3; solute carrier family 39 (zinc transporter), member 1/2/3	up	up
HORVU2Hr1G101040	K01537	ATP2C; P-type Ca2+ transporter type 2C [EC:7.2.2.10]	up	up
HORVU2Hr1G101670	K02152	ATPeV1G; V-type H+-transporting ATPase subunit G	up				00190 Oxidative phosphorylation	04150 mTOR signaling pathway	04145 Phagosome
HORVU2Hr1G106410	K00703	glgA; starch synthase [EC:2.4.1.21]	up	up			00500 Starch and sucrose metabolism	02026 Biofilm formation - Escherichia coli
HORVU2Hr1G108250	K08695	ANR; anthocyanidin reductase [EC:1.3.1.77]				up	00941 Flavonoid biosynthesis
HORVU2Hr1G108420	K08235	E2.4.1.207; xyloglucan:xyloglucosyl transferase [EC:2.4.1.207]	down	down
HORVU2Hr1G108520	K16223	FT; protein FLOWERING LOCUS T	up		up		04712 Circadian rhythm - plant
HORVU2Hr1G109990	K02154	ATPeV0A; V-type H+-transporting ATPase subunit a				down	00190 Oxidative phosphorylation	04145 Phagosome	04142 Lysosome
HORVU2Hr1G110120	K01251	E3.3.1.1; adenosylhomocysteinase [EC:3.3.1.1]	up		up		00270 Cysteine and methionine metabolism
HORVU2Hr1G110230	K14498	SNRK2; serine/threonine-protein kinase SRK2 [EC:2.7.11.1]	up	up	up	up	04016 MAPK signaling pathway - plant	04075 Plant hormone signal transduction
HORVU2Hr1G111540	K00787	FDPS; farnesyl diphosphate synthase [EC:2.5.1.1 2.5.1.10]	up				00900 Terpenoid backbone biosynthesis
HORVU2Hr1G113270	K13051	ASRGL1; L-asparaginase / beta-aspartyl-peptidase [EC:3.5.1.1 3.4.19.5]		down	up	up	00250 Alanine, aspartate and glutamate metabolism	00460 Cyanoamino acid metabolism
HORVU2Hr1G114380	K15289	SLC35F5; solute carrier family 35, member F5			down
HORVU2Hr1G116150	K12741	HNRNPA1_3; heterogeneous nuclear ribonucleoprotein A1/A3	up	up			03040 Spliceosome
HORVU2Hr1G116390	K00660	CHS; chalcone synthase [EC:2.3.1.74]	down	down			00941 Flavonoid biosynthesis	04712 Circadian rhythm - plant
HORVU2Hr1G118350	K04124	E1.14.11.15; gibberellin 3beta-dioxygenase [EC:1.14.11.15]				down	00904 Diterpenoid biosynthesis
HORVU2Hr1G118510	K07195	EXOC7; exocyst complex component 7	up
HORVU2Hr1G118740	K01466	allB; allantoinase [EC:3.5.2.5]	down	down	down		00230 Purine metabolism	03430 Mismatch repair
HORVU2Hr1G118740	K07456	mutS2; DNA mismatch repair protein MutS2	down	down	down		00230 Purine metabolism	03430 Mismatch repair
HORVU2Hr1G121050	K17839	PAO4; polyamine oxidase [EC:1.5.3.17 1.5.3.-]			down	down	00330 Arginine and proline metabolism	00410 beta-Alanine metabolism
HORVU2Hr1G122470	K06130	LYPLA2; lysophospholipase II [EC:3.1.1.5]				down	00564 Glycerophospholipid metabolism
HORVU2Hr1G123770	K22133	AAE3; oxalate---CoA ligase [EC:6.2.1.8]	up	up			00630 Glyoxylate and dicarboxylate metabolism
HORVU2Hr1G127070	K00921	PIKFYVE; 1-phosphatidylinositol-3-phosphate 5-kinase [EC:2.7.1.150]	up	up			00562 Inositol phosphate metabolism	04070 Phosphatidylinositol signaling system	04145 Phagosome	04810 Regulation of actin cytoskeleton
HORVU2Hr1G127250	K18213	PRORP; proteinaceous RNase P [EC:3.1.26.5]		up			00860 Porphyrin and chlorophyll metabolism	03013 RNA transport
HORVU2Hr1G127250	K22013	SGR; magnesium dechelatase [EC:4.99.1.10]		up			00860 Porphyrin and chlorophyll metabolism	03013 RNA transport
HORVU3Hr1G000400	K03868	RBX1; RING-box protein 1 [EC:2.3.2.32]	down				04141 Protein processing in endoplasmic reticulum	04120 Ubiquitin mediated proteolysis	03420 Nucleotide excision repair	04310 Wnt signaling pathway	04341 Hedgehog signaling pathway - fly	04350 TGF-beta signaling pathway	04066 HIF-1 signaling pathway	04110 Cell cycle	04111 Cell cycle - yeast	04114 Oocyte meiosis	04710 Circadian rhythm
HORVU3Hr1G001260	K15803	GERD; (-)-germacrene D synthase [EC:4.2.3.75]	up	up			00909 Sesquiterpenoid and triterpenoid biosynthesis
HORVU3Hr1G002040	K13356	FAR; alcohol-forming fatty acyl-CoA reductase [EC:1.2.1.84]	down	down			00073 Cutin, suberine and wax biosynthesis	04146 Peroxisome
HORVU3Hr1G003410	K01695	trpA; tryptophan synthase alpha chain [EC:4.2.1.20]	down				01230 Biosynthesis of amino acids	00260 Glycine, serine and threonine metabolism	00400 Phenylalanine, tyrosine and tryptophan biosynthesis
HORVU3Hr1G007280	K00227	SC5DL; Delta7-sterol 5-desaturase [EC:1.14.19.20]			down		00100 Steroid biosynthesis
HORVU3Hr1G007500	K13993	HSP20; HSP20 family protein	up	up	up	up	04141 Protein processing in endoplasmic reticulum
HORVU3Hr1G009210	K02699	psaL; photosystem I subunit XI	up				00195 Photosynthesis
HORVU3Hr1G009940	K11593	ELF2C; eukaryotic translation initiation factor 2C	down	down
HORVU3Hr1G009940	K20843	GALT2S; hydroxyproline O-galactosyltransferase 2/3/4/5/6 [EC:2.4.1.-]	down	down
HORVU3Hr1G012530	K10268	FBXL2_20; F-box and leucine-rich repeat protein 2/20				down
HORVU3Hr1G015060	K13151	SNUPN; snurportin-1	up				03013 RNA transport
HORVU3Hr1G016430	K06617	E2.4.1.82; raffinose synthase [EC:2.4.1.82]	up	up	up		00052 Galactose metabolism
HORVU3Hr1G018530	K19784	chrR; chromate reductase, NAD(P)H dehydrogenase (quinone)	down	down		down
HORVU3Hr1G018650	K01568	PDC; pyruvate decarboxylase [EC:4.1.1.1]	up	up	up		00010 Glycolysis / Gluconeogenesis
HORVU3Hr1G019790	K00029	E1.1.1.40; malate dehydrogenase (oxaloacetate-decarboxylating)(NADP+) [EC:1.1.1.40]	down				01200 Carbon metabolism	00620 Pyruvate metabolism	00710 Carbon fixation in photosynthetic organisms
HORVU3Hr1G019850	K00279	CKX; cytokinin dehydrogenase [EC:1.5.99.12]	down		down		00908 Zeatin biosynthesis
HORVU3Hr1G020300	K09272	SSRP1; structure-specific recognition protein 1				up
HORVU3Hr1G021080	K14156	CHK; choline/ethanolamine kinase [EC:2.7.1.32 2.7.1.82]	up				00564 Glycerophospholipid metabolism
HORVU3Hr1G023150	K21483	SAMT; salicylate 1-O-methyltransferase [EC:2.1.1.274]	down	down
HORVU3Hr1G023910	K15639	CYP734A1; PHYB activation tagged suppressor 1 [EC:1.14.-.-]	down	down			00905 Brassinosteroid biosynthesis
HORVU3Hr1G024170	K00326	E1.6.2.2; cytochrome-b5 reductase [EC:1.6.2.2]	up				00520 Amino sugar and nucleotide sugar metabolism
HORVU3Hr1G024590	K15283	SLC35E1; solute carrier family 35, member E1	down	down
HORVU3Hr1G027700	K03152	thiJ; protein deglycase [EC:3.5.1.124]		down
HORVU3Hr1G029470	K01179	E3.2.1.4; endoglucanase [EC:3.2.1.4]	down	down			00500 Starch and sucrose metabolism	02020 Two-component system
HORVU3Hr1G030340	K15119	SLC25A39_40; solute carrier family 25, member 39/40	up	up
HORVU3Hr1G030580	K10739	RFA2; replication factor A2	up				03030 DNA replication	03420 Nucleotide excision repair	03430 Mismatch repair	03440 Homologous recombination	03460 Fanconi anemia pathway
HORVU3Hr1G032420	K07466	RFA1; replication factor A1	up		up		03030 DNA replication	03420 Nucleotide excision repair	03430 Mismatch repair	03440 Homologous recombination	03460 Fanconi anemia pathway
HORVU3Hr1G032420	K11806	DCAF13; DDB1- and CUL4-associated factor 13	up		up		03030 DNA replication	03420 Nucleotide excision repair	03430 Mismatch repair	03440 Homologous recombination	03460 Fanconi anemia pathway
HORVU3Hr1G039790	K19034	PSRP5; 50S ribosomal protein 5				up
HORVU3Hr1G039930	K04035	E1.14.13.81; magnesium-protoporphyrin IX monomethyl ester (oxidative) cyclase [EC:1.14.13.81]			up		00860 Porphyrin and chlorophyll metabolism
HORVU3Hr1G041820	K13436	PTI1; pto-interacting protein 1 [EC:2.7.11.1]	down				04626 Plant-pathogen interaction
HORVU3Hr1G041850	K22733	NIPA; magnesium transporter			down
HORVU3Hr1G045480	K13832	aroDE; 3-dehydroquinate dehydratase / shikimate dehydrogenase [EC:4.2.1.10 1.1.1.25]	up				01230 Biosynthesis of amino acids	00400 Phenylalanine, tyrosine and tryptophan biosynthesis
HORVU3Hr1G050340	K14497	PP2C; protein phosphatase 2C [EC:3.1.3.16]	up	up	up	up	04016 MAPK signaling pathway - plant	04075 Plant hormone signal transduction
HORVU3Hr1G055870	K12349	ASAH2; neutral ceramidase [EC:3.5.1.23]				up	00600 Sphingolipid metabolism	04071 Sphingolipid signaling pathway
HORVU3Hr1G056960	K02303	cobA; uroporphyrin-III C-methyltransferase [EC:2.1.1.107]	down				00860 Porphyrin and chlorophyll metabolism
HORVU3Hr1G057270	K21444	PCBP3_4; poly(rC)-binding protein 3/4	up			up
HORVU3Hr1G059480	K01183	E3.2.1.14; chitinase [EC:3.2.1.14]	down	down			00520 Amino sugar and nucleotide sugar metabolism
HORVU3Hr1G064550	K12890	SFRS1; splicing factor, arginine/serine-rich 1	up	up		up	03040 Spliceosome
HORVU3Hr1G064680	K10956	SEC61A; protein transport protein SEC61 subunit alpha				down	03060 Protein export	04141 Protein processing in endoplasmic reticulum	04145 Phagosome
HORVU3Hr1G065260	K05658	ABCB1; ATP-binding cassette, subfamily B (MDR/TAP), member 1 [EC:7.6.2.2]	down	down			02010 ABC transporters
HORVU3Hr1G067110	K00281	GLDC; glycine dehydrogenase [EC:1.4.4.2]			up		01200 Carbon metabolism	00630 Glyoxylate and dicarboxylate metabolism	00260 Glycine, serine and threonine metabolism
HORVU3Hr1G068380	K13248	PHOSPHO2; pyridoxal phosphate phosphatase PHOSPHO2 [EC:3.1.3.74]	up				00750 Vitamin B6 metabolism
HORVU3Hr1G070490	K05759	PFN; profilin	down	down			04015 Rap1 signaling pathway	04013 MAPK signaling pathway - fly	04810 Regulation of actin cytoskeleton
HORVU3Hr1G070860	K11793	CRBN; cereblon	up	up	up	up
HORVU3Hr1G071530	K02871	RP-L13; large subunit ribosomal protein L13				up	03010 Ribosome
HORVU3Hr1G071570	K16055	TPS; trehalose 6-phosphate synthase/phosphatase [EC:2.4.1.15 3.1.3.12]	down				00500 Starch and sucrose metabolism
HORVU3Hr1G072910	K07767	KATNA1; katanin p60 ATPase-containing subunit A1 [EC:5.6.1.1]	up
HORVU3Hr1G073190	K10418	DYNLL; dynein light chain LC8-type	down
HORVU3Hr1G074250	K01455	E3.5.1.49; formamidase [EC:3.5.1.49]	down				01200 Carbon metabolism	00630 Glyoxylate and dicarboxylate metabolism	00910 Nitrogen metabolism	00460 Cyanoamino acid metabolism
HORVU3Hr1G074280	K01493	comEB; dCMP deaminase [EC:3.5.4.12]			up		00240 Pyrimidine metabolism
HORVU3Hr1G074640	K14508	NPR1; regulatory protein NPR1	down	down			04075 Plant hormone signal transduction
HORVU3Hr1G076480	K01408	IDE; insulysin [EC:3.4.24.56]			down
HORVU3Hr1G076910	K12184	VPS28; ESCRT-I complex subunit VPS28		down			04144 Endocytosis
HORVU3Hr1G076960	K15029	EIF3L; translation initiation factor 3 subunit L	up	up
HORVU3Hr1G077930	K17609	NXN; nucleoredoxin [EC:1.8.1.8]	up	up	up	up
HORVU3Hr1G080830	K00487	CYP73A; trans-cinnamate 4-monooxygenase [EC:1.14.14.91]			up		01220 Degradation of aromatic compounds	00130 Ubiquinone and other terpenoid-quinone biosynthesis	00940 Phenylpropanoid biosynthesis	00945 Stilbenoid, diarylheptanoid and gingerol biosynthesis	00941 Flavonoid biosynthesis
HORVU3Hr1G082730	K03542	psbS; photosystem II 22kDa protein	up				00195 Photosynthesis
HORVU3Hr1G083380	K10355	ACTF; actin, other eukaryote	down
HORVU3Hr1G083990	K14289	XPO5; exportin-5	up	up			03013 RNA transport
HORVU3Hr1G084450	K20624	CYP94C1; 12-hydroxyjasmonoyl-L-amino acid 12-hydroxylase / fatty acid hydroxylase [EC:1.14.14.49]	up	up
HORVU3Hr1G085760	K12657	ALDH18A1; delta-1-pyrroline-5-carboxylate synthetase [EC:2.7.2.11 1.2.1.41]	up	up	up	up	01230 Biosynthesis of amino acids	00330 Arginine and proline metabolism
HORVU3Hr1G086500	K03283	HSPA1s; heat shock 70kDa protein 1/2/6/8			up	up	03040 Spliceosome	04141 Protein processing in endoplasmic reticulum	04010 MAPK signaling pathway	04144 Endocytosis
HORVU3Hr1G087380	K02973	RP-S23e; small subunit ribosomal protein S23e	up		up		03010 Ribosome
HORVU3Hr1G087470	K16297	SCPL-II; serine carboxypeptidase-like clade II [EC:3.4.16.-]	up		up
HORVU3Hr1G091320	K03921	FAB2; acyl-[acyl-carrier-protein] desaturase [EC:1.14.19.2 1.14.19.11 1.14.19.26]		down			01212 Fatty acid metabolism	00061 Fatty acid biosynthesis	01040 Biosynthesis of unsaturated fatty acids
HORVU3Hr1G093350	K17285	SELENBP1; methanethiol oxidase [EC:1.8.3.4]	up	up	up		00920 Sulfur metabolism
HORVU3Hr1G093830	K00696	E2.4.1.14; sucrose-phosphate synthase [EC:2.4.1.14]		up		up	00500 Starch and sucrose metabolism
HORVU3Hr1G094260	K17065	DNM1L; dynamin 1-like protein [EC:3.6.5.5]			down		04668 TNF signaling pathway	04139 Mitophagy - yeast	04214 Apoptosis - fly	04217 Necroptosis
HORVU3Hr1G094820	K17525	CHID1; chitinase domain-containing protein 1			up
HORVU3Hr1G095700	K22684	MCA1; metacaspase-1 [EC:3.4.22.-]		down
HORVU3Hr1G096210	K20870	IRX10; putative beta-1,4-xylosyltransferase IRX10 [EC:2.4.2.-]	down
HORVU3Hr1G097140	K00083	CAD; cinnamyl-alcohol dehydrogenase [EC:1.1.1.195]	down				00940 Phenylpropanoid biosynthesis
HORVU3Hr1G107240	K21989	TMEM63; calcium permeable stress-gated cation channel	up	up	up
HORVU3Hr1G108540	K14492	ARR-A; two-component response regulator ARR-A family			down	down	04075 Plant hormone signal transduction
HORVU3Hr1G110850	K16280	RGLG; E3 ubiquitin-protein ligase RGLG [EC:2.3.2.27]	down	down
HORVU3Hr1G115580	K07025	putative hydrolase of the HAD superfamily	up
HORVU3Hr1G116490	K19882	NOTUM; O-palmitoleoyl-L-serine hydrolase [EC:3.1.1.98]	down	down			04310 Wnt signaling pathway
HORVU3Hr1G116580	K01507	ppa; inorganic pyrophosphatase [EC:3.6.1.1]	down	down			00190 Oxidative phosphorylation
HORVU4Hr1G000100	K08193	SLC17A; MFS transporter, ACS family, solute carrier family 17 (sodium-dependent inorganic phosphate cotransporter), other	up
HORVU4Hr1G000620	K06185	ABCF2; ATP-binding cassette, subfamily F, member 2	up	up
HORVU4Hr1G001350	K02865	RP-L10Ae; large subunit ribosomal protein L10Ae	up				03010 Ribosome
HORVU4Hr1G002240	K05389	KCNKF; potassium channel subfamily K, other eukaryote	up	up		up
HORVU4Hr1G004260	K22314	GGP; glucosinolate gamma-glutamyl hydrolase [EC:3.4.19.16]	up
HORVU4Hr1G005500	K04567	KARS; lysyl-tRNA synthetase, class II [EC:6.1.1.6]		down			00970 Aminoacyl-tRNA biosynthesis
HORVU4Hr1G005670	K08064	NFYA; nuclear transcription factor Y, alpha	up	up
HORVU4Hr1G005920	K15718	LOX1_5; linoleate 9S-lipoxygenase [EC:1.13.11.58]	down	down	up	up	00591 Linoleic acid metabolism
HORVU4Hr1G006730	K02952	RP-S13; small subunit ribosomal protein S13	up				03010 Ribosome
HORVU4Hr1G008440	K16732	PRC1; protein regulator of cytokinesis 1		down	down
HORVU4Hr1G008550	K01054	MGLL; acylglycerol lipase [EC:3.1.1.23]		up			00561 Glycerolipid metabolism	04714 Thermogenesis
HORVU4Hr1G010910	K14548	UTP4; U3 small nucleolar RNA-associated protein 4			down		03008 Ribosome biogenesis in eukaryotes
HORVU4Hr1G011510	K08873	SMG1; serine/threonine-protein kinase SMG1 [EC:2.7.11.1]		down			03015 mRNA surveillance pathway
HORVU4Hr1G016190	K02866	RP-L10e; large subunit ribosomal protein L10e		up			03010 Ribosome
HORVU4Hr1G016510	K23051	ndhT; NAD(P)H-quinone oxidoreductase subunit T, chloroplastic [EC:1.6.5.-]		down
HORVU4Hr1G017030	K14190	VTC2_5; GDP-L-galactose phosphorylase [EC:2.7.7.69]	down				00053 Ascorbate and aldarate metabolism
HORVU4Hr1G017450	K00128	ALDH; aldehyde dehydrogenase (NAD+) [EC:1.2.1.3]	down				00010 Glycolysis / Gluconeogenesis	00053 Ascorbate and aldarate metabolism	00620 Pyruvate metabolism	00071 Fatty acid degradation	00561 Glycerolipid metabolism	00280 Valine, leucine and isoleucine degradation	00310 Lysine degradation	00330 Arginine and proline metabolism	00340 Histidine metabolism	00380 Tryptophan metabolism	00410 beta-Alanine metabolism	00981 Insect hormone biosynthesis
HORVU4Hr1G019530	K13412	CPK; calcium-dependent protein kinase [EC:2.7.11.1]	down				04626 Plant-pathogen interaction
HORVU4Hr1G023490	K07760	CDK; cyclin-dependent kinase [EC:2.7.11.22]			up
HORVU4Hr1G024710	K04646	CLTC; clathrin heavy chain			down		04144 Endocytosis	04142 Lysosome
HORVU4Hr1G029760	K03665	hflX; GTPase		up
HORVU4Hr1G036280	K01739	metB; cystathionine gamma-synthase [EC:2.5.1.48]			up		01230 Biosynthesis of amino acids	00920 Sulfur metabolism	00270 Cysteine and methionine metabolism	00450 Selenocompound metabolism
HORVU4Hr1G044140	K03715	MGD; 1,2-diacylglycerol 3-beta-galactosyltransferase [EC:2.4.1.46]				up	00561 Glycerolipid metabolism
HORVU4Hr1G049500	K00695	E2.4.1.13; sucrose synthase [EC:2.4.1.13]	up	up			00500 Starch and sucrose metabolism
HORVU4Hr1G051010	K15633	gpmI; 2,3-bisphosphoglycerate-independent phosphoglycerate mutase [EC:5.4.2.12]	up	up	up	up	01200 Carbon metabolism	01230 Biosynthesis of amino acids	00010 Glycolysis / Gluconeogenesis	00680 Methane metabolism	00260 Glycine, serine and threonine metabolism
HORVU4Hr1G052170	K01209	abfA; alpha-L-arabinofuranosidase [EC:3.2.1.55]	down				00520 Amino sugar and nucleotide sugar metabolism
HORVU4Hr1G052170	K09875	SIP; aquaporin SIP	down				00520 Amino sugar and nucleotide sugar metabolism
HORVU4Hr1G052350	K00036	G6PD; glucose-6-phosphate 1-dehydrogenase [EC:1.1.1.49 1.1.1.363]			up		01200 Carbon metabolism	00030 Pentose phosphate pathway	00480 Glutathione metabolism
HORVU4Hr1G052890	K03949	NDUFA5; NADH dehydrogenase (ubiquinone) 1 alpha subcomplex subunit 5			up		00190 Oxidative phosphorylation	04714 Thermogenesis
HORVU4Hr1G054000	K11797	PHIP; PH-interacting protein	up
HORVU4Hr1G054210	K01913	AAE7; acetate/butyrate---CoA ligase [EC:6.2.1.1 6.2.1.2]			up		01200 Carbon metabolism	00010 Glycolysis / Gluconeogenesis	00620 Pyruvate metabolism	00630 Glyoxylate and dicarboxylate metabolism	00650 Butanoate metabolism
HORVU4Hr1G054910	K08238	XXT; xyloglucan 6-xylosyltransferase [EC:2.4.2.39]			up	up
HORVU4Hr1G055220	K14496	PYL; abscisic acid receptor PYR/PYL family	down	down	down	down	04016 MAPK signaling pathway - plant	04075 Plant hormone signal transduction
HORVU4Hr1G055800	K08059	IFI30; interferon, gamma-inducible protein 30	up
HORVU4Hr1G055910	K14293	KPNB1; importin subunit beta-1	down	down			03013 RNA transport
HORVU4Hr1G056210	K17506	PPM1L; protein phosphatase 1L [EC:3.1.3.16]			up	up
HORVU4Hr1G059120	K12450	RHM; UDP-glucose 4,6-dehydratase [EC:4.2.1.76]	up		up	up	00520 Amino sugar and nucleotide sugar metabolism
HORVU4Hr1G059130	K08678	UXS1; UDP-glucuronate decarboxylase [EC:4.1.1.35]	down				00520 Amino sugar and nucleotide sugar metabolism
HORVU4Hr1G060150	K09562	HSPBP1; hsp70-interacting protein				up	04141 Protein processing in endoplasmic reticulum
HORVU4Hr1G062440	K01610	E4.1.1.49; phosphoenolpyruvate carboxykinase (ATP) [EC:4.1.1.49]	up				01200 Carbon metabolism	00010 Glycolysis / Gluconeogenesis	00020 Citrate cycle	00620 Pyruvate metabolism	00710 Carbon fixation in photosynthetic organisms
HORVU4Hr1G063980	K19366	SPG20; spartin	up	up			04144 Endocytosis
HORVU4Hr1G064790	K01580	E4.1.1.15; glutamate decarboxylase [EC:4.1.1.15]	down	down	down	down	00650 Butanoate metabolism	00250 Alanine, aspartate and glutamate metabolism	00410 beta-Alanine metabolism	00430 Taurine and hypotaurine metabolism	02024 Quorum sensing
HORVU4Hr1G066090	K06129	LYPLA3; lysophospholipase III [EC:3.1.1.5]		down			00564 Glycerophospholipid metabolism	04152 AMPK signaling pathway	04142 Lysosome
HORVU4Hr1G066090	K07297	ADIPOR; adiponectin receptor		down			00564 Glycerophospholipid metabolism	04152 AMPK signaling pathway	04142 Lysosome
HORVU4Hr1G066480	K14491	ARR-B; two-component response regulator ARR-B family	down	down			04075 Plant hormone signal transduction
HORVU4Hr1G068760	K20867	GAUT12S; galacturonosyltransferase 12/13/14/15 [EC:2.4.1.-]			down
HORVU4Hr1G074620	K00276	AOC3; primary-amine oxidase [EC:1.4.3.21]	down	down			00260 Glycine, serine and threonine metabolism	00350 Tyrosine metabolism	00360 Phenylalanine metabolism	00410 beta-Alanine metabolism	00950 Isoquinoline alkaloid biosynthesis	00960 Tropane, piperidine and pyridine alkaloid biosynthesis
HORVU4Hr1G075710	K02930	RP-L4e; large subunit ribosomal protein L4e			up		03010 Ribosome
HORVU4Hr1G077510	K21398	SLC11A2; natural resistance-associated macrophage protein 2			up	up	04142 Lysosome	04216 Ferroptosis
HORVU4Hr1G078470	K00121	frmA; S-(hydroxymethyl)glutathione dehydrogenase / alcohol dehydrogenase [EC:1.1.1.284 1.1.1.1]	down	down			01200 Carbon metabolism	01220 Degradation of aromatic compounds	00010 Glycolysis / Gluconeogenesis	00680 Methane metabolism	00071 Fatty acid degradation	00350 Tyrosine metabolism	00830 Retinol metabolism	00625 Chloroalkane and chloroalkene degradation	00626 Naphthalene degradation	00980 Metabolism of xenobiotics by cytochrome P450	00982 Drug metabolism - cytochrome P450
HORVU4Hr1G079030	K20888	MUR3; xyloglucan galactosyltransferase MUR3 [EC:2.4.1.-]	up	up	up	up
HORVU4Hr1G080460	K15040	VDAC2; voltage-dependent anion channel protein 2	up	up		up	04020 Calcium signaling pathway	04022 cGMP-PKG signaling pathway	04216 Ferroptosis	04217 Necroptosis	04218 Cellular senescence
HORVU4Hr1G080780	K08242	E2.1.1.143; 24-methylenesterol C-methyltransferase [EC:2.1.1.143]			up		00100 Steroid biosynthesis
HORVU4Hr1G082040	K03781	katE; catalase [EC:1.11.1.6]	up	up			01200 Carbon metabolism	00630 Glyoxylate and dicarboxylate metabolism	00380 Tryptophan metabolism	04016 MAPK signaling pathway - plant	04011 MAPK signaling pathway - yeast	04068 FoxO signaling pathway	04146 Peroxisome
HORVU4Hr1G084390	K01177	E3.2.1.2; beta-amylase [EC:3.2.1.2]	up	up	up	up	00500 Starch and sucrose metabolism
HORVU4Hr1G084400	K00599	METTL6; methyltransferase-like protein 6 [EC:2.1.1.-]				down
HORVU4Hr1G084830	K02867	RP-L11; large subunit ribosomal protein L11				up	03010 Ribosome
HORVU4Hr1G085930	K15523	FN3KRP; protein-ribulosamine 3-kinase [EC:2.7.1.172]			down
HORVU4Hr1G086320	K01074	PPT; palmitoyl-protein thioesterase [EC:3.1.2.22]				down	01212 Fatty acid metabolism	00062 Fatty acid elongation	04142 Lysosome
HORVU4Hr1G087230	K14641	APY1_2; apyrase [EC:3.6.1.5]	down	down			00230 Purine metabolism	00240 Pyrimidine metabolism
HORVU4Hr1G087350	K08994	yneE; ion channel-forming bestrophin family protein	up	up
HORVU4Hr1G090810	K14423	SMO1; plant 4,4-dimethylsterol C-4alpha-methyl-monooxygenase [EC:1.14.18.10]			down		00100 Steroid biosynthesis
HORVU5Hr1G006900	K13863	SLC7A1; solute carrier family 7 (cationic amino acid transporter), member 1	down
HORVU5Hr1G009840	K17255	GDI1_2; Rab GDP dissociation inhibitor	down	down	down
HORVU5Hr1G010420	K05387	GRIP; glutamate receptor, ionotropic, plant	down	down
HORVU5Hr1G014730	K00814	GPT; alanine transaminase [EC:2.6.1.2]			up	up	01200 Carbon metabolism	01210 2-Oxocarboxylic acid metabolism	01230 Biosynthesis of amino acids	00710 Carbon fixation in photosynthetic organisms	00250 Alanine, aspartate and glutamate metabolism	00220 Arginine biosynthesis
HORVU5Hr1G026650	K11251	H2A; histone H2A			up	up	04217 Necroptosis
HORVU5Hr1G042230	K06910	PEBP1; phosphatidylethanolamine-binding protein		down	up	up
HORVU5Hr1G042740	K14964	ASH2; Set1/Ash2 histone methyltransferase complex subunit ASH2	down	down
HORVU5Hr1G043080	K03013	RPB5; DNA-directed RNA polymerases I, II, and III subunit RPABC1			down	down	03020 RNA polymerase
HORVU5Hr1G043200	K21407	APMAP; adipocyte plasma membrane-associated protein	down	down
HORVU5Hr1G045750	K05765	CFL; cofilin	up	up	up	up	04810 Regulation of actin cytoskeleton
HORVU5Hr1G045990	K00967	PCYT2; ethanolamine-phosphate cytidylyltransferase [EC:2.7.7.14]	up	up			00564 Glycerophospholipid metabolism	00440 Phosphonate and phosphinate metabolism
HORVU5Hr1G046480	K01859	E5.5.1.6; chalcone isomerase [EC:5.5.1.6]	down	down			00941 Flavonoid biosynthesis
HORVU5Hr1G048100	K01953	asnB; asparagine synthase (glutamine-hydrolysing) [EC:6.3.5.4]	up	up	up		01230 Biosynthesis of amino acids	00250 Alanine, aspartate and glutamate metabolism
HORVU5Hr1G051160	K18045	SIW14; tyrosine-protein phosphatase SIW14 [EC:3.1.3.48]	up			up
HORVU5Hr1G052240	K02966	RP-S19e; small subunit ribosomal protein S19e	up				03010 Ribosome
HORVU5Hr1G053010	K00208	fabI; enoyl-[acyl-carrier protein] reductase I [EC:1.3.1.9 1.3.1.10]			up	up	01212 Fatty acid metabolism	00061 Fatty acid biosynthesis	00780 Biotin metabolism
HORVU5Hr1G053950	K12524	thrA; bifunctional aspartokinase / homoserine dehydrogenase 1 [EC:2.7.2.4 1.1.1.3]			down	down	01230 Biosynthesis of amino acids	00260 Glycine, serine and threonine metabolism	00270 Cysteine and methionine metabolism	00300 Lysine biosynthesis
HORVU5Hr1G056390	K01792	E5.1.3.15; glucose-6-phosphate 1-epimerase [EC:5.1.3.15]	down				00010 Glycolysis / Gluconeogenesis
HORVU5Hr1G056780	K08506	SYP7; syntaxin of plants SYP7				down	04130 SNARE interactions in vesicular transport
HORVU5Hr1G057090	K18857	ADH1; alcohol dehydrogenase class-P [EC:1.1.1.1]	down	down	down	down	00010 Glycolysis / Gluconeogenesis	00071 Fatty acid degradation	00592 alpha-Linolenic acid metabolism	00350 Tyrosine metabolism
HORVU5Hr1G057590	K15403	ACE; fatty acid omega-hydroxy dehydrogenase [EC:1.1.-.-]	down	down	down		00073 Cutin, suberine and wax biosynthesis
HORVU5Hr1G058400	K07152	SCO1; protein SCO1				down
HORVU5Hr1G061930	K20623	CYP92A6; typhasterol/6-deoxotyphasterol 2alpha-hydroxylase		down		down	00905 Brassinosteroid biosynthesis
HORVU5Hr1G062090	K14085	ALDH7A1; aldehyde dehydrogenase family 7 member A1 [EC:1.2.1.31 1.2.1.8 1.2.1.3]			up		00010 Glycolysis / Gluconeogenesis	00053 Ascorbate and aldarate metabolism	00620 Pyruvate metabolism	00071 Fatty acid degradation	00561 Glycerolipid metabolism	00260 Glycine, serine and threonine metabolism	00280 Valine, leucine and isoleucine degradation	00310 Lysine degradation	00330 Arginine and proline metabolism	00340 Histidine metabolism	00380 Tryptophan metabolism	00410 beta-Alanine metabolism
HORVU5Hr1G065330	K09753	CCR; cinnamoyl-CoA reductase [EC:1.2.1.44]	down				00940 Phenylpropanoid biosynthesis
HORVU5Hr1G066280	K08910	LHCA4; light-harvesting complex I chlorophyll a/b binding protein 4	up				00196 Photosynthesis - antenna proteins
HORVU5Hr1G067200	K16281	RHA1; RING-H2 zinc finger protein RHA1	up	up
HORVU5Hr1G067490	K05933	E1.14.17.4; aminocyclopropanecarboxylate oxidase [EC:1.14.17.4]	down	down			00270 Cysteine and methionine metabolism
HORVU5Hr1G069050	K19893	GN5_6; glucan endo-1,3-beta-glucosidase 5/6 [EC:3.2.1.39]		down			00500 Starch and sucrose metabolism
HORVU5Hr1G069600	K01673	cynT; carbonic anhydrase [EC:4.2.1.1]				up	00910 Nitrogen metabolism
HORVU5Hr1G069620	K11855	USP36_42; ubiquitin carboxyl-terminal hydrolase 36/42 [EC:3.4.19.12]			down	down
HORVU5Hr1G070160	K01214	ISA; isoamylase [EC:3.2.1.68]		up			00500 Starch and sucrose metabolism
HORVU5Hr1G070810	K23280	RRT; rhamnogalacturonan I rhamnosyltransferase [EC:2.4.1.351]		down
HORVU5Hr1G071280	K16285	XERICO; RING/U-box domain-containing protein [EC:2.3.2.27]		up
HORVU5Hr1G071920	K08905	psaG; photosystem I subunit V	up	up			00195 Photosynthesis
HORVU5Hr1G074820	K00306	PIPOX; sarcosine oxidase / L-pipecolate oxidase [EC:1.5.3.1 1.5.3.7]	down				00260 Glycine, serine and threonine metabolism	00310 Lysine degradation	04146 Peroxisome
HORVU5Hr1G076780	K16675	ZDHHC9_14_18; palmitoyltransferase ZDHHC9/14/18 [EC:2.3.1.225]	down				04391 Hippo signaling pathway - fly
HORVU5Hr1G078060	K20535	MPK1_2; mitogen-activated protein kinase 1/2 [EC:2.7.11.24]	up	up	up		04016 MAPK signaling pathway - plant
HORVU5Hr1G078130	K22389	LCAT3; phospholipase A1 [EC:3.1.1.32]	up				00564 Glycerophospholipid metabolism	00592 alpha-Linolenic acid metabolism
HORVU5Hr1G078320	K15287	SLC35F1_2; solute carrier family 35, member F1/2	down
HORVU5Hr1G078630	K13447	RBOH; respiratory burst oxidase [EC:1.6.3.- 1.11.1.-]	down	down		up	04016 MAPK signaling pathway - plant	04626 Plant-pathogen interaction
HORVU5Hr1G081120	K15151	MED10; mediator of RNA polymerase II transcription subunit 10				up
HORVU5Hr1G082480	K19365	BSCL2; seipin		up
HORVU5Hr1G082810	K01373	CTSF; cathepsin F [EC:3.4.22.41]			down		04142 Lysosome	04210 Apoptosis	04626 Plant-pathogen interaction
HORVU5Hr1G082940	K12619	XRN2; 5'-3' exoribonuclease 2 [EC:3.1.13.-]		down			03008 Ribosome biogenesis in eukaryotes	03018 RNA degradation
HORVU5Hr1G085220	K17592	SACS; sacsin				down
HORVU5Hr1G086660	K00485	FMO; dimethylaniline monooxygenase (N-oxide forming) [EC:1.14.13.8]	up	up	up	up	00982 Drug metabolism - cytochrome P450
HORVU5Hr1G088130	K02291	crtB; 15-cis-phytoene synthase [EC:2.5.1.32]	up	up		up	00906 Carotenoid biosynthesis
HORVU5Hr1G088700	K17499	PPM1G; protein phosphatase 1G [EC:3.1.3.16]	up
HORVU5Hr1G092850	K09840	NCED; 9-cis-epoxycarotenoid dioxygenase [EC:1.13.11.51]	up	up	up	up	00906 Carotenoid biosynthesis
HORVU5Hr1G093260	K12191	CHMP2A; charged multivesicular body protein 2A			up		04144 Endocytosis	04217 Necroptosis
HORVU5Hr1G093980	K20181	VPS18; vacuolar protein sorting-associated protein 18			down	down	04138 Autophagy - yeast
HORVU5Hr1G094940	K00059	fabG; 3-oxoacyl-[acyl-carrier protein] reductase [EC:1.1.1.100]	down	down	down	down	01212 Fatty acid metabolism	00061 Fatty acid biosynthesis	00780 Biotin metabolism
HORVU5Hr1G098410	K10661	MARCH6; E3 ubiquitin-protein ligase MARCH6 [EC:2.3.2.27]	up				04141 Protein processing in endoplasmic reticulum
HORVU5Hr1G100140	K02694	psaF; photosystem I subunit III	up	up			00195 Photosynthesis
HORVU5Hr1G109260	K08912	LHCB1; light-harvesting complex II chlorophyll a/b binding protein 1	up				00196 Photosynthesis - antenna proteins
HORVU5Hr1G110960	K03137	TFIIE2; transcription initiation factor TFIIE subunit beta	up				03022 Basal transcription factors
HORVU5Hr1G111480	K02469	gyrA; DNA gyrase subunit A [EC:5.6.2.2]				up
HORVU5Hr1G112350	K03103	MINPP1; multiple inositol-polyphosphate phosphatase / 2,3-bisphosphoglycerate 3-phosphatase [EC:3.1.3.62 3.1.3.80]	up	up			00010 Glycolysis / Gluconeogenesis	00562 Inositol phosphate metabolism
HORVU5Hr1G114900	K08246	CPI1; cycloeucalenol cycloisomerase [EC:5.5.1.9]		down		down	00100 Steroid biosynthesis
HORVU5Hr1G114900	K20660	CYP709; cytochrome P450 family 709		down		down	00100 Steroid biosynthesis
HORVU5Hr1G115340	K02881	RP-L18; large subunit ribosomal protein L18				up	03010 Ribosome
HORVU5Hr1G118590	K03320	amt; ammonium transporter, Amt family			down	down
HORVU6Hr1G002390	K15777	DOPA; 4,5-DOPA dioxygenase extradiol [EC:1.13.11.-]		down	down		00965 Betalain biosynthesis
HORVU6Hr1G002400	K05280	CYP75B1; flavonoid 3'-monooxygenase [EC:1.14.14.82]	down	down			00941 Flavonoid biosynthesis	00944 Flavone and flavonol biosynthesis
HORVU6Hr1G003300	K10534	NR; nitrate reductase (NAD(P)H) [EC:1.7.1.1 1.7.1.2 1.7.1.3]	down				00910 Nitrogen metabolism
HORVU6Hr1G005350	K05286	PIGB; GPI mannosyltransferase 3 [EC:2.4.1.-]	down	down		down	00563 Glycosylphosphatidylinositol
HORVU6Hr1G005930	K02575	NRT; MFS transporter, NNP family, nitrate/nitrite transporter	up	up			00910 Nitrogen metabolism
HORVU6Hr1G006880	K16298	SCPL-IV; serine carboxypeptidase-like clade IV [EC:3.4.16.-]	down
HORVU6Hr1G009670	K09595	HM13; minor histocompatibility antigen H13 [EC:3.4.23.-]			down
HORVU6Hr1G011030	K11254	H4; histone H4		down	down
HORVU6Hr1G012170	K14175	NES1; (3S,6E)-nerolidol synthase [EC:4.2.3.48]			down		00909 Sesquiterpenoid and triterpenoid biosynthesis
HORVU6Hr1G012570	K01802	E5.2.1.8; peptidylprolyl isomerase [EC:5.2.1.8]	up		up
HORVU6Hr1G014450	K21889	TMBIM6; Bax inhibitor 1			down
HORVU6Hr1G017390	K02201	E2.7.7.3B; pantetheine-phosphate adenylyltransferase [EC:2.7.7.3]	down				00770 Pantothenate and CoA biosynthesis
HORVU6Hr1G017860	K00278	nadB; L-aspartate oxidase [EC:1.4.3.16]			down		00250 Alanine, aspartate and glutamate metabolism	00760 Nicotinate and nicotinamide metabolism
HORVU6Hr1G019300	K01698	hemB; porphobilinogen synthase [EC:4.2.1.24]				up	00860 Porphyrin and chlorophyll metabolism
HORVU6Hr1G020570	K14777	DDX47; ATP-dependent RNA helicase DDX47/RRP3 [EC:3.6.4.13]				down
HORVU6Hr1G020720	K22390	ACP7; acid phosphatase type 7	down
HORVU6Hr1G025730	K18980	EO; 2-methylene-furan-3-one reductase [EC:1.3.1.105]		up
HORVU6Hr1G027620	K07375	TUBB; tubulin beta	down				04145 Phagosome
HORVU6Hr1G027650	K00457	HPD; 4-hydroxyphenylpyruvate dioxygenase [EC:1.13.11.27]		up			00350 Tyrosine metabolism	00360 Phenylalanine metabolism	00130 Ubiquinone and other terpenoid-quinone biosynthesis
HORVU6Hr1G031480	K17761	SSADH; succinate-semialdehyde dehydrogenase, mitochondrial [EC:1.2.1.24]	up	up			00650 Butanoate metabolism	00250 Alanine, aspartate and glutamate metabolism
HORVU6Hr1G031960	K17686	copA; P-type Cu+ transporter [EC:7.2.2.8]				down	04016 MAPK signaling pathway - plant
HORVU6Hr1G032960	K13448	CML; calcium-binding protein CML	up				04626 Plant-pathogen interaction
HORVU6Hr1G033350	K01555	FAH; fumarylacetoacetase [EC:3.7.1.2]				down	00350 Tyrosine metabolism	00643 Styrene degradation
HORVU6Hr1G034680	K22768	MBD9; methyl-CpG-binding domain-containing protein 9 [EC:2.3.1.48]	up
HORVU6Hr1G035160	K18482	ADCL; 4-amino-4-deoxychorismate lyase [EC:4.1.3.38]			down		00790 Folate biosynthesis
HORVU6Hr1G038620	K00784	rnz; ribonuclease Z [EC:3.1.26.11]			up	up	03013 RNA transport
HORVU6Hr1G041920	K14213	PEPD; Xaa-Pro dipeptidase [EC:3.4.13.9]	up		up
HORVU6Hr1G052360	K17275	PLS1; plastin-1	up	up
HORVU6Hr1G056570	K03098	APOD; apolipoprotein D and lipocalin family protein	up	up	up
HORVU6Hr1G057770	K22698	SEY1; protein SEY1 [EC:3.6.5.-]	up	up
HORVU6Hr1G058740	K12119	CRY2; cryptochrome 2		up			04712 Circadian rhythm - plant
HORVU6Hr1G058880	K05391	CNGC; cyclic nucleotide gated channel, plant	down				04626 Plant-pathogen interaction
HORVU6Hr1G062870	K03355	APC8; anaphase-promoting complex subunit 8	down	down			04120 Ubiquitin mediated proteolysis	04110 Cell cycle	04111 Cell cycle - yeast	04113 Meiosis - yeast	04114 Oocyte meiosis
HORVU6Hr1G063830	K00432	gpx; glutathione peroxidase [EC:1.11.1.9]			up		00590 Arachidonic acid metabolism	00480 Glutathione metabolism
HORVU6Hr1G068690	K09843	CYP707A; (+)-abscisic acid 8'-hydroxylase [EC:1.14.14.137]		up			00906 Carotenoid biosynthesis
HORVU6Hr1G069390	K00817	hisC; histidinol-phosphate aminotransferase [EC:2.6.1.9]	down				01230 Biosynthesis of amino acids	00340 Histidine metabolism	00350 Tyrosine metabolism	00360 Phenylalanine metabolism	00400 Phenylalanine, tyrosine and tryptophan biosynthesis	00960 Tropane, piperidine and pyridine alkaloid biosynthesis
HORVU6Hr1G071660	K06689	UBE2D; ubiquitin-conjugating enzyme E2 D [EC:2.3.2.23]			down	down	04141 Protein processing in endoplasmic reticulum	04120 Ubiquitin mediated proteolysis	04013 MAPK signaling pathway - fly
HORVU6Hr1G074030	K01915	glnA; glutamine synthetase [EC:6.3.1.2]		down			01230 Biosynthesis of amino acids	00630 Glyoxylate and dicarboxylate metabolism	00910 Nitrogen metabolism	00250 Alanine, aspartate and glutamate metabolism	00220 Arginine biosynthesis	02020 Two-component system	04217 Necroptosis
HORVU6Hr1G074200	K00207	DPYD; dihydropyrimidine dehydrogenase (NADP+) [EC:1.3.1.2]	up				00240 Pyrimidine metabolism	00410 beta-Alanine metabolism	00770 Pantothenate and CoA biosynthesis	00983 Drug metabolism - other enzymes
HORVU6Hr1G074440	K17098	ANNAT; annexin D		up
HORVU6Hr1G076880	K02437	gcvH; glycine cleavage system H protein			up	up	01200 Carbon metabolism	00630 Glyoxylate and dicarboxylate metabolism	00260 Glycine, serine and threonine metabolism
HORVU6Hr1G077070	K14489	AHK2_3_4; arabidopsis histidine kinase 2/3/4 (cytokinin receptor) [EC:2.7.13.3]				up	04075 Plant hormone signal transduction
HORVU6Hr1G077610	K10664	ATL6S; E3 ubiquitin-protein ligase ATL6/9/15/31/42/55 [EC:2.3.2.27]			up	up
HORVU6Hr1G078420	K01176	AMY; alpha-amylase [EC:3.2.1.1]	down				00500 Starch and sucrose metabolism
HORVU6Hr1G079140	K05396	dcyD; D-cysteine desulfhydrase [EC:4.4.1.15]	up	up	up	up	00270 Cysteine and methionine metabolism
HORVU6Hr1G083720	K15015	SLC32A; solute carrier family 32 (vesicular inhibitory amino acid transporter)	up	up
HORVU6Hr1G083840	K12896	SFRS7; splicing factor, arginine/serine-rich 7			down		03040 Spliceosome
HORVU6Hr1G085870	K17086	TM9SF2_4; transmembrane 9 superfamily member 2/4		down	up
HORVU6Hr1G087000	K07964	HPSE; heparanase [EC:3.2.1.166]	down	down			00531 Glycosaminoglycan degradation
HORVU6Hr1G087990	K01082	cysQ; 3'(2'), 5'-bisphosphate nucleotidase [EC:3.1.3.7]	up	up			00920 Sulfur metabolism
HORVU6Hr1G089780	K00383	GSR; glutathione reductase (NADPH) [EC:1.8.1.7]		down			00480 Glutathione metabolism
HORVU6Hr1G091700	K14509	ETR; ethylene receptor [EC:2.7.13.-]		down			04016 MAPK signaling pathway - plant	04075 Plant hormone signal transduction
HORVU6Hr1G093960	K16221	TCP21; transcription factor TCP21 (protein CCA1 HIKING EXPEDITION)		down			04712 Circadian rhythm - plant
HORVU6Hr1G094790	K13429	CERK1; chitin elicitor receptor kinase 1				down	04626 Plant-pathogen interaction
HORVU7Hr1G000900	K02638	petE; plastocyanin	up	down			00195 Photosynthesis
HORVU7Hr1G002210	K02641	petH; ferredoxin--NADP+ reductase [EC:1.18.1.2]	up				00195 Photosynthesis
HORVU7Hr1G002820	K10529	DOX; alpha-dioxygenase [EC:1.14.99.-]	down	down		up	00592 alpha-Linolenic acid metabolism
HORVU7Hr1G004350	K01244	MTN; 5'-methylthioadenosine nucleosidase [EC:3.2.2.16]			up		00270 Cysteine and methionine metabolism
HORVU7Hr1G006490	K04077	groEL; chaperonin GroEL			up	up	03018 RNA degradation
HORVU7Hr1G012380	K13679	WAXY; granule-bound starch synthase [EC:2.4.1.242]	up			up	00500 Starch and sucrose metabolism
HORVU7Hr1G013170	K11816	YUCCA; indole-3-pyruvate monooxygenase [EC:1.14.13.168]			up		00380 Tryptophan metabolism
HORVU7Hr1G020370	K01674	cah; carbonic anhydrase [EC:4.2.1.1]		down			00910 Nitrogen metabolism
HORVU7Hr1G021840	K01738	cysK; cysteine synthase [EC:2.5.1.47]	down				01200 Carbon metabolism	01230 Biosynthesis of amino acids	00920 Sulfur metabolism	00270 Cysteine and methionine metabolism
HORVU7Hr1G021840	K11253	H3; histone H3	down				01200 Carbon metabolism	01230 Biosynthesis of amino acids	00920 Sulfur metabolism	00270 Cysteine and methionine metabolism
HORVU7Hr1G026940	K09286	EREBP; EREBP-like factor	up	up	up	up
HORVU7Hr1G028250	K08515	VAMP7; vesicle-associated membrane protein 7	up				04130 SNARE interactions in vesicular transport
HORVU7Hr1G031800	K12930	BZ1; anthocyanidin 3-O-glucosyltransferase [EC:2.4.1.115]	down	down			00942 Anthocyanin biosynthesis
HORVU7Hr1G031990	K07052	uncharacterized protein		down
HORVU7Hr1G033170	K00913	ITPK1; inositol-1,3,4-trisphosphate 5/6-kinase / inositol-tetrakisphosphate 1-kinase [EC:2.7.1.159 2.7.1.134]		down			00562 Inositol phosphate metabolism	04070 Phosphatidylinositol signaling system
HORVU7Hr1G033900	K04078	groES; chaperonin GroES				up
HORVU7Hr1G034070	K01785	galM; aldose 1-epimerase [EC:5.1.3.3]	up		up		00010 Glycolysis / Gluconeogenesis	00052 Galactose metabolism
HORVU7Hr1G034560	K00993	EPT1; ethanolaminephosphotransferase [EC:2.7.8.1]	up				00564 Glycerophospholipid metabolism	00565 Ether lipid metabolism	00440 Phosphonate and phosphinate metabolism
HORVU7Hr1G037910	K00891	E2.7.1.71; shikimate kinase [EC:2.7.1.71]			up		01230 Biosynthesis of amino acids	00400 Phenylalanine, tyrosine and tryptophan biosynthesis
HORVU7Hr1G038510	K13496	UGT73C; UDP-glucosyltransferase 73C [EC:2.4.1.-]			up	up	00908 Zeatin biosynthesis
HORVU7Hr1G040460	K00161	PDHA; pyruvate dehydrogenase E1 component alpha subunit [EC:1.2.4.1]	up	up	up	up	01200 Carbon metabolism	00010 Glycolysis / Gluconeogenesis	00020 Citrate cycle	00620 Pyruvate metabolism	04066 HIF-1 signaling pathway
HORVU7Hr1G040970	K21867	AKT; potassium channel	up	up	up
HORVU7Hr1G041230	K13464	JAZ; jasmonate ZIM domain-containing protein		down		up	04075 Plant hormone signal transduction
HORVU7Hr1G042790	K05863	SLC25A4S; solute carrier family 25 (mitochondrial adenine nucleotide translocator), member 4/5/6/31	up	up	up	up	04020 Calcium signaling pathway	04022 cGMP-PKG signaling pathway	04217 Necroptosis	04218 Cellular senescence
HORVU7Hr1G043410	K10838	XPC; xeroderma pigmentosum group C-complementing protein	up				03420 Nucleotide excision repair
HORVU7Hr1G045630	K17279	REEP5_6; receptor expression-enhancing protein 5/6	up	up	up
HORVU7Hr1G046030	K14724	SLC9A8; solute carrier family 9 (sodium/hydrogen exchanger), member 8	up	up
HORVU7Hr1G046040	K03797	E3.4.21.102; carboxyl-terminal processing protease [EC:3.4.21.102]	up	up
HORVU7Hr1G047000	K00895	pfp; diphosphate-dependent phosphofructokinase [EC:2.7.1.90]			down		00010 Glycolysis / Gluconeogenesis	00030 Pentose phosphate pathway	00051 Fructose and mannose metabolism
HORVU7Hr1G047740	K00103	GULO; L-gulonolactone oxidase [EC:1.1.3.8]	down	down			00053 Ascorbate and aldarate metabolism
HORVU7Hr1G048330	K08244	R1; alpha-glucan, water dikinase [EC:2.7.9.4]	up		down	down
HORVU7Hr1G049870	K00830	AGXT; alanine-glyoxylate transaminase / serine-glyoxylate transaminase / serine-pyruvate transaminase [EC:2.6.1.44 2.6.1.45 2.6.1.51]		down			01200 Carbon metabolism	00630 Glyoxylate and dicarboxylate metabolism	00680 Methane metabolism	00250 Alanine, aspartate and glutamate metabolism	00260 Glycine, serine and threonine metabolism	04146 Peroxisome
HORVU7Hr1G050030	K14445	SLC13A2_3_5; solute carrier family 13 (sodium-dependent dicarboxylate transporter), member 2/3/5	up
HORVU7Hr1G051260	K00021	HMGCR; hydroxymethylglutaryl-CoA reductase (NADPH) [EC:1.1.1.34]		up			00900 Terpenoid backbone biosynthesis	04152 AMPK signaling pathway
HORVU7Hr1G052400	K18469	TBC1D5; TBC1 domain family member 5	down
HORVU7Hr1G058730	K08232	E1.6.5.4; monodehydroascorbate reductase (NADH) [EC:1.6.5.4]			up		00053 Ascorbate and aldarate metabolism
HORVU7Hr1G069520	K03086	rpoD; RNA polymerase primary sigma factor		up
HORVU7Hr1G073770	K03257	EIF4A; translation initiation factor 4A	down	down			03013 RNA transport
HORVU7Hr1G074690	K00134	GAPDH; glyceraldehyde 3-phosphate dehydrogenase [EC:1.2.1.12]			up		01200 Carbon metabolism	01230 Biosynthesis of amino acids	00010 Glycolysis / Gluconeogenesis	00710 Carbon fixation in photosynthetic organisms	04066 HIF-1 signaling pathway
HORVU7Hr1G075250	K02953	RP-S13e; small subunit ribosomal protein S13e			up		03010 Ribosome
HORVU7Hr1G077740	K02639	petF; ferredoxin	up	up			00195 Photosynthesis
HORVU7Hr1G078670	K14397	NUDT21; cleavage and polyadenylation specificity factor subunit 5		up			03015 mRNA surveillance pathway
HORVU7Hr1G079430	K00797	speE; spermidine synthase [EC:2.5.1.16]	up				00270 Cysteine and methionine metabolism	00330 Arginine and proline metabolism	00480 Glutathione metabolism
HORVU7Hr1G082450	K00815	TAT; tyrosine aminotransferase [EC:2.6.1.5]	up	up			01230 Biosynthesis of amino acids	00270 Cysteine and methionine metabolism	00350 Tyrosine metabolism	00360 Phenylalanine metabolism	00400 Phenylalanine, tyrosine and tryptophan biosynthesis	00130 Ubiquinone and other terpenoid-quinone biosynthesis	00950 Isoquinoline alkaloid biosynthesis	00960 Tropane, piperidine and pyridine alkaloid biosynthesis
HORVU7Hr1G085450	K10865	MRE11; double-strand break repair protein MRE11	down	down	down	down	03440 Homologous recombination	03450 Non-homologous end-joining	04218 Cellular senescence
HORVU7Hr1G087320	K10357	MYO5; myosin V		down
HORVU7Hr1G087800	K01188	E3.2.1.21; beta-glucosidase [EC:3.2.1.21]	down				00500 Starch and sucrose metabolism	00460 Cyanoamino acid metabolism	00940 Phenylpropanoid biosynthesis
HORVU7Hr1G089040	K18179	COA6; cytochrome c oxidase assembly factor 6		up			04714 Thermogenesis
HORVU7Hr1G089720	K21971	NSUN6; methyltransferase NSUN6 [EC:2.1.1.-]			down
HORVU7Hr1G091860	K01593	DDC; aromatic-L-amino-acid/L-tryptophan decarboxylase [EC:4.1.1.28 4.1.1.105]			up	up	00350 Tyrosine metabolism	00360 Phenylalanine metabolism	00380 Tryptophan metabolism	00901 Indole alkaloid biosynthesis	00950 Isoquinoline alkaloid biosynthesis	00965 Betalain biosynthesis
HORVU7Hr1G092550	K14207	SLC38A2; solute carrier family 38 (sodium-coupled neutral amino acid transporter), member 2	down
HORVU7Hr1G094110	K01874	MARS; methionyl-tRNA synthetase [EC:6.1.1.10]	down	down			00450 Selenocompound metabolism	00970 Aminoacyl-tRNA biosynthesis
HORVU7Hr1G096970	K17911	DWARF27; beta-carotene isomerase [EC:5.2.1.14]		down			00906 Carotenoid biosynthesis
HORVU7Hr1G101220	K18881	DJ1D; D-lactate dehydratase [EC:4.2.1.130]			up		00620 Pyruvate metabolism
HORVU7Hr1G101810	K02895	RP-L24; large subunit ribosomal protein L24	down		down		03010 Ribosome
HORVU7Hr1G103510	K14003	PREB; prolactin regulatory element-binding protein	down				04141 Protein processing in endoplasmic reticulum
HORVU7Hr1G104220	K02955	RP-S14e; small subunit ribosomal protein S14e	up				03010 Ribosome
HORVU7Hr1G107330	K14488	SAUR; SAUR family protein				down	04075 Plant hormone signal transduction
HORVU7Hr1G108000	K10523	SPOP; speckle-type POZ protein	down	down			04340 Hedgehog signaling pathway
HORVU7Hr1G109800	K01669	phrB; deoxyribodipyrimidine photo-lyase [EC:4.1.99.3]	up
HORVU7Hr1G113760	K03130	TAF5; transcription initiation factor TFIID subunit 5			down	down	03022 Basal transcription factors
HORVU7Hr1G114000	K09842	AAO3; abscisic-aldehyde oxidase [EC:1.2.3.14]	up	up			00906 Carotenoid biosynthesis
HORVU7Hr1G114330	K09833	HPT; homogentisate phytyltransferase / homogentisate geranylgeranyltransferase [EC:2.5.1.115 2.5.1.116]		down		down	00130 Ubiquinone and other terpenoid-quinone biosynthesis
HORVU7Hr1G115540	K23025	AVP; H+-translocating diphosphatase [EC:7.1.3.1]	up
HORVU7Hr1G117000	K09487	HSP90B; heat shock protein 90kDa beta				down	04141 Protein processing in endoplasmic reticulum	04151 PI3K-Akt signaling pathway	04626 Plant-pathogen interaction
HORVU7Hr1G118240	K13366	MPAO; polyamine oxidase [EC:1.5.3.14 1.5.3.16 1.5.3.-]	down	down	down		00330 Arginine and proline metabolism	00410 beta-Alanine metabolism
HORVU7Hr1G121250	K09874	NIP; aquaporin NIP				down
HORVU7Hr1G122690	K00889	PIP5K; 1-phosphatidylinositol-4-phosphate 5-kinase [EC:2.7.1.68]	up	up			00562 Inositol phosphate metabolism	04011 MAPK signaling pathway - yeast	04070 Phosphatidylinositol signaling system	04072 Phospholipase D signaling pathway	04144 Endocytosis	04139 Mitophagy - yeast	04810 Regulation of actin cytoskeleton

## Sheet: Supplementary Table S4
Supplementary Table S4. Comparison of microarray and qPCR fold change data for ten genes differentially expressed in CamB and Maresi roots under mild drought conditions. Gene ID (Horvu) - gene identifier based on new barley genome assembly (version Hv_IBSC_PGSB_v2, EnsemblPlants database); Gene ID (MLOC) - gene identifier based on the first barley genome assembly (version 082214v1, EnsemblPlants …
Gene_ID (HORVU)	Gene_ID (MLOC)	fold change (microarrays)		fold change (real time qPCR)		Primers for qPCR		Ta
		CamB	Maresi	CamB	Maresi	Forward	Reverse
HORVU1Hr1G079280	MLOC_82118	284.176	227.333	268.412	282.796	ATGGTACTCGTGTCCGGTTCTG	TAGTGCCACCTTTCGACTGTCC	60°C
HORVU1Hr1G082820	unknown	67.8347	196.333	14.424	60.8073	AGGGAGAAATCCCAGTGAGCAG	ACCGCATAACCAAGCTCCCATAG	60°C
HORVU2Hr1G075930	MLOC_74492	1038.85	1498.3	624.669	1049.98	CCATGCAAATGGCTGTAGTCTTCG	ACGACAGCATACGTGTCAGACC	60°C
HORVU2Hr1G105740	MLOC_65794	1221.15	216.97	459.695	160.64	TGTTGTTGTGGCTAGTGATCCTG	CCGATACATTTATTCCGGCACACG	60°C
HORVU4Hr1G072830	MLOC_4280	277.054	245.717	65.8343	66.7351	AGATCCAACAGTCGGAGAAGATGC	CGCGCATTGACAACGTCACAAG	60°C
HORVU5Hr1G072160	MLOC_70601	260.185	279.701	88.2475	95.8438	CATCAGATTGAGCATCCAGTCCAG	TCGTCGCCTCCATTATGCTCAC	60°C
HORVU5Hr1G092120	unknown	5.11793	5.47715	6.68859	11.3966	GCGTCATGGACAAGATCAAG	CGAGCTTCGTCGGAACATAG	60°C
HORVU6Hr1G020080	MLOC_256	3470.68	744.59	396.424	348.067	TGACGATACGAAGCTGGAAAGCAC	ACTGCCATGGGCGATGAGAATG	60°C
HORVU7Hr1G042790	MLOC_66700	297.294	169.389	253.218	143.47	AAGCTCCAGGTGGTCGTCTTTG	AGCCACCACCATCCGTATTTAGC	60°C
HORVU7Hr1G082040	MLOC_79165	535.661	225.126	446.675	265.58	TTGATTCGCCTGCAAGGTTACAC	ACTCGGATCAGACGGAACAAGC	60°C

## Sheet: Supplementary Table S5
Supplementary Table S5. Supplementary Table S3. The comparison of all identified over-represented Gene Ontology (GO) in the groups of genes that were up- or down-regulated in roots of CamB and Maresdi genotypes. Terms (column C) are separated into three ontologies: biological process (P), molecular function (F) and cellular component (C). P-values and the number of genes (Num) within each of GO c…
GO Information				Sample				(1) CamB root UP		(2) CamB root DOWN		(3) Mar root UP		(4) Mar root DOWN
No.	GO Term	Ontology	Description	1	2	3	4	p-values	Num	p-values	Num	p-values	Num	p-values	Num
1	GO:0008152	P	metabolic process					1.5e-17	159	6.7e-44	224	8.9e-14	132	1.4e-41	241
2	GO:0009415	P	response to water					2.7e-10	9	---	---	5.3e-11	9	---	---
3	GO:0001101	P	response to acid chemical					2.7e-10	9	---	---	5.3e-11	9	---	---
4	GO:0010035	P	response to inorganic substance					4.1e-09	9	---	---	6.8e-10	9	---	---
5	GO:1901700	P	response to oxygen-containing compound					4.1e-09	9	---	---	6.8e-10	9	---	---
6	GO:0009628	P	response to abiotic stimulus					1.3e-08	9	---	---	1.3e-10	10	---	---
7	GO:0044699	P	single-organism process					4.7e-08	76	1.9e-20	111	1.6e-05	60	1e-18	117
8	GO:0071704	P	organic substance metabolic process					4.7e-08	105	3.1e-26	160	5.9e-08	92	1.5e-25	173
9	GO:0009790	P	embryo development					2.2e-07	6	---	---	3.4e-06	5	---	---
10	GO:0044238	P	primary metabolic process					3.1e-07	99	5.7e-20	142	3.2e-07	87	1.2e-22	162
11	GO:0044710	P	single-organism metabolic process					5.3e-07	59	1.1e-14	82	5.4e-05	46	4.5e-12	83
12	GO:0044237	P	cellular metabolic process					1.9e-06	91	9.7e-14	121	3.6e-06	79	5.9e-15	136
13	GO:0009987	P	cellular process					7.3e-06	100	6.4e-14	135	3e-06	89	8.4e-17	156
14	GO:0044707	P	single-multicellular organism process					0.00034	6	---	---	0.00066	5	---	---
15	GO:0006950	P	response to stress					0.00034	19	---	---	0.00018	17	0.0091	18
16	GO:0007275	P	multicellular organism development					0.00034	6	---	---	0.00066	5	---	---
17	GO:0055114	P	oxidation-reduction process					0.00044	36	2.2e-10	54	0.017	26	3.3e-09	56
18	GO:0032502	P	developmental process					0.00044	6	---	---	0.00092	5	---	---
19	GO:0044767	P	single-organism developmental process					0.00044	6	---	---	0.00092	5	---	---
20	GO:0048856	P	anatomical structure development					0.00044	6	---	---	0.00092	5	---	---
21	GO:0042221	P	response to chemical					0.00052	10	---	---	6.4e-05	10	---	---
22	GO:0009058	P	biosynthetic process					0.00062	48	---	---	0.0028	39	---	---
23	GO:0051252	P	regulation of RNA metabolic process					0.00096	22	---	---	2.1e-05	23	0.033	21
24	GO:0019219	P	regulation of nucleobase-containing compound metabolic process					0.0012	22	---	---	2.6e-05	23	0.039	21
25	GO:0097659	P	nucleic acid-templated transcription					0.0012	24	---	---	5.4e-05	24	---	---
26	GO:0006351	P	transcription, DNA-templated					0.0012	24	---	---	5.4e-05	24	---	---
27	GO:0032774	P	RNA biosynthetic process					0.0012	24	---	---	5.4e-05	24	---	---
28	GO:0050896	P	response to stimulus					0.0014	24	---	---	0.00051	22	0.00067	29
29	GO:0051171	P	regulation of nitrogen compound metabolic process					0.0015	22	---	---	3.2e-05	23	---	---
30	GO:0080090	P	regulation of primary metabolic process					0.0017	22	---	---	4e-05	23	---	---
31	GO:0050794	P	regulation of cellular process					0.0017	28	---	---	1.7e-05	30	0.0018	33
32	GO:0043170	P	macromolecule metabolic process					0.0017	68	3e-11	101	0.0013	59	1.5e-15	122
33	GO:0060255	P	regulation of macromolecule metabolic process					0.0017	22	---	---	4.6e-05	23	---	---
34	GO:2001141	P	regulation of RNA biosynthetic process					0.0017	21	---	---	2.1e-05	23	---	---
35	GO:0006355	P	regulation of transcription, DNA-templated					0.0017	21	---	---	2.1e-05	23	---	---
36	GO:1903506	P	regulation of nucleic acid-templated transcription					0.0017	21	---	---	2.1e-05	23	---	---
37	GO:0031323	P	regulation of cellular metabolic process					0.0017	22	---	---	4.6e-05	23	0.036	22
38	GO:0050789	P	regulation of biological process					0.002	28	---	---	2.1e-05	30	0.0026	33
39	GO:0019222	P	regulation of metabolic process					0.0021	22	---	---	5.4e-05	23	0.042	22
40	GO:0034654	P	nucleobase-containing compound biosynthetic process					0.0021	25	---	---	0.00013	25	---	---
41	GO:0065007	P	biological regulation					0.0023	29	---	---	1.4e-05	32	0.004	34
42	GO:0018130	P	heterocycle biosynthetic process					0.0023	26	---	---	0.00038	25	---	---
43	GO:0009889	P	regulation of biosynthetic process					0.0023	21	---	---	3.2e-05	23	---	---
44	GO:0010556	P	regulation of macromolecule biosynthetic process					0.0023	21	---	---	3.2e-05	23	---	---
45	GO:0031326	P	regulation of cellular biosynthetic process					0.0023	21	---	---	3.2e-05	23	---	---
46	GO:2000112	P	regulation of cellular macromolecule biosynthetic process					0.0023	21	---	---	3.2e-05	23	---	---
47	GO:0010468	P	regulation of gene expression					0.0024	21	---	---	3.2e-05	23	---	---
48	GO:0016070	P	RNA metabolic process					0.0026	27	---	---	0.00096	25	---	---
49	GO:1901362	P	organic cyclic compound biosynthetic process					0.0028	26	---	---	0.00051	25	---	---
50	GO:0044763	P	single-organism cellular process					0.0028	36	1.1e-08	55	0.0021	32	4.8e-08	58
51	GO:0044249	P	cellular biosynthetic process					0.0028	43	---	---	0.0082	36	---	---
52	GO:1901576	P	organic substance biosynthetic process					0.0028	43	---	---	0.014	35	---	---
53	GO:0019438	P	aromatic compound biosynthetic process					0.0036	25	---	---	0.00031	25	---	---
54	GO:0005975	P	carbohydrate metabolic process					0.0036	18	2.7e-13	38	0.01	15	1e-09	35
55	GO:0044281	P	small molecule metabolic process					0.0043	19	0.023	19	0.024	15	---	---
56	GO:0090304	P	nucleic acid metabolic process					0.0056	29	---	---	0.0042	26	---	---
57	GO:0006082	P	organic acid metabolic process					0.015	13	0.003	16	0.026	11	---	---
58	GO:0044260	P	cellular macromolecule metabolic process					0.021	57	2.2e-10	92	0.014	50	1.2e-14	112
59	GO:0044271	P	cellular nitrogen compound biosynthetic process					0.03	32	---	---	0.044	27	---	---
60	GO:0032501	P	multicellular organismal process					0.034	6	3.2e-06	12	---	---	2.4e-07	14
61	GO:0034645	P	cellular macromolecule biosynthetic process					0.043	31	---	---	---	---	---	---
62	GO:0006139	P	nucleobase-containing compound metabolic process					0.043	30	---	---	0.013	28	---	---
63	GO:0019752	P	carboxylic acid metabolic process					0.043	11	0.02	13	---	---	---	---
64	GO:0009059	P	macromolecule biosynthetic process					0.043	31	---	---	---	---	---	---
65	GO:0043436	P	oxoacid metabolic process					0.043	11	0.0084	14	---	---	---	---
66	GO:0006810	P	transport					0.046	24	5.5e-05	36	0.044	21	---	---
67	GO:0044255	P	cellular lipid metabolic process					0.046	8	---	---	---	---	---	---
68	GO:0046483	P	heterocycle metabolic process					0.046	31	---	---	0.014	29	---	---
69	GO:0051234	P	establishment of localization					0.046	24	5.8e-05	36	0.044	21	---	---
70	GO:0010467	P	gene expression					0.046	31	---	---	---	---	---	---
71	GO:0051179	P	localization					0.047	24	6.1e-05	36	0.025	22	---	---
102	GO:0006468	P	protein phosphorylation					---	---	6.8e-25	70	---	---	1.5e-25	76
103	GO:0016310	P	phosphorylation					---	---	1e-23	71	---	---	2.3e-24	77
104	GO:0036211	P	protein modification process					---	---	1.4e-21	72	---	---	1.5e-21	77
105	GO:0006464	P	cellular protein modification process					---	---	1.4e-21	72	---	---	1.5e-21	77
106	GO:0043412	P	macromolecule modification					---	---	1e-20	72	---	---	1.3e-20	77
107	GO:0006796	P	phosphate-containing compound metabolic process					---	---	1.9e-20	72	0.031	25	1.7e-22	81
108	GO:0006793	P	phosphorus metabolic process					---	---	2e-20	72	0.032	25	1.7e-22	81
109	GO:0019538	P	protein metabolic process					---	---	9e-14	82	---	---	1e-13	89
110	GO:0044267	P	cellular protein metabolic process					---	---	1.7e-13	74	---	---	7.1e-13	79
111	GO:0051704	P	multi-organism process					---	---	7.6e-08	14	---	---	3.6e-08	15
112	GO:0044706	P	multi-multicellular organism process					---	---	8e-08	12	---	---	3.6e-09	14
113	GO:0009875	P	pollen-pistil interaction					---	---	8e-08	12	---	---	3.6e-09	14
114	GO:0008037	P	cell recognition					---	---	8e-08	12	---	---	3.6e-09	14
115	GO:0048544	P	recognition of pollen					---	---	8e-08	12	---	---	3.6e-09	14
116	GO:0009856	P	pollination					---	---	8e-08	12	---	---	3.6e-09	14
117	GO:0044702	P	single organism reproductive process					---	---	8.4e-08	12	---	---	3.8e-09	14
118	GO:0044703	P	multi-organism reproductive process					---	---	1.1e-06	12	---	---	8.1e-09	15
119	GO:0000003	P	reproduction					---	---	1.1e-06	12	---	---	9e-09	15
120	GO:0022414	P	reproductive process					---	---	1.1e-06	12	---	---	9e-09	15
121	GO:0007154	P	cell communication					---	---	1.6e-05	17	---	---	2.4e-07	21
122	GO:0016051	P	carbohydrate biosynthetic process					---	---	0.00053	8	---	---	0.0011	8
123	GO:0044262	P	cellular carbohydrate metabolic process					---	---	0.0014	9	---	---	0.0028	9
124	GO:0034637	P	cellular carbohydrate biosynthetic process					---	---	0.0019	7	---	---	0.00061	8
125	GO:0044723	P	single-organism carbohydrate metabolic process					---	---	0.0086	10	---	---	---	---
126	GO:0033692	P	cellular polysaccharide biosynthetic process					---	---	0.0089	5	---	---	0.00028	7
127	GO:0000271	P	polysaccharide biosynthetic process					---	---	0.0089	5	---	---	0.00028	7
128	GO:0044264	P	cellular polysaccharide metabolic process					---	---	0.011	6	---	---	0.00061	8
129	GO:0005976	P	polysaccharide metabolic process					---	---	0.016	6	---	---	0.001	8
130	GO:0044712	P	single-organism catabolic process					---	---	0.023	6	---	---	---	---
131	GO:0006073	P	cellular glucan metabolic process					---	---	0.04	5	---	---	0.0022	7
132	GO:0044042	P	glucan metabolic process					---	---	0.04	5	---	---	0.0022	7
133	GO:0006979	P	response to oxidative stress					---	---	0.046	8	---	---	0.03	9
180	GO:0046486	P	glycerolipid metabolic process					---	---	---	---	0.0044	5	---	---
181	GO:0006725	P	cellular aromatic compound metabolic process					---	---	---	---	0.0087	30	---	---
182	GO:1901360	P	organic cyclic compound metabolic process					---	---	---	---	0.01	30	---	---
183	GO:0055085	P	transmembrane transport					---	---	---	---	0.028	13	---	---
184	GO:0006807	P	nitrogen compound metabolic process					---	---	---	---	0.035	37	---	---
186	GO:0030243	P	cellulose metabolic process					---	---	---	---	---	---	0.00015	6
187	GO:0030244	P	cellulose biosynthetic process					---	---	---	---	---	---	0.00015	6
188	GO:0051273	P	beta-glucan metabolic process					---	---	---	---	---	---	0.0006	6
189	GO:0051274	P	beta-glucan biosynthetic process					---	---	---	---	---	---	0.0006	6
190	GO:0009250	P	glucan biosynthetic process					---	---	---	---	---	---	0.0011	6
191	GO:0030001	P	metal ion transport					---	---	---	---	---	---	0.04	8
72	GO:0003824	F	catalytic activity					3.8e-18	155	4.5e-64	246	3.8e-13	126	3.5e-54	254
73	GO:0005488	F	binding					4.8e-12	173	6.1e-19	208	4.2e-12	151	7.9e-28	252
74	GO:0030414	F	peptidase inhibitor activity					6.8e-05	8	---	---	0.0087	5	0.00057	7
75	GO:0004866	F	endopeptidase inhibitor activity					6.8e-05	8	---	---	0.0087	5	0.00057	7
76	GO:0061135	F	endopeptidase regulator activity					6.8e-05	8	---	---	0.0087	5	0.00057	7
77	GO:0061134	F	peptidase regulator activity					6.8e-05	8	---	---	0.0087	5	0.00057	7
78	GO:0043167	F	ion binding					0.00029	49	5.5e-05	54	0.00058	42	0.00014	58
79	GO:0043169	F	cation binding					0.0003	47	0.00043	49	0.00043	41	0.00023	55
80	GO:0016740	F	transferase activity					0.00062	53	1.9e-26	108	0.00035	48	2.6e-26	116
81	GO:0016491	F	oxidoreductase activity					0.00065	37	5.4e-13	60	0.0087	29	1.6e-10	60
82	GO:0016787	F	hydrolase activity					0.00073	44	9.8e-08	58	---	---	6.3e-08	64
83	GO:1901363	F	heterocyclic compound binding					0.0012	89	1.7e-14	133	0.00041	80	2.2e-23	168
84	GO:0097159	F	organic cyclic compound binding					0.0012	89	1.7e-14	133	0.00041	80	2.2e-23	168
85	GO:0004857	F	enzyme inhibitor activity					0.0015	9	---	---	---	---	0.0031	9
86	GO:0043565	F	sequence-specific DNA binding					0.0025	11	---	---	0.00073	11	0.0065	11
87	GO:0046872	F	metal ion binding					0.0034	42	0.00028	49	0.0044	37	0.00026	54
88	GO:0001071	F	nucleic acid binding transcription factor activity					0.0034	14	---	---	2.2e-05	17	0.0051	15
89	GO:0003700	F	transcription factor activity, sequence-specific DNA binding					0.0034	14	---	---	2.2e-05	17	0.0051	15
90	GO:0005506	F	iron ion binding					0.0041	14	0.017	13	0.029	11	0.017	14
91	GO:0016903	F	oxidoreductase activity, acting on the aldehyde or oxo group of donors					0.0071	5	---	---	---	---	---	---
92	GO:0004867	F	serine-type endopeptidase inhibitor activity					0.0072	5	---	---	---	---	0.00021	7
93	GO:0030234	F	enzyme regulator activity					0.0074	9	---	---	---	---	0.0052	10
94	GO:0003677	F	DNA binding					0.0098	30	---	---	0.0022	29	---	---
95	GO:0098772	F	molecular function regulator					0.012	9	---	---	---	---	0.009	10
96	GO:0008194	F	UDP-glycosyltransferase activity					0.022	6	---	---	---	---	0.034	6
97	GO:0016788	F	hydrolase activity, acting on ester bonds					0.03	13	---	---	---	---	---	---
98	GO:0048037	F	cofactor binding					0.036	12	0.00031	17	---	---	0.0032	16
99	GO:0004553	F	hydrolase activity, hydrolyzing O-glycosyl compounds					0.037	11	4.4e-11	26	---	---	4.3e-09	25
100	GO:0005515	F	protein binding					0.037	55	0.034	60	0.04	48	0.0026	73
134	GO:0004672	F	protein kinase activity					---	---	7.4e-25	70	---	---	4.6e-27	78
135	GO:0016773	F	phosphotransferase activity, alcohol group as acceptor					---	---	5.6e-23	70	0.036	23	9.1e-26	79
136	GO:0016301	F	kinase activity					---	---	7.8e-23	70	0.021	24	1.4e-25	79
137	GO:0016772	F	transferase activity, transferring phosphorus-containing groups					---	---	8.3e-20	70	---	---	1.2e-22	79
138	GO:0032559	F	adenyl ribonucleotide binding					---	---	5.3e-19	85	---	---	4.6e-24	101
139	GO:0030554	F	adenyl nucleotide binding					---	---	5.3e-19	85	---	---	4.6e-24	101
140	GO:0005524	F	ATP binding					---	---	6.1e-19	78	---	---	1.3e-22	90
141	GO:0097367	F	carbohydrate derivative binding					---	---	6.6e-19	89	---	---	4.9e-23	104
142	GO:0032549	F	ribonucleoside binding					---	---	6.6e-19	88	---	---	4.2e-23	103
143	GO:0032555	F	purine ribonucleotide binding					---	---	6.6e-19	88	---	---	4.2e-23	103
144	GO:0032550	F	purine ribonucleoside binding					---	---	6.6e-19	88	---	---	4.2e-23	103
145	GO:0032553	F	ribonucleotide binding					---	---	6.6e-19	89	---	---	4.2e-23	104
146	GO:0001883	F	purine nucleoside binding					---	---	6.6e-19	88	---	---	4.2e-23	103
147	GO:0001882	F	nucleoside binding					---	---	6.6e-19	88	---	---	4.2e-23	103
148	GO:0017076	F	purine nucleotide binding					---	---	6.8e-19	88	---	---	4.6e-23	103
149	GO:0035639	F	purine ribonucleoside triphosphate binding					---	---	1.1e-18	81	---	---	3.6e-21	92
150	GO:0000166	F	nucleotide binding					---	---	2.1e-18	97	---	---	1.6e-23	116
151	GO:1901265	F	nucleoside phosphate binding					---	---	2.1e-18	97	---	---	1.6e-23	116
152	GO:0036094	F	small molecule binding					---	---	3.2e-18	97	---	---	2.2e-23	116
153	GO:0016798	F	hydrolase activity, acting on glycosyl bonds					---	---	5.1e-11	27	---	---	5.1e-09	26
154	GO:0030246	F	carbohydrate binding					---	---	8.4e-06	14	---	---	4.1e-05	14
155	GO:0020037	F	heme binding					---	---	3.5e-05	22	---	---	8.3e-05	23
156	GO:0046906	F	tetrapyrrole binding					---	---	5e-05	22	---	---	0.00012	23
157	GO:0005215	F	transporter activity					---	---	0.0001	25	---	---	---	---
158	GO:0016705	F	oxidoreductase activity, acting on paired donors, with incorporation or reduction of molecular oxygen					---	---	0.00048	16	---	---	0.00021	18
159	GO:0008171	F	O-methyltransferase activity					---	---	0.0029	5	---	---	0.00057	6
160	GO:0005509	F	calcium ion binding					---	---	0.0044	11	---	---	0.0031	12
161	GO:0035251	F	UDP-glucosyltransferase activity					---	---	0.0087	5	---	---	0.0021	6
162	GO:0046527	F	glucosyltransferase activity					---	---	0.009	5	---	---	0.0021	6
163	GO:0005507	F	copper ion binding					---	---	0.011	5	---	---	0.015	5
164	GO:0004601	F	peroxidase activity					---	---	0.012	9	---	---	0.0021	11
165	GO:0016684	F	oxidoreductase activity, acting on peroxide as acceptor					---	---	0.012	9	---	---	0.0021	11
166	GO:0004674	F	protein serine/threonine kinase activity					---	---	0.014	6	---	---	4.9e-07	12
167	GO:0050660	F	flavin adenine dinucleotide binding					---	---	0.014	7	---	---	6.5e-05	11
168	GO:0016209	F	antioxidant activity					---	---	0.016	9	---	---	0.0031	11
169	GO:0030170	F	pyridoxal phosphate binding					---	---	0.025	5	---	---	---	---
170	GO:0050662	F	coenzyme binding					---	---	0.033	10	---	---	0.025	11
171	GO:0016746	F	transferase activity, transferring acyl groups					---	---	0.034	10	---	---	0.0092	12
172	GO:0016758	F	transferase activity, transferring hexosyl groups					---	---	0.034	11	---	---	---	---
173	GO:0046914	F	transition metal ion binding					---	---	0.034	30	---	---	---	---
174	GO:0016829	F	lyase activity					---	---	0.036	8	---	---	---	---
175	GO:0008168	F	methyltransferase activity					---	---	0.039	8	---	---	---	---
176	GO:0016747	F	transferase activity, transferring acyl groups other than amino-acyl groups					---	---	0.041	9	---	---	0.032	10
177	GO:0016741	F	transferase activity, transferring one-carbon groups					---	---	0.049	8	---	---	---	---
192	GO:0016760	F	cellulose synthase (UDP-forming) activity					---	---	---	---	---	---	6.5e-05	6
193	GO:0016759	F	cellulose synthase activity					---	---	---	---	---	---	6.5e-05	6
194	GO:0043531	F	ADP binding					---	---	---	---	---	---	0.035	11
195	GO:0001871	F	pattern binding					---	---	---	---	---	---	0.04	5
196	GO:0030247	F	polysaccharide binding					---	---	---	---	---	---	0.04	5
101	GO:0009522	C	photosystem I					0.041	5	---	---	---	---	---	---
178	GO:0005576	C	extracellular region					---	---	1.7e-05	13	---	---	9.9e-07	15
179	GO:0016020	C	membrane					---	---	0.00032	45	---	---	5.7e-07	58
185	GO:0044425	C	membrane part					---	---	---	---	0.027	22	0.0031	30
197	GO:0031224	C	intrinsic component of membrane					---	---	---	---	---	---	0.00034	28
198	GO:0016021	C	integral component of membrane					---	---	---	---	---	---	0.00051	27

## Sheet: Supplementary Table S6
Supplementary Table S6. The genes differentially expressed in roots and leaves after drought stress of CamB and Maresi genotypes, involved in photosynthesis process. n/c – no change
Gene_ID (HORVU)	Gene_ID (MLOC)	Gene description	Expression change
			CamB roots	Mar roots	CamB leaves	Mar leaves
HORVU0Hr1G003270	MLOC_72691	Oxygen-evolving enhancer protein 3-1 (PSBQ1)	up	up	n/c	n/c
HORVU2Hr1G057700	MLOC_78630	Oxygen-evolving enhancer protein 1	down	down	n/c	n/c
HORVU0Hr1G001490	MLOC_53469	Photosystem I reaction center subunit VI (PSAH)	up	up	n/c	n/c
HORVU2Hr1G019820	MLOC_6377	Photosystem I reaction center subunit N (PSAN)	up	up	n/c	n/c
HORVU5Hr1G071920	MLOC_74483	Photosystem I reaction center subunit V (PSAG)	up	up	n/c	n/c
HORVU5Hr1G100140	MLOC_66074	Photosystem I reaction center subunit III (PSAF)	up	up	n/c	n/c
HORVU3Hr1G009210	MLOC_53258	Photosystem I reaction center subunit XI (PSAL)	up	n/c	n/c	n/c
HORVU2Hr1G086040	MLOC_75514	Photosystem II reaction center PsbP family protein	n/c	up	n/c	n/c
HORVU3Hr1G082730	MLOC_55858	Photosystem II 22 kDa protein	up	n/c	n/c	n/c
HORVU7Hr1G000900	MLOC_75066	Plastocyanin	up	down	n/c	n/c
HORVU2Hr1G036960	MLOC_60073	Chlorophyll a-b binding protein 7	up	up	n/c	n/c
HORVU2Hr1G038940	MLOC_37052	Photosystem II 10 kDa polypeptide	n/c	n/c	down	down
HORVU2Hr1G090070	MLOC_17228	Photosynthetic NDH subunit of lumenal location 3	n/c	n/c	n/c	down
HORVU4Hr1G027260	MLOC_70817	Ribulose bisphosphate carboxylase/oxygenase activase A	n/c	down	n/c	up
HORVU5Hr1G124160	MLOC_67012	Chlorophyll a-b binding protein 2	n/c	n/c	down	down
HORVU6Hr1G016850	MLOC_72290	Chlorophyll a-b binding protein	n/c	n/c	up	up

## Sheet: Supplementary Table S7
Supplementary Table S7. The list of transcription factors and transcriptional regulators encoding genes identified within genes differentially expressed in CamB and Maresi roots under the mild drought stress. The information on possible differential expression of a particular gene in leaves after drought is provided. Green background indicates these DEGs that were common between mild and severe d…
Gene_ID (HORVU)	Gene_ID (MLOC)	Family Name	Category	Expression change				Gene description	Chromosome	GO Ids	Pfam Ids	InterPro Ids	Notes
				Cam Root	Mar Root	Cam Leaves	Mar leaves
HORVU1Hr1G090250	MLOC_53577	AP2/ERF-ERF	Transcription factor	up	up	up	up	Ethylene-responsive transcription factor 1	chr1H	GO:0003677, GO:0003700, GO:0006355	PF00847	IPR001471, IPR016177	common to mild and severe drought
HORVU3Hr1G010190	MLOC_75135	AP2/ERF-ERF	Transcription factor	down	down		down	B3 domain-containing transcription factor NGA2	chr3H	GO:0003677, GO:0003700, GO:0006355	PF00847, PF02362	IPR001471, IPR003340, IPR015300, IPR016177	common to mild and severe drought
HORVU7Hr1G026940	MLOC_76250	AP2/ERF-ERF	Transcription factor	up	up	up	up	Ethylene-responsive transcription factor 5	chr7H	GO:0003677, GO:0003700, GO:0006355	PF00847	IPR001471, IPR016177	common to mild and severe drought
HORVU7Hr1G089930	MLOC_59305	AP2/ERF-ERF	Transcription factor	up	up			Ethylene-responsive transcription factor 1	chr7H	GO:0003677, GO:0003700, GO:0006355	PF00847	IPR001471, IPR016177	common to mild and severe drought
HORVU2Hr1G050260	MLOC_26140	AP2/ERF-ERF	Transcription factor		up			Ulp1 protease family, C-terminal catalytic domain containing protein	chr2H	none	none	none	specific to mild drought
HORVU4Hr1G077310	MLOC_13305	AP2/ERF-ERF	Transcription factor		down			Ethylene-responsive transcription factor	chr4H	GO:0003677, GO:0003700, GO:0006355	PF00847	IPR001471, IPR016177	specific to mild drought
HORVU5Hr1G080300	MLOC_54227	AP2/ERF-ERF	Transcription factor		down		down	Dehydration-responsive element-binding protein 1B	chr5H	GO:0003677, GO:0003700, GO:0006355	PF00847	IPR001471, IPR016177	specific to mild drought
HORVU6Hr1G080340	MLOC_20119	AP2/ERF-ERF	Transcription factor		up	up	up	Ethylene-responsive transcription factor 5	chr6H	GO:0003677, GO:0003700, GO:0006355	PF00847	IPR001471, IPR016177	specific to mild drought
HORVU1Hr1G082670	MLOC_38822	AP2/ERF-RAV	Transcription factor	down	down		down	AP2/B3 transcription factor family protein	chr1H	GO:0003677, GO:0003700, GO:0006355	PF00847, PF02362	IPR001471, IPR003340, IPR015300, IPR016177	specific to mild drought
HORVU1Hr1G017770	MLOC_52044	AUX/IAA	Transcriptional regulator	down	down			Auxin-responsive protein IAA4	chr1H	GO:0005515, GO:0005634, GO:0006355	PF02309	IPR000270, IPR003311	common to mild and severe drought
HORVU6Hr1G088140	MLOC_51312	AUX/IAA	Transcriptional regulator	up	up			Auxin-responsive protein IAA9	chr6H	GO:0005515, GO:0005634, GO:0006355	PF02309	IPR000270, IPR003311	specific to mild drought
HORVU3Hr1G105720	MLOC_64376	B3	Transcription factor		down			B3 domain-containing protein	chr3H	GO:0003677	PF02362	IPR003340, IPR015300	specific to mild drought
HORVU5Hr1G017450	MLOC_66004	B3	Transcription factor		up			B3 domain-containing protein	chr5H	GO:0003677	PF02362	IPR003340, IPR015300	specific to mild drought
HORVU3Hr1G105790	MLOC_54810	B3	Transcription factor	down	down		down	Glucan endo-1,3-beta-glucosidase GI	chr3H	GO:0004553, GO:0005975	PF00332	IPR000490, IPR013781, IPR017853	specific to mild drought
HORVU5Hr1G040620	MLOC_56530	B3	Transcription factor	up	up			auxin response factor 17	chr5H	GO:0003677	PF02362	IPR003340, IPR015300	specific to mild drought
HORVU5Hr1G061120	MLOC_63374	BAH domain	Transcriptional regulator	down				agenet domain-containing protein / bromo-adjacent homology (BAH) domain-containing protein	chr5H	GO:0003682	PF01426, PF05641	IPR001025, IPR008395, IPR014002	specific to mild drought
HORVU7Hr1G055180	MLOC_44870	bHLH	Transcription factor	down	down			Transcription factor bHLH137	chr7H	GO:0046983	PF00010	IPR011598	common to mild and severe drought
HORVU3Hr1G108680	MLOC_36351	bHLH	Transcription factor		up			Transcription factor ORG2	chr3H	GO:0046983	PF00010	IPR011598	common to mild and severe drought
HORVU5Hr1G002090	MLOC_67937	bHLH	Transcription factor		down			basic helix-loop-helix (bHLH) DNA-binding superfamily protein	chr5H	GO:0046983	PF00010	IPR011598	specific to mild drought
HORVU4HR1G087580	MLOC_73706	bHLH	Transcription factor	up				Chromosome 3B, genomic scaffold, cultivar Chinese Spring	chr4H	GO:0046983	none	IPR011598	specific to mild drought
HORVU6Hr1G054910	MLOC_12058	bHLH	Transcription factor	down	down			Transcription factor bHLH128	chr6H	GO:0046983	PF00010	IPR011598	specific to mild drought
HORVU0Hr1G013950	MLOC_79342	bZIP	Transcription factor	up	up			G-box binding factor 3	chrUn	GO:0003700, GO:0006355, GO:0043565	PF00170	IPR004827	common to mild and severe drought
HORVU4Hr1G021720	MLOC_15316	bZIP	Transcription factor	up	up			G-box binding factor 3	chr4H	GO:0003700, GO:0006355, GO:0043565	PF00170	IPR004827	common to mild and severe drought
HORVU1Hr1G086580	MLOC_15949	bZIP	Transcription factor	up	up			BEST Arabidopsis thaliana protein match is: transcription factor-related .	chr1H	GO:0006351, GO:0043565	PF14144	IPR025422	common to mild and severe drought
HORVU1Hr1G090030	MLOC_6711	bZIP	Transcription factor	up	up			G-box binding factor 2	chr1H	GO:0003700, GO:0006355, GO:0043565	PF00170, PF07777, PF16596	IPR004827, IPR012900	specific to mild drought
HORVU5Hr1G014170	MLOC_81003	bZIP	Transcription factor	down	down	down	down	Basic-leucine zipper (bZIP) transcription factor family protein	chr5H	GO:0003700, GO:0006355, GO:0043565	PF00170, PF12498	IPR004827, IPR020983	specific to mild drought
HORVU6Hr1G071950	MLOC_50966	C2C2-CO-like	Transcription factor		down			Zinc finger protein CONSTANS-LIKE 10	chr6H	GO:0005515, GO:0005622, GO:0008270	PF00643, PF06203	IPR000315, IPR010402	common to mild and severe drought
HORVU4Hr1G088280	MLOC_39421	C2C2-GATA	Transcription factor		up	up	up	GATA transcription factor 2	chr4H	GO:0003700, GO:0006355, GO:0008270, GO:0043565	PF00320	IPR000679, IPR013088	specific to mild drought
HORVU3Hr1G019510	MLOC_63525	C3H	Transcription factor	up	up	up	up	Zinc finger CCCH domain-containing protein 2	chr3H	GO:0046872	PF00642	IPR000571	common to mild and severe drought
HORVU3Hr1G073470	MLOC_54333	CPP	Transcription factor	up				Protein tesmin/TSO1-like CXC 5	chr3H	none	PF03638	IPR005172	specific to mild drought
HORVU4Hr1G066480	MLOC_39711	GARP-ARR-B	Transcription factor	down	down			Two-component response regulator ORR21	chr4H	GO:0000160, GO:0003677, GO:0003700, GO:0007165	PF00072, PF00249	IPR001005, IPR001789, IPR006447, IPR009057, IPR011006, IPR017053, IPR017930	specific to mild drought
HORVU2Hr1G020140	MLOC_72007	GARP-G2-like	Transcription factor	up			up	Two-component response regulator ARR18	chr2H	GO:0003677	PF00249	IPR001005, IPR006447, IPR009057, IPR017930	common to mild and severe drought
HORVU7Hr1G096430	MLOC_54829	GARP-G2-like	Transcription factor	down				myb-like transcription factor family protein	chr7H	GO:0003677	PF00249, PF14379	IPR001005, IPR006447, IPR009057, IPR017930, IPR025756	common to mild and severe drought
HORVU6Hr1G068100	MLOC_14844	GARP-G2-like	Transcription factor	up	up			myb-like transcription factor family protein	chr6H	GO:0003677	PF00249, PF14379	IPR001005, IPR006447, IPR009057, IPR017930, IPR025756	specific to mild drought
HORVU5Hr1G110960	MLOC_70032	General TF	Transcription factor	up				Transcription initiation factor IIE subunit beta	chr5H	GO:0005673, GO:0006367	PF02186	IPR003166, IPR016656	specific to mild drought
HORVU4Hr1G080460	MLOC_15181	GRAS	Transcription factor	up	up		up	GRAS family transcription factor	chr4H	none	PF03514	IPR005202	common to mild and severe drought
HORVU5Hr1G099160	MLOC_36533	GRAS	Transcription factor	down	down			NB-ARC domain containing protein	chr5H	none	none	IPR027417	specific to mild drought
HORVU3Hr1G085720	MLOC_66099	HB-BELL	Transcription factor		down			BEL1-like homeodomain 8	chr3H	GO:0003677, GO:0006355	PF05920, PF07526	IPR001356, IPR006563, IPR008422, IPR009057	common to mild and severe drought
HORVU1Hr1G055930	MLOC_54921	HB-HD-ZIP	Transcription factor	up	up			homeobox-leucine zipper protein 4	chr1H	GO:0003677, GO:0003700, GO:0005634, GO:0006355, GO:0043565	PF00046, PF02183, PF04618	IPR001356, IPR003106, IPR006712, IPR009057, IPR017970	common to mild and severe drought
HORVU5Hr1G067010	MLOC_77955	HB-HD-ZIP	Transcription factor		down			Homeobox-leucine zipper protein family	chr5H	GO:0003677, GO:0003700, GO:0006355, GO:0043565	PF00046, PF02183	IPR001356, IPR003106, IPR009057, IPR017970	common to mild and severe drought
HORVU2Hr1G061320	MLOC_11678	HB-KNOX	Transcription factor		down			Homeobox protein knotted-1-like 12	chr2H	GO:0003677, GO:0005634, GO:0006355, GO:0043565	PF03789, PF03790, PF03791, PF05920	IPR001356, IPR005539, IPR005540, IPR005541, IPR008422, IPR009057, IPR017970	specific to mild drought
HORVU5Hr1G098570	unknown	HB-KNOX	Transcription factor		down			Homeobox protein knotted-1-like 12	chr5H	GO:0003677, GO:0005634, GO:0006355, GO:0043565	PF03789, PF03790, PF03791, PF05920	IPR001356, IPR005539, IPR005540, IPR005541, IPR008422, IPR009057, IPR017970	specific to mild drought
HORVU2Hr1G014590	MLOC_75519	HSF	Transcription factor	up	up		up	Heat stress transcription factor A-2b	chr2H	GO:0003700, GO:0005634, GO:0006355, GO:0043565	PF00447	IPR000232, IPR011991	common to mild and severe drought
HORVU7Hr1G056820	MLOC_75166	HSF	Transcription factor	up	up	up	up	Heat stress transcription factor B-2b	chr7H	GO:0003700, GO:0005634, GO:0006355, GO:0043565	PF00447	IPR000232, IPR011991	common to mild and severe drought
HORVU7Hr1G088920	MLOC_73300	HSF	Transcription factor	up	up	up	up	Heat stress transcription factor C-2b	chr7H	GO:0003700, GO:0005634, GO:0006355, GO:0043565	PF00447	IPR000232, IPR011991	common to mild and severe drought
HORVU4Hr1G090850	MLOC_67158	HSF	Transcription factor	up	up	up	up	Heat stress transcription factor C-2a	chr4H	GO:0003700, GO:0005634, GO:0006355, GO:0043565	PF00447	IPR000232, IPR011991	specific to mild drought
HORVU5Hr1G047610	MLOC_5148	LOB	Transcription factor	up	up			LOB domain-containing protein 4	chr5H	none	PF03195	IPR004883	common to mild and severe drought
HORVU0Hr1G003020	MLOC_38061	MADS-M-type	Transcription factor		down			MADS-box transcription factor 18	chrUn	GO:0003700, GO:0005634, GO:0006355	PF01486	IPR002487	common to mild and severe drought
HORVU3Hr1G095090	MLOC_34961	MADS-M-type	Transcription factor		down			MADS-box transcription factor family protein	chr3H	GO:0003677, GO:0046983	PF00319	IPR002100	specific to mild drought
HORVU3Hr1G095200	MLOC_38000	MADS-M-type	Transcription factor	up	up		up	MADS-box transcription factor family protein	chr3H	GO:0003677, GO:0046983	PF00319	IPR002100	specific to mild drought
HORVU2Hr1G061060	MLOC_63300	mTERF	Transcriptional regulator	up	up			Mitochondrial transcription termination factor family protein	chr2H	none	none	none	common to mild and severe drought
HORVU4Hr1G013780	MLOC_53538	mTERF	Transcriptional regulator	down	down	down		Mitochondrial transcription termination factor family protein	chr4H	GO:0003690, GO:0005739, GO:0006355	PF02536	IPR003690	specific to mild drought
HORVU2Hr1G041300	MLOC_62436	MYB	Transcription factor	up	up		up	myb domain protein 41	chr2H	GO:0003677	PF00249	IPR001005, IPR009057, IPR017930	common to mild and severe drought
HORVU3Hr1G083740	MLOC_52982	MYB	Transcription factor	up	up	up		myb-like transcription factor family protein	chr3H	GO:0003677	PF00249	IPR001005, IPR006447, IPR009057, IPR017930	specific to mild drought
HORVU1Hr1G091540	MLOC_74184	MYB-related	Transcription factor	down	down	down	down	Transcription factor RADIALIS	chr1H	GO:0003677	PF00249	IPR001005, IPR009057, IPR017877	common to mild and severe drought
HORVU3Hr1G052710	MLOC_7981	MYB-related	Transcription factor		down			myb-like transcription factor family protein	chr3H	GO:0003676, GO:0003677, GO:0008270	PF00249	IPR001005, IPR001878, IPR006447, IPR009057, IPR017930	common to mild and severe drought
HORVU6Hr1G066000	MLOC_68189	MYB-related	Transcription factor		down	down		myb-like transcription factor family protein	chr6H	GO:0003677	PF00249	IPR001005, IPR006447, IPR009057, IPR017930	specific to mild drought
HORVU2Hr1G017460	MLOC_65101	NAC	Transcription factor	up	up		up	NAC domain protein,	chr2H	GO:0003677, GO:0006355	PF02365	IPR003441	common to mild and severe drought
HORVU2Hr1G082330	MLOC_23616	NAC	Transcription factor	up	up	up	up	undescribed protein	chr2H	GO:0003677, GO:0006355	PF02365	IPR003441	common to mild and severe drought
HORVU5Hr1G111590	MLOC_37104	NAC	Transcription factor	up	up			NAC domain protein,	chr5H	GO:0003677, GO:0006355	PF02365	IPR003441	common to mild and severe drought
HORVU5Hr1G045640	MLOC_5832	NAC	Transcription factor		down		down	NAC domain protein,	chr5H	GO:0003677, GO:0006355	PF02365	IPR003441	common to mild and severe drought
HORVU1Hr1G063740	MLOC_63743	NAC	Transcription factor	up	up	up	up	NAC domain protein,	chr1H	GO:0003677, GO:0006355	PF02365	IPR003441	specific to mild drought
HORVU4Hr1G005670	MLOC_5869	NF-YA	Transcription factor	up	up			Nuclear transcription factor Y subunit A-9	chr4H	GO:0003677, GO:0003700, GO:0006355, GO:0016602	PF02045	IPR001289, IPR018362	specific to mild drought
HORVU1Hr1G071620	MLOC_36879	NF-YB	Transcription factor	up				Nuclear transcription factor Y subunit B	chr1H	GO:0005634, GO:0006355, GO:0043565, GO:0046982	PF00808	IPR003956, IPR003958, IPR009072	common to mild and severe drought
HORVU6Hr1G091700	MLOC_53881	Others	Transcriptional regulator		down			Ethylene receptor 3	chr6H	GO:0000155, GO:0000160, GO:0004673, GO:0005515, GO:0005789, GO:0007165, GO:0010105, GO:0038199, GO:0050896, GO:0051740	PF00072, PF00512, PF01590	IPR001789, IPR003018, IPR003594, IPR003661, IPR011006, IPR014525, IPR029016	common to mild and severe drought
HORVU2Hr1G017680	unknown	PHD	Transcriptional regulator		down	up	up	E3 ubiquitin-protein ligase SHPRH	chr2H	GO:0005515, GO:0005524, GO:0008270	PF00176, PF00628	IPR000330, IPR001965, IPR011011, IPR013083, IPR014001, IPR019786, IPR019787, IPR027417	specific to mild drought
HORVU6Hr1G034680	MLOC_6946	PHD	Transcriptional regulator	up				methyl-CPG-binding domain 9	chr6H	GO:0005515, GO:0005634, GO:0008270	PF00439, PF00628, PF15612	IPR001487, IPR001965, IPR003888, IPR003889, IPR011011, IPR013083, IPR018501, IPR019786, IPR019787, IPR028942	specific to mild drought
HORVU4Hr1G014660	MLOC_13610	RWP-RK	Transcription factor	up	up			Plant regulator RWP-RK family protein	chr4H	GO:0005515	PF00564, PF02042	IPR000270, IPR003035	specific to mild drought
HORVU2Hr1G072420	MLOC_67411	S1Fa-like	Transcription factor		down			Family of unknown function (DUF662)	chr2H	none	PF04949	IPR007033	specific to mild drought
HORVU3Hr1G094730	MLOC_52321	SBP	Transcription factor		down			Squamosa promoter-binding-like protein 2	chr3H	GO:0003677, GO:0005634	PF03110	IPR004333	specific to mild drought
HORVU5Hr1G062040	MLOC_61654	SCAI TF family	Transcription factor	up				Protein SCAI	chr5H	GO:0003714, GO:0006351	PF12070	IPR016607, IPR022709	specific to mild drought
HORVU1Hr1G054620	MLOC_57456	STAT	Transcription factor		down			SH2 domain protein B	chr1H	none	none	IPR000980, IPR013320	specific to mild drought
HORVU7Hr1G038130	MLOC_60577	TCP	Transcription factor		down			TCP family transcription factor	chr7H	none	PF03634	IPR005333, IPR017887	common to mild and severe drought
HORVU3Hr1G095400	MLOC_65229	TCP	Transcription factor		down		down	TCP family transcription factor	chr3H	none	PF03634	IPR005333, IPR017887	specific to mild drought
HORVU6Hr1G093960	MLOC_24269	TCP	Transcription factor		down			TCP family transcription factor	chr6H	none	PF03634	IPR005333, IPR017887	specific to mild drought
HORVU7Hr1G041230	MLOC_61774	Tify	Transcription factor		down		up	Protein TIFY 3A	chr7H	none	PF06200, PF09425	IPR010399, IPR018467	specific to mild drought
HORVU7Hr1G108000	MLOC_63061	TRAF	Transcriptional regulator	down	down			BTB/POZ domain-containing protein	chr7H	GO:0005515	PF00651	IPR000210, IPR008974, IPR011333	common to mild and severe drought
HORVU4Hr1G003040	MLOC_51988	TRAF	Transcriptional regulator		down			regulatory protein (NPR1)	chr4H	GO:0005515	PF00651, PF11900, PF12313, PF13637	IPR000210, IPR002110, IPR011333, IPR020683, IPR021094, IPR024228	specific to mild drought
HORVU3Hr1G074640	MLOC_51588	TRAF	Transcriptional regulator	down	down			regulatory protein (NPR1)	chr3H	GO:0005515	PF00651, PF11900, PF12313, PF13637	IPR000210, IPR002110, IPR011333, IPR020683, IPR021094, IPR024228	specific to mild drought
HORVU3Hr1G061930	MLOC_64975	TUB	Transcription factor	down		down	down	Tubby-like F-box protein 1	chr3H	none	PF01167	IPR000007, IPR018066, IPR025659	common to mild and severe drought
HORVU1Hr1G051260	MLOC_71477	WRKY	Transcription factor	down	down	down		WRKY DNA-binding protein 35	chr1H	GO:0003700, GO:0006355, GO:0043565	PF03106	IPR003657	common to mild and severe drought
HORVU1Hr1G081570	MLOC_32433	WRKY	Transcription factor	up	up			WRKY DNA-binding protein 24	chr1H	GO:0003700, GO:0006355, GO:0043565	PF03106	IPR003657	common to mild and severe drought
HORVU5Hr1G034830	MLOC_45055	WRKY	Transcription factor	down	down			WRKY family transcription factor	chr5H	GO:0003700, GO:0006355, GO:0043565	PF03106	IPR003657	common to mild and severe drought
HORVU5Hr1G065420	MLOC_4945	WRKY	Transcription factor	down	down	down	down	WRKY family transcription factor	chr5H	GO:0003700, GO:0006355, GO:0043565	PF03106	IPR003657	common to mild and severe drought
HORVU7Hr1G075960	MLOC_78461	WRKY	Transcription factor	down	down			WRKY DNA-binding protein 70	chr7H	GO:0003700, GO:0006355, GO:0043565	PF03106	IPR003657	common to mild and severe drought
HORVU1Hr1G069620	MLOC_5971	WRKY	Transcription factor		down			WRKY DNA-binding protein 54	chr1H	GO:0003700, GO:0006355, GO:0043565	PF03106	IPR003657	common to mild and severe drought
HORVU3Hr1G050590	MLOC_12079	WRKY	Transcription factor		down			WRKY DNA-binding protein 50	chr3H	GO:0003700, GO:0006355, GO:0043565	PF03106	IPR003657	specific to mild drought
HORVU5Hr1G065380	MLOC_60890	WRKY	Transcription factor	down	down			WRKY family transcription factor	chr5H	GO:0003700, GO:0006355, GO:0043565	PF03106	IPR003657	specific to mild drought

## Sheet: Supplementary Table S8
Supplementary Table S8. Target genes putatively regulated by specific transcription factors with differential expression in roots
TF gene		Putative target		Expression change of a target gene		Description of target gene	Putative function of target gene
MLOC ID	HORVU ID	MLOC ID	HORVU ID	Cam roots	Mar roots
MLOC_14844	HORVU6Hr1G068100	MLOC_15316	HORVU4Hr1G021720	up	up	G-box binding factor 3	regulation of gene expression
MLOC_14844	HORVU6Hr1G068100	MLOC_32633	HORVU5Hr1G077880	up	up	Beta-glucosidase 31	organic substance metabolic process
MLOC_14844	HORVU6Hr1G068100	MLOC_4480	HORVU2Hr1G062850	up	up	Unknown	unknown
MLOC_14844	HORVU6Hr1G068100	MLOC_66700	HORVU7Hr1G042790	up	up	ADP,ATP carrier protein 3, mitochondrial	transmembrane transport
MLOC_14844	HORVU6Hr1G068100	MLOC_80071	HORVU4Hr1G012010	up	up	Transducin/WD40 repeat-like superfamily protein	protein-protein interactions
MLOC_14844	HORVU6Hr1G068100	MLOC_28425	HORVU7Hr1G041470		up	Caleosin-related family protein	metabolism
MLOC_14844	HORVU6Hr1G068100	MLOC_52874	HORVU3Hr1G017630		up	Ca-2+ dependent nuclease	DNA metabolism
MLOC_14844	HORVU6Hr1G068100	MLOC_66714	HORVU3Hr1G079860		up	Pentatricopeptide repeat-containing protein	gene expression regulation on post-transcriptional level (organellar)
MLOC_14844	HORVU6Hr1G068100	MLOC_16587	HORVU4Hr1G028810	up		Pectinesterase 11	cell wall modification
MLOC_14844	HORVU6Hr1G068100	MLOC_29951	HORVU7Hr1G104220	up		30S ribosomal protein S11	organic substance metabolic process
MLOC_14844	HORVU6Hr1G068100	MLOC_55858	HORVU3Hr1G082730	up		Photosystem II 22 kDa protein, chloroplastic	plastid development
MLOC_14844	HORVU6Hr1G068100	MLOC_57145	HORVU1Hr1G070220	up		Alanine:glyoxylate aminotransferase 3	photrespiration
MLOC_14844	HORVU6Hr1G068100	MLOC_62551	HORVU6Hr1G074200	up		Dihydroorotate dehydrogenase (quinone)	redox, electron flow
MLOC_14844	HORVU6Hr1G068100	MLOC_67686	HORVU3Hr1G068380	up		Inorganic pyrophosphatase 1	defosforylation
MLOC_6711	HORVU1Hr1G090030	MLOC_13527	HORVU7Hr1G113290	up	up	Unknown	unknown
MLOC_6711	HORVU1Hr1G090030	MLOC_14214	HORVU3Hr1G059830	up	up	Iron-sulfur cluster assembly protein 1	sulfur compound metabolic process
MLOC_6711	HORVU1Hr1G090030	MLOC_14884	HORVU6Hr1G064620	up	up	Dehydrin COR410	response to abiotic stimulus
MLOC_6711	HORVU1Hr1G090030	MLOC_15021	HORVU6Hr1G087990	up	up	PAP-specific phosphatase HAL2-like	glycerolipid metabolic process
MLOC_6711	HORVU1Hr1G090030	MLOC_1740	HORVU7Hr1G046030	up	up	Na+/H+ (sodium hydrogen) exchanger 3	transmembrane transport
MLOC_6711	HORVU1Hr1G090030	MLOC_21885	HORVU6Hr1G053000	up	up	Unknown	unknown
MLOC_6711	HORVU1Hr1G090030	MLOC_26641	HORVU6Hr1G083600	up	up	Unknown	unknown
MLOC_6711	HORVU1Hr1G090030	MLOC_3982	HORVU4Hr1G034650	up	up	Protein ABERRANT POLLEN TRANSMISSION 1	transmembrane transport
MLOC_6711	HORVU1Hr1G090030	MLOC_55553	HORVU2Hr1G101040	up	up	Calcium-transporting ATPase, putative	transmembrane transport
MLOC_6711	HORVU1Hr1G090030	MLOC_60073	HORVU2Hr1G036960	up	up	Chlorophyll a-b binding protein 7, chloroplastic	plastid development
MLOC_6711	HORVU1Hr1G090030	MLOC_6125	HORVU3Hr1G064550	up	up	Serine/arginine-rich splicing factor 1	RNA metabolic process
MLOC_6711	HORVU1Hr1G090030	MLOC_61260	HORVU7Hr1G064100	up	up	Proton gradient regulation 5	redox, electron flow
MLOC_6711	HORVU1Hr1G090030	MLOC_63525	HORVU3Hr1G019510	up	up	Zinc finger CCCH domain-containing protein 2	regulation of gene expression
MLOC_6711	HORVU1Hr1G090030	MLOC_77985	HORVU4Hr1G063350	up	up	Heat shock protein 21	stress response
MLOC_6711	HORVU1Hr1G090030	MLOC_8076	HORVU3Hr1G062940	up	up	O-acyltransferase (WSD1-like) family protein	glycerolipid metabolic process
MLOC_6711	HORVU1Hr1G090030	MLOC_60937	HORVU4Hr1G051400		up	Thioredoxin F2	redox
MLOC_6711	HORVU1Hr1G090030	MLOC_61601	HORVU2Hr1G027680		up	Haloacid dehalogenase-like hydrolase (HAD) superfamily protein	phophorous homeostasis, detoxification
MLOC_6711	HORVU1Hr1G090030	MLOC_64408	HORVU7Hr1G078670		up	Cleavage and polyadenylation specificity factor subunit 5	regulation of gene expression
MLOC_6711	HORVU1Hr1G090030	MLOC_22824	HORVU5Hr1G096950	up		Cytochrome P450 superfamily protein	redox, electron flow
MLOC_6711	HORVU1Hr1G090030	MLOC_3858	HORVU6Hr1G032960	up		Calcium-binding protein 4	signalling
MLOC_6711	HORVU1Hr1G090030	MLOC_78806	HORVU3Hr1G087380	up		30S ribosomal protein S12	organic substance metabolic process
MLOC_75166	HORVU7Hr1G056820	MLOC_1044	HORVU1Hr1G018370	up	up	Unknown	unknown
MLOC_75166	HORVU7Hr1G056820	MLOC_20639	HORVU3Hr1G068810	up	up	Beta-fructofuranosidase, insoluble isoenzyme 7	succrose metabolism
MLOC_75166	HORVU7Hr1G056820	MLOC_23616	HORVU2Hr1G082330	up	up	Unknown	regulation of gene expression
MLOC_75166	HORVU7Hr1G056820	MLOC_37104	HORVU5Hr1G111590	up	up	NAC domain protein	regulation of gene expression
MLOC_75166	HORVU7Hr1G056820	MLOC_44536	HORVU3Hr1G007500	up	up	16.9 kDa class I heat shock protein 1	stress response
MLOC_75166	HORVU7Hr1G056820	MLOC_6125	HORVU3Hr1G064550	up	up	Serine/arginine-rich splicing factor 1	RNA metabolic process
MLOC_75166	HORVU7Hr1G056820	MLOC_74277	HORVU5Hr1G078060	up	up	Mitogen-activated protein kinase 1	signalling
MLOC_75166	HORVU7Hr1G056820	MLOC_75166	HORVU7Hr1G056820	up	up	Heat stress transcription factor B-2b	regulation of gene expression
MLOC_75166	HORVU7Hr1G056820	MLOC_78762	HORVU3Hr1G020520	up	up	17.6 kDa class II heat shock protein	stress response
MLOC_75166	HORVU7Hr1G056820	MLOC_79789	HORVU7Hr1G003170	up	up	LEA	embryo development
MLOC_75166	HORVU7Hr1G056820	MLOC_60937	HORVU4Hr1G051400		up	Thioredoxin F2	redox
MLOC_75166	HORVU7Hr1G056820	MLOC_24040	HORVU1Hr1G071430	up		Unknown	unknown
MLOC_75166	HORVU7Hr1G056820	MLOC_72096	HORVU2Hr1G048220	up		Transmembrane protein 184A	transmembrane transport
MLOC_75166	HORVU7Hr1G056820	MLOC_77485	HORVU2Hr1G036110	up		NADP-dependent glyceraldehyde-3-phosphate dehydrogenase	carbon fixation, maetabliism
MLOC_75166	HORVU7Hr1G056820	MLOC_82019	HORVU0Hr1G007470	up		Jasmonate induced protein	hormone siganlling
MLOC_81003	HORVU5Hr1G014170	MLOC_20163	HORVU6Hr1G083720	up	up	Transmembrane amino acid transporter family protein	transmembrane transport
MLOC_81003	HORVU5Hr1G014170	MLOC_21885	HORVU6Hr1G053000	up	up	Unknown	unknown
MLOC_81003	HORVU5Hr1G014170	MLOC_3114	HORVU7Hr1G077860	up	up	Seed maturation protein	stress response
MLOC_81003	HORVU5Hr1G014170	MLOC_37693	HORVU2Hr1G040830	up	up	F-box family protein	signalling
MLOC_81003	HORVU5Hr1G014170	MLOC_47741	HORVU1Hr1G067080	up	up	Early light-induced protein, chloroplastic	plastid development
MLOC_81003	HORVU5Hr1G014170	MLOC_51183	HORVU1Hr1G043890	up	up	Aquaporin-like superfamily protein	stress response
MLOC_81003	HORVU5Hr1G014170	MLOC_55348	HORVU3Hr1G093350	up	up	Selenium-binding protein 1	intra-Golgi protein transport, redox
MLOC_81003	HORVU5Hr1G014170	MLOC_60073	HORVU2Hr1G036960	up	up	Chlorophyll a-b binding protein 7, chloroplastic	plastid development
MLOC_81003	HORVU5Hr1G014170	MLOC_60376	HORVU5Hr1G059140	up	up	Unknown	unknown
MLOC_81003	HORVU5Hr1G014170	MLOC_6125	HORVU3Hr1G064550	up	up	Serine/arginine-rich splicing factor 1	RNA metabolic process
MLOC_81003	HORVU5Hr1G014170	MLOC_61260	HORVU7Hr1G064100	up	up	Proton gradient regulation 5	redox, electron flow
MLOC_81003	HORVU5Hr1G014170	MLOC_6711	HORVU1Hr1G090030	up	up	G-box binding factor 2	regulation of gene expression
MLOC_81003	HORVU5Hr1G014170	MLOC_68719	HORVU3Hr1G076960	up	up	Eukaryotic translation initiation factor 3 subunit L	regulation of translation
MLOC_81003	HORVU5Hr1G014170	MLOC_77985	HORVU4Hr1G063350	up	up	Heat shock protein 21	stress response
MLOC_81003	HORVU5Hr1G014170	MLOC_8076	HORVU3Hr1G062940	up	up	O-acyltransferase (WSD1-like) family protein	glycerolipid metabolic process
MLOC_81003	HORVU5Hr1G014170	MLOC_61601	HORVU2Hr1G027680		up	Haloacid dehalogenase-like hydrolase (HAD) superfamily protein	phophorous homeostasis, detoxification

## Sheet: Supplementary Table S9
Supplementary Table S9. The list of transcription factors and transcriptional regulators encoding genes identified within genes differentially expressed in CamB and Maresi roots under the severe drought stress. The information on possible differential expression of a particular gene in leaves after severe drought is provided. Green background indicate these DEGs that were common between mild and …
Gene_ID (HORVU)	Gene_ID (MLOC)	Family Name	Category	Expression change				Gene description	Chromosome	GO Ids	Pfam Ids	InterPro Ids	Notes
				Cam Root	Mar Root	Cam Leaves	Mar leaves
HORVU1Hr1G090250	MLOC_53577	AP2/ERF-ERF	Transcription factor	up	up	up	up	Ethylene-responsive transcription factor 1	chr1H	GO:0003677, GO:0003700, GO:0006355	PF00847	IPR001471, IPR016177	common to mild and severe drought
HORVU7Hr1G026940	MLOC_76250	AP2/ERF-ERF	Transcription factor		up	up	up	Ethylene-responsive transcription factor 5	chr7H	GO:0003677, GO:0003700, GO:0006355	PF00847	IPR001471, IPR016177	common to mild and severe drought
HORVU7Hr1G089930	MLOC_59305	AP2/ERF-ERF	Transcription factor	down	down			Ethylene-responsive transcription factor 1	chr7H	GO:0003677, GO:0003700, GO:0006355	PF00847	IPR001471, IPR016177	common to mild and severe drought
HORVU3Hr1G010190	MLOC_75135	AP2/ERF-ERF	Transcription factor	down	down		down	B3 domain-containing transcription factor NGA2	chr3H	GO:0003677, GO:0003700, GO:0006355	PF00847, PF02362	IPR001471, IPR003340, IPR015300, IPR016177	common to mild and severe drought
HORVU1Hr1G060490	MLOC_77405	AP2/ERF-ERF	Transcription factor		up			Ethylene-responsive transcription factor 4	chr1H	GO:0003677, GO:0003700, GO:0006355	PF00847	IPR001471, IPR016177	specific to severe drought
HORVU5Hr1G055190	MLOC_55173	AP2/ERF-ERF	Transcription factor		up			Ethylene-responsive transcription factor 10	chr5H	GO:0003677, GO:0003700, GO:0006355	PF00847	IPR001471, IPR016177	specific to severe drought
HORVU5Hr1G062940	MLOC_38561	AP2/ERF-ERF	Transcription factor		up	up		Ethylene-responsive transcription factor 1	chr5H	GO:0003677, GO:0003700, GO:0006355	PF00847	IPR001471, IPR016177	specific to severe drought
HORVU7Hr1G032750	MLOC_18529	AP2/ERF-ERF	Transcription factor		up			Ethylene-responsive transcription factor 1	chr7H	GO:0003677, GO:0003700, GO:0006355	PF00847	IPR001471, IPR016177	specific to severe drought
n/a	MLOC_10878	AP2/ERF-ERF	Transcription factor		up			n/a		n/a	n/a	n/a	specific to severe drought
HORVU3Hr1G003400	MLOC_69438	AP2/ERF-ERF	Transcription factor	up	up			Ethylene-responsive transcription factor 11	chr3H	GO:0003677, GO:0003700, GO:0006355	PF00847	IPR001471, IPR016177	specific to severe drought
HORVU1Hr1G011800	MLOC_77763	AP2/ERF-ERF	Transcription factor	down	down	down	down	AP2-like ethylene-responsive transcription factor	chr1H	GO:0003677, GO:0003700, GO:0006355	PF00847	IPR001471, IPR016177	specific to severe drought
HORVU2Hr1G071270	MLOC_67883	AP2/ERF-ERF	Transcription factor		up	up	up	Ethylene-responsive transcription factor 1	chr2H	GO:0003677, GO:0003700, GO:0006355	PF00847	IPR001471, IPR016177	specific to severe drought
HORVU2Hr1G111510	MLOC_12223	AP2/ERF-ERF	Transcription factor	up		up		Ethylene-responsive transcription factor 1	chr2H	GO:0003677, GO:0003700, GO:0006355	PF00847	IPR001471, IPR016177	specific to severe drought
HORVU3Hr1G064590	MLOC_44012	AP2/ERF-RAV	Transcription factor		up			auxin response factor 20	chr3H	GO:0003677	PF02362	IPR003340, IPR015300	specific to severe drought
HORVU1Hr1G017770	MLOC_52044	AUX/IAA	Transcriptional regulator	down	down	down	down	Auxin-responsive protein IAA4	chr1H	GO:0005515, GO:0005634, GO:0006355	PF02309	IPR000270, IPR003311	common to mild and severe drought
HORVU4Hr1G049130	MLOC_73033	AUX/IAA	Transcriptional regulator		down	down		Auxin-responsive protein IAA30	chr4H	none	none	none	specific to severe drought
HORVU4Hr1G016160	MLOC_75265	AUX/IAA	Transcriptional regulator		down	up		Auxin-responsive protein IAA27	chr4H	GO:0005515, GO:0005634, GO:0006355	PF02309	IPR000270, IPR003311	specific to severe drought
HORVU5Hr1G093640	MLOC_58812	AUX/IAA	Transcriptional regulator		down	down	down	Auxin-responsive protein IAA12	chr5H	GO:0005515, GO:0005634, GO:0006355	PF02309	IPR000270, IPR003311	specific to severe drought
HORVU5Hr1G094230	MLOC_54787	AUX/IAA	Transcriptional regulator	down	down	down	down	Chromosome 3B, genomic scaffold, cultivar Chinese Spring	chr5H	none	none	none	specific to severe drought
HORVU5Hr1G014290	MLOC_60624	AUX/IAA	Transcriptional regulator		down	down	down	Auxin-responsive protein IAA31	chr5H	GO:0005515, GO:0005634, GO:0006355	PF02309	IPR000270, IPR003311	specific to severe drought
HORVU3Hr1G019750	MLOC_56819	AUX/IAA	Transcriptional regulator	down	down	down	down	Auxin-responsive protein IAA2	chr3H	GO:0005515, GO:0005634, GO:0006355	PF02309	IPR000270, IPR003311	specific to severe drought
HORVU7Hr1G004350	MLOC_71305	B3	Transcription factor	up	up			B3 domain-containing protein	chr7H	GO:0003677	PF02362	IPR003340, IPR015300	specific to severe drought
HORVU2Hr1G029110	MLOC_12054	B3	Transcription factor	down	down			B3 domain-containing protein	chr2H	GO:0003677	PF02362	IPR003340, IPR015300	specific to severe drought
HORVU5Hr1G117800	MLOC_76431	B3	Transcription factor		down	down	down	B3 domain-containing protein	chr5H	GO:0003677	PF02362	IPR003340, IPR015300	specific to severe drought
HORVU1Hr1G076690	MLOC_38232	B3-ARF	Transcription factor		down		down	Auxin response factor 14	chr1H	none	none	none	specific to severe drought
HORVU3Hr1G032230	MLOC_65945	B3-ARF	Transcription factor	down	down		down	Auxin response factor 1	chr3H	GO:0003677, GO:0005515, GO:0005634, GO:0006355, GO:0009725	PF02309, PF02362, PF06507	IPR000270, IPR003311, IPR003340, IPR010525, IPR015300	specific to severe drought
HORVU6Hr1G058890	MLOC_77438	B3-ARF	Transcription factor		down	down	down	auxin response factor 16	chr6H	GO:0003677, GO:0005515, GO:0005634, GO:0006355, GO:0009725	PF02362, PF06507	IPR000270, IPR003340, IPR010525, IPR015300	specific to severe drought
HORVU7Hr1G088980	MLOC_6679	BES1	Transcription factor	down	down			BES1/BZR1 homolog 4	chr7H	none	PF05687	IPR008540	specific to severe drought
n/a	MLOC_52839	BES1	Transcription factor		down		down	n/a		n/a	n/a	n/a	specific to severe drought
HORVU3Hr1G108680	MLOC_36351	bHLH	Transcription factor	down	down			Transcription factor ORG2	chr3H	GO:0046983	PF00010	IPR011598	common to mild and severe drought
HORVU7Hr1G055180	MLOC_44870	bHLH	Transcription factor		down			Transcription factor bHLH137	chr7H	GO:0046983	PF00010	IPR011598	common to mild and severe drought
HORVU3Hr1G089090	MLOC_20318	bHLH	Transcription factor		down			basic helix-loop-helix (bHLH) DNA-binding superfamily protein	chr3H	GO:0046983	PF00010	IPR011598	specific to severe drought
HORVU5Hr1G107520	MLOC_58414	bHLH	Transcription factor		up			Transcription factor BPE	chr5H	GO:0046983	PF00010	IPR011598	specific to severe drought
HORVU2Hr1G105960	MLOC_45114	bHLH	Transcription factor	down				Transcription factor bHLH96	chr2H	none	none	none	specific to severe drought
HORVU3Hr1G096460	MLOC_46407	bHLH	Transcription factor	up	up	up	up	Transcription factor ICE1	chr3H	GO:0046983	PF00010	IPR011598	specific to severe drought
HORVU3Hr1G018980	MLOC_21524	bHLH	Transcription factor	down	down			basic helix-loop-helix (bHLH) DNA-binding family protein	chr3H	GO:0046983	PF00010	IPR011598	specific to severe drought
HORVU6Hr1G068980	MLOC_57269	bHLH	Transcription factor		up	down	down	Transcription factor bHLH63	chr6H	GO:0046983	PF00010	IPR011598	specific to severe drought
HORVU0Hr1G013950	MLOC_79342	bZIP	Transcription factor	up	up	up	up	G-box binding factor 3	chrUn	GO:0003700, GO:0006355, GO:0043565	PF00170	IPR004827	common to mild and severe drought
HORVU4Hr1G021720	MLOC_15316	bZIP	Transcription factor	up	up	up	up	G-box binding factor 3	chr4H	GO:0003700, GO:0006355, GO:0043565	PF00170	IPR004827	common to mild and severe drought
HORVU1Hr1G086580	MLOC_15949	bZIP	Transcription factor		up	up	up	BEST Arabidopsis thaliana protein match is: transcription factor-related .	chr1H	GO:0006351, GO:0043565	PF14144	IPR025422	common to mild and severe drought
HORVU3Hr1G084360	MLOC_34679	bZIP	Transcription factor	up	up		up	ABSCISIC ACID-INSENSITIVE 5-like protein 2	chr3H	GO:0003700, GO:0006355, GO:0043565	PF00170	IPR004827	specific to severe drought
HORVU7Hr1G118520	MLOC_14243	bZIP	Transcription factor		down	down	down	Basic-leucine zipper (bZIP) transcription factor family protein	chr7H	GO:0003700, GO:0006355, GO:0043565	PF00170	IPR004827	specific to severe drought
HORVU0Hr1G015700	MLOC_58614	bZIP	Transcription factor		down			Alpha/beta hydrolase family protein	chrUn	none	PF09752	IPR019149, IPR029058	specific to severe drought
HORVU2Hr1G021080	MLOC_51930	bZIP	Transcription factor		up		up	Basic-leucine zipper (bZIP) transcription factor family protein	chr2H	GO:0003700, GO:0006355, GO:0043565	PF00170	IPR004827	specific to severe drought
HORVU6Hr1G017710	MLOC_63436	bZIP	Transcription factor	down	down			undescribed protein	chr6H	none	none	none	specific to severe drought
HORVU7Hr1G056230	MLOC_61077	bZIP	Transcription factor	down	down		down	Basic-leucine zipper (bZIP) transcription factor family protein	chr7H	GO:0003700, GO:0006355, GO:0043565	PF00170	IPR004827	specific to severe drought
HORVU5Hr1G045690	MLOC_39203	bZIP	Transcription factor	down	down			Basic-leucine zipper (bZIP) transcription factor family protein	chr5H	GO:0003700, GO:0006355, GO:0043565	PF00170	IPR004827	specific to severe drought
HORVU4Hr1G025130	MLOC_17690	bZIP	Transcription factor	down	down	down	down	transcription factor-related	chr4H	GO:0003700, GO:0006351, GO:0006355, GO:0043565	PF00170, PF14144	IPR004827, IPR025422	specific to severe drought
HORVU1Hr1G037590	MLOC_58500	bZIP	Transcription factor		up			bZIP transcription factor 17	chr1H	none	none	none	specific to severe drought
HORVU6Hr1G016240	MLOC_81641	bZIP	Transcription factor		down			Transcription factor HBP-1a	chr6H	GO:0003700, GO:0006355, GO:0043565	PF00170, PF07777	IPR004827, IPR012900	specific to severe drought
HORVU2Hr1G017820	MLOC_44311	bZIP	Transcription factor		down			Basic-leucine zipper (bZIP) transcription factor family protein	chr2H	GO:0003700, GO:0006355, GO:0043565	PF00170	IPR004827	specific to severe drought
HORVU4Hr1G050190	MLOC_60045	bZIP	Transcription factor		down			Basic-leucine zipper (bZIP) transcription factor family protein	chr4H	GO:0003700, GO:0006355, GO:0043565	PF00170	IPR004827	specific to severe drought
HORVU6Hr1G071950	MLOC_50966	C2C2-CO-like	Transcription factor	down	down		down	Zinc finger protein CONSTANS-LIKE 10	chr6H	GO:0005515, GO:0005622, GO:0008270	PF00643, PF06203	IPR000315, IPR010402	common to mild and severe drought
n/a	MLOC_77036	C2C2-CO-like	Transcription factor		down	down	down	n/a		n/a	n/a	n/a	specific to severe drought
HORVU5Hr1G051230	MLOC_75092	C2C2-CO-like	Transcription factor	up	up		up	CONSTANS-like 2	chr5H	GO:0005515, GO:0005622, GO:0008270	PF00643, PF06203	IPR000315, IPR010402	specific to severe drought
HORVU5Hr1G021290	MLOC_74620	C2C2-Dof	Transcription factor		up			DOF zinc finger protein 1	chr5H	GO:0003677, GO:0006355	PF02701	IPR003851	specific to severe drought
HORVU3Hr1G116220	MLOC_54725	C2C2-Dof	Transcription factor	down	down		down	DOF zinc finger protein 1	chr3H	GO:0003677, GO:0006355	PF02701	IPR003851	specific to severe drought
HORVU1Hr1G056280	MLOC_39421	C2C2-GATA	Transcription factor		down			GATA transcription factor 2	chr1H	GO:0003700, GO:0006355, GO:0008270, GO:0043565	PF00320	IPR000679, IPR013088	specific to severe drought
HORVU5Hr1G036330	MLOC_71376	C2C2-GATA	Transcription factor		up			GATA transcription factor 9	chr5H	GO:0003700, GO:0006355, GO:0008270, GO:0043565	PF00320	IPR000679, IPR013088	specific to severe drought
HORVU7Hr1G074030	MLOC_64962	C2C2-LSD	Transcription factor		down		down	LSD1 zinc finger family protein	chr7H	none	PF06943	IPR005735	specific to severe drought
HORVU4Hr1G019890	MLOC_64234	C2H2	Transcription factor		down	down		C2H2-like zinc finger protein	chr4H	GO:0003950, GO:0046872	none	IPR007087, IPR012317	specific to severe drought
n/a	MLOC_11665	C2H2	Transcription factor		down			n/a		n/a	n/a	n/a	specific to severe drought
HORVU4Hr1G013460	MLOC_51405	C2H2	Transcription factor	up	up	up	up	zinc-finger protein 2	chr4H	GO:0046872	PF13912	IPR007087, IPR015880	specific to severe drought
HORVU1Hr1G006910	MLOC_39000	C2H2	Transcription factor	down	down		down	zinc-finger protein 3	chr1H	GO:0046872	PF13912	IPR007087, IPR015880	specific to severe drought
HORVU2Hr1G125580	MLOC_64556	C2H2	Transcription factor	down	down	down	down	C2H2-like zinc finger protein	chr2H	none	none	none	specific to severe drought
n/a	MLOC_71770	C2H2	Transcription factor		up	up	up	n/a		n/a	n/a	n/a	specific to severe drought
HORVU7Hr1G114960	MLOC_37646	C2H2	Transcription factor	up	up			Demethylmenaquinone methyltransferase	chr7H	GO:0008152, GO:0008168	PF08241	IPR013216, IPR029063	specific to severe drought
HORVU4Hr1G070950	MLOC_60958	C2H2	Transcription factor	down	down		down	indeterminate(ID)-domain 2	chr4H	GO:0003676, GO:0046872	PF12171	IPR007087, IPR013087, IPR015880, IPR022755	specific to severe drought
HORVU3Hr1G019510	MLOC_63525	C3H	Transcription factor	up	up	up	up	Zinc finger CCCH domain-containing protein 2	chr3H	GO:0046872	PF00642	IPR000571	common to mild and severe drought
HORVU1Hr1G095270	MLOC_56050	C3H	Transcription factor	up	up			Zinc finger CCCH domain-containing protein 37	chr1H	GO:0046872	PF00642	IPR000571	specific to severe drought
HORVU7Hr1G081540	MLOC_64012	CPP	Transcription factor		up			TESMIN/TSO1-like CXC 2	chr7H	none	PF03638	IPR005172	specific to severe drought
[truncated: 159 more rows]

## Sheet: Supplementary Table S10
Supplementary Table S10. The comparison of expression pattern of transcription factors and transcription regulators encoding genes under mild and severe drought stress in roots and leaves of CamB and Maresi barley genotypes.
[truncated: 48 more rows]
